# Supplementary material
Source: publisher figshare collection journal article supplement (https://karger.figshare.com/ndownloader/files/28689390)
Supplement: Supplementary file 1 [file 28689390]

## Sheet: All articles
Neural Crest Cell													Cancer
Hedgehog							BMP						FAS					Hedgehog							Notch							Wnt						IGF						GPCR
Title	URL	Description	Gene(s)				Title	URL	Description	Gene(s)			Title	URL	Description	Gene(s)		Title	URL	Description	Gene(s)				Title	URL	Description	Gene(s)				Title	URL	Description	Gene(s)			Title	URL	Description	Gene(s)			Title	URL	Description	Gene(s)
A role for smoothened during murine lens and cornea development.	/pubmed/25268479	Choi JJ, Ting CT, Trogrlic L, Milevski SV, Familari M, Martinez G, de Iongh RU.	Ptch1, Smo, Gli2, Gli3, p57Kip2, c-Maf, E-cadherin, Pax6, FoxE3, Hes1				YAP promotes neural crest emigration through interactions with BMP and Wnt activities.	/pubmed/31228951	Kumar D, Nitzan E, Kalcheim C.	YAP, BMP,Wnt, FoxD3			Macrophages Promote Growth of Squamous Cancer Independent of T cells.	/pubmed/31189369	Wu FL, Nolan K, Strait AA, Bian L, Nguyen KA, Wang JH, Jimeno A, Zhou HM, Young CD, Wang XJ.	TGFβ1, FLIP,pSmad3		Sonic hedgehog pathway activation is associated with cetuximab resistance and EPHB3 receptor induction in colorectal cancer.	/pubmed/31149041	Park SH, Jo MJ, Kim BR, Jeong YA, Na YJ, Kim JL, Jeong S, Yun HK, Kim DY, Kim BG, Kang SH, Oh SC, Lee DH.	EPHB3R, STAT3, Gli-1, SOX-2, Vimentin				Anti-tumor Drug THZ1 Suppresses TGFÔ_2-mediated EMT in Lens Epithelial Cells via Notch and TGFÔ_/Smad Signaling Pathway.	/pubmed/31333795	Ning J, Ma X, Long C, Mao Y, Kuang X, Huang Z, Fan Y, Zhang H, Xia Q, Wang R, Liang Y, Lin S, Zhang Q, Shen H.	THZ1, Smad2, MAPK, PI3K/AKT, Notch				Jatrorrhizine inhibits mammary carcinoma cells by targeting TNIK mediated Wnt/Ô_-catenin signalling and epithelial-mesenchymal transition (EMT).	/pubmed/31302315	Sun Y, Gao X, Wu P, Wink M, Li J, Dian L, Liang Z.	TNIK			The Insulin-Like Growth Factor 2 mRNA Binding Protein IMP2/IGF2BP2 is Overexpressed and Correlates with Poor Survival in Pancreatic Cancer.	/pubmed/31261900	Dahlem C, Barghash A, Puchas P, Haybaeck J, Kessler SM.	IGF2BP2, PLEK2			Lgr5-mediated p53 Repression through PDCD5 leads to doxorubicin resistance in Hepatocellular Carcinoma.	/pubmed/31244936	Ma Z, Guo D, Wang Q, Liu P, Xiao Y, Wu P, Wang Y, Chen B, Liu Z, Liu Q.	Lgr5 , PDCD5, p53
Developmental expression and role of Kinesin Eg5 during Xenopus laevis embryogenesis.	/pubmed/24357413	FernÌÁndez JP, AgÌ_ero TH, Vega LÌ_pez GA, Marranzino G, Cerrizuela S, Aybar MJ.	eg5				Embryonic bone morphogenetic protein and nodal induce invasion in melanocytes and melanoma cells.	/pubmed/29716947	Sinnberg T, Niessner H, Levesque MP, Dettweiler C, Garbe C, Busch C.	BMP-2			CRHR2/Ucn2 signaling is a novel regulator of miR-7/YY1/Fas circuitry contributing to reversal of colorectal cancer cell resistance to Fas-mediated apoptosis.	/pubmed/28929494	Pothoulakis C, Torre-Rojas M, Duran-Padilla MA, Gevorkian J, Zoras O, Chrysos E, Chalkiadakis G, Baritaki S.	CRHR2; Fas; YY1;		BRM270 Inhibits the Proliferation of CD44 Positive Pancreatic Ductal Adenocarcinoma Cells via Downregulation of Sonic Hedgehog Signaling.	/pubmed/31049070	Huynh DL, Koh H, Chandimali N, Zhang JJ, Kim N, Kang TY, Ghosh M, Gera M, Park YH, Kwon T, Jeong DK.	CD44				Knockdown of Notch1 inhibits nasopharyngeal carcinoma cell growth and metastasis via downregulation of CCL2, CXCL16, and uPA.	/pubmed/31270884	Guo H, Wang F, Diao Y, Zhang Z, Chen Q, Qian CN, Keller ET, Zhang J, Lu Y.	CCL2, CXCL16, and uPA, E-cadherin, vimentin				Exogenous regucalcin negatively regulates the progression of cervical adenocarcinoma.	/pubmed/31289533	Li X, Huang Y, Guo S, Xie M, Bin X, Shi M, Chen A, Chen S, Wu F, Hu Q, Zhou S.	matrix metalloproteinase (MMP)-3, MMP-7 and MMP-9, (GSK)-3β, β-catenin			Multiplex quantitative analysis of stroma-mediated cancer cell invasion, matrix remodeling, and drug response in a 3D co-culture model of pancreatic tumor spheroids and stellate cells.	/pubmed/31200779	Hwang HJ, Oh MS, Lee DW, Kuh HJ.	IL-6, IL-8, IGF-1, EGF, TIMP-1, uPA, PAI-1, and TSP-1			The mu-opioid receptor is a molecular marker for poor prognosis in hepatocellular carcinoma and represents a potential therapeutic target.	/pubmed/30915986	Chen DT, Pan JH, Chen YH, Xing W, Yan Y, Yuan YF, Zeng WA.	MOP
Notochordal and foregut abnormalities correlate with elevated neural crest apoptosis in Patch embryos.	/pubmed/21557455	Snider P, Simmons O, Rogers R, Young R, Gosnell M, Conway SJ.	PTCH (Patch)*				Wnt-signaling enhances neural crest migration of melanoma cells and induces an invasive phenotype.	/pubmed/29454361	Sinnberg T, Levesque MP, Krochmann J, Cheng PF, Ikenberg K, Meraz-Torres F, Niessner H, Garbe C, Busch C.	Wnt3a; β-catenin			Characteristics of Mel Ibr Melanoma Line Subclone after Treatment with Chicken Embryo Extract.	/pubmed/28726209	Suraeva NM, Morozova LF, Ryabaya OO, Khochenkova YA, Samoilov AV, Burova OS, Golubtsova NV, Barmashov AE, Baryshnikova MA.	E-cadherin, vimentin		Transcriptomic Characterization, Chemosensitivity and Regulatory Effects of Exosomes in Spontaneous EMT/MET Transitions of Breast Cancer Cells.	/pubmed/31018947	Bigagli E, Cinci L, D'Ambrosio M, Luceri C.	LGR5, FZD10, DTX1, ErbB3, FTH1 and DLL4				Non-contact co-culture with human vascular endothelial cells promotes epithelial-to-mesenchymal transition of cervical cancer SiHa cells by activating the NOTCH1/LOX/SNAIL pathway.	/pubmed/31205475	Ou J, Guan D, Yang Y.	MMP-2 and MMP-9, vimentin, NOTCH 1, LOX, and SNAIL1				miR-516a-3p inhibits breast cancer cell growth and EMT by blocking the Pygo2/Wnt signalling pathway.	/pubmed/31273950	Chi Y, Wang F, Zhang T, Xu H, Zhang Y, Shan Z, Wu S, Fan Q, Sun Y.	Pygo2, miR-516a-3p			microRNA-944 inhibits the malignancy of hepatocellular carcinoma by directly targeting IGF-1R and deactivating the PI3K/Akt signaling pathway.	/pubmed/31114322	Lv L, Wang X, Ma T.	microRNA-944			A Novel ACKR2-Dependent Role of Fibroblast-Derived CXCL14 in Epithelial-to-Mesenchymal Transition and Metastasis of Breast Cancer.	/pubmed/30850359	Sj’_berg E, Meyrath M, Milde L, Herrera M, L’_vrot J, H’_gerstrand D, Frings O, Bartish M, Rolny C, Sonnhammer E, Chevign’© A, Augsten M, ’_stman A.	CXCL14, NOS1, ACKR2
Early migrating neural crest cells can form ventral neural tube derivatives when challenged by transplantation.	/pubmed/9808781	Ruffins S, Artinger KB, Bronner-Fraser M.	FP-1 Islet-1 , HNK-1				Alcohol exposure induces chick craniofacial bone defects by negatively affecting cranial neural crest development.	/pubmed/28919490	Zhang P, Wang G, Lin Z, Wu Y, Zhang J, Liu M, Lee KKH, Chuai M, Yang X.	Ap-2ɑ, Pax7,HNK-1, Laminin, N-Cadherin, Cadherin 6B, Cadherin 7, slug, Msx1, FoxD3, BMP4			MUC1 O-glycosylation contributes to anoikis resistance in epithelial cancer cells.	/pubmed/28725490	Piyush T, Rhodes JM, Yu LG.	E-cadherin, integrinβ1, Fas,		Dbx2 exhibits a tumor-promoting function in hepatocellular carcinoma cell lines via regulating Shh-Gli1 signaling.	/pubmed/30833799	Hu YT, Li BF, Zhang PJ, Wu D, Li YY, Li ZW, Shen L, Dong B, Gao J, Zhu X.	Dbx2, FTCH1				Mutual regulation of JAG2 and PRAF2 promotes migration and invasion of colorectal cancer cells uncoupled from epithelial-mesenchymal transition.	/pubmed/31198409	He W, Tang J, Li W, Li Y, Mei Y, He L, Zhong K, Xu R.	JAG2, PRAF2				MiR-496 promotes migration and epithelial-mesenchymal transition by targeting RASSF6 in colorectal cancer.	/pubmed/31273789	Wang H, Yan B, Zhang P, Liu S, Li Q, Yang J, Yang F, Chen E.	RASSF6, microRNA-496			Up-regulation of Insulin-like Growth Factor Binding Protein-3 Is Associated with Brain Metastasis in Lung Adenocarcinoma.	/pubmed/31085806	Yang L, Li J, Fu S, Ren P, Tang J, Wang N, Shi X, Wu J, Lin S.	IGFBP3, Smad4			Prognostic impact of mRNA levels of LGR5 transcript variants in OSCC patients.	/pubmed/30770730	Rot S, Kaune T, Taubert H, Greither T, Kotrba J, G’_ttler A, Wichmann H, Bilkenroth U, Wienke A, Al-Nawas B, Bache M, Vordermark D, Wickenhauser C, Bethmann D, Eckert AW, Kappler M.	LGR5
							Endometrial Stromal and Epithelial Cells Exhibit Unique Aberrant Molecular Defects in Patients With Endometriosis.	/pubmed/28490276	Logan PC, Yango P, Tran ND.	HAND2, WNT4, IL-15, POSTN, MMP7,TGFβ1, ZEB1			Fas signaling induces stemness properties in colorectal cancer by regulation of Bmi1.	/pubmed/28543447	Chen J, Wang Y, Zhuo L, Liu Z, Liu T, Li W, Cai Y, Zheng H.	FasL, Bmi1,		Sonic hedgehog pathway activation regulates cervical cancer stem cell characteristics during epithelial to mesenchymal transition.	/pubmed/30714153	Sharma A, De R, Javed S, Srinivasan R, Pal A, Bhattacharyya S.	GANT58, E-cadherin				The Anthrax Toxin Receptor 1 (ANTXR1) Is Enriched in Pancreatic Cancer Stem Cells Derived from Primary Tumor Cultures.	/pubmed/31191663	Alcal’ S, Martinelli P, Hermann PC, Heeschen C, Sainz B Jr.	IL-6/JAK/STAT3, ANTXR1				Lgr5-mediated p53 Repression through PDCD5 leads to doxorubicin resistance in Hepatocellular Carcinoma.	/pubmed/31244936	Ma Z, Guo D, Wang Q, Liu P, Xiao Y, Wu P, Wang Y, Chen B, Liu Z, Liu Q.	Dox, Lgr5, PDCD5, p53			Anti-proliferation and anti-metastatic effects of sevoflurane on human osteosarcoma U2OS and Saos-2 cells.	/pubmed/30974101	Gao K, Su Z, Liu H, Liu Y.	IGF-1, PI3K/AKT			Hypoxia-induced cancer stemness acquisition is associated with CXCR4 activation by its aberrant promoter demethylation.	/pubmed/30760238	Kang N, Choi SY, Kim BN, Yeo CD, Park CK, Kim YK, Kim TJ, Lee SB, Lee SH, Park JY, Park MS, Yim HW, Kim SJ.	CXCR4
							Dynamics of BMP and Hes1/Hairy1 signaling in the dorsal neural tube underlies the transition from neural crest to definitive roof plate.	/pubmed/27012662	Nitzan E, Avraham O, Kahane N, Ofek S, Kumar D, Kalcheim C.	BMP, Hes1, Hairy1			Inhibition of growth, migration and invasion of human bladder cancer cells by antrocin, a sesquiterpene lactone isolated from Antrodia cinnamomea, and its molecular mechanisms.	/pubmed/26679052	Chiu KY, Wu CC, Chia CH, Hsu SL, Tzeng YM.	Foxd3; HES1; Hairy1;		Inhibition of pancreatic cancer stem cell characteristics by Ô±-Mangostin: Molecular mechanisms involving Sonic hedgehog and Nanog.	/pubmed/30712329	Ma Y, Yu W, Shrivastava A, Srivastava RK, Shankar S.	Nanog, Oct4, c-Myc, Sox-2 and KLF4, Cdk2, Cdk6, FGF4, c-Myc and α-Mangostin				Metastasis is impaired by endothelial-specific Dll4 loss-of-function through inhibition of epithelial-to-mesenchymal transition and reduction of cancer stem cells and circulating tumor cells.	/pubmed/31119445	Mendon’_a L, Trindade A, Carvalho C, Correia J, Badenes M, Gigante J, Duarte A.	Dll4				lncRNA KIAA0125 functions as a tumor suppressor modulating growth and metastasis of colorectal cancer via Wnt/Ô_-catenin pathway.	/pubmed/31228314	Yang Y, Zhao Y, Hu N, Zhao J, Bai Y.	lncRNA KIAA0125			High Glucose Concentrations Negatively Regulate the IGF1R/Src/ERK Axis through the MicroRNA-9 in Colorectal Cancer.	/pubmed/30965609	Chen YC, Ou MC, Fang CW, Lee TH, Tzeng SL.	IGF1R/Src			Axl kinase drives immune checkpoint and chemokine signalling pathways in lung adenocarcinomas.	/pubmed/30744655	Tsukita Y, Fujino N, Miyauchi E, Saito R, Fujishima F, Itakura K, Kyogoku Y, Okutomo K, Yamada M, Okazaki T, Sugiura H, Inoue A, Okada Y, Ichinose M.	CXCR6, PD-L1, EGFR
Notch							The Wnt Co-Receptor Lrp5 Is Required for Cranial Neural Crest Cell Migration in Zebrafish.	/pubmed/26121341	Willems B, Tao S, Yu T, Huysseune A, Witten PE, Winkler C.	Lrp5			Epstein-Barr virus LMP1 induces focal adhesions and epithelial cell migration through effects on integrin-ë±5 and N-cadherin.	/pubmed/26479443	Wasil LR, Shair KH.	LMP1, integrin-αV, n-cadherin		SOX2 knockdown inhibits the migration and invasion of basal cell carcinoma cells by targeting the SRPK1-mediated PI3K/AKT signaling pathway.	/pubmed/30675221	Li ZR, Jiang Y, Hu JZ, Chen Y, Liu QZ.	Sox-2, P13/AKT				Transcriptomic Characterization, Chemosensitivity and Regulatory Effects of Exosomes in Spontaneous EMT/MET Transitions of Breast Cancer Cells.	/pubmed/31018947	Bigagli E, Cinci L, D'Ambrosio M, Luceri C.	LGR5, FZD10, DTX1, ErbB3, FTH1 and DLL4				IQGAP1 promotes pancreatic cancer progression and epithelial-mesenchymal transition (EMT) through Wnt/Ô_-catenin signaling.	/pubmed/31101875	Hu W, Wang Z, Zhang S, Lu X, Wu J, Yu K, Ji A, Lu W, Wang Z, Wu J, Jiang C.	IQGAP1, PDAC, DVL2			Changes in the Metastatic Properties of MDA-MB-231 Cells after IGFBP6 Gene Knockdown Is Associated with Increased Expression of miRNA Genes Controlling INSR, IGF1R, and CCND1 Genes.	/pubmed/30903488	Poloznikov AA, Nikulin SV, Raigorodskaya MP, Fomicheva KA, Zakharova GS, Makarova YA, Alekseev BY.	IGF2, IGF1R, INSR, and CCND1, IGFBP6			CXCL12/CXCR4 promotes inflammation-driven colorectal cancer progression through activation of RhoA signaling by sponging miR-133a-3p.	/pubmed/30678736	Yu X, Wang D, Wang X, Sun S, Zhang Y, Wang S, Miao R, Xu X, Qu X.	CXCL12/CXCR4 , miR-133a-3p
Title	URL	Description	Gene(s)				Cadherin-6B is required for the generation of Islet-1-expressing dorsal interneurons.	/pubmed/25747715	Park KS, Gumbiner BM.	Cadherin-6B			Epithelial-to-mesenchymal transition (EMT) induced by inflammatory priming elicits mesenchymal stromal cell-like immune-modulatory properties in cancer cells.	/pubmed/25668006	Ricciardi M, Zanotto M, Malpeli G, Bassi G, Perbellini O, Chilosi M, Bifari F, Krampera M.	Fas		Abnormally elevated USP37 expression in breast cancer stem cells regulates stemness, epithelial-mesenchymal transition and cisplatin sensitivity.	/pubmed/30482232	Qin T, Li B, Feng X, Fan S, Liu L, Liu D, Mao J, Lu Y, Yang J, Yu X, Zhang Q, Zhang J, Song B, Li M, Li L.	USP37				Role of Jagged1/STAT3 signalling in platinum-resistant ovarian cancer.	/pubmed/30993885	Yang J, Xing H, Lu D, Wang J, Li B, Tang J, Gu F, Hong L.	STAT3 , JAK, Notch1, Notch2				SOX9 drives the epithelial-mesenchymal transition in non-small-cell lung cancer through the Wnt/Ô_-catenin pathway.	/pubmed/31060551	Huang JQ, Wei FK, Xu XL, Ye SX, Song JW, Ding PK, Zhu J, Li HF, Luo XP, Gong H, Su L, Yang L, Gong LY.	SOX9, GSK3β			TRPM7 promotes the epithelial-mesenchymal transition in ovarian cancer through the calcium-related PI3K / AKT oncogenic signaling.	/pubmed/30819230	Liu L, Wu N, Wang Y, Zhang X, Xia B, Tang J, Cai J, Zhao Z, Liao Q, Wang J.	TRPM7			Frizzled 2-induced epithelial-mesenchymal transition correlates with vasculogenic mimicry, stemness, and Hippo signaling in hepatocellular carcinoma.	/pubmed/30677195	Ou H, Chen Z, Xiang L, Fang Y, Xu Y, Liu Q, Hu Z, Li X, Huang Y, Yang D.	FZD2
Zebrafish snai2 mutants fail to phenocopy morphant phenotypes.	/pubmed/30208064	Bickers C, EspaÌ±ola SD, Grainger S, Pouget C, Traver D.	Notch1, Snail2				LIF-JAK1-STAT3 signaling delays contact inhibition of human corneal endothelial cells.	/pubmed/25695744	Liu X, Tseng SC, Zhang MC, Chen SY, Tighe S, Lu WJ, Zhu YT.	JAK1,LEF1,STAT3			CD95 promotes metastatic spread via Sck in pancreatic ductal adenocarcinoma.	/pubmed/25613377	Teodorczyk M, Kleber S, Wollny D, Sefrin JP, Aykut B, Mateos A, Herhaus P, Sancho-Martinez I, Hill O, Gieffers C, Sykora J, Weichert W, Eisen C, Trumpp A, Sprick MR, Bergmann F, Welsch T, Martin-Villalba A.	CD95L		Downregulation of ASPP2 promotes gallbladder cancer metastasis and macrophage recruitment via aPKC-Ô_/GLI1 pathway.	/pubmed/30389910	Tian L, Deng Z, Xu L, Yang T, Yao W, Ji L, Lu Y, Zhang J, Liu Y, Wang J.	ASPP2, (CCL) 2, CCL5,				Knockdown of Delta-like 3 restricts lipopolysaccharide-induced inflammation, migration and invasion of A2058 melanoma cells via blocking Twist1-mediated epithelial-mesenchymal transition.	/pubmed/30981764	Ding X, Li F, Zhang L.	DLL3, MMP1, MMP9, VEGF, DLL3, TNF-α and IL-6				Loss of G3BP1 suppresses proliferation, migration, and invasion of esophageal cancer cells via Wnt/Ô_-catenin and PI3K/AKT signaling pathways.	/pubmed/30989663	Zhang LN, Zhao L, Yan XL, Huang YH.	G3BP1, c-Myc, Axin2, and cyclin D1, PI3K, AKT			Activation of IGF/IGF-IR signaling pathway fails to induce epithelial-mesenchymal transition in pancreatic cancer cells.	/pubmed/30799278	Kopantzev EP, Kopantseva MR, Grankina EV, Mikaelyan A, Egorov VI, Sverdlov ED.	IGF-I/IGF-IR			CCL18 enhances migration, invasion and EMT by binding CCR8 in bladder cancer cells.	/pubmed/30592282	Liu X, Xu X, Deng W, Huang M, Wu Y, Zhou Z, Zhu K, Wang Y, Cheng X, Zhou X, Chen L, Li Y, Wang G, Fu B.	CCL18 , MMP‑2, VEGF‑C
Cytoplasmic NOTCH and membrane-derived ë_-catenin link cell fate choice to epithelial-mesenchymal transition during myogenesis.	/pubmed/27218451	Sieiro D, Rios AC, Hirst CE, Marcelle C.	NOTCH, GSK-3β, SNAI1, β-catenin				Neural crest specification by inhibition of the ROCK/Myosin II pathway.	/pubmed/25346532	Kim K, Ossipova O, Sokol SY.	Myosin II			Fas signaling promotes chemoresistance in gastrointestinal cancer by up-regulating P-glycoprotein.	/pubmed/25333257	Zheng H, Liu Z, Liu T, Cai Y, Wang Y, Lin S, Chen J, Wang J, Wang Z, Jiang B.	FaslL, b-catenin		Phosphatidylethanolamine-binding protein 4 promotes the epithelial-to-mesenchymal transition in non-small cell lung cancer cells by activating the sonic hedgehog signaling pathway.	/pubmed/30367510	Jian W, Bai Y, Li X, Kang J, Lei Y, Xue Y.	PEBP4				Discrimination of low- and high-grade appendiceal mucinous neoplasms by targeted sequencing of cancer-related variants.	/pubmed/30962504	LaFramboise WA, Pai RK, Petrosko P, Belsky MA, Dhir A, Howard PG, Becich MJ, Holtzman MP, Ahrendt SA, Pingpank JF, Zeh HJ, Dhir R, Bartlett DL, Choudry HA.	catenin β1; notch receptor 1 and 4, MYC, DAXX, TP53, WNT, NOTCH, RAS/ERK/PI3K, PTEN, NF-қB				Discrimination of low- and high-grade appendiceal mucinous neoplasms by targeted sequencing of cancer-related variants.	/pubmed/30962504	LaFramboise WA, Pai RK, Petrosko P, Belsky MA, Dhir A, Howard PG, Becich MJ, Holtzman MP, Ahrendt SA, Pingpank JF, Zeh HJ, Dhir R, Bartlett DL, Choudry HA.	p53, PTEN, and NF-қB , MYC and DAXX			Targeting the insulin-like growth factor-1 receptor in MTAP-deficient renal cell carcinoma.	/pubmed/30701095	Xu J, Chang WH, Fong LWR, Weiss RH, Yu SL, Chen CH.	Src and STAT3			Tspan8 and Tspan8/CD151 knockout mice unravel the contribution of tumor and host exosomes to tumor progression.	/pubmed/30541597	Zhao K, Wang Z, Hackert T, Pitzer C, Z’_ller M.	Tspan8 and CD151
Sox2 acts as a rheostat of epithelial to mesenchymal transition during neural crest development.	/pubmed/25309446	Mandalos N, Rhinn M, Granchi Z, Karampelas I, Mitsiadis T, Economides AN, DollÌ© P, Remboutsika E.	Sox2				Bmp signaling represses Vegfa to promote outflow tract cushion development.	/pubmed/23863481	Bai Y, Wang J, Morikawa Y, Bonilla-Claudio M, Klysik E, Martin JF.	Bmp4/7			Downregulation of ceramide synthase-6 during epithelial-to-mesenchymal transition reduces plasma membrane fluidity and cancer cell motility.	/pubmed/24632610	Edmond V, Dufour F, Poiroux G, Shoji K, Malleter M, FouquÌ© A, Tauzin S, Rimokh R, Sergent O, Penna A, Dupuy A, Levade T, Theret N, Micheau O, SÌ©gui B, Legembre P.	CD95L, CerS6		MicroRNA-122 negatively associates with peroxiredoxin-II expression in human gefitinib-resistant lung cancer stem cells.	/pubmed/30341415	Chandimali N, Huynh DL, Zhang JJ, Lee JC, Yu DY, Jeong DK, Kwon T.	Prx II, MiR-122				MCUR1 facilitates epithelial-mesenchymal transition and metastasis via the mitochondrial calcium dependent ROS/Nrf2/Notch pathway in hepatocellular carcinoma.	/pubmed/30909929	Jin M, Wang J, Ji X, Cao H, Zhu J, Chen Y, Yang J, Zhao Z, Ren T, Xing J.	ROS/Nrf2/Notch1				MiR-125b regulates the proliferation and metastasis of triple negative breast cancer cells via the Wnt/Ô_-catenin pathway and EMT.	/pubmed/30950326	Nie J, Jiang HC, Zhou YC, Jiang B, He WJ, Wang YF, Dong J.	miR-125b			CYR61 triggers osteosarcoma metastatic spreading via an IGF1RÔ_-dependent EMT-like process.	/pubmed/30642298	Habel N, Stefanovska B, Car’åne D, Pati’±o-Garcia A, Lecanda F, Fromigu’© O.	CYR61/CCN1			Activation of GPR120 promotes the metastasis of breast cancer through the PI3K/Akt/NF-Ô_B signaling pathway.	/pubmed/30520776	Zhang M, Qiu S.	GPR120
Anterior Hox genes interact with components of the neural crest specification network to induce neural crest fates.	/pubmed/21433221	Gouti M, Briscoe J, Gavalas A.	HOX (ant)				Non-invasive neural stem cells become invasive in vitro by combined FGF2 and BMP4 signaling.	/pubmed/23788430	Sailer MH, Gerber A, Tostado C, Hutter G, Cordier D, Mariani L, Ritz MF.	FGF2, BMP4			miR-23a inhibits E-cadherin expression and is regulated by AP-1 and NFAT4 complex during Fas-induced EMT in gastrointestinal cancer.	/pubmed/23929433	Zheng H, Li W, Wang Y, Xie T, Cai Y, Wang Z, Jiang B.	FaslL, e-cadherin		GLI1 promotes cancer stemness through intracellular signaling pathway PI3K/Akt/NFÔ_B in colorectal adenocarcinoma.	/pubmed/30321514	Yang Z, Zhang C, Qi W, Cui Y, Xuan Y.	PI3K/Akt/NFκB, SOX9 and CD133, QZN, GANT-61				MFAP5 promotes basal-like breast cancer progression by activating the EMT program.	/pubmed/30899449	Wu Y, Wu P, Zhang Q, Chen W, Liu X, Zheng W.	MFAP5				Aspirin inhibits colon cancer cell line migration through regulating epithelial-mesenchymal transition via Wnt signaling.	/pubmed/30944655	Jin S, Wu X.	E-box binding homeobox 1			Long noncoding RNA HOTAIR silencing inhibits invasion and proliferation of human colon cancer LoVo cells via regulating IGF2BP2.	/pubmed/30335892	Wu XL, Lu RY, Wang LK, Wang YY, Dai YJ, Wang CY, Yang YJ, Guo F, Xue J, Yang DD.	HOTAIR, IGF2BP2, E-cadherin, and vimentin			Galectin-1 Promotes Metastasis in Gastric Cancer Through a Sphingosine-1-Phosphate Receptor 1-Dependent Mechanism.	/pubmed/30453284	You X, Wang Y, Wu J, Liu Q, Chen D, Tang D, Wang D.	S1PR1, Gal-1
Adult epidermal Notch activity induces dermal accumulation of T cells and neural crest derivatives through upregulation of jagged 1.	/pubmed/20940224	Ambler CA, Watt FM.	NOTCH, JAGGED-1				The chick embryo as an experimental system for melanoma cell invasion.	/pubmed/23342051	Busch C, Krochmann J, Drews U.	TGF-B, BMP4, Nodal			Glycogen synthase kinase-3 beta regulates Snail and ë_-catenin expression during Fas-induced epithelial-mesenchymal transition in gastrointestinal cancer.	/pubmed/23582741	Zheng H, Li W, Wang Y, Liu Z, Cai Y, Xie T, Shi M, Wang Z, Jiang B.	GSK-3β, Snail, β-catenin		Hypoxia-induced TUFT1 promotes the growth and metastasis of hepatocellular carcinoma by activating the Ca(2+)/PI3K/AKT pathway.	/pubmed/30250300	Dou C, Zhou Z, Xu Q, Liu Z, Zeng Y, Wang Y, Li Q, Wang L, Yang W, Liu Q, Tu K.	TUFT1, HIF-1α, Ca2+				Hypomethylation-mediated activation of cancer/testis antigen KK-LC-1 facilitates hepatocellular carcinoma progression through activating the Notch1/Hes1 signalling.	/pubmed/30895661	Chen Z, Zuo X, Pu L, Zhang Y, Han G, Zhang L, Wu Z, You W, Qin J, Dai X, Shen H, Wang X, Wu J.	KK-LC-1, presenilin-1/Notch1/Hes1				MiR-1246 Promotes Metastasis and Invasion of A549 cells by Targeting GSK-3Ô_Š—êMediated Wnt/Ô_-Catenin Pathway.	/pubmed/30913872	Yang F, Xiong H, Duan L, Li Q, Li X, Zhou Y.	miR-1246, GSK-3β			Hypoxia-inducible transgelin 2 selects epithelial-to-mesenchymal transition and Ô_-radiation-resistant subtypes by focal adhesion kinase-associated insulin-like growth factor 1 receptor activation in non-small-cell lung cancer cells.	/pubmed/30191639	Kim IG, Lee JH, Kim SY, Hwang HM, Kim TR, Cho EW.	TAGLN2, GSK3β, Snail1			G-protein-coupled estrogen receptor suppresses the migration of osteosarcoma cells via post-translational regulation of Snail.	/pubmed/30341688	Wang Z, Chen X, Zhao Y, Jin Y, Zheng J.	GPER, FBXL5, Snail
Snail-regulated genes in malignant melanoma.	/pubmed/16034310	Kuphal S, Palm HG, Poser I, Bosserhoff AK.	Snail, E-cadherin. MMP-2, EMMPRIN, SPARC, TIMP-1, t-PA, RhoA, Notch4, integrin beta3, NM23b, RhoB				Cadherin-6B stimulates an epithelial mesenchymal transition and the delamination of cells from the neural ectoderm via LIMK/cofilin mediated non-canonical BMP receptor signaling.	/pubmed/22537493	Park KS, Gumbiner BM.	cadherin-6B or BMP. LIMK1			NPV-LDE-225 (Erismodegib) inhibits epithelial mesenchymal transition and self-renewal of glioblastoma initiating cells by regulating miR-21, miR-128, and miR-200.	/pubmed/23482671	Fu J, Rodova M, Nanta R, Meeker D, Van Veldhuizen PJ, Srivastava RK, Shankar S.	(TRAIL)-R1/DR4, TRAIL-R2/DR5,FasL		The Lim1 oncogene as a new therapeutic target for metastatic human renal cell carcinoma.	/pubmed/30076415	Hamaidi I, Coquard C, Danilin S, Dormoy V, B’©raud C, Rothhut S, Barthelmebs M, Benkirane-Jessel N, Lindner V, Lang H, Massfelder T.	Lim1, paxillin and fibronectin, Twist1/2 and snail, MMP1/2/3/8/9, CXCR4, SDF-1, and ANG-1				Genome-wide analysis reveals miR-3184-5p and miR-181c-3p as a critical regulator for adipocytes-associated breast cancer.	/pubmed/30847933	Rajarajan D, Selvarajan S, Charan Raja MR, Kar Mahapatra S, Kasiappan R.	miR-181c-3p, miR-3184-5p				GSK3Ô_ regulates epithelial-mesenchymal transition and cancer stem cell properties in triple-negative breast cancer.	/pubmed/30845991	Vijay GV, Zhao N, Den Hollander P, Toneff MJ, Joseph R, Pietila M, Taube JH, Sarkar TR, Ramirez-Pena E, Werden SJ, Shariati M, Gao R, Sobieski M, Stephan CC, Sphyris N, Miura N, Davies P, Chang JT, Soundararajan R, Rosen JM, Mani SA.	GSK3β, TWS119 and LiCl			IGFBP7 is associated to prognosis and could suppress cell survival in cholangiocarcinoma.	/pubmed/29991293	Yue C, Yang M, Tian Q, Mo F, Peng J, Ma Y, Huang Y, Wang D, Wang Y, Hu Z.	IGFBP7			Protease-activated receptor 2 induces migration and promotes Slug-mediated epithelial-mesenchymal transition in lung adenocarcinoma cells.	/pubmed/30321617	Tsai CC, Chou YT, Fu HW.	PAR2, p38, MAPK
							Geminin is required for epithelial to mesenchymal transition at gastrulation.	/pubmed/22335560	Emmett LS, O'Shea KS.	Axin2, Msx2, Bmp4, Neurog1, E-cadherin,			Keratin 8 and 18 loss in epithelial cancer cells increases collective cell migration and cisplatin sensitivity through claudin1 up-regulation.	/pubmed/31189369	Fortier AM, Asselin E, Cadrin M.	K8,K18		Forkhead-box R2 promotes metastasis and growth by stimulating angiogenesis and activating hedgehog signaling pathway in ovarian cancer.	/pubmed/29943836	Li B, Huang W, Cao N, Lou G.	FoxR2				Ti(0.8)O(2) Nanosheets Inhibit Lung Cancer Stem Cells by Inducing Production of Superoxide Anion.	/pubmed/30737252	Petpiroon N, Bhummaphan N, Soonnarong R, Chantarawong W, Maluangnont T, Pongrakhananon V, Chanvorachote P.	CD133 and ALDH1A1, Nanog and Oct-4				TRIM29 facilitates the epithelial-to-mesenchymal transition and the progression of colorectal cancer via the activation of the Wnt/Ô_-catenin signaling pathway.	/pubmed/30813948	Sun J, Zhang T, Cheng M, Hong L, Zhang C, Xie M, Sun P, Fan R, Wang Z, Wang L, Zhong J.	TRIM29 and β-catenin			Insulin-like growth factor-1 induces epithelial-mesenchymal transition in hepatocellular carcinoma by activating survivin.	/pubmed/29989646	Liu F, Sun Y, Liu B, Lu J, Li H, Zhu H, Gao H, Zhou X, Chang H.	IGF-1			Characterisation of mesenchymal colon tumour-derived cells in tumourspheres as a model for colorectal cancer progression.	/pubmed/30272331	Turano M, Costabile V, Cerasuolo A, Duraturo F, Liccardo R, Delrio P, Pace U, Rega D, Dodaro CA, Milone M, Izzo P, De Rosa M.	GSK-3β, LGR5, ALDH1, CD133 and CD44v6
							Role of epithelial-stem cell interactions during dental cell differentiation.	/pubmed/22298769	Arakaki M, Ishikawa M, Nakamura T, Iwamoto T, Yamada A, Fukumoto E, Saito M, Otsu K, Harada H, Yamada Y, Fukumoto S.	BMP2,BMP4, Noggin			GANT-61 inhibits pancreatic cancer stem cell growth in vitro and in NOD/SCID/IL2R gamma null mice xenograft.	/pubmed/23200667	Fu J, Rodova M, Roy SK, Sharma J, Singh KP, Srivastava RK, Shankar S.	GANT-61		Simvastatin inhibits sonic hedgehog signaling and stemness features of pancreatic cancer.	/pubmed/29627496	Yin Y, Liu L, Zhao Z, Yin L, Bauer N, Nwaeburu CC, Gladkich J, Gross W, Hackert T, Sticht C, Gretz N, Strobel O, Herr I.	cMet, CxCR4 and Vimentin				MAML1 regulates EMT markers expression through NOTCH-independent pathway in breast cancer cell line MCF7.	/pubmed/30732857	Shariat Razavi SM, Forghanifard MM, Kordi-Tamandani DM, Abbaszadegan MR.	MAML1				Loss of MADD expression inhibits cellular growth and metastasis in anaplastic thyroid cancer.	/pubmed/30760700	Saini S, Sripada L, Tulla K, Kumar P, Yue F, Kunda N, Maker AV, Prabhakar BS.	MADD, TNFα/ERK/GSK3β			FOXC1 plays a crucial role in the growth of pancreatic cancer.	/pubmed/29976975	Subramani R, Camacho FA, Levin CI, Flores K, Clift A, Galvez A, Terres M, Rivera S, Kolli SN, Dodderer J, Miranda M, Rodriguez A, Pedroza DA, Chatterjee A, Lakshmanaswamy R.	IGF-1R and FOXC1			CXCR7 is not obligatory for CXCL12-CXCR4-induced epithelial-mesenchymal transition in human ovarian cancer.	/pubmed/30259564	Zheng N, Liu W, Chen J, Li B, Liu J, Wang J, Gao Y, Shao J, Jia L.	CXCR7, CXCL12-CXCR4
Wnt							FGF and retinoic acid activity gradients control the timing of neural crest cell emigration in the trunk.	/pubmed/21807879	MartÌ_nez-Morales PL, Diez del Corral R, Olivera-MartÌ_nez I, Quiroga AC, Das RM, Barbas JA, Storey KG, Morales AV.	FGF, Snail2			Fas-associated factor 1 is a scaffold protein that promotes ë_-transducin repeat-containing protein (ë_-TrCP)-mediated ë_-catenin ubiquitination and degradation.	/pubmed/22730322	Zhang L, Zhou F, Li Y, Drabsch Y, Zhang J, van Dam H, ten Dijke P.	β-catenin,FAF1, E-cadherin		Gli is activated and promotes epithelial-mesenchymal transition in human esophageal adenocarcinoma.	/pubmed/29416661	Wang L, Jin JQ, Zhou Y, Tian Z, Jablons DM, He B.	E-cadherin, N-cadherin, Vimentin, β-catenin, Snail, and Slug				LncRNA UCA1/miR-124 axis modulates TGFÔ_1-induced epithelial-mesenchymal transition and invasion of tongue cancer cells through JAG1/Notch signaling.	/pubmed/30635938	Zhang TH, Liang LZ, Liu XL, Wu JN, Su K, Chen JY, Zheng QY.	UCA1 and JAG1				Wnt7a predicts poor prognosis, and contributes to growth and metastasis in tongue squamous cell carcinoma.	/pubmed/30747225	Jia B, Qiu X, Chu H, Sun X, Xu S, Zhao X, Zhao J.	Wnt7a			Promotion of Insulin-like growth factor II in cell proliferation and epithelial-mesenchymal transition in hepatocellular carcinoma.	/pubmed/29970663	Ma Y, Chen Y, Chen L, Liu Z, Ieong ML, Gao F, Huang W.	IGF-II			Overexpression of CXCR4 synergizes with LL-37 in the metastasis of breast cancer cells.	/pubmed/30251699	Pan WL, Wang Y, Hao Y, Wong JH, Chan WC, Wan DC, Ng TB.	CXCR4 , LL-37
Title	URL	Description	Gene(s)				Anterior Hox genes interact with components of the neural crest specification network to induce neural crest fates.	/pubmed/21433221	Gouti M, Briscoe J, Gavalas A.	Hoxa1, Hoxb1			Upregulation of SATB1 promotes tumor growth and metastasis in liver cancer.	/pubmed/22583549	Tu W, Luo M, Wang Z, Yan W, Xia Y, Deng H, He J, Han P, Tian D.	SATB1,CDK4,Snail1, Slug, Twist and vimentin, E-cadherin		The targeted regulation of Gli1 by miR-361 to inhibit epithelia-mesenchymal transition and invasion of esophageal carcinoma cells.	/pubmed/29125483	Lin P, Pang Q, Wang P, Lv X, Liu L, Li A.	MiR-361, E-cadherin, Gli1				Delta-like 1 homologue promotes tumorigenesis and epithelial-mesenchymal transition of ovarian high-grade serous carcinoma through activation of Notch signaling.	/pubmed/30626939	Huang CC, Cheng SH, Wu CH, Li WY, Wang JS, Kung ML, Chu TH, Huang ST, Feng CT, Huang SC, Tai MH.	DLK1				WNT1-inducible signaling pathway protein 1 (WISP1/CCN4) stimulates melanoma invasion and metastasis by promoting the epithelial-mesenchymal transition.	/pubmed/30723155	Deng W, Fernandez A, McLaughlin SL, Klinke DJ 2nd.	WISP1, SNAI1			Long noncoding RNA PVT1 enhances the viability and invasion of papillary thyroid carcinoma cells by functioning as ceRNA of microRNA-30a through mediating expression of insulin like growth factor 1 receptor.	/pubmed/29803929	Feng K, Liu Y, Xu LJ, Zhao LF, Jia CW, Xu MY.	PVT1, miR-30a and IGF1R			Upregulated FFAR4 correlates with the epithelial-mesenchymal transition and an unfavorable prognosis in human cholangiocarcinoma.	/pubmed/30248044	Meng FT, Huang M, Shao F, Huang Q.	FFAR4, E-cadherin, vimentin, Snail-1, CK7 and CK19
YAP promotes neural crest emigration through interactions with BMP and Wnt activities.	/pubmed/31228951	Kumar D, Nitzan E, Kalcheim C.	YAP, BMP,Wnt				Cadherin 6B induces BMP signaling and de-epithelialization during the epithelial mesenchymal transition of the neural crest.	/pubmed/20610481	Park KS, Gumbiner BM.	cadherin 6B,			Fas signaling promotes motility and metastasis through epithelial-mesenchymal transition in gastrointestinal cancer.	/pubmed/22508480	Zheng HX, Cai YD, Wang YD, Cui XB, Xie TT, Li WJ, Peng L, Zhang Y, Wang ZQ, Wang J, Jiang B.	Fas,Snail,Twist		CCL2/CCR2 axis induces hepatocellular carcinoma invasion and epithelial-mesenchymal transition inÎ¾vitro through activation of the Hedgehog pathway.	/pubmed/29115520	Zhuang H, Cao G, Kou C, Liu T.	CCL2/CCR2, SMO				Toward understanding cancer stem cell heterogeneity in the tumor microenvironment.	/pubmed/30587589	Bocci F, Gearhart-Serna L, Boareto M, Ribeiro M, Ben-Jacob E, Devi GR, Levine H, Onuchic JN, Jolly MK.	JAG1				miR-22 and miR-214 targeting BCL9L inhibit proliferation, metastasis, and epithelial-mesenchymal transition by down-regulating Wnt signaling in colon cancer.	/pubmed/30698996	Sun R, Liu Z, Han L, Yang Y, Wu F, Jiang Q, Zhang H, Ma R, Miao J, He K, Wang X, Zhou D, Huang C.	miR-22 and miR-214, BCL9L			The IGF2/IR/IGF1R Pathway in Tumor Cells and Myofibroblasts Mediates Resistance to EGFR Inhibition in Cholangiocarcinoma.	/pubmed/29716918	Vaquero J, Lobe C, Tahraoui S, Clap’©ron A, Mergey M, Merabtene F, Wendum D, Coulouarn C, Housset C, Desbois-Mouthon C, Praz F, Fouassier L.	EGFR, IGF2			MicroRNA-135a-3p is downregulated and serves as a tumour suppressor in ovarian cancer by targeting CCR2.	/pubmed/30138893	Duan S, Dong X, Hai J, Jiang J, Wang W, Yang J, Zhang W, Chen C.	CCR2, miR-135a-3p
Draxin alters laminin organization during basement membrane remodeling to control cranial neural crest EMT.	/pubmed/30579765	Hutchins EJ, Bronner ME.	Draxin, Wnt				A negative modulatory role for rho and rho-associated kinase signaling in delamination of neural crest cells.	/pubmed/18945340	Groysman M, Shoval I, Kalcheim C.	BMP4			Osteopontin regulates epithelial mesenchymal transition-associated growth of hepatocellular cancer in a mouse xenograft model.	/pubmed/22241292	Bhattacharya SD, Mi Z, Kim VM, Guo H, Talbot LJ, Kuo PC.	OPN		Lung regeneration after toxic injury is improved in absence of dioxin receptor.	/pubmed/29107893	Morales-Hern’ndez A, Nacarino-Palma A, Moreno-Mar’_n N, Barrasa E, Paniagua-Qui’±ones B, Catalina-Fern’ndez I, Alvarez-Barrientos A, Bustelo XR, Merino JM, Fern’ndez-Salguero PM.	NANOG and OCT4				MicroRNA-539 inhibits the progression of Wilms' Tumor through downregulation of JAG1 and Notch1/3.	/pubmed/30530967	Su H, Wang X, Song J, Wang Y, Zhao Y, Meng J.	E-cadherin, N-cadherin, Vimentin, Notch 1, Notch 3 and JAG1				The miR-29c-KIAA1199 axis regulates gastric cancer migration by binding with WBP11 and PTP4A3.	/pubmed/30626935	Wang L, Yu T, Li W, Li M, Zuo Q, Zou Q, Xiao B.	miR-29c-KIAA1199, WBP11 and PTP4A3.			Disruption of IGFŠ—•1R signaling by a novel quinazoline derivative, HMJŠ—•30, inhibits invasiveness and reverses epithelial-mesenchymal transition in osteosarcoma UŠ—•2 OS cells.	/pubmed/29568964	Chiu YJ, Hour MJ, Jin YA, Lu CC, Tsai FJ, Chen TL, Ma H, Juan YN, Yang JS.	TIMP‑1 and TIMP‑2, MMP‑2 and MMP-9, HMJ‑30			CŠ—•C chemokine receptor typeÎ¾2 promotes epithelialŠ—•toŠ—•mesenchymal transition by upregulating matrix metalloproteinaseŠ—•2 in human liver cancer.	/pubmed/30132565	Li H, Li H, Li XP, Zou H, Liu L, Liu W, Duan T.	CCR2, MMP2
Wnt-signaling enhances neural crest migration of melanoma cells and induces an invasive phenotype.	/pubmed/29454361	Sinnberg T, Levesque MP, Krochmann J, Cheng PF, Ikenberg K, Meraz-Torres F, Niessner H, Garbe C, Busch C.	Wnt3a				Antagonistic roles of full-length N-cadherin and its soluble BMP cleavage product in neural crest delamination.	/pubmed/17185320	Shoval I, Ludwig A, Kalcheim C.	BMP4			Tumor promoting effects of CD95 signaling in chemoresistant cells.	/pubmed/20573240	Ametller E, GarcÌ_a-Recio S, Costamagna D, Mayordomo C, FernÌÁndez-Nogueira P, CarbÌ_ N, Pastor-Arroyo EM, GascÌ_n P, Almendro V.	CD95L		Msi2 plays a carcinogenic role in esophageal squamous cell carcinoma via regulation of the Wnt/Ô_-catenin and Hedgehog signaling pathways.	/pubmed/29054489	Li Z, Jin H, Mao G, Wu L, Guo Q.	Msi2				Increased expression of lncRNA SNHG12 predicts a poor prognosis of nasopharyngeal carcinoma and regulates cell proliferation and metastasis by modulating Notch signal pathway.	/pubmed/30452404	Liu ZB, Tang C, Jin X, Liu SH, Pi W.	SNHG12				miRŠ—•498 inhibits the growth and metastasis of liver cancer by targeting ZEB2.	/pubmed/30592286	Zhang X, Xu X, Ge G, Zang X, Shao M, Zou S, Zhang Y, Mao Z, Zhang J, Mao F, Qian H, Xu W.	ZEB2, miR‑498			Suppressor of cytokine signalling-2 limits IGF1R-mediated regulation of epithelial-mesenchymal transition in lung adenocarcinoma.	/pubmed/29559623	Zhou Y, Zhang Z, Wang N, Chen J, Zhang X, Guo M, John Zhong L, Wang Q.	SOCS2, STAT3, STAT5			Overexpression of leucine-rich repeat-containing G protein-coupled receptor 5 predicts poor prognosis in hepatocellular carcinoma.	/pubmed/30108439	Chen W, Fu Q, Fang F, Fang J, Zhang Q, Hong Y.	LGR5
The Wnt Co-Receptor Lrp5 Is Required for Cranial Neural Crest Cell Migration in Zebrafish.	/pubmed/26121341	Willems B, Tao S, Yu T, Huysseune A, Witten PE, Winkler C.	Lrp5				Cooperative action of Sox9, Snail2 and PKA signaling in early neural crest development.	/pubmed/16510505	Sakai D, Suzuki T, Osumi N, Wakamatsu Y.	SOX9, Snail2			Genetic and expression alterations in association with the sarcomatous change of cholangiocarcinoma cells.	/pubmed/19287191	Yoo HJ, Yun BR, Kwon JH, Ahn HS, Seol MA, Lee MJ, Yu GR, Yu HC, Hong B, Choi K, Kim DG.	p53, FHIT, Fas/FasL, LGALS1, TGFBI, CES1, LDHB, UCHL1, ASPH, VDAC1, VIL2, CCND2, S100P, CALB1, MAL2, GPX1		Sanguinarine inhibits pancreatic cancer stem cell characteristics by inducing oxidative stress and suppressing sonic hedgehog-Gli-Nanog pathway.	/pubmed/28968696	Ma Y, Yu W, Shrivastava A, Alemi F, Lankachandra K, Srivastava RK, Shankar S.	Cdk2, Cdk6, FGF4, c-Myc and Oct4				MicroRNA-122 negatively associates with peroxiredoxin-II expression in human gefitinib-resistant lung cancer stem cells.	/pubmed/30341415	Chandimali N, Huynh DL, Zhang JJ, Lee JC, Yu DY, Jeong DK, Kwon T.	MiR-122, Prx II				Chronic cadmium exposure aggravates malignant phenotypes of nasopharyngeal carcinoma by activating the Wnt/Ô_-catenin signaling pathway via hypermethylation of the casein kinase 1Ô± promoter.	/pubmed/30588112	Peng L, Huang YT, Zhang F, Chen JY, Huo X.	F-actin, β-catenin and CK1α			Intermittent calorie restriction enhances epithelial-mesenchymal transition through the alteration of energy metabolism in a mouse tumor model.	/pubmed/29345287	Kusuoka O, Fujiwara-Tani R, Nakashima C, Fujii K, Ohmori H, Mori T, Kishi S, Miyagawa Y, Goto K, Kawahara I, Kuniyasu H.	Stat3, insulin-like growth factor-1, hypoxia-induced factor-1α			Protease-activated receptor-1 (PAR1) promotes epithelial-endothelial transition through Twist1 in hepatocellular carcinoma.	/pubmed/30081924	Xiao T, Zhang Q, Zong S, Zhong WL, Qin Y, Bi Z, Chen S, Liu HJ, Wei JJ, Zhou BJ, Wang LM, Zhou HG, Liu YR, Sun T, Yang C.	PAR1 , Twist1
SOX9 Overexpression Promotes Glioma Metastasis via Wnt/b-Catenin Signaling.	/pubmed/25716338	Liu H, Liu Z, Jiang B, Peng R, Ma Z, Lu J.	SOX-9				BMP2 and FGF2 cooperate to induce neural-crest-like fates from fetal and adult CNS stem cells.	/pubmed/16339968	Sailer MH, Hazel TG, Panchision DM, Hoeppner DJ, Schwab ME, McKay RD.	BMP2								Low folate metabolic stress reprograms DNA methylation-activated sonic hedgehog signaling to mediate cancer stem cell-like signatures and invasive tumour stage-specific malignancy of human colorectal cancers.	/pubmed/28833104	Feng HC, Lin JY, Hsu SH, Lan WY, Kuo CS, Tian YF, Sun DP, Huang RS.	SOX2, NANOG and OCT4, sonic hedgehog (Shh),				Lipophilic statins antagonistically alter the major epithelial-to-mesenchymal transition signaling pathways in breast cancer stem-like cells via inhibition of the mevalonate pathway.	/pubmed/30191610	Koohestanimobarhan S, Salami S, Imeni V, Mohammadi Z, Bayat O.	CD24, CD44				Semaphorin-5A maintains epithelial phenotype of malignant pancreatic cancer cells.	/pubmed/30577767	Saxena S, Purohit A, Varney ML, Hayashi Y, Singh RK.	SEMA5A			IMP2 and IMP3 cooperate to promote the metastasis of triple-negative breast cancer through destabilization of progesterone receptor.	/pubmed/29217458	Kim HY, Ha Thi HT, Hong S.	IMP2 and IMP3			GPR56 promotes proliferation of colorectal cancer cells and enhances metastasis via epithelialŠ—•mesenchymal transition through PI3K/AKT signaling activation.	/pubmed/30066935	Ji B, Feng Y, Sun Y, Ji D, Qian W, Zhang Z, Wang Q, Zhang Y, Zhang C, Sun Y.	GPR56, PI3K/AKT
Rabconnectin-3a regulates vesicle endocytosis and canonical Wnt signaling in zebrafish neural crest migration.	/pubmed/24802872	Tuttle AM, Hoffman TL, Schilling TF.	Rbc3a, Atp6v0a1				Transcription factor c-Myb is involved in the regulation of the epithelial-mesenchymal transition in the avian neural crest.	/pubmed/16231084	Karafiat V, Dvorakova M, Krejci E, Kralova J, Pajer P, Snajdr P, Mandikova S, Bartunek P, Grim M, Dvorak M.	BMP4, msx1,slug, c-Myb								CHSY1 promotes aggressive phenotypes of hepatocellular carcinoma cells via activation of the hedgehog signaling pathway.	/pubmed/28652022	Liu CH, Lan CT, Chou JF, Tseng TJ, Liao WC.	hondroitin sulfate synthase 1 (CHSY1),				NOTCH3 expression is linked to breast cancer seeding and distant metastasis.	/pubmed/30180881	Leontovich AA, Jalalirad M, Salisbury JL, Mills L, Haddox C, Schroeder M, Tuma A, Guicciardi ME, Zammataro L, Gambino MW, Amato A, Di Leonardo A, McCubrey J, Lange CA, Liu M, Haddad T, Goetz M, Boughey J, Sarkaria J, Wang L, Ingle JN, Galanis E, et al.	NOTCH3 , MAPK, AURKA				High PLK4 expression promotes tumor progression and induces epithelialŠ—•mesenchymal transition by regulating the Wnt/Ô_Š—•catenin signaling pathway in colorectal cancer.	/pubmed/30570110	Liao Z, Zhang H, Fan P, Huang Q, Dong K, Qi Y, Song J, Chen L, Liang H, Chen X, Zhang Z, Zhang B.	PLK4			Material-induced Senescence (MIS): Fluidity Induces Senescent Type Cell Death of Lung Cancer Cells via Insulin-Like Growth Factor Binding Protein 5.	/pubmed/29187894	Mano SS, Uto K, Ebara M.	IGFBP5			Bulk tumour cell migration in lung carcinomas might be more common than epithelial-mesenchymal transition and be differently regulated.	/pubmed/29976164	Zacharias M, Brcic L, Eidenhammer S, Popper H.	TGFβ1, Twist, vimentin, fascin, Mad, Brk, Tsk5, Rab40B, ERK1/2 and PLCγ
Activity of the RhoU/Wrch1 GTPase is critical for cranial neural crest cell migration.	/pubmed/21156169	Fort P, GuÌ©mar L, Vignal E, Morin N, Notarnicola C, de Santa Barbara P, Faure S.	rhoU/wrch1				Regulation of Slug transcription in embryonic ectoderm by beta-catenin-Lef/Tcf and BMP-Smad signaling.	/pubmed/16179074	Sakai D, Tanaka Y, Endo Y, Osumi N, Okamoto H, Wakamatsu Y.	Slug,SMAD1,BMP4			hippo					Critical role of glioma-associated oncogene homolog 1 in maintaining invasive and mesenchymal-like properties of melanoma cells.	/pubmed/28635133	Gunarta IK, Li R, Nakazato R, Suzuki R, Boldbaatar J, Suzuki T, Yoshioka K.	glioma-associated oncogene homolog 1 (GLI1) ,				Targeting the Notch1 oncogene by miR-139-5p inhibits glioma metastasis and epithelial-mesenchymal transition (EMT).	/pubmed/30170559	Li J, Li Q, Lin L, Wang R, Chen L, Du W, Jiang C, Li R.	NOTCH1, CDH2, SNAI1, DFS and OS				The role of ZBTB38 in promoting migration and invasive growth of bladder cancer cells.	/pubmed/30569128	Jing J, Liu J, Wang Y, Zhang M, Yang L, Shi F, Liu P, She J.	ZBTB38, Wnt/β‑catenin			[Cancer stem cells and metastatic dissemination].	/pubmed/29153544	Pannequin J.	unable to access			Inhibition of CXCR4 regulates epithelial mesenchymal transition of NSCLC via the Hippo-YAP signaling pathway.	/pubmed/29972256	Zheng CH, Chen XM, Zhang FB, Zhao C, Tu SS.	CXCR4, YAP
							Heterotopic shift of epithelial-mesenchymal interactions in vertebrate jaw evolution.	/pubmed/12016315	Shigetani Y, Sugahara F, Kawakami Y, Murakami Y, Hirano S, Kuratani S.	Unable to access full text			Title	URL	Description	Gene(s)		EMT cells increase breast cancer metastasis via paracrine GLI activation in neighbouring tumour cells.	/pubmed/28604738	Neelakantan D, Zhou H, Oliphant MUJ, Zhang X, Simon LM, Henke DM, Shaw CA, Wu MF, Hilsenbeck SG, White LD, Lewis MT, Ford HL.	Snail1, Zeb1 and Twist1, but not Snail2 or Zeb2				MicroRNA-133a inhibits gastric cancer cells growth, migration, and epithelial-mesenchymal transition process by targeting presenilin 1.	/pubmed/30161272	Chen XB, Li W, Chu AX.	PSEN1, MicroRNA-133a				Myosin Heavy Chain 10 (MYH10) Gene Silencing Reduces Cell Migration and Invasion in the Glioma Cell Lines U251, T98G, and SHG44 by Inhibiting the Wnt/Ô_-Catenin Pathway.	/pubmed/30552850	Wang Y, Yang Q, Cheng Y, Gao M, Kuang L, Wang C.	MYH10 gene, TIMP2, collagen 1, E-cadherin, vimentin, Wnt3a, β-catenin, and cyclin D1			Reversion of epithelial-mesenchymal transition by a novel agent DZ-50 via IGF binding protein-3 in prostate cancer cells.	/pubmed/29108245	Cao Z, Koochekpour S, Strup SE, Kyprianou N.	TGF-β1, IGFBP3			Mesenchymal marker and LGR5 expression levels in circulating tumor cells correlate with colorectal cancer prognosis.	/pubmed/29949050	Wang W, Wan L, Wu S, Yang J, Zhou Y, Liu F, Wu Z, Cheng Y.	LGR5
													G0/G1 Switch 2 Induces Cell Survival and Metastasis through Integrin-Mediated Signal Transduction in Human Invasive Breast Cancer Cells.	/pubmed/31272137	Cho E, Kwon YJ, Ye DJ, Baek HS, Kwon TU, Choi HK, Chun YJ.	FAK-Src, b-catenin, e-cadherin		Involvement of PI3K/Akt pathway in the inhibition of hepatocarcinoma cell invasion and metastasis induced by SASH1 through downregulating Shh-Gli1 signaling.	/pubmed/28600143	Sun C, Zhang Z, He P, Zhou Y, Xie X.	SASH1, Shh and Gli1,				The Prognostic Value of Cancer Stem Cell Markers (Notch1, ALDH1, and CD44) in Primary Colorectal Carcinoma.	/pubmed/30136202	Mohamed SY, Kaf RM, Ahmed MM, Elwan A, Ashour HR, Ibrahim A.	ALDH1, Notch1, and CD44				SRPX2 knockdown inhibits cell proliferation and metastasis and promotes chemosensitivity in esophageal squamous cell carcinoma.	/pubmed/30551519	He F, Wang H, Li Y, Liu W, Gao X, Chen D, Wang Q, Shi G.	SRPX2, β-catenin, cyclin D1 and c-myc			TGF-Ô_ Stimulation of EMT Programs Elicits Non-genomic ER-Ô± Activity and Anti-estrogen Resistance in Breast Cancer Cells.	/pubmed/28955730	Tian M, Schiemann WP.	ER-α , EGF, IGF-1, MAPKs			GŠ—•proteinŠ—•coupled receptorÎ¾120 regulates the development and progression of human esophageal cancer.	/pubmed/29901155	Cui Z, Li D, Liu J, Zhang Y, Xu H, Yin H, Li H, Wang G, Cai H, Zhang L, Duan S, Jiang H.	GPR120, PI3K and I‑κB, VEGF, IL‑8, Cox‑2
IGF							FGF						Knockdown of YAP inhibits growth in Hep-2 laryngeal cancer cells via epithelial-mesenchymal transition and the Wnt/ë_-catenin pathway.	/pubmed/31269911	Tang X, Sun Y, Wan G, Sun J, Sun J, Pan C.	YAP, DKK1, vimentin, β-catenin		FOXR2 Promotes the Proliferation, Invasion, and Epithelial-Mesenchymal Transition in Human Colorectal Cancer Cells.	/pubmed/28548041	Lu SQ, Qiu Y, Dai WJ, Zhang XY.	Forkhead box R2 (FOXR2),				Molecular Analysis of Endothelial-mesenchymal Transition Induced by Transforming Growth Factor-Ô_ Signaling.	/pubmed/30124659	Suzuki HI, Horie M, Mihira H, Saito A.	FGFR, P-MAP4K4				UbiquitinŠ—•specific protease 7 promotes osteosarcoma cell metastasis by inducing epithelialŠ—•mesenchymal transition.	/pubmed/30542736	Zeng Q, Li Z, Zhao X, Guo L, Yu C, Qin J, Zhang S, Zhang Y, Yang X.	USP7			Luteolin reduces migration of human glioblastoma cell lines via inhibition of the p-IGF-1R/PI3K/AKT/mTOR signaling pathway.	/pubmed/28927111	Wang Q, Wang H, Jia Y, Ding H, Zhang L, Pan H.	TIMP-1 and TIMP-2, MMP-2, MMP-9, p-IGF-1R/PI3K/AKT/mTOR			CXCR4/CXCL12 Signaling and Protumor Macrophages in Primary Tumors and Sentinel Lymph Nodes Are Involved in Luminal B Breast Cancer Progression.	/pubmed/29849822	Raschioni C, Bottai G, Sagona A, Errico V, Testori A, Gatzemeier W, Corsi F, Tinterri C, Roncalli M, Santarpia L, Di Tommaso L.	CXCR4 with CXCL12, VIM, and CD163
Title	URL	Description	Gene(s)				Title	URL	Description	Gene(s)			Systems-level analysis reveals multiple modulators of epithelial-mesenchymal transition and identifies DNAJB4 and CD81 as novel metastasis inducers in breast cancer.	/pubmed/31221721	Uretmen Kagiali ZC, Sanal E, Karayel ÌÐ, Polat AN, Saatci ÌÐ, Ersan PG, Trappe K, Renard BY, ÌÐnder TT, Tuncbag N, _ahin ÌÐ, Ozlu N.	DNAJB4, CD81		Efficacy of continuous EGFR-inhibition and role of Hedgehog in EGFR acquired resistance in human lung cancer cells with activating mutation of EGFR.	/pubmed/28416737	Della Corte CM, Malapelle U, Vigliar E, Pepe F, Troncone G, Ciaramella V, Troiani T, Martinelli E, Belli V, Ciardiello F, Morgillo F.	epidermal growth factor receptor (EGFR)				A novel inhibitor of ADAM17 sensitizes colorectal cancer cells to 5-Fluorouracil by reversing Notch and epithelial-mesenchymal transition in vitro and in vivo.	/pubmed/30069943	Li DD, Zhao CH, Ding HW, Wu Q, Ren TS, Wang J, Chen CQ, Zhao QC.	ADAM17, ZLDI-8				MicroRNA-197 Promotes Metastasis of Hepatocellular Carcinoma by Activating Wnt/Ô_-Catenin Signaling.	/pubmed/30453289	Hu Z, Wang P, Lin J, Zheng X, Yang F, Zhang G, Chen D, Xie J, Gao Z, Peng L, Xie C.	MicroRNA-197, Axin2, NKD1, and DKK2			LncRNAAC132217.4, a KLF8-regulated long non-coding RNA, facilitates oral squamous cell carcinoma metastasis by upregulating IGF2 expression.	/pubmed/28823965	Li X, Ma C, Zhang L, Li N, Zhang X, He J, He R, Shao M, Wang J, Kang L, Han C.	KLF8 and IGF2, LncRNAAC132217.4			Validation of Neurotensin Receptor 1 as a Therapeutic Target for Gastric Cancer.	/pubmed/29794962	Akter H, Yoon JH, Yoo YS, Kang MJ.	NTSR1, MMP-9
Reprogramming Postnatal Human Epidermal Keratinocytes Toward Functional Neural Crest Fates.	/pubmed/28142205	Bajpai VK, Kerosuo L, Tseropoulos G, Cummings KA, Wang X, Lei P, Liu B, Liu S, Popescu GK, Bronner ME, Andreadis ST.	KRT14				From the Cover: Usage of Dexamethasone Increases the Risk of Cranial Neural Crest Dysplasia in the Chick Embryo.	/pubmed/28453788	Cheng X, Li H, Yan Y, Wang G, Berman Z, Chuai M, Yang X.	HNK-1, PAX7, AP-2α			Truncated TEAD-binding protein of TAZ inhibits glioma survival through the induction of apoptosis and repression of epithelial-mesenchymal transition.	/pubmed/31209945	Zhao W, Li LW, Tian RF, Dong QF, Li PQ, Yan ZF, Yang X, Huo JL, Fei Z, Zhen HN.	Could not access full article		Silencing of A-Kinase Anchor Protein 4 (AKAP4) Inhibits Proliferation and Progression of Thyroid Cancer.	/pubmed/27983916	Han J, Gao W, Su D, Liu Y.	A-kinase anchor protein 4 (AKAP4), Shh, Smo, Ptc, and Gli-1				A mechanism-based computational model to capture the interconnections among epithelial-mesenchymal transition, cancer stem cells and Notch-Jagged signaling.	/pubmed/30042822	Bocci F, Jolly MK, George JT, Levine H, Onuchic JN.	Notch-Jagged				Secreted Frizzled Related Protein 2 Modulates Epithelial-Mesenchymal Transition and Stemness via Wnt/Ô_-Catenin Signaling in Choriocarcinoma.	/pubmed/30396168	Zeng X, Zhang Y, Xu H, Zhang T, Xue Y, An R.	SFRP2			Insulin-like growth factor-1 activates different catalytic subunits p110 of PI3K in a cell-type-dependent manner to induce lipogenesis-dependent epithelial-mesenchymal transition through the regulation of ADAM10 and ADAM17.	/pubmed/28819788	Park GB, Kim D.	IGF-1, CAL-101, ADAM10 and ADAM17, PI3K p110			LGR5 promotes epithelial ovarian cancer proliferation, metastasis, and epithelial-mesenchymal transition through the Notch1 signaling pathway.	/pubmed/29777575	Liu W, Zhang J, Gan X, Shen F, Yang X, Du N, Xia D, Liu L, Qiao L, Pan J, Sun Y, Xi X.	LGR5, Notch1
Cadherin-6B is required for the generation of Islet-1-expressing dorsal interneurons.	/pubmed/25747715	Park KS, Gumbiner BM.	Cadherin-6B				Reprogramming Postnatal Human Epidermal Keratinocytes Toward Functional Neural Crest Fates.	/pubmed/28142205	Bajpai VK, Kerosuo L, Tseropoulos G, Cummings KA, Wang X, Lei P, Liu B, Liu S, Popescu GK, Bronner ME, Andreadis ST.	Fgf2,IgF1			A Ca(2+)-ATPase Regulates E-cadherin Biogenesis and Epithelial-Mesenchymal Transition in Breast Cancer Cells.	/pubmed/31076498	Dang DK, Makena MR, Llongueras JP, Prasad H, Ko M, Bandral M, Rao R.	ATP2C2, E-Cadherin		Prometastatic mechanisms of CAF-mediated EMT regulation in pancreatic cancer cells.	/pubmed/27878234	Shan T, Chen S, Chen X, Lin WR, Li W, Ma J, Wu T, Ji H, Li Y, Cui X, Kang Y.	E-cadherin, vimentin, Gli1, Snail				Notch signalling induces epithelialŠ—•mesenchymal transition to promote metastasis in oral squamous cell carcinoma.	/pubmed/30015856	Zhang J, Zheng G, Zhou L, Li P, Yun M, Shi Q, Wang T, Wu X.	SNAI1, E‑cadherin, vimentin				Rhazyaminine from Rhazya stricta Inhibits Metastasis and Induces Apoptosis by Downregulating Bcl-2 Gene in MCF7 Cell Line.	/pubmed/30373413	Iqbal W, Alkarim S, Kamal T, Choudhry H, Sabir J, Bora RS, Saini KS.	Bcl-2 gene			Selective analysis of cancer-cell intrinsic transcriptional traits defines novel clinically relevant subtypes of colorectal cancer.	/pubmed/28561063	Isella C, Brundu F, Bellomo SE, Galimi F, Zanella E, Porporato R, Petti C, Fiori A, Orzan F, Senetta R, Boccaccio C, Ficarra E, Marchionni L, Trusolino L, Medico E, Bertotti A.	TP53, IGF2			GRP137 promotes cell proliferation and metastasis through regulation of the PI3K/AKT pathway in human ovarian cancer.	/pubmed/29739299	Zhang LQ, Yang SQ, Qu XD, Chen XJ, Lu HS, Wang Y.	GPR137, PI3K/AKT
LIF-JAK1-STAT3 signaling delays contact inhibition of human corneal endothelial cells.	/pubmed/25695744	Liu X, Tseng SC, Zhang MC, Chen SY, Tighe S, Lu WJ, Zhu YT.	E2F2, JAK1, LIF, proliferation, p16INK4a, STAT3				LIF-JAK1-STAT3 signaling delays contact inhibition of human corneal endothelial cells.	/pubmed/25695744	Liu X, Tseng SC, Zhang MC, Chen SY, Tighe S, Lu WJ, Zhu YT.	LIF,JAK1,STAT3, E2F2,INK4a			Gelsolin-like actin-capping protein has prognostic value and promotes tumorigenesis and epithelial-mesenchymal transition via the Hippo signaling pathway in human bladder cancer.	/pubmed/31068979	Zhaojie L, Yuchen L, Miao C, Yacun C, Shayi W, Anbang H, Xinhui L, Meng Z, Peipei W, Hongbing M, Feng W, Zhiming C, Xinyuan G.	CAPG		Galectin-1 from cancer-associated fibroblasts induces epithelial-mesenchymal transition through Ô_1 integrin-mediated upregulation of Gli1 in gastric cancer.	/pubmed/27836001	Chong Y, Tang D, Xiong Q, Jiang X, Xu C, Huang Y, Wang J, Zhou H, Shi Y, Wu X, Wang D.	Galectin-1 (Gal-1), β1 integrin, Gli1,				Upregulated SCUBE2 expression in breast cancer stem cells enhances triple negative breast cancer aggression through modulation of notch signaling and epithelial-to-mesenchymal transition.	/pubmed/29981340	Chen JH, Kuo KT, Bamodu OA, Lin YC, Yang RB, Yeh CT, Chao TY.	NICD, Jagged 1, HEY1, and HES1, SCUBE2				Dextran sulfate inhibition on human gastric cancer cells invasion, migration and epithelial-mesenchymal transformation.	/pubmed/30250571	Xu Y, Jin X, Huang Y, Wang J, Wang X, Wang H.	HIF-1α, Twist and N-cad , dextran sulfate (DS)			IGF1/IGF1R/STAT3 signaling-inducible IFITM2 promotes gastric cancer growth and metastasis.	/pubmed/28223169	Xu L, Zhou R, Yuan L, Wang S, Li X, Ma H, Zhou M, Pan C, Zhang J, Huang N, Shi M, Bin J, Liao Y, Liao W.	IFITM2			NANOGP8 is the key regulator of stemness, EMT, Wnt pathway, chemoresistance, and other malignant phenotypes in gastric cancer cells.	/pubmed/29689047	Ma X, Wang B, Wang X, Luo Y, Fan W.	NANOG1 and NANOGP8
Snail2, a mediator of epithelial-mesenchymal transitions, expressed in progenitor cells of the developing endocrine pancreas.	/pubmed/17185046	Rukstalis JM, Habener JF.	SNAIL2 (Slug?)				Neural crest specification by inhibition of the ROCK/Myosin II pathway.	/pubmed/25346532	Kim K, Ossipova O, Sokol SY.	Myosin II			[Citron Rho-interacting serine/threonine kinase knockdown suppresses prostate cancer cell proliferation and metastasis by blocking Hippo-YAP pathway].	/pubmed/31068310	Haiping C, Qi X, Dawei L, Qiang W.	CIT		Galectin-1 induces invasion and the epithelial-mesenchymal transition in human gastric cancer cells via non-canonical activation of the hedgehog signaling pathway.	/pubmed/27835885	Chong Y, Tang D, Gao J, Jiang X, Xu C, Xiong Q, Huang Y, Wang J, Zhou H, Shi Y, Wang D.	Galectin-1 (Gal-1), Gli-1,				Cervical Cancer Cell Growth, Drug Resistance, and Epithelial-Mesenchymal Transition Are Suppressed by y-Secretase Inhibitor RO4929097.	/pubmed/29899322	Wang L, Dai G, Yang J, Wu W, Zhang W.	Notch2				2'Š—•Hydroxyflavanone inhibits epithelialŠ—•mesenchymal transition, and cell migration and invasion via suppression of the Wnt/Ô_Š—•catenin signaling pathway in prostate cancer.	/pubmed/30226607	Wu S, Huang J, Hui K, Yue Y, Gu Y, Ning Z, Wang X, He D, Wu K.	2HF, GSK‑3β , β‑catenin			IGFBP2 Activates the NF-Ô_B Pathway to Drive Epithelial-Mesenchymal Transition and Invasive Character in Pancreatic Ductal Adenocarcinoma.	/pubmed/27659045	Gao S, Sun Y, Zhang X, Hu L, Liu Y, Chua CY, Phillips LM, Ren H, Fleming JB, Wang H, Chiao PJ, Hao J, Zhang W.	IGFBP2 , PTEN, NF-κB			Downregulation of miR-3127-5p promotes epithelial-mesenchymal transition via FZD4 regulation of Wnt/Ô_-catenin signaling in non-small-cell lung cancer.	/pubmed/29566281	Yang Y, Sun Y, Wu Y, Tang D, Ding X, Xu W, Su B, Gao W.	MiR-3127-5p, FZD4
							Non-invasive neural stem cells become invasive in vitro by combined FGF2 and BMP4 signaling.	/pubmed/23788430	Sailer MH, Gerber A, Tostado C, Hutter G, Cordier D, Mariani L, Ritz MF.	FGF2 ,BMP4			Tankyrase1 antisense oligodeoxynucleotides suppress the proliferation, migration and invasion through Hippo/YAP pathway in human osteosarcoma cells.	/pubmed/30926223	Zhou Y, Jin Q, Xiao W, Sun C.	TANK1		Gli1, a potential regulator of esophageal cancer stem cell, is identified as an independent adverse prognostic factor in esophageal squamous cell carcinoma.	/pubmed/27680978	Yang Z, Cui Y, Ni W, Kim S, Xuan Y.	Gli1, Sox9, CD44, Sox2, LSD1, and Oct4				Differentiation-inducing therapeutic effect of Notch inhibition in reversing malignant transformation of liver normal stem cells via MET.	/pubmed/29721169	Luo H, Liu WH, Liang HY, Yan HT, Lin N, Li DY, Wang T, Tang LJ.	HOTAIR				LncRNA SLCO4A1-AS1 facilitates growth and metastasis of colorectal cancer through Ô_-catenin-dependent Wnt pathway.	/pubmed/30201010	Yu J, Han Z, Sun Z, Wang Y, Zheng M, Song C.	LncRNA SLCO4A1-AS1			Secretome of tumor-associated leukocytes augment epithelial-mesenchymal transition in positive lymph node breast cancer patients via activation of EGFR/Tyr845 and NF-Ô_B/p65 signaling pathway.	/pubmed/27329104	Elghonaimy EA, Ibrahim SA, Youns A, Hussein Z, Nouh MA, El-Mamlouk T, El-Shinawi M, Mostafa Mohamed M.	TARC, IGF-1, IL-3, TNF-β, IL-5, G-CSF, IL-4, and IL-1α			Proteinase-activated receptor 2 promotes tumor cell proliferation and metastasis by inducing epithelial-mesenchymal transition and predicts poor prognosis in hepatocellular carcinoma.	/pubmed/29563756	Sun L, Li PB, Yao YF, Xiu AY, Peng Z, Bai YH, Gao YJ.	PAR2, ERK
							FGF and retinoic acid activity gradients control the timing of neural crest cell emigration in the trunk.	/pubmed/21807879	MartÌ_nez-Morales PL, Diez del Corral R, Olivera-MartÌ_nez I, Quiroga AC, Das RM, Barbas JA, Storey KG, Morales AV.	FGF			miR-664a-3p functions as an oncogene by targeting Hippo pathway in the development of gastric cancer.	/pubmed/30883979	Wang L, Li B, Zhang L, Li Q, He Z, Zhang X, Huang X, Xu Z, Xia Y, Zhang Q, Li Q, Xu J, Sun G, Xu Z.	miR-664a-3p, MOB1A		Inhibitory effect of bufalin combined with Hedgehog signaling pathway inhibitors on proliferation and invasion and metastasis of liver cancer cells.	/pubmed/27634330	Sheng X, Sun X, Sun K, Sui H, Qin J, Li Q.	Ptch1'Gli1'Gli3 proteins, MMP-2, MMP-9, β-catenin and VEGF, Gli1 and Gli3, E-cadherin				Knockdown of L1CAM significantly reduces metastasis in a xenograft model of human melanoma: L1CAM is a potential target for anti-melanoma therapy.	/pubmed/29432466	Ernst AK, Putscher A, Samatov TR, Suling A, Galatenko VV, Shkurnikov MY, Knyazev EN, Tonevitsky AG, Haalck T, Lange T, Maar H, Schr’_der-Schwarz J, Riecken K, Schumacher U, Wicklein D.	Jagged 1, p53/p21 and p38				MicroRNA-590-5p functions as a tumor suppressor in breast cancer conferring inhibitory effects on cell migration, invasion, and epithelial-mesenchymal transition by downregulating the Wnt-Ô_-catenin signaling pathway.	/pubmed/30191949	Gao J, Yu SR, Yuan Y, Zhang LL, Lu JW, Feng JF, Hu SN.	PITX2, miR-590-5p, Wnt-1, β-catenin, N-cadherin, and vimentin			IGF-1 contributes to the expansion of melanoma-initiating cells through an epithelial-mesenchymal transition process.	/pubmed/27764776	Le Coz V, Zhu C, Devocelle A, Vazquez A, Boucheix C, Azzi S, Gallerne C, Eid P, Lecourt S, Giron-Michel J.	IGF- 1, ZEB1, SOX2, Oct-3/4, CD24 and CD133, N-cadherin, CD44, CD29, CD105			Frizzled7 Promotes Epithelial-to-mesenchymal Transition and Stemness Via Activating Canonical Wnt/Ô_-catenin Pathway in Gastric Cancer.	/pubmed/29559846	Li G, Su Q, Liu H, Wang D, Zhang W, Lu Z, Chen Y, Huang X, Li W, Zhang C, He Y, Fu L, Bi J.	FZD7, Wnt/β-catenin
GPCR							BMP2 and FGF2 cooperate to induce neural-crest-like fates from fetal and adult CNS stem cells.	/pubmed/16339968	Sailer MH, Hazel TG, Panchision DM, Hoeppner DJ, Schwab ME, McKay RD.	FGF2,BMP2			Frizzled 2-induced epithelial-mesenchymal transition correlates with vasculogenic mimicry, stemness, and Hippo signaling in hepatocellular carcinoma.	/pubmed/30677195	Ou H, Chen Z, Xiang L, Fang Y, Xu Y, Liu Q, Hu Z, Li X, Huang Y, Yang D.	FZD2		Ô±-Mangostin-encapsulated PLGA nanoparticles inhibit pancreatic carcinogenesis by targeting cancer stem cells in human, and transgenic (Kras(G12D), and Kras(G12D)/tp53R270H) mice.	/pubmed/27624879	Verma RK, Yu W, Shrivastava A, Shankar S, Srivastava RK.	E-cadherin, N-cadherin, Slug, Nanog, c-Myc, and Oct4, c-Myc, Nanog, Oct4, CD24, CD133, Gli1, Gli2, Patched1/2, Smoothened, Bcl-2, XIAP, Cyclin D1, N-cadherin, Slug, Snail and Zeb1				Glutaredoxin 3 promotes migration and invasion via the Notch signalling pathway in oral squamous cell carcinoma.	/pubmed/29397791	Li B, Chen M, Lu M, Xin-Xiang J, Meng-Xiong P, Jun-Wu M.	GLRX3, ROS, NAC				Lipophilic statins antagonistically alter the major epithelial-to-mesenchymal transition signaling pathways in breast cancer stem-like cells via inhibition of the mevalonate pathway.	/pubmed/30191610	Koohestanimobarhan S, Salami S, Imeni V, Mohammadi Z, Bayat O.	CD44			IGF-I Induces Epithelial-to-Mesenchymal Transition via the IGF-IR-Src-MicroRNA-30a-E-Cadherin Pathway in Nasopharyngeal Carcinoma Cells.	/pubmed/27656832	Wang R, Li H, Guo X, Wang Z, Liang S, Dang C.	microRNA-30a, E-cadherin			Activated CXCL5-CXCR2 axis promotes the migration, invasion and EMT of papillary thyroid carcinoma cells via modulation of Ô_-catenin pathway.	/pubmed/29471001	Cui D, Zhao Y, Xu J.	CXCL5-CXCR2, Akt/GSK-3β/β-catenin
Title	URL	Description	Gene(s)				Heterotopic shift of epithelial-mesenchymal interactions in vertebrate jaw evolution.	/pubmed/12016315	Shigetani Y, Sugahara F, Kawakami Y, Murakami Y, Hirano S, Kuratani S.	Unable to access			Helicobacter pylori CagA promotes epithelial mesenchymal transition in gastric carcinogenesis via triggering oncogenic YAP pathway.	/pubmed/30466467	Li N, Feng Y, Hu Y, He C, Xie C, Ouyang Y, Artim SC, Huang D, Zhu Y, Luo Z, Ge Z, Lu N.	CAGA, YAP		Significance of the hedgehog pathway-associated proteins Gli-1 and Gli-2 and the epithelial-mesenchymal transition-associated proteins Twist and E-cadherin in hepatocellular carcinoma.	/pubmed/27602109	Chun HW, Hong R.	Gli-1, Gli-2, E-cadherin and Twist				Notch signaling molecule is involved in the invasion of MiaPaCa2 cells induced by CoCl2 via regulating epithelialŠ—•mesenchymal transition.	/pubmed/29393429	Chen DW, Wang H, Bao YF, Xie K.	HIF‑1α, Snail				Hypermethylated KCNQ1 acts as a tumor suppressor in hepatocellular carcinoma.	/pubmed/30144972	Fan H, Zhang M, Liu W.	c-Myc, MMP7, and CCND1, KCNQ1			Biologic Evaluation of Diabetes and Local Recurrence in Non-Small Cell Lung Cancer.	/pubmed/27411924	Yang X, Liu Y, Mani H, Olson J, Clawson G, Caruso C, Bruggeman R, Varlotto JM, Zander DS, Rassaei N.	TGF-β, HtrA1, and beta-catenin, IGF-1R, vimentin			Transcriptomic analyses of chemokines reveal that down-regulation of XCR1 is associated with advanced hepatocellular carcinoma.	/pubmed/29408492	Yanru W, Zhenyu B, Zhengchuan N, Qi Q, Chunmin L, Weiqiang Y.	XCR1
Identification of anti-cancer chemical compounds using Xenopus embryos.	/pubmed/27019404	Tanaka M, Kuriyama S, Itoh G, Kohyama A, Iwabuchi Y, Shibata H, Yashiro M, Aiba N.	All chemical compounds, but does mention inhibitor of the following gene: CXCR4				The role of growth factors in determination and differentiation of the odontoblastic cell lineage.	/pubmed/1508891	Thesleff I, Vaahtokari A.	TGFb1,int-2			TEAD4 overexpression promotes epithelial-mesenchymal transition and associates with aggressiveness and adverse prognosis in head neck squamous cell carcinoma.	/pubmed/30459528	Zhang W, Li J, Wu Y, Ge H, Song Y, Wang D, Yuan H, Jiang H, Wang Y, Cheng J.	TEAD4		Gli promotes epithelial-mesenchymal transition in human lung adenocarcinomas.	/pubmed/27533453	Li H, Yue D, Jin JQ, Woodard GA, Tolani B, Luh TM, Giroux-Leprieur E, Mo M, Chen Z, Che J, Zhang Z, Zhou Y, Wang L, Hao X, Jablons D, Wang C, He B.	Gli, E-Cadherin, SHh,				Antiestrogen Therapy Increases Plasticity and Cancer Stemness of Prolactin-Induced ERÔ±(+) Mammary Carcinomas.	/pubmed/29363543	Shea MP, O'Leary KA, Fakhraldeen SA, Goffin V, Friedl A, Wisinski KB, Alexander CM, Schuler LA.	SERD				LINC01133 as ceRNA inhibits gastric cancer progression by sponging miR-106a-3p to regulate APC expression and the Wnt/Ô_-catenin pathway.	/pubmed/30134915	Yang XZ, Cheng TT, He QJ, Lei ZY, Chi J, Tang Z, Liao QX, Zhang H, Zeng LS, Cui SZ.	LINC01133, miR-106a-3p			Small cell lung cancer: Circulating tumor cells of extended stage patients express a mesenchymal-epithelial transition phenotype.	/pubmed/26919626	Hamilton G, Hochmair M, Rath B, Klameth L, Zeillinger R.	SOX17, α-fetoprotein, OCT-3/4, KDR, Otx2, GATA-4, Nanog, HCG, TP63 and Goosecoid, HNF-3β/FOXA2 and PDX-1/IPF1			The CXCL12-CXCR4 axis promotes migration, invasiveness, and EMT in human papillary thyroid carcinoma B-CPAP cells via NF-Ô_B signaling.	/pubmed/29316404	Lin Y, Ma Q, Li L, Wang H.	CXCL12-CXCR4, NF-κB
A role for smoothened during murine lens and cornea development.	/pubmed/25268479	Choi JJ, Ting CT, Trogrlic L, Milevski SV, Familari M, Martinez G, de Iongh RU.	Hh genes (Ptch1, Smo, Gli2, Gli3)										Loss of HACE1 promotes colorectal cancer cell migration via upregulation of YAP1.	/pubmed/30362561	Zhou Z, Zhang HS, Zhang ZG, Sun HL, Liu HY, Gou XM, Yu XY, Huang YH.	HACE1; YAP1;		Hedgehog pathway is involved in nitidine chloride induced inhibition of epithelial-mesenchymal transition and cancer stem cells-like properties in breast cancer cells.	/pubmed/27313840	Sun M, Zhang N, Wang X, Li Y, Qi W, Zhang H, Li Z, Yang Q.	Snail, Slug, Zeb1, N-cadherin, E-cadherin, Vimentin, Nanog, Nestin, Oct-4, CD44, transforming growth factor-β1 (TGF-β1)				FYN promotes mesenchymal phenotypes of basal type breast cancer cells through STAT5/NOTCH2 signaling node.	/pubmed/29348460	Lee GH, Yoo KC, An Y, Lee HJ, Lee M, Uddin N, Kim MJ, Kim IG, Suh Y, Lee SJ.	NOTCH2 , Jagged-1 and DLL4 , FYN and STAT5				PRSS8 suppresses colorectal carcinogenesis and metastasis.	/pubmed/30115975	Bao Y, Guo Y, Yang Y, Wei X, Zhang S, Zhang Y, Li K, Yuan M, Guo D, Macias V, Zhu X, Zhang W, Yang W.	PRSS8			IGF/STAT3/NANOG/Slug Signaling Axis Simultaneously Controls Epithelial-Mesenchymal Transition and Stemness Maintenance in Colorectal Cancer.	/pubmed/26840943	Yao C, Su L, Shan J, Zhu C, Liu L, Liu C, Xu Y, Yang Z, Bian X, Shao J, Li J, Lai M, Shen J, Qian C.	IGF/STAT3/NANOG/Slug			Epithelial mesenchymal transition induced by the CXCL9/CXCR3 axis through AKT activation promotes invasion and metastasis in tongue squamous cell carcinoma.	/pubmed/29286143	Li Z, Liu J, Li L, Shao S, Wu J, Bian L, He Y.	CXCL9/CXCR3, Akt2, eIF4E
In vivo collective cell migration requires an LPAR2-dependent increase in tissue fluidity.	/pubmed/25002680	Kuriyama S, Theveneau E, Benedetto A, Parsons M, Tanaka M, Charras G, Kabla A, Mayor R.	N-Cadherin (LPA?)				hippo						A FUS-LATS1/2 Axis Inhibits Hepatocellular Carcinoma Progression via Activating Hippo Pathway.	/pubmed/30308519	Bao L, Yuan L, Li P, Bu Q, Guo A, Zhang H, Cui N, Liu B.	FUS/LATS1/2		Curcumin inhibits hypoxia-induced epithelialŠ—•mesenchymal transition in pancreatic cancer cells via suppression of the hedgehog signaling pathway.	/pubmed/27035865	Cao L, Xiao X, Lei J, Duan W, Ma Q, Li W.	E-cadherin, N-cadherin, vimentin, SHH, SMO and GLI1,				Lactate-activated macrophages induced aerobic glycolysis and epithelial-mesenchymal transition in breast cancer by regulation of CCL5-CCR5 axis: a positive metabolic feedback loop.	/pubmed/29299159	Lin S, Sun L, Lyu X, Ai X, Du D, Su N, Li H, Zhang L, Yu J, Yuan S.	CCL5, CCR5				LncNEN885 inhibits epithelial-mesenchymal transition by partially regulation of Wnt/Ô_-catenin signalling in gastroenteropancreatic neuroendocrine neoplasms.	/pubmed/30033597	Wei YL, Hua J, Liu XY, Hua XM, Sun C, Bai JA, Tang QY.	LncNEN885			miR-122 inhibits metastasis and epithelial-mesenchymal transition of non-small-cell lung cancer cells.	/pubmed/26604787	Qin H, Sha J, Jiang C, Gao X, Qu L, Yan H, Xu T, Jiang Q, Gao H.	miR-122 , PI3K/AKT			LGR4 modulates breast cancer initiation, metastasis, and cancer stem cells.	/pubmed/29269400	Yue Z, Yuan Z, Zeng L, Wang Y, Lai L, Li J, Sun P, Xue X, Qi J, Yang Z, Zheng Y, Fang Y, Li D, Siwko S, Li Y, Luo J, Liu M.	LGR4, SLUG, E-cadherin, N-cadherin
The hypoxia factor Hif-1ë± controls neural crest chemotaxis and epithelial to mesenchymal transition.	/pubmed/23712262	Barriga EH, Maxwell PH, Reyes AE, Mayor R.	Hif-1α				Title	URL	Description	Gene(s)			miR-103 promotes the metastasis and EMT of hepatocellular carcinoma by directly inhibiting LATS2.	/pubmed/30272278	Han LL, Yin XR, Zhang SQ.	miR‑103/LATS2		Gedunin inhibits pancreatic cancer by altering sonic hedgehog signaling pathway.	/pubmed/26988754	Subramani R, Gonzalez E, Nandy SB, Arumugam A, Camacho F, Medel J, Alabi D, Lakshmanaswamy R.	sonic hedgehog signaling pathways				Homeodomain-interacting protein kinase promotes tumorigenesis and metastatic cell behavior.	/pubmed/29208636	Blaquiere JA, Wong KKL, Kinsey SD, Wu J, Verheyen EM.	Wnt/Wingless, Hippo, Notch and JNK				Bulk tumour cell migration in lung carcinomas might be more common than epithelial-mesenchymal transition and be differently regulated.	/pubmed/29976164	Zacharias M, Brcic L, Eidenhammer S, Popper H.	ERK1/2, CXCR2, Brk and Mad, Tsk5, Rab40B, PLCγ			HRD1 suppresses the growth and metastasis of breast cancer cells by promoting IGF-1R degradation.	/pubmed/26536657	Xu YM, Wang HJ, Chen F, Guo WH, Wang YY, Li HY, Tang JH, Ding Y, Shen YC, Li M, Xuan WY, Liu LH, Wang J, Wang XR, Gao ZJ, Liang XB, Su DM.	NF-κB, IL-6, HRD1			MiRNALet-7a mediates prostate cancer PC-3 cell invasion, migration by inducing epithelial-mesenchymal transition through CCR7/MAPK pathway.	/pubmed/29236328	Tang G, Du R, Tang Z, Kuang Y.	CCR7, ERK, p38, MMP-9
							YAP promotes neural crest emigration through interactions with BMP and Wnt activities.	/pubmed/31228951	Kumar D, Nitzan E, Kalcheim C.	BMP,Wnt,noggin, Xdd1,YAP			miR-665 promotes hepatocellular carcinoma cell migration, invasion, and proliferation by decreasing Hippo signaling through targeting PTPRB.	/pubmed/30237408	Hu Y, Yang C, Yang S, Cheng F, Rao J, Wang X.	miR-665		Tetrandrine reverses epithelial-mesenchymal transition in bladder cancer by downregulating Gli-1.	/pubmed/26983576	Zhang Y, Liu W, He W, Zhang Y, Deng X, Ma Y, Zeng J, Kou B.	Gli1, E-cadherin, N-cadherin, vimentin and Slug				Numb prevents a complete epithelial-mesenchymal transition by modulating Notch signalling.	/pubmed/29187638	Bocci F, Jolly MK, Tripathi SC, Aguilar M, Hanash SM, Levine H, Onuchic JN.	Numb				MicroRNA-378 regulates epithelial-mesenchymal transition and metastasis of melanoma by inhibiting FOXN3 expression through the Wnt/Ô_-catenin pathway.	/pubmed/29972255	Sun M, Ma X, Tu C, Wang X, Qu J, Wang S, Xiao S.	MicroRNA-378, FOXN3			Alteration of gene expression in MDA-MB-453 breast cancer cell line in response to continuous exposure to Trastuzumab.	/pubmed/26367328	Sharieh EA, Awidi AS, Ahram M, Zihlif MA.	TGF-β1 and EGF, and IGFBP-3			Differential roles of kallikrein-related peptidase 6 in malignant transformation and Ô”Np63Ô_-mediated epithelial-mesenchymal transition of oral squamous cell carcinoma.	/pubmed/29224812	Kaneko N, Kawano S, Yasuda K, Hashiguchi Y, Sakamoto T, Matsubara R, Goto Y, Jinno T, Maruse Y, Morioka M, Hattori T, Tanaka S, Tanaka H, Kiyoshima T, Nakamura S.	KLK6 and PAR2, PAR1, ERK
													YAP drives cutaneous squamous cell carcinoma formation and progression.	/pubmed/30231971	Vincent-Mistiaen Z, Elbediwy A, Vanyai H, Cotton J, Stamp G, Nye E, Spencer-Dene B, Thomas GJ, Mao J, Thompson B.	YAP, Keratin-5		Hedgehog Signaling Regulates Epithelial-Mesenchymal Transition in Pancreatic Cancer Stem-Like Cells.	/pubmed/26918054	Wang F, Ma L, Zhang Z, Liu X, Gao H, Zhuang Y, Yang P, Kornmann M, Tian X, Yang Y.	Hedgehog (Hh) signaling				Actin cytoskeleton remodeling drives epithelial-mesenchymal transition for hepatoma invasion and metastasis in mice.	/pubmed/29171033	Peng JM, Bera R, Chiou CY, Yu MC, Chen TC, Chen CW, Wang TR, Chiang WL, Chai SP, Wei Y, Wang H, Hung MC, Hsieh SY.	KLHL23, HIF				CRIP1 promotes cell migration, invasion and epithelial-mesenchymal transition of cervical cancer by activating the Wnt/Ô_Š—•catenin signaling pathway.	/pubmed/29959029	Zhang LZ, Huang LY, Huang AL, Liu JX, Yang F.	CRIP1, β‑catenin			Androgen receptor inhibits epithelial-mesenchymal transition, migration, and invasion of PC-3 prostate cancer cells.	/pubmed/26297988	Huo C, Kao YH, Chuu CP.	APC, Akt2, Akt3, PI3K p85, phospho-PI3K p85 Tyr458, PI3K p85, and E-cadherin, GSK-3β, phospho-mTOR Ser2448, Skp2, NF-κB p50, Slug, N-cadherin, β-catenin, vimentin, MMP-9, and Snail			A Role for CXCR4 in Peritoneal and Hematogenous Ovarian Cancer Dissemination.	/pubmed/29146630	Figueras A, Alsina-Sanch’_s E, Lahiguera ’, Abreu M, Muinelo-Romay L, Moreno-Bueno G, Casanovas O, Graupera M, Matias-Guiu X, Vidal A, Villanueva A, Vi’±als F.	CXCR4
ECM							FAS						Lipophilic statins antagonistically alter the major epithelial-to-mesenchymal transition signaling pathways in breast cancer stem-like cells via inhibition of the mevalonate pathway.	/pubmed/30191610	Koohestanimobarhan S, Salami S, Imeni V, Mohammadi Z, Bayat O.	Hippo, Notch, Wnt,vimentin,E-cadherin, CD44,CD24		Resveratrol inhibits hypoxia-driven ROS-induced invasive and migratory ability of pancreatic cancer cells via suppression of the Hedgehog signaling pathway.	/pubmed/26707376	Li W, Cao L, Chen X, Lei J, Ma Q.	GLI1, HIF-1α, uPA and MMP2.				Downregulation of SNHG1 suppresses cell proliferation and invasion by regulating Notch signaling pathway in esophageal squamous cell cancer.	/pubmed/29081407	Zhang Y, Jin X, Wang Z, Zhang X, Liu S, Liu G.	SNHG1, E-cadherin, Vimentin and N-cadherin, Notch 1 and Hes-1				Twist promotes tumor metastasis in basal-like breast cancer by transcriptionally upregulating ROR1.	/pubmed/29774072	Cao J, Wang X, Dai T, Wu Y, Zhang M, Cao R, Zhang R, Wang G, Jiang R, Zhou BP, Shi J, Kang T.	Twist , ROR1			The involvement of survivin in insulin-like growth factor 1-induced epithelial-mesenchymal transition in gastric cancer.	/pubmed/26271669	Li C, Li J, Wu D, Han G.	p-ERK, p-AKT, survivin			Activation of adrenergic receptor Ô_2 promotes tumor progression and epithelial mesenchymal transition in tongue squamous cell carcinoma.	/pubmed/29138797	Liu H, Wang C, Xie N, Zhuang Z, Liu X, Hou J, Huang H.	β2‑adrenergic receptor (β2‑AR), interleukin‑6/Stat3/Snail1
Title	URL	Description	Gene(s)				Title	URL	Description	Gene(s)			The EZH2- H3K27me3-DNMT1 complex orchestrates epigenetic silencing of the wwc1 gene, a Hippo/YAP pathway upstream effector, in breast cancer epithelial cells.	/pubmed/30121333	Liu X, Li C, Zhang R, Xiao W, Niu X, Ye X, Li Z, Guo Y, Tan J, Li Y.	EZH2,wwc1		IL-6 promotes growth and epithelial-mesenchymal transition of CD133+ cells of non-small cell lung cancer.	/pubmed/26675547	Lee SO, Yang X, Duan S, Tsai Y, Strojny LR, Keng P, Chen Y.	Bcl-2/Bcl-xL, IL6, CD133				Novel transduction of nutrient stress to Notch pathway by RasGRP3 promotes malignant aggressiveness in human esophageal squamous cell carcinoma.	/pubmed/29048643	Hu G, Zhou Y, Zhu Y, Zhou L, Ling R, Wu D, Mi L, Wang X, Dai D, Mao C, Chen D.	vimentin, Snail, Slug and MMP9, Ras				Knockdown of Uba2 inhibits colorectal cancer cell invasion and migration through downregulation of the Wnt/Ô_-catenin signaling pathway.	/pubmed/29744931	Cheng H, Sun X, Li J, He P, Liu W, Meng X.	Uba2			Identification of Novel Biomarkers for Metastatic Colorectal Cancer Using Angiogenesis-Antibody Array and Intracellular Signaling Array.	/pubmed/26258407	Chung S, Dwabe S, Elshimali Y, Sukhija H, Aroh C, Vadgama JV.	IGFBP-3, DPP IV, PDGF AA/AB, endothelin I and CXCL16, IL-6; Akt, STAT3, AMPKα, Bad			CCL2/CCR2 axis induces hepatocellular carcinoma invasion and epithelial-mesenchymal transition inÎ¾vitro through activation of the Hedgehog pathway.	/pubmed/29115520	Zhuang H, Cao G, Kou C, Liu T.	CCL2/CCR2, Gli-1
Cadherin-6B proteolytic N-terminal fragments promote chick cranial neural crest cell delamination by regulating extracellular matrix degradation.	/pubmed/29958899	Schiffmacher AT, Adomako-Ankomah A, Xie V, Taneyhill LA.	Cad6B				Alcohol exposure induces chick craniofacial bone defects by negatively affecting cranial neural crest development.	/pubmed/28919490	Zhang P, Wang G, Lin Z, Wu Y, Zhang J, Liu M, Lee KKH, Chuai M, Yang X.	Laminin, N-Cadherin, Cadherin 6B,Cadherin 7			Inhibition of CXCR4 regulates epithelial mesenchymal transition of NSCLC via the Hippo-YAP signaling pathway.	/pubmed/29972256	Zheng CH, Chen XM, Zhang FB, Zhao C, Tu SS.	CXCR4, E-Cadherin, TWIST,Snail,Vimentin,p-YAP, CTGF,BIRC5,CXCR4; Hippo-YAP.		PI3K/AKT/mTOR and sonic hedgehog pathways cooperate together to inhibit human pancreatic cancer stem cell characteristics and tumor growth.	/pubmed/26451606	Sharma N, Nanta R, Sharma J, Gunewardena S, Singh KP, Shankar S, Srivastava RK.	Nanog, Oct-4, Sox-2, c-Myc, Gli, cadherin, vimentin, Snail, Slug and Zeb1				Long non-coding RNA, steroid receptor RNA activator (SRA), induces tumor proliferation and invasion through the NOTCH pathway in cervical cancer cell lines.	/pubmed/29039612	Eoh KJ, Paek J, Kim SW, Kim HJ, Lee HY, Lee SK, Kim YT.	lncRNA SRA				Low Dose of Bisphenol A Modulates Ovarian Cancer Gene Expression Profile and Promotes Epithelial to Mesenchymal Transition Via Canonical Wnt Pathway.	/pubmed/29718440	Hui L, Li H, Lu G, Chen Z, Sun W, Shi Y, Fu Z, Huang B, Zhu X, Lu W, Xia D, Wu Y.	drug study			A phenotype from tumor stroma based on the expression of metalloproteases and their inhibitors, associated with prognosis in breast cancer.	/pubmed/26140253	Eir’_ N, Fernandez-Garcia B, V’zquez J, Del Casar JM, Gonz’lez LO, Vizoso FJ.	NFkB, (MMP)-1, -2, -7, -9, -11, -13 , (TIMP)-1, -2 and -3			CXCR4/CXCR7/CXCL12 axis promotes an invasive phenotype in medullary thyroid carcinoma.	/pubmed/29112684	Werner TA, Forster CM, Dizdar L, Verde PE, Raba K, Schott M, Knoefel WT, Krieg A.	CXCR4/CXCR7/CXCL12
Tissue stiffening coordinates morphogenesis by triggering collective cell migration in vivo.	/pubmed/29443958	Barriga EH, Franze K, Charras G, Mayor R.	Snail2				FAF1, a gene that is disrupted in cleft palate and has conserved function in zebrafish.	/pubmed/21295280	Ghassibe-Sabbagh M, Desmyter L, Langenberg T, Claes F, Boute O, Bayet B, Pellerin P, Hermans K, Backx L, Mansilla MA, Imoehl S, Nowak S, Ludwig KU, Baluardo C, Ferrian M, Mossey PA, Noethen M, Dewerchin M, FranÌ¤ois G, Revencu N, Vanwijck R, Hecht J, et al.	FAF1, sox9a, col2a1			Simvastatin interferes with cancer 'stem-cell' plasticity reducing metastasis in ovarian cancer.	/pubmed/29848667	Kato S, Liberona MF, Cerda-Infante J, SÌÁnchez M, HenrÌ_quez J, Bizama C, Bravo ML, Gonzalez P, Gejman R, BraÌ±es J, GarcÌ_a K, IbaÌ±ez C, Owen GI, Roa JC, Montecinos V, Cuello MA.	Unable to access full text but abstract mentions :Innactivation of Hippo/YAP/RhoA pathways.		LncRNA-Hh Strengthen Cancer Stem Cells Generation in Twist-Positive Breast Cancer via Activation of Hedgehog Signaling Pathway.	/pubmed/26418365	Zhou M, Hou Y, Yang G, Zhang H, Tu G, Du YE, Wen S, Xu L, Tang X, Tang S, Yang L, Cui X, Liu M.	SOX2 and OCT4, GAS1				Dexamethasone mediates pancreatic cancer progression by glucocorticoid receptor, TGFÔ_ and JNK/AP-1.	/pubmed/28981109	Liu L, Aleksandrowicz E, Sch’_nsiegel F, Gr’_ner D, Bauer N, Nwaeburu CC, Zhao Z, Gladkich J, Hoppe-Tichy T, Yefenof E, Hackert T, Strobel O, Herr I.	TGFβ, vimentin, Notch-1 and SOX-2 and E-cadherin, Ras/JNK				Frizzled-8 integrates Wnt-11 and transforming growth factor-Ô_ signaling in prostate cancer.	/pubmed/29717114	Murillo-Garz’_n V, Gorro’±o-Etxebarria I, ’Äkerfelt M, Puustinen MC, Sistonen L, Nees M, Carton J, Waxman J, Kypta RM.	FZD8 and TGFBR1, Wnt-11			Insulin-like growth factor binding protein 5 (IGFBP5) functions as a tumor suppressor in human melanoma cells.	/pubmed/26010068	Wang J, Ding N, Li Y, Cheng H, Wang D, Yang Q, Deng Y, Yang Y, Li Y, Ruan X, Xie F, Zhao H, Fang X.	IGFBP5, NANOG, SOX2, OCT4, KLF4, and CD133, VEGF and MMP9			miR-99a reveals two novel oncogenic proteins E2F2 and EMR2 and represses stemness in lung cancer.	/pubmed/29072692	Feliciano A, Garcia-Mayea Y, Jubierre L, Mir C, Hummel M, Castellvi J, Hern’ndez-Losa J, Paciucci R, Sansano I, Sun Y, Ram’_n Y Cajal S, Kondon H, Soriano A, Segura M, Lyakhovich A, LLeonart ME.	E2F2 and EMR2, miR-99a
A new role of the membrane-type matrix metalloproteinase 16 (MMP16/MT3-MMP) in neural crest cell migration.	/pubmed/28621422	Roth L, Kalev-Altman R, Monsonego-Ornan E, Sela-Donenfeld D.	MMP-16, Laminin, Cadherin										WWC3 inhibits epithelial-mesenchymal transition of lung cancer by activating Hippo-YAP signaling.	/pubmed/29780251	Han Q, Kremerskothen J, Lin X, Zhang X, Rong X, Zhang D, Wang E.	WWC3,YAP, LATS1		The Hedgehog Inhibitor Cyclopamine Reduces Ô_-Catenin-Tcf Transcriptional Activity, Induces E-Cadherin Expression, and Reduces Invasion in Colorectal Cancer Cells.	/pubmed/26393651	Qualtrough D, Rees P, Speight B, Williams AC, Paraskeva C.	Slug, Snail and Twist, E-cadherin, β-catenin				Inhibition of Hes1 enhances lapatinib sensitivity in gastric cancer sphere-forming cells.	/pubmed/28959362	Li L, Li Y, Wang L, Wu Z, Ma H, Shao J, Li D, Yu H, Nian W, Wang D.	Hes1, EGFR-TKI				High expression of fructose-bisphosphate aldolaseÎ¾A induces progression of renal cell carcinoma.	/pubmed/29693182	Huang Z, Hua Y, Tian Y, Qin C, Qian J, Bao M, Liu Y, Wang S, Cao Q, Ju X, Wang Z, Gu M.	ALDOA			Pregnancy associated plasma protein-A links pregnancy and melanoma progression by promoting cellular migration and invasion.	/pubmed/25940796	Prithviraj P, Anaka M, McKeown SJ, Permezel M, Walkiewicz M, Cebon J, Behren A, Jayachandran A.	IGFBP4, PAPPA, IGF1			SOX8 regulates cancer stem-like properties and cisplatin-induced EMT in tongue squamous cell carcinoma by acting on the Wnt/Ô_-catenin pathway.	/pubmed/29071717	Xie SL, Fan S, Zhang SY, Chen WX, Li QX, Pan GK, Zhang HQ, Wang WW, Weng B, Zhang Z, Li JS, Lin ZY.	SOX8, FZD7, Wnt/β-catenin
The technology of obtaining multipotent spheroids from limbal mesenchymal stromal cells for reparation of injured eye tissues.	/pubmed/29244939	Kosheleva NV, Saburina IN, Zurina IM, Gorkun AA, Borzenok SA, Nikishin DA, Kolokoltsova TD, Ustinova EE, Repin VS.	Oct4, Sox2, Nanog				TGFb						ARRDC1 and ARRDC3 act as tumor suppressors in renal cell carcinoma by facilitating YAP1 degradation.	/pubmed/29416926	Xiao J, Shi Q, Li W, Mu X, Peng J, Li M, Chen M, Huang H, Wang C, Gao K, Fan J.	ARRDC1; ARRDC3; YAP1		LZTFL1 suppresses lung tumorigenesis by maintaining differentiation of lung epithelial cells.	/pubmed/26364604	Wei Q, Chen ZH, Wang L, Zhang T, Duan L, Behrens C, Wistuba II, Minna JD, Gao B, Luo JH, Liu ZP.	LZTFL1				Terfenadine combined with epirubicin impedes the chemo-resistant human non-small cell lung cancer both in vitro and in vivo through EMT and Notch reversal.	/pubmed/28754458	An L, Li DD, Chu HX, Zhang Q, Wang CL, Fan YH, Song Q, Ma HD, Feng F, Zhao QC.	drug study				NANOGP8 is the key regulator of stemness, EMT, Wnt pathway, chemoresistance, and other malignant phenotypes in gastric cancer cells.	/pubmed/29689047	Ma X, Wang B, Wang X, Luo Y, Fan W.	NANOG1 and NANOGP8,			Methylation status of insulin-like growth factor-binding protein 7 concurs with the malignance of oral tongue cancer.	/pubmed/25880247	Chen LH, Liu DW, Chang JL, Chen PR, Hsu LP, Lin HY, Chou YF, Lee CF, Yang MC, Wen YH, Hsu WL, Weng CF.	IGFBP-7 , AKT/GSK3β/β-catenin			IL6 derived from cancer-associated fibroblasts promotes chemoresistance via CXCR7 in esophageal squamous cell carcinoma.	/pubmed/29059160	Qiao Y, Zhang C, Li A, Wang D, Luo Z, Ping Y, Zhou B, Liu S, Li H, Yue D, Zhang Z, Chen X, Shen Z, Lian J, Li Y, Wang S, Li F, Huang L, Wang L, Zhang B, Yu J, Qin Z, et al.	CXCR7, IL6
Transcriptional targets of TWIST1 in the cranial mesoderm regulate cell-matrix interactions and mesenchyme maintenance.	/pubmed/27546376	Bildsoe H, Fan X, Wilkie EE, Ashoti A, Jones VJ, Power M, Qin J, Wang J, Tam PPL, Loebel DAF.	Ddr2, Pcolce, Tgfbi				Title	URL	Description	Gene(s)			NEK2 promotes hepatocellular carcinoma migration and invasion through modulation of the epithelial-mesenchymal transition.	/pubmed/29399700	Zhang Y, Wang W, Wang Y, Huang X, Zhang Z, Chen B, Xie W, Li S, Shen S, Peng B.	nt, NF-κB, VEGF, Hippo,p53, NEK2.		Resveratrol inhibits the hedgehog signaling pathway and epithelial-mesenchymal transition and suppresses gastric cancer invasion and metastasis.	/pubmed/26137075	Gao Q, Yuan Y, Gan HZ, Peng Q.	Snail, E-cadherin and N-cadherin				Single factors alone can induce mesenchymal-like morphology, but not promote full EMT in breast cancer cell lines with different hormone statuses.	/pubmed/28734865	Tveitar’Çs MK, Reigstad I, Leiss L, Reed RK, Stuhr L.	TGF-β1 and Jagged-1, E-cadherin				A Positive Feed-Forward Loop between LncRNA-CYTOR and Wnt/Ô_-Catenin Signaling Promotes Metastasis of Colon Cancer.	/pubmed/29606502	Yue B, Liu C, Sun H, Liu M, Song C, Cui R, Qiu S, Zhong M.	CYTOR			IGFBP-rP1 suppresses epithelial-mesenchymal transition and metastasis in colorectal cancer.	/pubmed/25789970	Zhu S, Zhang J, Xu F, Xu E, Ruan W, Ma Y, Huang Q, Lai M.	IGFBP-rP1, TGF-β			Polymorphisms in genes related to epithelial-mesenchymal transition and risk of non-small cell lung cancer.	/pubmed/28968839	Xie K, Ye Y, Zeng Y, Gu J, Yang H, Wu X.	FOXF2
Comparison of P75 NTR-positive and -negative ectomesenchymal stem cell odontogenic differentiation through epithelial-mesenchymal interaction.	/pubmed/27038014	Xing Y, Nie X, Chen G, Wen X, Li G, Zhou X, Tian W, Liu L.	Smad4, DSP, DMP1				Hmga2 is required for neural crest cell specification in Xenopus laevis.	/pubmed/26806704	Macr’Œ S, Simula L, Pellarin I, Pegoraro S, Onorati M, Sgarra R, Manfioletti G, Vignali R.	HMGA1 and HMGA2, msx1, pax3 and snail2			Homeodomain-interacting protein kinase promotes tumorigenesis and metastatic cell behavior.	/pubmed/29208636	Blaquiere JA, Wong KKL, Kinsey SD, Wu J, Verheyen EM.	Hipk		A microRNA code for prostate cancer metastasis.	/pubmed/26073083	Bonci D, Coppola V, Patrizii M, Addario A, Cannistraci A, Francescangeli F, Pecci R, Muto G, Collura D, Bedini R, Zeuner A, Valtieri M, Sentinelli S, Benassi MS, Gallucci M, Carlini P, Piccolo S, De Maria R.	miR-15 and miR-16, miR-21				MicroRNA-26a and -26b inhibit lens fibrosis and cataract by negatively regulating Jagged-1/Notch signaling pathway.	/pubmed/28622289	Chen X, Xiao W, Chen W, Liu X, Wu M, Bo Q, Luo Y, Ye S, Cao Y, Liu Y.	microRNA (miR)-26a and miR-26b				Downregulation of miR-3127-5p promotes epithelial-mesenchymal transition via FZD4 regulation of Wnt/Ô_-catenin signaling in non-small-cell lung cancer.	/pubmed/29566281	Yang Y, Sun Y, Wu Y, Tang D, Ding X, Xu W, Su B, Gao W.	miR-3127-5p, FZD4			FAK activation is required for IGF1R-mediated regulation of EMT, migration, and invasion in mesenchymal triple negative breast cancer cells.	/pubmed/25749031	Taliaferro-Smith L, Oberlick E, Liu T, McGlothen T, Alcaide T, Tobin R, Donnelly S, Commander R, Kline E, Nagaraju GP, Havel L, Marcus A, Nahta R, O'Regan R.	IGF1R and FAK			Adrenaline promotes epithelial-to-mesenchymal transition via HuR-TGFÔ_ regulatory axis in pancreatic cancer cells and the implication in cancer prognosis.	/pubmed/28965949	Pu J, Zhang X, Luo H, Xu L, Lu X, Lu J.	Smad2/3, HuR-TGFβ
Th-MYCN mice with caspase-8 deficiency develop advanced neuroblastoma with bone marrow metastasis.	/pubmed/23536557	Teitz T, Inoue M, Valentine MB, Zhu K, Rehg JE, Zhao W, Finkelstein D, Wang YD, Johnson MD, Calabrese C, Rubinstein M, Hakem R, Weiss WA, Lahti JM.	TGF-β, caspase-8, (miR-7a, miR-29b?)				TGF-Ô_-Induced Transcription Sustains Amoeboid Melanoma Migration and Dissemination.	/pubmed/26526369	Cantelli G, Orgaz JL, Rodriguez-Hernandez I, Karagiannis P, Maiques O, Matias-Guiu X, Nestle FO, Marti RM, Karagiannis SN, Sanz-Moreno V.	SMAD2, CITED1			YAP-Dependent AXL Overexpression Mediates Resistance to EGFR Inhibitors in NSCLC.	/pubmed/29136529	Ghiso E, Migliore C, Ciciriello V, Morando E, Petrelli A, Corso S, De Luca E, Gatti G, Volante M, Giordano S.	EGFR, YAP/AXL		Gli1 promotes transforming growth factor-beta1- and epidermal growth factor-induced epithelial to mesenchymal transition in pancreatic cancer cells.	/pubmed/25979438	Liu Q, Sheng W, Dong M, Dong X, Dong Q, Li F.	MMP9, Gli1, Vimentin , E-cadherin				Notch Inhibitor PF-03084014 Inhibits Hepatocellular Carcinoma Growth and Metastasis via Suppression of Cancer Stemness due to Reduced Activation of Notch1-Stat3.	/pubmed/28522590	Wu CX, Xu A, Zhang CC, Olson P, Chen L, Lee TK, Cheung TT, Lo CM, Wang XQ.	Notch-Stat3				Frizzled7 Promotes Epithelial-to-mesenchymal Transition and Stemness Via Activating Canonical Wnt/Ô_-catenin Pathway in Gastric Cancer.	/pubmed/29559846	Li G, Su Q, Liu H, Wang D, Zhang W, Lu Z, Chen Y, Huang X, Li W, Zhang C, He Y, Fu L, Bi J.	FZD7			MIG-7 and phosphorylated prohibitin coordinately regulate lung cancer invasion/metastasis.	/pubmed/25575814	Ho MY, Liang CM, Liang SM.	COX-2/PGE2, MEKK1, IKK/IκB/NF-κB, MIG-7			CXCR2 promotes breast cancer metastasis and chemoresistance via suppression of AKT1 and activation of COX2.	/pubmed/28964785	Xu H, Lin F, Wang Z, Yang L, Meng J, Ou Z, Shao Z, Di G, Yang G.	COX2, AKT1, P85α, E-cadherin, and β-catenin, CXCR2
TWIST1 is an ERK1/2 effector that promotes invasion and regulates MMP-1 expression in human melanoma cells.	/pubmed/23222305	Weiss MB, Abel EV, Mayberry MM, Basile KJ, Berger AC, Aplin AE.	MMP-1				The expression of TGF-Ô_3 for epithelial-mesenchyme transdifferentiated MEE in palatogenesis.	/pubmed/20967564	Nakajima A, Tanaka E, Ito Y, Maeno M, Iwata K, Shimizu N, Shuler CF.	TGF-β3, TβR-III, MMP13			Down regulation of lincRNA-p21 contributes to gastric cancer development through Hippo-independent activation of YAP.	/pubmed/28969031	Chen Y, Wei G, Xia H, Yu H, Tang Q, Bi F.	incRNA-p21, YAP		AUTS2 is a potential therapeutic target for pancreatic cancer patients with liver metastases.	/pubmed/25962312	Han Y, Ru GQ, Mou X, Wang HJ, Ma Y, He XL, Yan Z, Huang D.	AUTS2				Notch signaling is important for epithelial-mesenchymal transition induced by low concentrations of doxorubicin in osteosarcoma cell lines.	/pubmed/28454389	Yang J, Guo W, Wang L, Yu L, Mei H, Fang S, Chen A, Liu Y, Xia K, Liu G.	selective γ-secretase inhibitor DAPT				Multi-omics analysis identifies pathways and genes involved in diffuse-type gastric carcinogenesis induced by E-cadherin, p53, and Smad4 loss in mice.	/pubmed/29528141	Park JW, Kim MS, Voon DC, Kim SJ, Bae J, Mun DG, Ko SI, Kim HK, Lee SW, Kim DY.	E-cadherin, p53, and Smad4			Oncogenic Role of the Ec Peptide of the IGF-1Ec Isoform in Prostate Cancer.	/pubmed/25569803	Armakolas A, Kaparelou M, Dimakakos A, Papageorgiou E, Armakolas N, Antonopoulos A, Petraki C, Lekarakou M, Lelovas P, Stathaki M, Psarros C, Donta I, Galanos PS, Msaouel P, Gorgoulis VG, Koutsilieris M.	ERK1/2 , Pec			Up-regulation of chemokine receptor CCR4 is associated with Human Hepatocellular Carcinoma malignant behavior.	/pubmed/28959024	Cheng X, Wu H, Jin ZJ, Ma D, Yuen S, Jing XQ, Shi MM, Shen BY, Peng CH, Zhao R, Qiu WH.	CCR4 , MMP2, ERK/AKT
The expression of TGF-b3 for epithelial-mesenchyme transdifferentiated MEE in palatogenesis.	/pubmed/20967564	Nakajima A, Tanaka E, Ito Y, Maeno M, Iwata K, Shimizu N, Shuler CF.	TGF-β3,MMP13										Podocalyxin-Like Protein 1 Regulates TAZ Signaling and Stemness Properties in Colon Cancer.	/pubmed/28946619	Lee WY, Kuo CC, Lin BX, Cheng CH, Chen KC, Lin CW.	PODXL, TAZ		Tripartite motif 16 inhibits epithelial-mesenchymal transition and metastasis by down-regulating sonic hedgehog pathway in non-small cell lung cancer cells.	/pubmed/25843803	Huo X, Li S, Shi T, Suo A, Ruan Z, Yao Y.	TRIM16				Suppression of radiation-induced migration of non-small cell lung cancer through inhibition of Nrf2-Notch Axis.	/pubmed/28402268	Zhao Q, Mao A, Guo R, Zhang L, Yan J, Sun C, Tang J, Ye Y, Zhang Y, Zhang H.	Nrf2 and Notch1, E-cadherin, N-cadherin				Claudin-3 Inhibits Lung Squamous Cell Carcinoma Cell Epithelial-mesenchymal Transition and Invasion via Suppression of the Wnt/Ô_-catenin Signaling Pathway.	/pubmed/29511369	Che J, Yue D, Zhang B, Zhang H, Huo Y, Gao L, Zhen H, Yang Y, Cao B.	CLDN3, E-cadherin and Vimentin			Treatment with insulin-like growth factor 1 receptor inhibitor reverses hypoxia-induced epithelial-mesenchymal transition in non-small cell lung cancer.	/pubmed/25446090	Nurwidya F, Takahashi F, Kobayashi I, Murakami A, Kato M, Minakata K, Nara T, Hashimoto M, Yagishita S, Baskoro H, Hidayat M, Shimada N, Takahashi K.	IGF1R, HIF1α, IGFBP3			CRHR2/Ucn2 signaling is a novel regulator of miR-7/YY1/Fas circuitry contributing to reversal of colorectal cancer cell resistance to Fas-mediated apoptosis.	/pubmed/28929494	Pothoulakis C, Torre-Rojas M, Duran-Padilla MA, Gevorkian J, Zoras O, Chrysos E, Chalkiadakis G, Baritaki S.	CRHR2/Ucn2
Stabilization of ATF4 protein is required for the regulation of epithelial-mesenchymal transition of the avian neural crest.	/pubmed/20580702	Suzuki T, Osumi N, Wakamatsu Y.	Foxd3, Sox9, ATF4										A miR-135b-TAZ positive feedback loop promotes epithelial-mesenchymal transition (EMT) and tumorigenesis in osteosarcoma.	/pubmed/28823959	Shen S, Huang K, Wu Y, Ma Y, Wang J, Qin F, Ma J.	TAZ,miR-135b, GSK-3β;		Aberrant hedgehog signaling is responsible for the highly invasive behavior of a subpopulation of hepatoma cells.	/pubmed/25772244	Fan YH, Ding J, Nguyen S, Liu XJ, Xu G, Zhou HY, Duan NN, Yang SM, Zern MA, Wu J.	matrix metalloproteinase (MMP)-1/2/9				Activation of Notch pathway is linked with epithelial-mesenchymal transition in prostate cancer cells.	/pubmed/28388267	Zhang L, Sha J, Yang G, Huang X, Bo J, Huang Y.	Hey-1, Hey-2, Hes5, hes6, Survivin, C-cyc, GAPDH				Wnt-signaling enhances neural crest migration of melanoma cells and induces an invasive phenotype.	/pubmed/29454361	Sinnberg T, Levesque MP, Krochmann J, Cheng PF, Ikenberg K, Meraz-Torres F, Niessner H, Garbe C, Busch C.	BMP-2, β-catenin			Insulin-like growth factor-I induces epithelial to mesenchymal transition via GSK-3Ô_ and ZEB2 in the BGC-823 gastric cancer cell line.	/pubmed/25435948	Li H, Xu L, Zhao L, Ma Y, Zhu Z, Liu Y, Qu X.	PI3K/Akt-GSK-3β-ZEB2			CXC chemokineŠ—•7 inhibits growth and migration of oral tongue squamous cell carcinoma cells, mediated by the epithelialŠ—•mesenchymal transition signaling pathway.	/pubmed/28901471	Liu TJ, Guo JL, Xu X.	CXCR‑7, ERK, AKT
Antisense knockdown of the beta1 integrin subunit in the chicken embryo results in abnormal neural crest cell development.	/pubmed/15094128	Tucker RP.	ITGB1										IKBKE regulates cell proliferation and epithelial-mesenchymal transition of human malignant glioma via the Hippo pathway.	/pubmed/28548934	Lu J, Yang Y, Guo G, Liu Y, Zhang Z, Dong S, Nan Y, Zhao Z, Zhong Y, Huang Q.	IKBKE,YAP1,TEAD2		Sonic hedgehog (Shh) signaling promotes tumorigenicity and stemness via activation of epithelial-to-mesenchymal transition (EMT) in bladder cancer.	/pubmed/25728352	Islam SS, Mokhtari RB, Noman AS, Uddin M, Rahman MZ, Azadi MA, Zlotta A, van der Kwast T, Yeger H, Farhat WA.	E-cadherin and ZO-1, N-cadherin, CD133, Sox2, Nanog, and Oct4, CK5 and CK14, TGF-β1, Ki-67, Shh, Gli2				Notch-4 silencing inhibits prostate cancer growth and EMT via the NF-Ô_B pathway.	/pubmed/28374086	Zhang J, Kuang Y, Wang Y, Xu Q, Ren Q.	Notch-4, NF-κB p50 and p65				microRNA-335 inhibits colorectal cancer HCT116 cells growth and epithelial-mesenchymal transition (EMT) process by targeting Twist1.	/pubmed/29441907	Wang J, Wang X, Liu F, Fu Y.	miR-335 , Wnt5a and β-Catenin			Transcription factor PREP1 induces EMT and metastasis by controlling the TGF-Ô_-SMAD3 pathway in non-small cell lung adenocarcinoma.	/pubmed/25157139	Risolino M, Mandia N, Iavarone F, Dardaei L, Longobardi E, Fernandez S, Talotta F, Bianchi F, Pisati F, Spaggiari L, Harter PN, Mittelbronn M, Schulte D, Incoronato M, Di Fiore PP, Blasi F, Verde P.	PREP1, PBX1, SMAD3			Endothelial cells promote triple-negative breast cancer cell metastasis via PAI-1 and CCL5 signaling.	/pubmed/28899878	Zhang W, Xu J, Fang H, Tang L, Chen W, Sun Q, Zhang Q, Yang F, Sun Z, Cao L, Wang Y, Guan X.	CCR5, CCL5, PAI-1
													Hypoxia induces oncogene yes-associated protein 1 nuclear translocation to promote pancreatic ductal adenocarcinoma invasion via epithelial-mesenchymal transition.	/pubmed/28475017	Wei H, Xu Z, Liu F, Wang F, Wang X, Sun X, Li J.	Vimentin, mmp-2, mmp-13, E-cadherin, YAP1, Hif-1a		Gli-1 is crucial for hypoxia-induced epithelial-mesenchymal transition and invasion of breast cancer.	/pubmed/25501705	Lei J, Fan L, Wei G, Chen X, Duan W, Xu Q, Sheng W, Wang K, Li X.	HIF-1α, Gil-1, vimentin and E-cadherin				Down-regulation of E-cadherin enhances prostate cancer chemoresistance via Notch signaling.	/pubmed/28356132	Wang W, Wang L, Mizokami A, Shi J, Zou C, Dai J, Keller ET, Lu Y, Zhang J.	Vimentin and Claudin-1, E-cadherin, Snail				RHBDD1 promotes colorectal cancer metastasis through the Wnt signaling pathway and its downstream target ZEB1.	/pubmed/29426364	Zhang M, Miao F, Huang R, Liu W, Zhao Y, Jiao T, Lu Y, Wu F, Wang X, Wang H, Zhao H, Ju H, Miao S, Wang L, Song W.	RHBDD1, ZEB1			IMP3 expression is associated with epithelial-mesenchymal transition in breast cancer.	/pubmed/25031719	Su P, Hu J, Zhang H, Li W, Jia M, Zhang X, Wu X, Cheng H, Xiang L, Zhou G.	IMP3, Slug			LGR5 promotes hepatocellular carcinoma metastasis through inducting epithelial-mesenchymal transition.	/pubmed/28881613	Liu J, Yu GZ, Cheng XK, Li XD, Zeng XT, Ren XQ.	LGR5
													Hepatitis C virus NS4B protein induces epithelial-mesenchymal transition by upregulation of Snail.	/pubmed/28431572	Hu B, Xie S, Hu Y, Chen W, Chen X, Zheng Y, Wu X.	HCV NS4B, Snail		Sonic hedgehog-Gli1 signals promote epithelial-mesenchymal transition in ovarian cancer by mediating PI3K/AKT pathway.	/pubmed/25432698	Ke Z, Caiping S, Qing Z, Xiaojing W.	none found				Selumetinib Inhibits Melanoma Metastasis to Mouse Liver via Suppression of EMT-targeted Genes.	/pubmed/28179307	Ryu SH, Heo SH, Park EY, Choi KC, Ryu JW, Lee SH, Lee SW.	(ITGA5, JAG1, SERPINE1, ZEB1				NEK2 promotes hepatocellular carcinoma migration and invasion through modulation of the epithelial-mesenchymal transition.	/pubmed/29399700	Zhang Y, Wang W, Wang Y, Huang X, Zhang Z, Chen B, Xie W, Li S, Shen S, Peng B.	NIMA, NEK2, Wnt, NF-κB, VEGF, Hippo and p53			Ubiquitin ligase Cbl-b represses IGF-I-induced epithelial mesenchymal transition via ZEB2 and microRNA-200c regulation in gastric cancer cells.	/pubmed/24885194	Li H, Xu L, Li C, Zhao L, Ma Y, Zheng H, Li Z, Zhang Y, Wang R, Liu Y, Qu X.	ZEB2 and microRNA-200c			The HRH4 rs11662595 mutation is associated with histamine H(4) receptor dysfunction and with increased epithelial-to-mesenchymal transition progress in non-small cell lung cancer.	/pubmed/28847511	Cai WK, Zhang JB, Chen JH, Meng JR, Ma X, Zhang J, Zhou YL, Xu GL, He GH.	HRH4
PDGF													ETS (E26 transformation-specific) up-regulation of the transcriptional co-activator TAZ promotes cell migration and metastasis in prostate cancer.	/pubmed/28408625	Liu CY, Yu T, Huang Y, Cui L, Hong W.	ETV1, ETV4, ETV5, TAZ		GLI inhibitor GANT-61 diminishes embryonal and alveolar rhabdomyosarcoma growth by inhibiting Shh/AKT-mTOR axis.	/pubmed/25432075	Srivastava RK, Kaylani SZ, Edrees N, Li C, Talwelkar SS, Xu J, Palle K, Pressey JG, Athar M.	GANT-61, cyclins D1/2/3 & E, p21, AKT/mTOR				miR-598 inhibits metastasis in colorectal cancer by suppressing JAG1/Notch2 pathway stimulating EMT.	/pubmed/28161537	Chen J, Zhang H, Chen Y, Qiao G, Jiang W, Ni P, Liu X, Ma L.	miR-598				Lin28/microRNA-let-7a promotes metastasis under circumstances of hyperactive Wnt signaling in esophageal squamous cell carcinoma.	/pubmed/29393461	Ling R, Zhou Y, Zhou L, Dai D, Wu D, Mi L, Mao C, Chen D.	Lin28/let-7, VEGF-C and MMP9			Osthole inhibits insulin-like growth factor-1-induced epithelial to mesenchymal transition via the inhibition of PI3K/Akt signaling pathway in human brain cancer cells.	/pubmed/24828835	Lin YC, Lin JC, Hung CM, Chen Y, Liu LC, Chang TC, Kao JY, Ho CT, Way TD.	IGF-1, Akt and GSK3β			Inhibitory effects of 3,3'-diindolylmethane on epithelial-mesenchymal transition induced by endocrine disrupting chemicals in cellular and xenograft mouse models of breast cancer.	/pubmed/28844962	Lee GA, Hwang KA, Choi KC.	CXCR4, CXCL12
Title	URL	Description	Gene(s)										Furin promotes epithelial-mesenchymal transition in pancreatic cancer cells via Hippo-YAP pathway.	/pubmed/28259973	Zhang Y, Zhou M, Wei H, Zhou H, He J, Lu Y, Wang D, Chen B, Zeng J, Peng W, Du F, Gong A, Xu M.	E-Cadherin, N-Cadherin, Vimentin, Furin, YAP		Significance of glioma-associated oncogene homolog 1 (GLI1) expression in claudin-low breast cancer and crosstalk with the nuclear factor kappa-light-chain-enhancer of activated B cells (NFÔ_B) pathway.	/pubmed/25252859	Colavito SA, Zou MR, Yan Q, Nguyen DX, Stern DF.	HER2, NFκB, p65				Essential role of Notch4/STAT3 signaling in epithelial-mesenchymal transition of tamoxifen-resistant human breast cancer.	/pubmed/28108315	Bui QT, Im JH, Jeong SB, Kim YM, Lim SC, Kim B, Kang KW.	STAT3				Dual roles of miR-374a by modulated c-Jun respectively targets CCND1-inducing PI3K/AKT signal and PTEN-suppressing Wnt/Ô_-catenin signaling in non-small-cell lung cancer.	/pubmed/29362431	Zhao M, Xu P, Liu Z, Zhen Y, Chen Y, Liu Y, Fu Q, Deng X, Liang Z, Li Y, Lin X, Fang W.	PI3K/AKT, Ras, miR-374a, c-Jun, Wnt/β-catenin			Targeting insulin-like growth factor 1 receptor inhibits pancreatic cancer growth and metastasis.	/pubmed/24809702	Subramani R, Lopez-Valdez R, Arumugam A, Nandy S, Boopalan T, Lakshmanaswamy R.	IGF-1R, AKT/PI3K, MAPK, JAK/STAT			The CCR2 3'UTR functions as a competing endogenous RNA to inhibit breast cancer metastasis.	/pubmed/28818997	Hu J, Li X, Guo X, Guo Q, Xiang C, Zhang Z, Xing Y, Xi T, Zheng L.	CCL2, CCR2, STARD13
Pdgf1aa regulates zebrafish neural crest cells migration through Hif-1 in an oxygen-independent manner.	/pubmed/30031069	Espina JA, Marchant CL, De Ferrari GV, Reyes AE.	Hif-1α										Hippo signaling promotes JNK-dependent cell migration.	/pubmed/28174264	Ma X, Wang H, Ji J, Xu W, Sun Y, Li W, Zhang X, Chen J, Xue L.	Hippo, JNK,YAP,mmp1,Rox8		Network modeling of TGFÔ_ signaling in hepatocellular carcinoma epithelial-to-mesenchymal transition reveals joint sonic hedgehog and Wnt pathway activation.	/pubmed/25189528	Steinway SN, Za’±udo JG, Ding W, Rountree CB, Feith DJ, Loughran TP Jr, Albert R.	E-cadherin, TGFβ				Rap1A promotes ovarian cancer metastasis via activation of ERK/p38 and notch signaling.	/pubmed/27925454	Lu L, Wang J, Wu Y, Wan P, Yang G.	Rap1A, MAPK, MMP9, DAPT, ERK				PCDHGA9 acts as a tumor suppressor to induce tumor cell apoptosis and autophagy and inhibit the EMT process in human gastric cancer.	/pubmed/29348665	Weng J, Xiao J, Mi Y, Fang X, Sun Y, Li S, Qin Z, Li X, Liu T, Zhao S, Zhou L, Wen Y.	PCDHGA9, pSmad2/3, β-catenin			The Mu opioid receptor promotes opioid and growth factor-induced proliferation, migration and Epithelial Mesenchymal Transition (EMT) in human lung cancer.	/pubmed/24662916	Lennon FE, Mirzapoiazova T, Mambetsariev B, Poroyko VA, Salgia R, Moss J, Singleton PA.	Src, Gab-1, PI3K, Akt and STAT3, MOR			Leucine-rich repeat-containing G protein-coupled receptor 4 (Lgr4) is necessary for prostate cancer metastasis via epithelial-mesenchymal transition.	/pubmed/28768769	Luo W, Tan P, Rodriguez M, He L, Tan K, Zeng L, Siwko S, Liu M.	LGR4 , ZEB, Twist, and Snail
PDGF controls contact inhibition of locomotion by regulating N-cadherin during neural crest migration.	/pubmed/28526750	Bahm I, Barriga EH, Frolov A, Theveneau E, Frankel P, Mayor R.	N-cadherin, PDGF, PDGFR										TAp63 suppresses mammary tumorigenesis through regulation of the Hippo pathway.	/pubmed/27869165	Su X, Napoli M, Abbas HA, Venkatanarayan A, Bui NHB, Coarfa C, Gi YJ, Kittrell F, Gunaratne PH, Medina D, Rosen JM, Behbod F, Flores ER.	TAp63		Sonic hedgehog-Gli1 signaling pathway regulates the epithelial mesenchymal transition (EMT) by mediating a new target gene, S100A4, in pancreatic cancer cells.	/pubmed/25072505	Xu X, Su B, Xie C, Wei S, Zhou Y, Liu H, Dai W, Cheng P, Wang F, Xu X, Guo C.	S100A2, S100A4, S100A6, S100A11, and S100A14 , S100A				Gamma secretase inhibitor impairs epithelial-to-mesenchymal transition induced by TGF-Ô_ in ovarian tumor cell lines.	/pubmed/27908834	Pazos MC, Abramovich D, Bechis A, Accialini P, Parborell F, Tesone M, Irusta G.	TGF-β, γ-secretase inhibitor DAP				Stress-inducible Protein-1 promotes metastasis of gastric cancer via Wnt/Ô_-catenin signaling pathway.	/pubmed/29335007	Huang L, Zhai E, Cai S, Lin Y, Liao J, Jin H, Peng S, Xu L, Chen M, Zeng Z.	STIP1, Wnt/β-catenin			IGFBP7, a novel tumor stroma marker, with growth-promoting effects in colon cancer through a paracrine tumor-stroma interaction.	/pubmed/24632618	Rupp C, Scherzer M, Rudisch A, Unger C, Haslinger C, Schweifer N, Artaker M, Nivarthi H, Moriggl R, Hengstschl’_ger M, Kerjaschki D, Sommergruber W, Dolznig H, Garin-Chesa P.	IGFBP7, TGFβ			High expression of GPR116 indicates poor survival outcome and promotes tumor progression in colorectal carcinoma.	/pubmed/28624786	Yang L, Lin XL, Liang W, Fu SW, Lin WF, Tian XQ, Gao YJ, Chen HY, Dai J, Ge ZZ.	GPR116, AKT/EKR
Notochordal and foregut abnormalities correlate with elevated neural crest apoptosis in Patch embryos.	/pubmed/21557455	Snider P, Simmons O, Rogers R, Young R, Gosnell M, Conway SJ.	PDGFRα, Shh										Notch3 inhibits epithelial-mesenchymal transition by activating Kibra-mediated Hippo/YAP signaling in breast cancer epithelial cells.	/pubmed/27841855	Zhang X, Liu X, Luo J, Xiao W, Ye X, Chen M, Li Y, Zhang GJ.	Notch3		A novel antiŠ—•cancer effect of resveratrol: reversal of epithelialŠ—•mesenchymal transition in prostate cancer cells.	/pubmed/25069516	Li J, Chong T, Wang Z, Chen H, Li H, Cao J, Zhang P, Li H.	lipopolysaccharide (LPS), Gli1				Activation of Notch1 synergizes with multiple pathways in promoting castration-resistant prostate cancer.	/pubmed/27694579	Stoyanova T, Riedinger M, Lin S, Faltermeier CM, Smith BA, Zhang KX, Going CC, Goldstein AS, Lee JK, Drake JM, Rice MA, Hsu EC, Nowroozizadeh B, Castor B, Orellana SY, Blum SM, Cheng D, Pienta KJ, Reiter RE, Pitteri SJ, Huang J, Witte ON.	Notch homolog 1				The plant alkaloid tetrandrine inhibits metastasis via autophagy-dependent Wnt/Ô_-catenin and metastatic tumor antigen 1 signaling in human liver cancer cells.	/pubmed/29334999	Zhang Z, Liu T, Yu M, Li K, Li W.	MTA1			Maintenance of stemness in oxaliplatin-resistant hepatocellular carcinoma is associated with increased autocrine of IGF1.	/pubmed/24632571	Bu Y, Jia QA, Ren ZG, Zhang JB, Jiang XM, Liang L, Xue TC, Zhang QB, Wang YH, Zhang L, Xie XY, Tang ZY.	insulin-like growth factor 1			FPR2 promotes invasion and metastasis of gastric cancer cells and predicts the prognosis of patients.	/pubmed/28600569	Hou XL, Ji CD, Tang J, Wang YX, Xiang DF, Li HQ, Liu WW, Wang JX, Yan HZ, Wang Y, Zhang P, Cui YH, Wang JM, Bian XW, Liu W.	FPR2, ERK1/2, MEK
													Comparative Gene Expression Profiling of Primary and Metastatic Renal Cell Carcinoma Stem Cell-Like Cancer Cells.	/pubmed/27812180	Khan MI, Czarnecka AM, Lewicki S, Helbrecht I, Brodaczewska K, Koch I, Zdanowski R, KrÌ_l M, Szczylik C.	Oct-4,Nanog. TGF-β, Wnt/β-catenine, Rap1g, PI3K-Akt , ERBB2, TNF, Hippo		Rottlerin suppresses growth of human pancreatic tumors in nude mice, and pancreatic cancer cells isolated from Kras(G12D) mice.	/pubmed/25050737	Huang M, Tang SN, Upadhyay G, Marsh JL, Jackman CP, Srivastava RK, Shankar S.	Bcl-2, cyclin D1, CDK2 and CDK6, rottlerin				ATG4A promotes tumor metastasis by inducing the epithelial-mesenchymal transition and stem-like properties in gastric cells.	/pubmed/27276686	Yang SW, Ping YF, Jiang YX, Luo X, Zhang X, Bian XW, Yu PW.	ATG4A, DAPT				LncRNA-NEF antagonized epithelial to mesenchymal transition and cancer metastasis via cis-regulating FOXA2 and inactivating Wnt/Ô_-catenin signaling.	/pubmed/29311643	Liang WC, Ren JL, Wong CW, Chan SO, Waye MM, Fu WM, Zhang JF.	FOXA2, lncRNA-NEF, GSK3β			Activation of snail and EMT-like signaling via the IKKÔ±Ô_/NF-Ô_B pathway in Apicidin-resistant HA22T hepatocellular carcinoma cells.	/pubmed/24495179	Tu CC, Cheng LH, Hsu HH, Chen LM, Lin YM, Chen MC, Lee NH, Tsai FJ, Huang CY, Wu WJ.	GSK3-β, Snail, IKKαβ/NF-κB, MMP-2			Wnt is necessary for mesenchymal to epithelial transition in colorectal cancer cells.	/pubmed/28560804	Schwab RHM, Amin N, Flanagan DJ, Johanson TM, Phesse TJ, Vincan E.	PORC, Frizzled7 , Wnt2B
													The nucleo-junctional interplay of the cellular prion protein: A new partner in cancer-related signaling pathways?	/pubmed/27216988	Rousset M, Leturque A, Thenet S.	PrPc, γ-catenin, β-catenin, TCF7L2,		Down-regulation of Gli-1 inhibits hepatocellular carcinoma cell migration and invasion.	/pubmed/24792036	Chen JS, Li HS, Huang JQ, Zhang LJ, Chen XL, Wang Q, Lei J, Feng JT, Liu Q, Huang XH.	(MMP)-2 and MMP-9, Gli-1				Targeting aberrant expression of Notch-1 in ALDH(+) cancer stem cells in breast cancer.	/pubmed/27753148	Pal D, Kolluru V, Chandrasekaran B, Baby BV, Aman M, Suman S, Sirimulla S, Sanders MA, Alatassi H, Ankem MK, Damodaran C.	ALDH				The natural compound Jatrophone interferes with Wnt/Ô_-catenin signaling and inhibits proliferation and EMT in human triple-negative breast cancer.	/pubmed/29281678	Fatima I, El-Ayachi I, Taotao L, Lillo MA, Krutilina RI, Seagroves TN, Radaszkiewicz TW, Hutnan M, Bryja V, Krum SA, Rivas F, Miranda-Carboni GA.	AXIN2, HMGA2, MYC, PCNA and CCND1			IGFBP3 promotes esophageal cancer growth by suppressing oxidative stress in hypoxic tumor microenvironment.	/pubmed/24482736	Natsuizaka M, Kinugasa H, Kagawa S, Whelan KA, Naganuma S, Subramanian H, Chang S, Nakagawa KJ, Rustgi NL, Kita Y, Natsugoe S, Basu D, Gimotty PA, Klein-Szanto AJ, Diehl JA, Nakagawa H.	IGFBP3, ROS, CD44H			Human MSCs promotes colorectal cancer epithelial-mesenchymal transition and progression via CCL5/Ô_-catenin/Slug pathway.	/pubmed/28542126	Chen K, Liu Q, Tsang LL, Ye Q, Chan HC, Sun Y, Jiang X.	CCL5/β-catenin/Slug/CCR1
EGF													Twist-mediated Epithelial-mesenchymal Transition Promotes Breast Tumor Cell Invasion via Inhibition of Hippo Pathway.	/pubmed/27094683	Wang Y, Liu J, Ying X, Lin PC, Zhou BP.	TWIST,PAR1		Hedgehog/Gli promotes epithelial-mesenchymal transition in lung squamous cell carcinomas.	/pubmed/24758269	Yue D, Li H, Che J, Zhang Y, Tseng HH, Jin JQ, Luh TM, Giroux-Leprieur E, Mo M, Zheng Q, Shi H, Zhang H, Hao X, Wang C, Jablons DM, He B.	E-Cadherin and β-Catenin				[Role of HIF-induced EMT in invasion andŠ—åmetastasis of tumor].	/pubmed/27600018	Chen Y, Shi Y, Dai G.	TGF-β, Notch, and Wnt/β-catenin				Suppression of STAT3 NH(2) -terminal domain chemosensitizes medulloblastoma cells by activation of protein inhibitor of activated STAT3 via de-repression by microRNA-21.	/pubmed/29280516	Ray S, Coulter DW, Gray SD, Sughroue JA, Roychoudhury S, McIntyre EM, Chaturvedi NK, Bhakat KK, Joshi SS, McGuire TR, Sharp JG.	Stat3 , Rac1			Epithelial-mesenchymal transition and its regulators are major targets of triple-negative breast cancer.	/pubmed/24152786	Al Moustafa AE.	c-Met			Chemokine (CŠ—•C motif) ligand 21/CŠ—•C chemokine receptor type 7 triggers migration and invasion of human lung cancer cells by epithelialŠ—•mesenchymal transition via the extracellular signalŠ—•regulated kinase signaling pathway.	/pubmed/28487957	Zhong G, Chen L, Yin R, Qu Y, Bao Y, Xiao Q, Zhang Z, Shen Y, Li C, Xu Y, Zou Z, Tian H.	CCL21/CCR7, CCL21, Slug and Vimentin
Title	URL	Description	Gene(s)										ZEB1 turns into a transcriptional activator by interacting with YAP1 in aggressive cancer types.	/pubmed/26876920	Lehmann W, Mossmann D, Kleemann J, Mock K, Meisinger C, Brummer T, Herr R, Brabletz S, Stemmler MP, Brabletz T.	ZEB1/YAP		The Activation of Ô_1-integrin by Type I Collagen Coupling with the Hedgehog Pathway Promotes the Epithelial-Mesenchymal Transition in Pancreatic Cancer.	/pubmed/24720337	Duan W, Ma J, Ma Q, Xu Q, Lei J, Han L, Li X, Wang Z, Wu Z, Lv S, Ma Z, Liu M, Wang F, Wu E.	β1-integrin, focal adhesion kinase [FAK], AKT, and ERK)				Notch1 regulates invasion and metastasis of head and neck squamous cell carcinoma by inducing EMT through c-Myc.	/pubmed/27595504	Inamura N, Kimura T, Wang L, Yanagi H, Tsuda M, Tanino M, Nishihara H, Fukuda S, Tanaka S.	c-Myc				CUL4B promotes metastasis and proliferation in pancreatic cancer cells by inducing epithelial-mesenchymal transition via the Wnt/Ô_-catenin signaling pathway.	/pubmed/29274277	He YM, Xiao YS, Wei L, Zhang JQ, Peng CH.	CUL4B, Wnt, β-catenin, LEF-1, c-Jun, Cyclin D1, N-cadherin, Vimentin, Snail, and ZEB1			Expression profile of microRNA-200 family in hepatocellular carcinoma with bile duct tumor thrombus.	/pubmed/24135722	Yeh TS, Wang F, Chen TC, Yeh CN, Yu MC, Jan YY, Chen MF.	miR-200c and miR-141			G protein-coupled receptor GPR19 regulates E-cadherin expression and invasion of breast cancer cells.	/pubmed/28476646	Rao A, Herr DR.	GPR19, ERK/MAPK
Reprogramming Postnatal Human Epidermal Keratinocytes Toward Functional Neural Crest Fates.	/pubmed/28142205	Bajpai VK, Kerosuo L, Tseropoulos G, Cummings KA, Wang X, Lei P, Liu B, Liu S, Popescu GK, Bronner ME, Andreadis ST.	KRT14										Cullin 4A (CUL4A), a direct target of miR-9 and miR-137, promotes gastric cancer proliferation and invasion by regulating the Hippo signaling pathway.	/pubmed/26840256	Deng J, Lei W, Xiang X, Zhang L, Lei J, Gong Y, Song M, Wang Y, Fang Z, Yu F, Feng M, Sun Z, Chen J, Zhan Z, Xiong J.	CUL4A,Hippo, miR-137; miR-9		Embelin suppresses growth of human pancreatic cancer xenografts, and pancreatic cancer cells isolated from KrasG12D mice by inhibiting Akt and Sonic hedgehog pathways.	/pubmed/24694877	Huang M, Tang SN, Upadhyay G, Marsh JL, Jackman CP, Shankar S, Srivastava RK.	Ki67, PCNA and Bcl-2, cyclin D1, CDK2, and CDK6, COX-2, VEGF, VEGFR, and IL-8, Snail, Slug, and ZEB1				NUMB negatively regulates the epithelial-mesenchymal transition of triple-negative breast cancer by antagonizing Notch signaling.	/pubmed/27506933	Zhang J, Shao X, Sun H, Liu K, Ding Z, Chen J, Fang L, Su W, Hong Y, Li H, Li H.	NUMB, p53				miR-302b inhibits tumorigenesis by targeting EphA2 via Wnt/ Ô_-catenin/EMT signaling cascade in gastric cancer.	/pubmed/29273006	Huang J, He Y, Mcleod HL, Xie Y, Xiao D, Hu H, Chen P, Shen L, Zeng S, Yin X, Ge J, Li L, Tang L, Ma J, Chen Z.	EphA2, miR-302b			IGFBP-5 enhances epithelial cell adhesion and protects epithelial cells from TGFÔ_1-induced mesenchymal invasion.	/pubmed/24120850	Vijayan A, Guha D, Ameer F, Kaziri I, Mooney CC, Bennett L, Sureshbabu A, Tonner E, Beattie J, Allan GJ, Edwards J, Flint DJ.	IGFBP-5, TGFβ1			HIC1 loss promotes prostate cancer metastasis by triggering epithelial-mesenchymal transition.	/pubmed/28466555	Hao M, Li Y, Wang J, Qin J, Wang Y, Ding Y, Jiang M, Sun X, Zu L, Chang K, Lin G, Du J, Korinek V, Ye DW, Wang J.	HIC1, CXCL12-CXCR4, ERK 1/2
LIF-JAK1-STAT3 signaling delays contact inhibition of human corneal endothelial cells.	/pubmed/25695744	Liu X, Tseng SC, Zhang MC, Chen SY, Tighe S, Lu WJ, Zhu YT.	E2F2, JAK1, LIF, proliferation, p16INK4a, STAT3 (Repeat, was under IGF row "35")										AMOTL1 Promotes Breast Cancer Progression and Is Antagonized by Merlin.	/pubmed/26806348	Couderc C, Boin A, Fuhrmann L, Vincent-Salomon A, Mandati V, Kieffer Y, Mechta-Grigoriou F, Del Maestro L, Chavrier P, Vallerand D, Brito I, Dubois T, De Koning L, Bouvard D, Louvard D, Gautreau A, Lallemand D.	AMOTL1, YAP		Embelin suppresses pancreatic cancer growth by modulating tumor immune microenvironment.	/pubmed/24389175	Marsh JL, Jackman CP, Tang SN, Shankar S, Srivastava RK.	Bcl-2, cyclin D1, CDK2 and CDK6, IL-6 and IL-8, Snail, Slug and Zeb1				Fascin Is Critical for the Maintenance of Breast Cancer Stem Cell Pool Predominantly via the Activation of the Notch Self-Renewal Pathway.	/pubmed/27502039	Barnawi R, Al-Khaldi S, Majed Sleiman G, Sarkar A, Al-Dhfyan A, Al-Mohanna F, Ghebeh H, Al-Alwan M.	Oct4, Nanog, Sox2, and Klf4				LGR4 modulates breast cancer initiation, metastasis, and cancer stem cells.	/pubmed/29269400	Yue Z, Yuan Z, Zeng L, Wang Y, Lai L, Li J, Sun P, Xue X, Qi J, Yang Z, Zheng Y, Fang Y, Li D, Siwko S, Li Y, Luo J, Liu M.	LGR4, GPR48, SLUG			Stromal EGF and igf-I together modulate plasticity of disseminated triple-negative breast tumors.	/pubmed/23689072	Casta’±o Z, Marsh T, Tadipatri R, Kuznetsov HS, Al-Shahrour F, Paktinat M, Greene-Colozzi A, Nilsson B, Richardson AL, McAllister SS.	IGF-I, EGF			BMP2 promotes proliferation and invasion of nasopharyngeal carcinoma cells via mTORC1 pathway.	/pubmed/28455969	Wang MH, Zhou XM, Zhang MY, Shi L, Xiao RW, Zeng LS, Yang XZ, Zheng XFS, Wang HY, Mai SJ.	BMP2, mTOR, S6K and 4EBP1
BMP2 and FGF2 cooperate to induce neural-crest-like fates from fetal and adult CNS stem cells.	/pubmed/16339968	Sailer MH, Hazel TG, Panchision DM, Hoeppner DJ, Schwab ME, McKay RD.	BMP2										RASSF1A Suppresses the Invasion and Metastatic Potential of Human Non-Small Cell Lung Cancer Cells by Inhibiting YAP Activation through the GEF-H1/RhoB Pathway.	/pubmed/26759237	Dubois F, Keller M, Calvayrac O, Soncin F, Hoa L, Hergovich A, Parrini MC, MaziÌ¬res J, Vaisse-Lesteven M, Camonis J, Levallet G, Zalcman G.	RASSF1 , YAP		Epithelial-mesenchymal transition - activating transcription factors - multifunctional regulators in cancer.	/pubmed/24179606	Garg M.	Wnt, Notch, hedgehog				Requirement of HDAC6 for activation of Notch1 by TGF-Ô_1.	/pubmed/27499032	Deskin B, Lasky J, Zhuang Y, Shan B.	HEY-1 and HES-1, TGFβ-1, HDAC6				Homeodomain-interacting protein kinase promotes tumorigenesis and metastatic cell behavior.	/pubmed/29208636	Blaquiere JA, Wong KKL, Kinsey SD, Wu J, Verheyen EM.	Hipk , Hippo, Notch and JNK			The expression and significance of insulin-like growth factor-1 receptor and its pathway on breast cancer stem/progenitors.	/pubmed/23663564	Chang WW, Lin RJ, Yu J, Chang WY, Fu CH, Lai A, Yu JC, Yu AL.	IGF-1R , mTOR			CXCR6 predicts poor prognosis in gastric cancer and promotes tumor metastasis through epithelial-mesenchymal transition.	/pubmed/28440473	Jin JJ, Dai FX, Long ZW, Cai H, Liu XW, Zhou Y, Hong Q, Dong QZ, Wang YN, Huang H.	CXCL16/CXCR6
													PAR1 participates in the ability of multidrug resistance and tumorigenesis by controlling Hippo-YAP pathway.	/pubmed/26431277	Fujimoto D, Ueda Y, Hirono Y, Goi T, Yamaguchi A.	PAR1, YAP		[Effects of inhibition of Hedgehog signaling pathway for transforming growth factor-Ô_-induced epithelial-mesenchymal transition].	/pubmed/24169291	Chen JH, Wu H, Ma JP, Chen CQ, Cai SR, He YL.	TGF-β, vimentin, e-cadherin				Radiation driven epithelial-mesenchymal transition is mediated by Notch signaling in breast cancer.	/pubmed/27462787	Kim RK, Kaushik N, Suh Y, Yoo KC, Cui YH, Kim MJ, Lee HJ, Kim IG, Lee SJ.	IL-6/JAK/STAT3				Silencing of CEMIP suppresses Wnt/Ô_-catenin/Snail signaling transduction and inhibits EMT program of colorectal cancer cells.	/pubmed/29173982	Liang G, Fang X, Yang Y, Song Y.	CEMIP			TMEPAI regulates EMT in lung cancer cells by modulating the ROS and IRS-1 signaling pathways.	/pubmed/23615405	Hu Y, He K, Wang D, Yuan X, Liu Y, Ji H, Song J.	TMEPA, ROS, TGF-β1, IRS-1			CCR7 mediates human breast cancer cell invasion, migration by inducing epithelial-mesenchymal transition and suppressing apoptosis through AKT pathway.	/pubmed/28378417	Xu B, Zhou M, Qiu W, Ye J, Feng Q.	CCL19/CCR7
													Hippo transducer TAZ promotes epithelial mesenchymal transition and supports pancreatic cancer progression.	/pubmed/26416426	Xie D, Cui J, Xia T, Jia Z, Wang L, Wei W, Zhu A, Gao Y, Xie K, Quan M.	TAZ		LncRNA expression signatures of twist-induced epithelial-to-mesenchymal transition in MCF10A cells.	/pubmed/24113349	Hu P, Yang J, Hou Y, Zhang H, Zeng Z, Zhao L, Yu T, Tang X, Tu G, Cui X, Liu M.	WNT, MAPK, JAK/STAT, TGF-β, mTOR, Hedgehog and P53				MHP-1 inhibits cancer metastasis and restores topotecan sensitivity via regulating epithelial-mesenchymal transition and TGF-Ô_ signaling in human breast cancer cells.	/pubmed/27444351	Lin S, Lyu X, Yu J, Sun L, Du D, Lai Y, Li H, Wang Y, Zhang L, Yin H, Yuan S.	MHP-1, ALK5				Wnt5a promotes epithelial-to-mesenchymal transition and metastasis in non-small-cell lung cancer.	/pubmed/29054966	Wang B, Tang Z, Gong H, Zhu L, Liu X.	Wnt5a and ROR2			Hypoxia-inducing factors as master regulators of stemness properties and altered metabolism of cancer- and metastasis-initiating cells.	/pubmed/23301832	Mimeault M, Batra SK.	CXCR4, Oct-3/4, Nanog and Sox-2, VEGF			Tumor-derived CXCL5 promotes human colorectal cancer metastasis through activation of the ERK/Elk-1/Snail and AKT/GSK3Ô_/Ô_-catenin pathways.	/pubmed/28356111	Zhao J, Ou B, Han D, Wang P, Zong Y, Zhu C, Liu D, Zheng M, Sun J, Feng H, Lu A.	CXCL5/CXCR2, ERK/Elk-1/Snail, and β-catenin
													Increased TEAD4 expression and nuclear localization in colorectal cancer promote epithelial-mesenchymal transition and metastasis in a YAP-independent manner.	/pubmed/26387538	Liu Y, Wang G, Yang Y, Mei Z, Liang Z, Cui A, Wu T, Liu CY, Cui L.	TEAD4, Vimentin, CDH1, YAP		Significance and prognostic value of Gli-1 and Snail/E-cadherin expression in progressive gastric cancer.	/pubmed/24081672	Wang ZS, Shen Y, Li X, Zhou CZ, Wen YG, Jin YB, Li JK.	Snail and E-cadherin,				lincRNA-p21 inhibits invasion and metastasis of hepatocellular carcinoma through Notch signaling-induced epithelial-mesenchymal transition.	/pubmed/27391793	Jia M, Jiang L, Wang YD, Huang JZ, Yu M, Xue HZ.	lincRNA-p21				Msi2 plays a carcinogenic role in esophageal squamous cell carcinoma via regulation of the Wnt/Ô_-catenin and Hedgehog signaling pathways.	/pubmed/29054489	Li Z, Jin H, Mao G, Wu L, Guo Q.	Msi2			Dichotomy effects of Akt signaling in breast cancer.	/pubmed/22917467	Peng Z, Weber JC, Han Z, Shen R, Zhou W, Scott JR, Chan MW, Lin HJ.	Akt, PKB			Clinical implication of Frizzled 2 expression and its association with epithelial-to-mesenchymal transition in hepatocellular carcinoma.	/pubmed/28350091	Asano T, Yamada S, Fuchs BC, Takami H, Hayashi M, Sugimoto H, Fujii T, Tanabe KK, Kodera Y.	Wnt5b, Stat3, IL-6, Jak2 and Fzd2
													The Hippo pathway transcriptional co-activator, YAP, confers resistance to cisplatin in human oral squamous cell carcinoma.	/pubmed/25846049	Yoshikawa K, Noguchi K, Nakano Y, Yamamura M, Takaoka K, Hashimoto-Tamaoki T, Kishimoto H.	YAP, ATP7B, GST-π,ERCC1.		Tumor-stromal interactions with direct cell contacts enhance motility of non-small cell lung cancer cells through the hedgehog signaling pathway.	/pubmed/24023301	Choe C, Shin YS, Kim SH, Jeon MJ, Choi SJ, Lee J, Kim J.	α-SMA, SMAD3, SNAI1, GLI1				3,6-dihydroxyflavone suppresses the epithelial-mesenchymal transition in breast cancer cells by inhibiting the Notch signaling pathway.	/pubmed/27345219	Chen J, Chang H, Peng X, Gu Y, Yi L, Zhang Q, Zhu J, Mi M.	3,6-DHF, Notch1, NICD, Hes-1 and c-Myc				MiR-23a promotes TGF-Ô_1-induced EMT and tumor metastasis in breast cancer cells by directly targeting CDH1 and activating Wnt/Ô_-catenin signaling.	/pubmed/29050223	Ma F, Li W, Liu C, Li W, Yu H, Lei B, Ren Y, Li Z, Pang D, Qian C.	TGF-β1, miR-23a, CDH1			MEMO1, a new IRS1-interacting protein, induces epithelial-mesenchymal transition in mammary epithelial cells.	/pubmed/22824790	Sorokin AV, Chen J.	MEMO1			Osteotropism of neuroendocrine tumors: role of the CXCL12/ CXCR4 pathway in promoting EMT in vitro.	/pubmed/28186979	Cives M, Quaresmini D, Rizzo FM, Felici C, D'Oronzo S, Simone V, Silvestris F.	CXCL12/CXCR4,
													YAP1 Regulates OCT4 Activity and SOX2 Expression to Facilitate Self-Renewal and Vascular Mimicry of Stem-Like Cells.	/pubmed/25754111	Bora-Singhal N, Nguyen J, Schaal C, Perumal D, Singh S, Coppola D, Chellappan S.	Sox2,YAP1		The glioma-associated oncogene homolog 1 promotes epithelial--mesenchymal transition in human esophageal squamous cell cancer by inhibiting E-cadherin via Snail.	/pubmed/23788111	Min S, Xiaoyan X, Fanghui P, Yamei W, Xiaoli Y, Feng W.	E-cadherin, Vimentin, Gli1, Snail				The long non-coding RNA HOTAIR increases tumour growth and invasion in cervical cancer by targeting the Notch pathway.	/pubmed/27323817	Lee M, Kim HJ, Kim SW, Park SA, Chun KH, Cho NH, Song YS, Kim YT.	HOTAIR				Toosendanin suppresses oncogenic phenotypes of human gastric carcinoma SGCŠ—•7901 cells partly via miRŠ—•200aŠ—•mediated downregulation of Ô_-catenin pathway.	/pubmed/29048657	Wang G, Huang YX, Zhang R, Hou LD, Liu H, Chen XY, Zhu JS, Zhang J.	β-catenin , p‑AKT, p‑ERK and p‑GSK3β			MicroRNA-7 functions as an anti-metastatic microRNA in gastric cancer by targeting insulin-like growth factor-1 receptor.	/pubmed/22614005	Zhao X, Dou W, He L, Liang S, Tie J, Liu C, Li T, Lu Y, Mo P, Shi Y, Wu K, Nie Y, Fan D.	IGF1R, miR-7, Snail			CXCL12/CXCR4 axis induced miR-125b promotes invasion and confers 5-fluorouracil resistance through enhancing autophagy in colorectal cancer.	/pubmed/28176874	Yu X, Shi W, Zhang Y, Wang X, Sun S, Song Z, Liu M, Zeng Q, Cui S, Qu X.	miR-125b, CXCL12/CXCR4
													The Hippo transducer TAZ promotes epithelial to mesenchymal transition and cancer stem cell maintenance in oral cancer.	/pubmed/25704916	Li Z, Wang Y, Zhu Y, Yuan C, Wang D, Zhang W, Qi B, Qiu J, Song X, Ye J, Wu H, Jiang H, Liu L, Zhang Y, Song LN, Yang J, Cheng J.	TAZ		Ellagic acid inhibits human pancreatic cancer growth in Balb c nude mice.	/pubmed/23684930	Zhao M, Tang SN, Marsh JL, Shankar S, Srivastava RK.	COX-2, HIF1α, VEGF, VEGFR, IL-6 and IL-8, MMP-2 and MMP-9, phospho-Akt, Gli1, Gli2, Notch1, Notch3, and Hey1				COX-2 Induces Breast Cancer Stem Cells via EP4/PI3K/AKT/NOTCH/WNT Axis.	/pubmed/27301070	Majumder M, Xin X, Liu L, Tutunea-Fatan E, Rodriguez-Torres M, Vincent K, Postovit LM, Hess D, Lala PK.	ALDH1A, CD44, β-Catenin, NANOG, OCT3/4, SOX-2, COX-2				Inhibitor of Ô_-catenin and TCF (ICAT) promotes cervical cancer growth and metastasis by disrupting E-cadherin/Ô_-catenin complex.	/pubmed/29048651	Jiang Y, Ren W, Wang W, Xia J, Gou L, Liu M, Wan Q, Zhou L, Weng Y, He T, Zhang Y.	ICAT , E-cadherin/β-catenin			A cell-based small molecule screening method for identifying inhibitors of epithelial-mesenchymal transition in carcinoma.	/pubmed/22432005	Chua KN, Sim WJ, Racine V, Lee SY, Goh BC, Thiery JP.	ALK5, MEK, and SRC			A comparison of serum miRNAs influencing metastatic growth of EMT6 vs 4THM tumor cells in wild-type and CD200R1KO mice.	/pubmed/28160157	Gorczynski RM, Zhu F, Chen Z, Kos O, Khatri I.	miR155
													Ski regulates Hippo and TAZ signaling to suppress breast cancer progression.	/pubmed/25670202	Rashidian J, Le Scolan E, Ji X, Zhu Q, Mulvihill MM, Nomura D, Luo K.	Ski,TAZ,YAP		Curcumin reverses the epithelial-mesenchymal transition of pancreatic cancer cells by inhibiting the Hedgehog signaling pathway.	/pubmed/23563640	Sun XD, Liu XE, Huang DS.	Shh, GLI1, E-cadherin and vimentin, TGF-β1				Notch promotes tumor metastasis in a prostate-specific Pten-null mouse model.	/pubmed/27294523	Kwon OJ, Zhang L, Wang J, Su Q, Feng Q, Zhang XH, Mani SA, Paulter R, Creighton CJ, Ittmann MM, Xin L.	FOXC2				TOP2A induces malignant character of pancreatic cancer through activating Ô_-catenin signaling pathway.	/pubmed/29045811	Pei YF, Yin XM, Liu XQ.	TOP2A , miR-139\β-catenin			Ethanol inhibits B16-BL6 melanoma metastasis and cell phenotypes associated with metastasis.	/pubmed/22210715	Kushiro K, N’_’±ez NP.	Snai1, Kiss1			Association of Cytoplasmic CXCR4 With Loss of Epithelial Marker and Activation of ERK1/2 and AKT Signaling Pathways in Non-Small-Cell LungÎ¾Cancer.	/pubmed/28073681	Saba NF, Wang Y, Fu H, Koenig L, Khuri FR, Shin DM, Chen ZG.	CXCR4
													TAZ regulates cell proliferation and epithelial-mesenchymal transition of human hepatocellular carcinoma.	/pubmed/25495189	Xiao H, Jiang N, Zhou B, Liu Q, Du C.	TAZ, OCT4, Nanog, SOX2, N-cadherin, vimentin, Snail, Slug ,MMP-2, MMP-9		Nonclassical activation of Hedgehog signaling enhances multidrug resistance and makes cancer cells refractory to Smoothened-targeting Hedgehog inhibition.	/pubmed/23508962	Das S, Samant RS, Shevde LA.	SMOH, Akt-GSK3β, OPN				Inositol induces mesenchymal-epithelial reversion in breast cancer cells through cytoskeleton rearrangement.	/pubmed/27237097	Dinicola S, Fabrizi G, Masiello MG, Proietti S, Palombo A, Minini M, Harrath AH, Alwasel SH, Ricci G, Catizone A, Cucina A, Bizzarri M.	NF-kB, COX-2, and SNAI1, F-actin				TIPE1 suppresses invasion and migration through down-regulating Wnt/Ô_-catenin pathway in gastric cancer.	/pubmed/28994231	Liu W, Chen Y, Xie H, Guo Y, Ren D, Li Y, Jing X, Li D, Wang X, Zhao M, Zhu T, Wang Z, Wei X, Gao F, Wang X, Liu S, Zhang Y, Yi F.	TNFAIP8, TIPE1			Ob/ob serum promotes a mesenchymal cell phenotype in B16BL6 melanoma cells.	/pubmed/21879359	Kushiro K, N’_’±ez NP.	tPAI1, IL-6, TNF-α, and MCP-1, Snai1 and Twist			LGR5 Is a Gastric Cancer Stem Cell Marker Associated with Stemness and the EMT Signature Genes NANOG, NANOGP8, PRRX1, TWIST1, and BMI1.	/pubmed/28033430	Wang B, Chen Q, Cao Y, Ma X, Yin C, Jia Y, Zang A, Fan W.	NANOGP8, OCT4, SOX2, and AICDA, PRRX1, TWIST1, and BMI1
													Hypoxia induced E-cadherin involving regulators of Hippo pathway due to HIF-1ë± stabilization/nuclear translocation in bone metastasis from breast carcinoma.	/pubmed/25447306	Maroni P, Matteucci E, Drago L, Banfi G, Bendinelli P, Desiderio MA.	E-cadherin, HIF-1, Wwox		NPV-LDE-225 (Erismodegib) inhibits epithelial mesenchymal transition and self-renewal of glioblastoma initiating cells by regulating miR-21, miR-128, and miR-200.	/pubmed/23482671	Fu J, Rodova M, Nanta R, Meeker D, Van Veldhuizen PJ, Srivastava RK, Shankar S.	Nanog, Oct4, Sox2, and cMyc, (TRAIL)-R1/DR4, TRAIL-R2/DR5, and Fas, Bcl2				Notch4+ cancer stem-like cells promote the metastatic and invasive ability of melanoma.	/pubmed/27234159	Lin X, Sun B, Zhu D, Zhao X, Sun R, Zhang Y, Zhang D, Dong X, Gu Q, Li Y, Liu F.	Dtx4 , JAG2, DAPT				Kindlin-2 promotes hepatocellular carcinoma invasion and metastasis by increasing Wnt/Ô_-catenin signaling.	/pubmed/28969700	Lin J, Lin W, Ye Y, Wang L, Chen X, Zang S, Huang A.	Kindlin-2, Wnt/β-catenin			On how CCN6 suppresses breast cancer growth and invasion.	/pubmed/21842227	Huang W, Pal A, Kleer CG.	CCN6			miR-381 inhibited breast cancer cells proliferation, epithelial-to-mesenchymal transition and metastasis by targeting CXCR4.	/pubmed/28012397	Xue Y, Xu W, Zhao W, Wang W, Zhang D, Wu P.	miR-381, CXCR4
													TAZ promotes epithelial to mesenchymal transition via the upregulation of connective tissue growth factor expression in neuroblastoma cells.	/pubmed/25354978	Wang Q, Xu Z, An Q, Jiang D, Wang L, Liang B, Li Z.	TAZ,YAP, CTGF (TGF‑β, Smad3?)		Hedgehog signaling pathway regulates human pancreatic cancer cell proliferation and metastasis.	/pubmed/23292285	Hao K, Tian XD, Qin CF, Xie XH, Yang YM.	PI3K/AKT, Snail and Slug				Notch-Jagged signalling can give rise to clusters of cells exhibiting a hybrid epithelial/mesenchymal phenotype.	/pubmed/27170649	Boareto M, Jolly MK, Goldman A, Pietil’_ M, Mani SA, Sengupta S, Ben-Jacob E, Levine H, Onuchic JN.	Notch-Delta-Jagged				Knockdown of Tripartite Motif Containing 28 suppresses the migration, invasion and epithelial-mesenchymal transition in ovarian carcinoma cells through down-regulation of Wnt/Ô_-catenin signaling pathway.	/pubmed/28895414	Deng B, Zhang S, Zhang Y, Miao Y, Meng X, Guo K.	TRIM28 , (MMP)-2 and MMP-9 , TCF1, Axin 2			IGFBP-3 is a metastasis suppression gene in prostate cancer.	/pubmed/21697285	Mehta HH, Gao Q, Galet C, Paharkova V, Wan J, Said J, Sohn JJ, Lawson G, Cohen P, Cobb LJ, Lee KW.	IGFBP-3			CXCR4 is involved in CD133-induced EMT in non-small cell lung cancer.	/pubmed/28000861	Tu Z, Xie S, Xiong M, Liu Y, Yang X, Tembo KM, Huang J, Hu W, Huang X, Pan S, Liu P, Altaf E, Kang G, Xiong J, Zhang Q.	CD133 and CXCR4
													The ubiquitin E3 ligase ITCH enhances breast tumor progression by inhibiting the Hippo tumor suppressor pathway.	/pubmed/25350971	Salah Z, Itzhaki E, Aqeilan RI.	ITCH, YAP		The pan-deacetylase inhibitor panobinostat modulates the expression of epithelial-mesenchymal transition markers in hepatocellular carcinoma models.	/pubmed/23255907	DI Fazio P, Montalbano R, Quint K, Alinger B, Kemmerling R, Kiesslich T, Ocker M, Neureiter D.	cytokeratin (Ck) 7, Ck8, Ck18, Ck19, Ck20, vimentin, Smo, Ptc, CD133, Oct4 and β-catenin				Not all NOTCH Is Created Equal: The Oncogenic Role of NOTCH2 in Bladder Cancer and Its Implications for Targeted Therapy.	/pubmed/26769750	Hayashi T, Gust KM, Wyatt AW, Goriki A, J’_ger W, Awrey S, Li N, Oo HZ, Altamirano-Dimas M, Buttyan R, Fazli L, Matsubara A, Black PC.	NOTCH2, N2ICD				TET1 inhibits EMT of ovarian cancer cells through activating Wnt/Ô_-catenin signaling inhibitors DKK1 and SFRP2.	/pubmed/28851501	Duan H, Yan Z, Chen W, Wu Y, Han J, Guo H, Qiao J.	TET1, DKK1 and SFRP2			IGF-1 increases invasive potential of MCF 7 breast cancer cells and induces activation of latent TGF-Ô_1 resulting in epithelial to mesenchymal transition.	/pubmed/21535875	Walsh LA, Damjanovski S.	IGF-1, TGF-β1			Pro-metastatic intracellular signaling of the elaidic trans fatty acid.	/pubmed/27959384	Fujii K, Luo Y, Fujiwara-Tani R, Kishi S, He S, Yang S, Sasaki T, Ohmori H, Kuniyasu H.	GPR40, GPR120, c-SRC
													Molecular pathways: YAP and TAZ take center stage in organ growth and tumorigenesis.	/pubmed/23797907	Piccolo S, Cordenonsi M, Dupont S.	YAP, TAZ		Sonic advance: CCN1 regulates sonic hedgehog in pancreatic cancer.	/pubmed/23255052	Leask A.	CCN1				Actin-like 6A predicts poor prognosis of hepatocellular carcinoma and promotes metastasis and epithelial-mesenchymal transition.	/pubmed/26698646	Xiao S, Chang RM, Yang MY, Lei X, Liu X, Gao WB, Xiao JL, Yang LY.	ACTL6A, SOX2				Upregulation of GNL3 expression promotes colon cancer cell proliferation, migration, invasion and epithelial-mesenchymal transition via the Wnt/Ô_-catenin signaling pathway.	/pubmed/28849076	Tang X, Zha L, Li H, Liao G, Huang Z, Peng X, Wang Z.	GNL3, Wnt/β‑catenin			Klotho inhibits transforming growth factor-beta1 (TGF-beta1) signaling and suppresses renal fibrosis and cancer metastasis in mice.	/pubmed/21209102	Doi S, Zou Y, Togao O, Pastor JV, John GB, Wang L, Shiizaki K, Gotschall R, Schiavi S, Yorioka N, Takahashi M, Boothman DA, Kuro-o M.	TGF-β1, Klotho			Galectin-1 induces invasion and the epithelial-mesenchymal transition in human gastric cancer cells via non-canonical activation of the hedgehog signaling pathway.	/pubmed/27835885	Chong Y, Tang D, Gao J, Jiang X, Xu C, Xiong Q, Huang Y, Wang J, Zhou H, Shi Y, Wang D.	Gli-1, Gal-1, SMO
													MicroRNA-135b promotes lung cancer metastasis by regulating multiple targets in the Hippo pathway and LZTS1.	/pubmed/23695671	Lin CW, Chang YL, Chang YC, Lin JC, Chen CC, Pan SH, Wu CT, Chen HY, Yang SC, Hong TM, Yang PC.	TAZ, LATS2, β-TrCP, NDR2, LZTS1, miR-135b,		GANT-61 inhibits pancreatic cancer stem cell growth in vitro and in NOD/SCID/IL2R gamma null mice xenograft.	/pubmed/23200667	Fu J, Rodova M, Roy SK, Sharma J, Singh KP, Srivastava RK, Shankar S.	TRAIL-R1/DR4, TRAIL-R2/DR5 and Fas, Gli1, Gli2, Bcl-2, CCND2 and Zeb1				Twist induces epithelial-mesenchymal transition and cell motility in breast cancer via ITGB1-FAK/ILK signaling axis and its associated downstream network.	/pubmed/26693891	Yang J, Hou Y, Zhou M, Wen S, Zhou J, Xu L, Tang X, Du YE, Hu P, Liu M.	FAK/ILK, MAPK/ERK, PI3K/AKT, and WNT, TGF-β, Twist or ITGB1				microRNA-145 downregulates SIP1-expression but differentially regulates proliferation, migration, invasion and Wnt signaling in SW480 and SW620 cells.	/pubmed/28833449	Sathyanarayanan A, Chandrasekaran KS, Karunagaran D.	SIP1, CTNNB1, TCF4, CCND1, VIM, and SNAI, CDH1			Automated quantitative analysis of epithelial cell scatter.	/pubmed/19271353	Pope MD, Graham NA, Huang BK, Asthagiri AR.	EGF			CXCR6 promotes tumor cell proliferation and metastasis in osteosarcoma through the Akt pathway.	/pubmed/27823764	Ma Y, Xu X, Luo M.	CXCR6, Akt
													TAZ induces growth factor-independent proliferation through activation of EGFR ligand amphiregulin.	/pubmed/22825057	Yang N, Morrison CD, Liu P, Miecznikowski J, Bshara W, Han S, Zhu Q, Omilian AR, Li X, Zhang J.	TAZ, AREG,EGFR		Sulforaphane regulates self-renewal of pancreatic cancer stem cells through the modulation of Sonic hedgehog-GLI pathway.	/pubmed/23129257	Li SH, Fu J, Watkins DN, Srivastava RK, Shankar S.	Smo, Gli 1, and Gli 2, Zeb-1, Bcl-2 and XIAP				Mathematical Modelling of Molecular Pathways Enabling Tumour Cell Invasion and Migration.	/pubmed/26528548	Cohen DP, Martignetti L, Robine S, Barillot E, Zinovyev A, Calzone L.	p53				miR-1301 inhibits hepatocellular carcinoma cell migration, invasion, and angiogenesis by decreasing Wnt/Ô_-catenin signaling through targeting BCL9.	/pubmed/28817119	Yang C, Xu Y, Cheng F, Hu Y, Yang S, Rao J, Wang X.	BCL9, miR-1301			Thyroid hormone receptor beta1 acts as a potent suppressor of tumor invasiveness and metastasis.	/pubmed/19147563	Mart’_nez-Iglesias O, Garcia-Silva S, Tenbaum SP, Regadera J, Larcher F, Paramio JM, Vennstr’_m B, Aranda A.	TRbeta1			miR-199a-5p suppresses human bladder cancer cell metastasis by targeting CCR7.	/pubmed/27814720	Zhou M, Wang S, Hu L, Liu F, Zhang Q, Zhang D.	CCR7, miR-199a-5p
													Yes-associated protein expression in head and neck squamous cell carcinoma nodal metastasis.	/pubmed/22096589	Ge L, Smail M, Meng W, Shyr Y, Ye F, Fan KH, Li X, Zhou HM, Bhowmick NA.	YAP, p63		Intraperitoneal delivery of a small interfering RNA targeting NEDD1 prolongs the survival of scirrhous gastric cancer model mice.	/pubmed/23106787	Fujita T, Yanagihara K, Takeshita F, Aoyagi K, Nishimura T, Takigahira M, Chiwaki F, Fukagawa T, Katai H, Ochiya T, Sakamoto H, Konno H, Yoshida T, Sasaki H.	NEDD1				BTB-Zinc Finger Oncogenes Are Required for Ras and Notch-Driven Tumorigenesis in Drosophila.	/pubmed/26207831	Doggett K, Turkel N, Willoughby LF, Ellul J, Murray MJ, Richardson HE, Brumby AM.	BTB-ZF, JNK				Inhibition of Bevacizumab-induced Epithelial-Mesenchymal Transition by BATF2 Overexpression Involves the Suppression of Wnt/Ô_-Catenin Signaling in Glioblastoma Cells.	/pubmed/28739720	Huang W, Zhang C, Cui M, Niu J, Ding W.	BATF2			Milk fat globule EGF-8 promotes melanoma progression through coordinated Akt and twist signaling in the tumor microenvironment.	/pubmed/18974133	Jinushi M, Nakazaki Y, Carrasco DR, Draganov D, Souders N, Johnson M, Mihm MC, Dranoff G.	MFG-E8, c-Met, IGF1R			Molecular signatures of mu opioid receptor and somatostatin receptor 2 in pancreatic cancer.	/pubmed/27682590	Jorand R, Biswas S, Wakefield DL, Tobin SJ, Golfetto O, Hilton K, Ko M, Ramos JW, Small AR, Chu P, Singh G, Jovanovic-Talisman T.	MOR, SSTR2
													The Hippo transducer TAZ confers cancer stem cell-related traits on breast cancer cells.	/pubmed/22078877	Cordenonsi M, Zanconato F, Azzolin L, Forcato M, Rosato A, Frasson C, Inui M, Montagner M, Parenti AR, Poletti A, Daidone MG, Dupont S, Basso G, Bicciato S, Piccolo S.	TAZ,MST,LATS		Genome-wide screening reveals an EMT molecular network mediated by Sonic hedgehog-Gli1 signaling in pancreatic cancer cells.	/pubmed/22900095	Xu X, Zhou Y, Xie C, Wei SM, Gan H, He S, Wang F, Xu L, Lu J, Dai W, He L, Chen P, Wang X, Guo C.	S100A4				Overexpression of hypoxia-inducible factor 1Ô± induces migration and invasion through Notch signaling.	/pubmed/26094772	Tian Q, Xue Y, Zheng W, Sun R, Ji W, Wang X, An R.	HIF-1α , E-cadherin, CK18 and CK19				miR-378 suppresses the proliferation, migration and invasion of colon cancer cells by inhibiting SDAD1.	/pubmed/28725241	Zeng M, Zhu L, Li L, Kang C.	miR-378, SDAD1			Epithelial to mesenchymal transition (EMT) in human prostate cancer: lessons learned from ARCaP model.	/pubmed/18535913	Zhau HE, Odero-Marah V, Lue HW, Nomura T, Wang R, Chu G, Liu ZR, Zhou BP, Huang WC, Chung LW.	EGF, IGF-1, RANKL , beta2-m			NTS/NTR1 co-expression enhances epithelial-to-mesenchymal transition and promotes tumor metastasis by activating the Wnt/Ô_-catenin signaling pathway in hepatocellular carcinoma.	/pubmed/27611941	Ye Y, Long X, Zhang L, Chen J, Liu P, Li H, Wei F, Yu W, Ren X, Yu J.	NTR1, Wnt1, Wnt3, Wnt5, Axin, and p-GSK3β
																		Transforming growth factor Ô_ signaling regulates the invasiveness of normal mammary epithelial cells and the metastasis formation of tumor cells.	/pubmed/25436679	Vafaizadeh V, Graab U, Darvishi T, Machado R, Groner B.	shSmad4, Stat3, TGFβ, angiopoietin-like-4				DMXL2 drives epithelial to mesenchymal transition in hormonal therapy resistant breast cancer through Notch hyper-activation.	/pubmed/26093085	Faronato M, Nguyen VT, Patten DK, Lombardo Y, Steel JH, Patel N, Woodley L, Shousha S, Pruneri G, Coombes RC, Magnani L.	DMXL2				FOXP3 promotes tumor growth and metastasis by activating Wnt/Ô_-catenin signaling pathway and EMT in non-small cell lung cancer.	/pubmed/28716029	Yang S, Liu Y, Li MY, Ng CSH, Yang SL, Wang S, Zou C, Dong Y, Du J, Long X, Liu LZ, Wan IYP, Mok T, Underwood MJ, Chen GG.	FOXP3, c-Myc and Cyclin D1			Epithelial-to-mesenchymal transition and integrin-linked kinase mediate sensitivity to epidermal growth factor receptor inhibition in human hepatoma cells.	/pubmed/18381447	Fuchs BC, Fujii T, Dorfman JD, Goodwin JM, Zhu AX, Lanuti M, Tanabe KK.	EGFR , AKT			Endothelin-1 promotes epithelial-mesenchymal transition in human chondrosarcoma cells by repressing miR-300.	/pubmed/27602960	Wu MH, Huang PH, Hsieh M, Tsai CH, Chen HT, Tang CH.	ET-1, AMPK, miR-300
																		[Gli1 expression and its relationship with the expression of Shh, Vimentin and E-cadherin in human hepatocellular carcinoma].	/pubmed/22558994	Xu QR, Zheng X, Zan XF, Yao YM, Yang W, Liu QG.	Gli1, Vimentin and E-cadherin				Network biology elucidates metastatic colon cancer mechanisms.	/pubmed/26083805	Kuperstein I, Robine S, Zinovyev A.	NICD, p63, p53, p73				Single-cell RNA sequencing reveals an altered gene expression pattern as a result of CRISPR/cas9-mediated deletion of Gene 33/Mig6 and chronic exposure to hexavalent chromium in human lung epithelial cells.	/pubmed/28688920	Park S, Zhang X, Li C, Yin C, Li J, Fallon JT, Huang W, Xu D.	UCHL1, Gene 33/Mig6			Stromelysin-3 over-expression enhances tumourigenesis in MCF-7 and MDA-MB-231 breast cancer cell lines: involvement of the IGF-1 signalling pathway.	/pubmed/17233884	Kasper G, Reule M, Tschirschmann M, Dankert N, Stout-Weider K, Lauster R, Schrock E, Mennerich D, Duda GN, Lehmann KE.	Stromelysin-3 (ST-3), IGF-1R			Drug-resistant CXCR4-positive cells have the molecular characteristics of EMT in NSCLC.	/pubmed/27581786	Yin H, Wang Y, Chen W, Zhong S, Liu Z, Zhao J.	CXCR4, ITGA5, BMP7, MMP3, VIM, RGS2, ZEB2, TCF3, SNAI2, VCAN, PLEK2, WNT5A, COL3A1, SPARC and FOXC2
																		Genistein inhibits the stemness properties of prostate cancer cells through targeting Hedgehog-Gli1 pathway.	/pubmed/22484470	Zhang L, Li L, Jiao M, Wu D, Wu K, Li X, Zhu G, Yang L, Wang X, Hsieh JT, He D.	CD44				The reciprocal regulation loop of Notch2 pathway and miR-23b in controlling gastric carcinogenesis.	/pubmed/26041881	Huang TT, Ping YH, Wang AM, Ke CC, Fang WL, Huang KH, Lee HC, Chi CW, Yeh TS.	miR-23b, Ets1				Suppression Of Ô_-catenin Nuclear Translocation By CGP57380 Decelerates Poor Progression And Potentiates Radiation-Induced Apoptosis in Nasopharyngeal Carcinoma.	/pubmed/28656063	Wang W, Wen Q, Luo J, Chu S, Chen L, Xu L, Zang H, Alnemah MM, Li J, Zhou J, Fan S.	CGP57380, β-catenin, cyclin D1, c-Myc, and MMP-7									Gli promotes epithelial-mesenchymal transition in human lung adenocarcinomas.	/pubmed/27533453	Li H, Yue D, Jin JQ, Woodard GA, Tolani B, Luh TM, Giroux-Leprieur E, Mo M, Chen Z, Che J, Zhang Z, Zhou Y, Wang L, Hao X, Jablons D, Wang C, He B.	Smo, Gli, E-Cadherin
																		Novel biomarkers and therapeutic targets for optimizing the therapeutic management of melanomas.	/pubmed/22442756	Mimeault M, Batra SK.	SCF, CXCR4, NF-κB, mTOR, MIC-1, EGFR, vimentin, snail and twist				[Advances in molecular mechanisms of tenascin-C in promoting tumor metastasis].	/pubmed/26040014	Nong Y, Bai L, Tang H.	FAK, RhoA, Wnt and Notch, VEGF, syndecan-4, integrin α5β1				MicroRNA-148a suppresses epithelial-mesenchymal transition and invasion of pancreatic cancer cells by targeting Wnt10b and inhibiting the Wnt/Ô_-catenin signaling pathway.	/pubmed/28586066	Peng L, Liu Z, Xiao J, Tu Y, Wan Z, Xiong H, Li Y, Xiao W.	miR-148a, β-catenin, cyclin D1 and MMP-9									CCL21/CCR7 Axis Contributed to CD133+ Pancreatic Cancer Stem-Like Cell Metastasis via EMT and Erk/NF-Ô_B Pathway.	/pubmed/27505247	Zhang L, Wang D, Li Y, Liu Y, Xie X, Wu Y, Zhou Y, Ren J, Zhang J, Zhu H, Su Z.	CCL21/CCR7, E-cadherin, N- cadherin, LYVE-1
																		Cancer Stem Cells, EMT, and Developmental Pathway Activation in Pancreatic Tumors.	/pubmed/24213498	Hindriksen S, Bijlsma MF.	Nodal/Activin				All-trans-retinoic Acid Modulates the Plasticity and Inhibits the Motility of Breast Cancer Cells: ROLE OF NOTCH1 AND TRANSFORMING GROWTH FACTOR (TGFÔ_).	/pubmed/26018078	Zanetti A, Affatato R, Centritto F, Fratelli M, Kurosaki M, Barzago MM, Bolis M, Terao M, Garattini E, Paroni G.	ERBB2 and RARA , EGF and heregulin-β1				DDAH1 mediates gastric cancer cell invasion and metastasis via Wnt/Ô_-catenin signaling pathway.	/pubmed/28580735	Ye J, Xu J, Li Y, Huang Q, Huang J, Wang J, Zhong W, Lin X, Chen W, Lin X.	DDAH1, Wnt/GSK-3β									The bile acid receptor GPBAR1 (TGR5) is expressed in human gastric cancers and promotes epithelial-mesenchymal transition in gastric cancer cell lines.	/pubmed/27409173	Carino A, Graziosi L, D'Amore C, Cipriani S, Marchian’_ S, Marino E, Zampella A, Rende M, Mosci P, Distrutti E, Donini A, Fiorucci S.	GPBAR1, CD44 and FAT1
																		GLI1 inhibition promotes epithelial-to-mesenchymal transition in pancreatic cancer cells.	/pubmed/22086851	Joost S, Almada LL, Rohnalter V, Holz PS, Vrabel AM, Fernandez-Barrena MG, McWilliams RR, Krause M, Fernandez-Zapico ME, Lauth M.	SNAIL, SLUG, GLI1, E-cadherin, TGFβ				Nobiletin inhibited hypoxia-induced epithelial-mesenchymal transition of lung cancer cells by inactivating of Notch-1 signaling and switching on miR-200b.	/pubmed/26012256	Gao XJ, Liu JW, Zhang QG, Zhang JJ, Xu HT, Liu HJ.	Twist1, Snail1, and ZEB1/2				Downregulated connexin32 promotes EMT through the Wnt/Ô_-catenin pathway by targeting Snail expression in hepatocellular carcinoma.	/pubmed/28498415	Yang Y, Zhang N, Zhu J, Hong XT, Liu H, Ou YR, Su F, Wang R, Li YM, Wu Q.	Cx32, Wnt/β-catenin									Promotion of epithelial-mesenchymal transition by Frizzled2 is involved in the metastasis of endometrial cancer.	/pubmed/27373314	Bian Y, Chang X, Liao Y, Wang J, Li Y, Wang K, Wan X.	Fzd2
																		Sonic hedgehog pathway promotes metastasis and lymphangiogenesis via activation of Akt, EMT, and MMP-9 pathway in gastric cancer.	/pubmed/21975935	Yoo YA, Kang MH, Lee HJ, Kim BH, Park JK, Kim HK, Kim JS, Oh SC.	PI3K/Akt, MMP-9				Tangeretin enhances radiosensitivity and inhibits the radiation-induced epithelial-mesenchymal transition of gastric cancer cells.	/pubmed/25998143	Zhang X, Zheng L, Sun Y, Wang T, Wang B.	Notch-1, Jagged1/2, Hey-1 and Hes-1				Ectopic repression of receptor tyrosine kinase-like orphan receptor 2 inhibits malignant transformation of ovarian cancer cells by reversing epithelial-mesenchymal transition.	/pubmed/28475014	Xu Y, Ma YH, Pang YX, Zhao Z, Lu JJ, Mao HL, Liu PS.	WNT5A , Receptor tyrosine kinase-like orphan receptor 2									Evidence for a role of GPRC6A in prostate cancer metastasis based on case-control and in vitro analyses.	/pubmed/27338047	Liu M, Zhao YY, Yang F, Wang JY, Shi XH, Zhu XQ, Xu Y, Wei D, Sun L, Zhang YG, Yang K, Qu YC, Wang X, Liang SY, Chen X, Zhao CX, Zhu L, Tang L, Zheng CG, Yang Z.	MMP2 and MMP9, RUNX2, ERK
																		Inhibition of sonic hedgehog pathway and pluripotency maintaining factors regulate human pancreatic cancer stem cell characteristics.	/pubmed/21796625	Tang SN, Fu J, Nall D, Rodova M, Shankar S, Srivastava RK.	Nanog, c-Myc and Oct-4, EGCG, Bcl-2 and XIAP and activating caspase-3, Snail, Slug and ZEB1, and TCF/LEF				Quantitative proteomic analysis reveals that anti-cancer effects of selenium-binding protein 1 in vivo are associated with metabolic pathways.	/pubmed/25974208	Ying Q, Ansong E, Diamond AM, Lu Z, Yang W, Bie X.	SBP1				Dickkopf-related protein 2 induces G0/G1 arrest and apoptosis through suppressing Wnt/Ô_-catenin signaling and is frequently methylated in breast cancer.	/pubmed/28467796	Mu J, Hui T, Shao B, Li L, Du Z, Lu L, Ye L, Li S, Li Q, Xiao Q, Qiu Z, Zhang Y, Fan J, Ren G, Tao Q, Xiang T.	DKK2, Wnt/β-catenin									COX-2 Induces Breast Cancer Stem Cells via EP4/PI3K/AKT/NOTCH/WNT Axis.	/pubmed/27301070	Majumder M, Xin X, Liu L, Tutunea-Fatan E, Rodriguez-Torres M, Vincent K, Postovit LM, Hess D, Lala PK.	COX-2, ALDH1A, CD44, β-Catenin, NANOG, OCT3/4, SOX-2
																		Evaluation of glioma-associated oncogene 1 expression and its correlation with the expression of sonic hedgehog, E-cadherin and S100a4 in human hepatocellular carcinoma.	/pubmed/21472341	Zheng X, Yao Y, Xu Q, Tu K, Liu Q.	Shh, E-cadherin and S100a4, Gli1				c-Jun N-terminal kinase 2 prevents luminal cell commitment in normal mammary glands and tumors by inhibiting p53/Notch1 and breast cancer gene 1 expression.	/pubmed/25970777	Cantrell MA, Ebelt ND, Pfefferle AD, Perou CM, Van Den Berg CL.	JNK2, p53				TIAM1 Antagonizes TAZ/YAP Both in the Destruction Complex in the Cytoplasm and in the Nucleus to Inhibit Invasion of Intestinal Epithelial Cells.	/pubmed/28416184	Diamantopoulou Z, White G, Fadlullah MZH, Dreger M, Pickering K, Maltas J, Ashton G, MacLeod R, Baillie GS, Kouskoff V, Lacaud G, Murray GI, Sansom OJ, Hurlstone AFL, Malliri A.	TAZ and YAP									Crosstalk between CCL7 and CCR3 promotes metastasis of colon cancer cells via ERK-JNK signaling pathways.	/pubmed/27167205	Lee YS, Kim SY, Song SJ, Hong HK, Lee Y, Oh BY, Lee WY, Cho YB.	CCL7-CCR3-ERK-JNK
																		Up-regulation of sonic hedgehog contributes to TGF-Ô_1-induced epithelial to mesenchymal transition in NSCLC cells.	/pubmed/21249152	Maitah MY, Ali S, Ahmad A, Gadgeel S, Sarkar FH.	ZEB1, TGF-β1, Fibronectin				Notch-1 promotes stemness and epithelial to mesenchymal transition in colorectal cancer.	/pubmed/25914224	Fender AW, Nutter JM, Fitzgerald TL, Bertrand FE, Sigounas G.	ICN1, CD44, Slug, and Smad-3				Dickkopf-Related Protein 2 is Epigenetically Inactivated and Suppresses Colorectal Cancer Growth and Tumor Metastasis by Antagonizing Wnt/Ô_-Catenin Signaling.	/pubmed/28365691	Wang C, Yue Y, Shao B, Qiu Z, Mu J, Tang J, Han X, Xiang T, Ren G.	DKK2									CCR6 expression in colon cancer is associated with advanced disease and supports epithelial-to-mesenchymal transition.	/pubmed/27149649	Kapur N, Mir H, Clark Iii CE, Krishnamurti U, Beech DJ, Lillard JW, Singh S.	CCR6, α-SMA, SNAILl and ZEB1, CCL20
																		Differential expression of hedgehog signaling components and Snail/E-cadherin in human brain tumors.	/pubmed/20878114	Chou CH, Lieu AS, Wu CH, Chang LK, Loh JK, Lin RC, Chen WJ, Liao HD, Fu WS, Chang CS, Lin CC, Hsu CM, Chio CC, Howng SL, Hong YR.	Smo (35/69), Ptch (50/69), Gli1 (56/69), Gli2 (29/69) and N-myc (39/69), Snail/E-cadherin				Notch signaling induces epithelial-mesenchymal transition to promote invasion and metastasis in adenoid cystic carcinoma.	/pubmed/25755838	Zhao ZL, Ma SR, Wang WM, Huang CF, Yu GT, Wu TF, Bu LL, Wang YF, Zhao YF, Zhang WF, Sun ZJ.	DAPT				Clinical implication of Frizzled 2 expression and its association with epithelial-to-mesenchymal transition in hepatocellular carcinoma.	/pubmed/28350091	Asano T, Yamada S, Fuchs BC, Takami H, Hayashi M, Sugimoto H, Fujii T, Tanabe KK, Kodera Y.	Fzd2									Invasion and increased expression of S100A4 and CYR61 in mesenchymal transformed breast cancer cells is downregulated by GnRH.	/pubmed/27098123	Gr’_ndker C, Bauerschmitz G, Schubert A, Emons G.	S100A4 and CYR61
																		Leptin promotes the myofibroblastic phenotype in hepatic stellate cells by activating the hedgehog pathway.	/pubmed/20843817	Choi SS, Syn WK, Karaca GF, Omenetti A, Moylan CA, Witek RP, Agboola KM, Jung Y, Michelotti GA, Diehl AM.	PI3K/Akt, JAK/STAT, and Hh,				Acquisition of resistance to trastuzumab in gastric cancer cells is associated with activation of IL-6/STAT3/Jagged-1/Notch positive feedback loop.	/pubmed/25669984	Yang Z, Guo L, Liu D, Sun L, Chen H, Deng Q, Liu Y, Yu M, Ma Y, Guo N, Shi M.	IL-6/STAT3/Jagged-1/Notch				Knockdown of Homeobox B5 (HOXB5) Inhibits Cell Proliferation, Migration, and Invasion in Non-Small Cell Lung Cancer Cells Through Inactivation of the Wnt/Ô_-Catenin Pathway.	/pubmed/28337958	Zhang B, Li N, Zhang H.	HOXB5									Curcumin inhibits hypoxia-induced epithelialŠ—•mesenchymal transition in pancreatic cancer cells via suppression of the hedgehog signaling pathway.	/pubmed/27035865	Cao L, Xiao X, Lei J, Duan W, Ma Q, Li W.	SHH, SMO and GLI1
																		Human colon cancer epithelial cells harbour active HEDGEHOG-GLI signalling that is essential for tumour growth, recurrence, metastasis and stem cell survival and expansion.	/pubmed/20049737	Varnat F, Duquet A, Malerba M, Zbinden M, Mas C, Gervaz P, Ruiz i Altaba A.	(beta CAT)/TCF				Notch1 signaling regulates the epithelial-mesenchymal transition and invasion of breast cancer in a Slug-dependent manner.	/pubmed/25645291	Shao S, Zhao X, Zhang X, Luo M, Zuo X, Huang S, Wang Y, Gu S, Zhao X.	N1ICD				GOLPH3 induces epithelial-mesenchymal transition via Wnt/Ô_-catenin signaling pathway in epithelial ovarian cancer.	/pubmed/28332316	Sun J, Yang X, Zhang R, Liu S, Gan X, Xi X, Zhang Z, Feng Y, Sun Y.	GOLPH3, Wnt/β-catenin pathway, XAV939 and LiCl									Embelin Inhibits Invasion and Migration of MDA-MB-231 Breast Cancer Cells by Suppression of CXC Chemokine Receptor 4, Matrix Metalloproteinases-9/2, and Epithelial-Mesenchymal Transition.	/pubmed/27030214	Lee H, Ko JH, Baek SH, Nam D, Lee SG, Lee J, Yang WM, Um JY, Kim SH, Shim BS, Ahn KS.	CXCR4, NF-κB, MMP-9/2
																		Integrative genomic analyses of ZEB2: Transcriptional regulation of ZEB2 based on SMADs, ETS1, HIF1alpha, POU/OCT, and NF-kappaB.	/pubmed/19424592	Katoh M, Katoh M.	ZEB2, POU3F2 (BRN2) and POU3F3 (BRN1), CDH1, CLDN4, CCND1, TERT, SFRP1, ALPL and miR-200b-200a-429, SNAI1/Snail, SNAI2/Slug, ZEB1/deltaEF1/ZFHX1A, ZEB2/SIP1/ZFHX1B, TWIST1/TWIST, and TWIST2/DERMO1				HES1 promotes metastasis and predicts poor survival in patients with colorectal cancer.	/pubmed/25636905	Yuan R, Ke J, Sun L, He Z, Zou Y, He X, Chen Y, Wu X, Cai Z, Wang L, Wang J, Fan X, Wu X, Lan P.	HES1, Twist-1				Sphingosylphosphorylcholine Induces Thrombospondin-1 Secretion in MCF10A Cells via ERK2.	/pubmed/28274095	Kang JH, Kim HJ, Park MK, Lee CH.	TSP-1, ERK2, N-cadherin and vimentin, E-cad, MMP-3									CCL25/CCR9 Signal Promotes Migration and Invasion in Hepatocellular and Breast Cancer Cell Lines.	/pubmed/27008282	Zhang Z, Sun T, Chen Y, Gong S, Sun X, Zou F, Peng R.	CCL25/CCR9
																		Characterization and functional analysis of a slow cycling stem cell-like subpopulation in pancreas adenocarcinoma.	/pubmed/19421880	Dembinski JL, Krauss S.	CD24, CD133, CD44				Wnt3a increases the metastatic potential of non-small cell lung cancer cells in vitro in part via its upregulation of Notch3.	/pubmed/25572698	Li C, Song G, Zhang S, Wang E, Cui Z.	HES1 and HEYL, Wnt3a and Notch3				MALAT1 promoted invasiveness of gastric adenocarcinoma.	/pubmed/28077118	Lee NK, Lee JH, Ivan C, Ling H, Zhang X, Park CH, Calin GA, Lee SK.	MALAT1									Geminin overexpression-dependent recruitment and crosstalk with mesenchymal stem cells enhance aggressiveness in triple negative breast cancers.	/pubmed/26989079	Ananthula S, Sinha A, El Gassim M, Batth S, Marshall GD Jr, Gardner LH, Shimizu Y, ElShamy WM.	RAGE, NF-κB , RAGE
																		Invasive prostate cancer cells are tumor initiating cells that have a stem cell-like genomic signature.	/pubmed/19221883	Klarmann GJ, Hurt EM, Mathews LA, Zhang X, Duhagon MA, Mistree T, Thomas SB, Farrar WL.	CD44				Notch1 controls cell invasion and metastasis in small cell lung carcinoma cell lines.	/pubmed/25456735	Hassan WA, Yoshida R, Kudoh S, Hasegawa K, Niimori-Kita K, Ito T.	Notch1				Capn4 promotes epithelial-mesenchymal transition in human melanoma cells through activation of the Wnt/Ô_-catenin pathway.	/pubmed/27878263	Wang E, Wang D, Li B, Ma H, Wang C, Guan L, Zhang H, Yi L, Li S.	CAPNS1, β-catenin, vimentin, E-cadherin and N-cadherinv									Curcumin inhibits tumor epithelialŠ—•mesenchymal transition by downregulating the Wnt signaling pathway and upregulating NKD2 expression in colon cancer cells.	/pubmed/26985708	Zhang Z, Chen H, Xu C, Song L, Huang L, Lai Y, Wang Y, Chen H, Gu D, Ren L, Yao Q.	CXCR4 , NKD2
																		Snail and Sonic Hedgehog activation in neuroendocrine tumors of the ileum.	/pubmed/17914115	Fendrich V, Waldmann J, Esni F, Ramaswamy A, Mullendore M, Buchholz M, Maitra A, Feldmann G.	Snail, E-cadherin				Concomitant Notch activation and p53 deletion trigger epithelial-to-mesenchymal transition and metastasis in mouse gut.	/pubmed/25295490	Chanrion M, Kuperstein I, Barri’åre C, El Marjou F, Cohen D, Vignjevic D, Stimmer L, Paul-Gilloteaux P, Bi’åche I, Tavares Sdos R, Boccia GF, Cacheux W, Meseure D, Fre S, Martignetti L, Legoix-N’© P, Girard E, Fetler L, Barillot E, Louvard D, Zinovyev A, Robine S.	p53				Plasma glutamate carboxypeptidase is a negative regulator in liver cancer metastasis.	/pubmed/27806330	Lee JH, Cho HS, Lee JJ, Jun SY, Ahn JH, Min JS, Yoon JY, Choi MH, Jeon SJ, Lim JH, Jung CR, Kim DS, Kim HT, Factor VM, Lee YH, Thorgeirsson SS, Kim CH, Kim NS.	DKK4, Wnt/β-catenin									Gastrin-releasing peptide receptor (GRPr) promotes EMT, growth, and invasion in canine prostate cancer.	/pubmed/26939805	Elshafae SM, Hassan BB, Supsavhad W, Dirksen WP, Camiener RY, Ding H, Tweedle MF, Rosol TJ.	GRPr
																		Blockade of hedgehog signaling inhibits pancreatic cancer invasion and metastases: a new paradigm for combination therapy in solid cancers.	/pubmed/17332349	Feldmann G, Dhara S, Fendrich V, Bedja D, Beaty R, Mullendore M, Karikari C, Alvarez H, Iacobuzio-Donahue C, Jimeno A, Gabrielson KL, Matsui W, Maitra A.	ALDH, E-cadherin				Enteric pathogens and cellular transformation: bridging the gaps.	/pubmed/25216513	Umar S.	Slug, Snail, Twist, Zeb1 and 2, E-cadherin				Glypican-5 suppresses Epithelial-Mesenchymal Transition of the lung adenocarcinoma by competitively binding to Wnt3a.	/pubmed/27806326	Wang S, Qiu M, Xia W, Xu Y, Mao Q, Wang J, Dong G, Xu L, Yang X, Yin R.	Wnt3a , GPC5									MACC1 mediates acetylcholine-induced invasion and migration by human gastric cancer cells.	/pubmed/26919111	Yang T, He W, Cui F, Xia J, Zhou R, Wu Z, Zhao Y, Shi M.	MACC1, M3R, AMPK
																		Wnt, hedgehog and snail: sister pathways that control by GSK-3beta and beta-Trcp in the regulation of metastasis.	/pubmed/15917668	Zhou BP, Hung MC.	E-cadherin, Snail, zinc finger transcription factor, GSK-3beta and beta-Trcp				Deregulation of Bmi-1 is associated with enhanced migration, invasion and poor prognosis in salivary adenoid cystic carcinoma.	/pubmed/25151043	Chang B, Li S, He Q, Liu Z, Zhao L, Zhao T, Wang A.	ABCG2, Notch, ALDH-1, Oct-4, Nanog and Epcam, Bmi-1				Knockdown of FRAT1 inhibits hypoxia-induced epithelial-to-mesenchymal transition via suppression of the Wnt/Ô_-catenin pathway in hepatocellular carcinoma cells.	/pubmed/27666874	Fan WH, Du FJ, Liu XJ, Chen N.	FRAT1, β-catenin, cyclin D1 and c-myc									Inhibition of Growth and Metastasis of Colon Cancer by Delivering 5-Fluorouracil-loaded Pluronic P85 Copolymer Micelles.	/pubmed/26864651	Zhu P, Zhao N, Sheng D, Hou J, Hao C, Yang X, Zhu B, Zhang S, Han Z, Wei L, Zhang L.	5-Fu, P85
																									Twist1 induces endothelial differentiation of tumour cells through the Jagged1-KLF4 axis.	/pubmed/25146389	Chen HF, Huang CH, Liu CJ, Hung JJ, Hsu CC, Teng SC, Wu KJ.	Twist1-Jagged1/KLF4				CAPE suppresses migration and invasion of prostate cancer cells via activation of non-canonical Wnt signaling.	/pubmed/27191743	Tseng JC, Lin CY, Su LC, Fu HH, Yang SD, Chuu CP.	MMP-9 and MMP-2, ROR2, Ki67, Frizzle 4, NF-κB p65, MMP-9, Snail, β-catenin,IκBα									Delivery of miR-200c Mimic with Poly(amido amine) CXCR4 Antagonists for Combined Inhibition of Cholangiocarcinoma Cell Invasiveness.	/pubmed/26855082	Xie Y, Wehrkamp CJ, Li J, Wang Y, Wang Y, Mott JL, Oupick’_ D.	CXCR4, miR-200c
																									Mesenchymal change and drug resistance in neuroblastoma.	/pubmed/25128389	Naiditch JA, Jie C, Lautz TB, Yu S, Clark S, Voronov D, Chu F, Madonna MB.	RhoA, PI3K, and ILK, Smads				ZNRF3 Inhibits the Invasion and Tumorigenesis in Nasopharyngeal Carcinoma Cells by Inactivating the Wnt/Ô_-Catenin Pathway.	/pubmed/27733215	Wang Z, Wang Y, Ren H, Jin Y, Guo Y.	ZNRF3, β-catenin, cyclin D1, and c-Myc									Lysophosphatidic acid activates Arf6 to promote the mesenchymal malignancy of renal cancer.	/pubmed/26854204	Hashimoto S, Mikami S, Sugino H, Yoshikawa A, Hashimoto A, Onodera Y, Furukawa S, Handa H, Oikawa T, Okada Y, Oya M, Sabe H.	Arf6, AMAP1, EPB41L5
																									Notch3 is important for TGF-Ô_-induced epithelial-mesenchymal transition in non-small cell lung cancer bone metastasis by regulating ZEB-1.	/pubmed/25080992	Liu L, Chen X, Wang Y, Qu Z, Lu Q, Zhao J, Yan X, Zhang H, Zhou Y.	pTHrP and IL-6, ZEB1				Role of BCL9L in transforming growth factor-Ô_ (TGF-Ô_)-induced epithelial-to-mesenchymal-transition (EMT) and metastasis of pancreatic cancer.	/pubmed/27713160	Sannino G, Armbruster N, Bodenh’_fer M, Haerle U, Behrens D, Buchholz M, Rothbauer U, Sipos B, Schmees C.	BCL9L, TGF-β									Activation of GPER suppresses epithelial mesenchymal transition of triple negative breast cancer cells via NF-Ô_B signals.	/pubmed/26842883	Chen ZJ, Wei W, Jiang GM, Liu H, Wei WD, Yang X, Wu YM, Liu H, Wong CK, Du J, Wang HS.	GPER, GSK-3β, PI3K/Akt, ERK1/2
																									Rottlerin suppresses growth of human pancreatic tumors in nude mice, and pancreatic cancer cells isolated from Kras(G12D) mice.	/pubmed/25050737	Huang M, Tang SN, Upadhyay G, Marsh JL, Jackman CP, Srivastava RK, Shankar S.	Bcl-2, cyclin D1, CDK2 and CDK6, Cox-2, VEGF, VEGFR, and IL-8, MMP-2 and MMP-9				FERMT1 mediates epithelial-mesenchymal transition to promote colon cancer metastasis via modulation of Ô_-catenin transcriptional activity.	/pubmed/27641329	Liu CC, Cai DL, Sun F, Wu ZH, Yue B, Zhao SL, Wu XS, Zhang M, Zhu XW, Peng ZH, Yan DW.	FERMT1									Induction of CXCR2 ligands, stem cell-like phenotype, and metastasis in chemotherapy-resistant breast cancer cells.	/pubmed/26797460	Sharma B, Varney ML, Saxena S, Wu L, Singh RK.	CXCR2
																									Gastric cancer cell growth and epithelial-mesenchymal transition are inhibited by Ô_-secretase inhibitor DAPT.	/pubmed/24932308	Li LC, Peng Y, Liu YM, Wang LL, Wu XL.	Notch1, Snail				Tumour cell-derived WNT5B modulates in vitro lymphangiogenesis via induction of partial endothelial-mesenchymal transition of lymphatic endothelial cells.	/pubmed/27593938	Wang SH, Chang JS, Hsiao JR, Yen YC, Jiang SS, Liu SH, Chen YL, Shen YY, Chang JY, Chen YW.	WNT5B, SNAIL, SLUG									LPS-induced CXCR4-dependent migratory properties and a mesenchymal-like phenotype of colorectal cancer cells.	/pubmed/26745593	Liu WT, Jing YY, Yan F, Han ZP, Lai FB, Zeng JX, Yu GF, Fan QM, Li R, Zhao QD, Wu MC, Wei LX.	CXCL12, NF-κB ,SDF-1α
																									Zebrafish reporter lines reveal in vivo signaling pathway activities involved in pancreatic cancer.	/pubmed/24878567	Schiavone M, Rampazzo E, Casari A, Battilana G, Persano L, Moro E, Liu S, Leach SD, Tiso N, Argenton F.	KRAS, TGFβ, MDB				Glypican-3 induces a mesenchymal to epithelial transition in human breast cancer cells.	/pubmed/27507057	Castillo LF, Tasc’_n R, Lago Huvelle MR, Novack G, Llorens MC, Dos Santos AF, Shortrede J, Cabanillas AM, Bal de Kier Joff’© E, Labriola L, Peters MG.	Glypican-3 (GPC3), ZEB1, E-cadherin									Moderate swimming suppressed the growth and metastasis of the transplanted liver cancer in mice model: with reference to nervous system.	/pubmed/26686088	Zhang QB, Zhang BH, Zhang KZ, Meng XT, Jia QA, Zhang QB, Bu Y, Zhu XD, Ma DN, Ye BG, Zhang N, Ren ZG, Sun HC, Tang ZY.	TGF-β1, DR2
																									Human colorectal CD24+ cancer stem cells are susceptible to epithelial-mesenchymal transition.	/pubmed/24858473	Okano M, Konno M, Kano Y, Kim H, Kawamoto K, Ohkuma M, Haraguchi N, Yokobori T, Mimori K, Yamamoto H, Sekimoto M, Doki Y, Mori M, Ishii H.	CD24				B-cell translocation gene 3 overexpression inhibits proliferation and invasion of colorectal cancer SW480 cells via Wnt/Ô_-catenin signaling pathway.	/pubmed/27468874	Mao D, Qiao L, Lu H, Feng Y.	p27, BTG3, Cyclin D1 and Cyclin E1									A novel antagonist of CXCR4 prevents bone marrow-derived mesenchymal stem cell-mediated osteosarcoma and hepatocellular carcinoma cell migration and invasion.	/pubmed/26517945	Fontanella R, Pelagalli A, Nardelli A, D'Alterio C, Ieran’_ C, Cerchia L, Lucarelli E, Scala S, Zannetti A.	Peptide R, CXCR4
																									The complex interplay between ERK1/2, TGFÔ_/Smad, and Jagged/Notch signaling pathways in the regulation of epithelial-mesenchymal transition in retinal pigment epithelium cells.	/pubmed/24788939	Chen X, Xiao W, Wang W, Luo L, Ye S, Liu Y.	ERK1/2, TGFβ2/Smad2/3 , MEK				Oridonin inhibits pancreatic cancer cell migration and epithelial-mesenchymal transition by suppressing Wnt/Ô_-catenin signaling pathway.	/pubmed/27453691	Liu QQ, Chen K, Ye Q, Jiang XH, Sun YW.	Oridonin (ORI), GSK3β									Altered purinergic receptor-CaÎ_Š_ signaling associated with hypoxia-induced epithelial-mesenchymal transition in breast cancer cells.	/pubmed/26433470	Azimi I, Beilby H, Davis FM, Marcial DL, Kenny PA, Thompson EW, Roberts-Thomson SJ, Monteith GR.	P2X4, P2X5, P2X7, P2Y1 and P2Y11 mRNA
																									ERK1/2 pathway mediates epithelial-mesenchymal transition by cross-interacting with TGFÔ_/Smad and Jagged/Notch signaling pathways in lens epithelial cells.	/pubmed/24714800	Chen X, Ye S, Xiao W, Wang W, Luo L, Liu Y.	TGFβ2/Smad2/3				MHP-1 inhibits cancer metastasis and restores topotecan sensitivity via regulating epithelial-mesenchymal transition and TGF-Ô_ signaling in human breast cancer cells.	/pubmed/27444351	Lin S, Lyu X, Yu J, Sun L, Du D, Lai Y, Li H, Wang Y, Zhang L, Yin H, Yuan S.	MHP-1									PAR1 participates in the ability of multidrug resistance and tumorigenesis by controlling Hippo-YAP pathway.	/pubmed/26431277	Fujimoto D, Ueda Y, Hirono Y, Goi T, Yamaguchi A.	PAR1, Hippo-YAP, TAZ
																									Epithelial-mesenchymal transition - activating transcription factors - multifunctional regulators in cancer.	/pubmed/24179606	Garg M.	Wnt, Notch, hedgehog				YPEL3 suppresses epithelial-mesenchymal transition and metastasis of nasopharyngeal carcinoma cells through the Wnt/Ô_-catenin signaling pathway.	/pubmed/27400785	Zhang J, Wen X, Ren XY, Li YQ, Tang XR, Wang YQ, He QM, Yang XJ, Sun Y, Liu N, Ma J.	Yippee-like 3 (YPEL3)									Feed-Forward Reciprocal Activation of PAFR and STAT3 Regulates Epithelial-Mesenchymal Transition in Non-Small Cell Lung Cancer.	/pubmed/26359459	Chen J, Lan T, Zhang W, Dong L, Kang N, Zhang S, Fu M, Liu B, Liu K, Zhan Q.	PAFR, STAT3, JAK2
																									Silencing NOTCH signaling causes growth arrest in both breast cancer stem cells and breast cancer cells.	/pubmed/24129237	Suman S, Das TP, Damodaran C.	β-catenin and vimentin, ALDH				Promotion of epithelial-mesenchymal transition by Frizzled2 is involved in the metastasis of endometrial cancer.	/pubmed/27373314	Bian Y, Chang X, Liao Y, Wang J, Li Y, Wang K, Wan X.	Fzd2									Aspirin and P2Y12 inhibition attenuate platelet-induced ovarian cancer cell invasion.	/pubmed/26353776	Cooke NM, Spillane CD, Sheils O, O'Leary J, Kenny D.	P2Y12
																									Notch-1-mediated esophageal carcinoma EC-9706 cell invasion and metastasis by inducing epithelial-mesenchymal transition through Snail.	/pubmed/24022665	Wang T, Xuan X, Pian L, Gao P, Hu H, Zheng Y, Zang W, Zhao G.	Snail, Notch-1				MALAT1 induces tongue cancer cells' EMT and inhibits apoptosis through Wnt/Ô_-catenin signaling pathway.	/pubmed/27353727	Liang J, Liang L, Ouyang K, Li Z, Yi X.	LncRNA MALAT1 , Wnt/β-catenin									Nef-M1, a peptide antagonist of CXCR4, inhibits tumor angiogenesis and epithelialŠ—•toŠ—•mesenchymal transition in colon and breast cancers.	/pubmed/26318034	Katkoori VR, Basson MD, Bond VC, Manne U, Bumpers HL.	CXCR4 , Nef-M1
																									HMGA1 promotes metastatic processes in basal-like breast cancer regulating EMT and stemness.	/pubmed/23945276	Pegoraro S, Ros G, Piazza S, Sommaggio R, Ciani Y, Rosato A, Sgarra R, Del Sal G, Manfioletti G.	HMGA1				Inhibition of SALL4 reduces tumorigenicity involving epithelial-mesenchymal transition via Wnt/Ô_-catenin pathway in esophageal squamous cell carcinoma.	/pubmed/27329034	He J, Zhou M, Chen X, Yue D, Yang L, Qin G, Zhang Z, Gao Q, Wang D, Zhang C, Huang L, Wang L, Zhang B, Yu J, Zhang Y.	SALL4									CCR7 regulates Twist to induce the epithelial-mesenchymal transition in pancreatic ductal adenocarcinoma.	/pubmed/26219899	Li K, Xu B, Xu G, Liu R.	CCR7, PI3K/AKT , p-ERK, p-AKT, Twist, N-cadherin, MMP9, and α-SMA
																									Notch activation stimulates migration of breast cancer cells and promotes tumor growth.	/pubmed/23826634	Bol’_s V, Mira E, Mart’_nez-Poveda B, Lux’n G, Ca’±amero M, Mart’_nez-A C, Ma’±es S, de la Pompa JL.	N1ICD, E-cad, Hes1 and Hey1				COX-2 Induces Breast Cancer Stem Cells via EP4/PI3K/AKT/NOTCH/WNT Axis.	/pubmed/27301070	Majumder M, Xin X, Liu L, Tutunea-Fatan E, Rodriguez-Torres M, Vincent K, Postovit LM, Hess D, Lala PK.	ALDH1A, CD44, β-Catenin, NANOG, OCT3/4, SOX-2, COX-2									CXCR7 mediates TGFÔ_1-promoted EMT and tumor-initiating features in lung cancer.	/pubmed/26212008	Wu YC, Tang SJ, Sun GH, Sun KH.	CXCR7, TGFβ1, CD44
																									A link between premenopausal iron deficiency and breast cancer malignancy.	/pubmed/23800380	Jian J, Yang Q, Shao Y, Axelrod D, Smith J, Singh B, Krauter S, Chiriboga L, Yang Z, Li J, Huang X.	Snai1, E-cadherin				Migration and invasion is inhibited by silencing ROR1 and ROR2 in chemoresistant ovarian cancer.	/pubmed/27239958	Henry CE, Llamosas E, Djordjevic A, Hacker NF, Ford CE.	ROR1 and ROR2									CXCR4 Regulates Extra-Medullary Myeloma through Epithelial-Mesenchymal-Transition-like Transcriptional Activation.	/pubmed/26190113	Roccaro AM, Mishima Y, Sacco A, Moschetta M, Tai YT, Shi J, Zhang Y, Reagan MR, Huynh D, Kawano Y, Sahin I, Chiarini M, Manier S, Cea M, Aljawai Y, Glavey S, Morgan E, Pan C, Michor F, Cardarelli P, Kuhne M, Ghobrial IM.	CXCR4
																									Inflammatory breast cancer (IBC): clues for targeted therapies.	/pubmed/23784380	Fernandez SV, Robertson FM, Pei J, Aburto-Chumpitaz L, Mu Z, Chu K, Alpaugh RK, Huang Y, Cao Y, Ye Z, Cai KQ, Boley KM, Klein-Szanto AJ, Devarajan K, Addya S, Cristofanilli M.	FAK1, MYC, ATAD2, CD44, NOTCH3, ALK				Baicalein suppresses metastasis of breast cancer cells by inhibiting EMT via downregulation of SATB1 and Wnt/Ô_-catenin pathway.	/pubmed/27143851	Ma X, Yan W, Dai Z, Gao X, Ma Y, Xu Q, Jiang J, Zhang S.	SATB1, vimentin, SNAIL									P2Y2 Receptor and EGFR Cooperate to Promote Prostate Cancer Cell Invasion via ERK1/2 Pathway.	/pubmed/26182292	Li WH, Qiu Y, Zhang HQ, Tian XX, Fang WG.	P2Y2, IL-8 , EGFR and ERK1/2
																									Utility of a bacterial infection model to study epithelial-mesenchymal transition, mesenchymal-epithelial transition or tumorigenesis.	/pubmed/23752178	Chandrakesan P, Roy B, Jakkula LU, Ahmed I, Ramamoorthy P, Tawfik O, Papineni R, Houchen C, Anant S, Umar S.	vimentin, fibronectin and DCLK1,				TRIM29 overexpression is associated with poor prognosis and promotes tumor progression by activating Wnt/Ô_-catenin pathway in cervical cancer.	/pubmed/27081037	Xu R, Hu J, Zhang T, Jiang C, Wang HY.	TRIM29, β-Catenin and C-myc, GSK-3β									CCR7 enhances TGF-Ô_1-induced epithelial-mesenchymal transition and is associated with lymph node metastasis and poor overall survival in gastric cancer.	/pubmed/26176983	Ma H, Gao L, Li S, Qin J, Chen L, Liu X, Xu P, Wang F, Xiao H, Zhou S, Gao Q, Liu B, Sun Y, Liang C.	CCR7, NF-κB-p65, TGF-β1
																									Bone marrow-derived CD11b+Jagged2+ cells promote epithelial-to-mesenchymal transition and metastasization in colorectal cancer.	/pubmed/23722542	Caiado F, Carvalho T, Rosa I, Rem’©dio L, Costa A, Matos J, Heissig B, Yagita H, Hattori K, da Silva JP, Fidalgo P, Pereira AD, Dias S.	Jagged2				TUSC3 promotes colorectal cancer progression and epithelial-mesenchymal transition (EMT) through WNT/Ô_-catenin and MAPK signalling.	/pubmed/27071482	Gu Y, Wang Q, Guo K, Qin W, Liao W, Wang S, Ding Y, Lin J.	TUSC3									Lysophosphatidic Acid Initiates Epithelial to Mesenchymal Transition and Induces Ô_-Catenin-mediated Transcription in Epithelial Ovarian Carcinoma.	/pubmed/26175151	Burkhalter RJ, Westfall SD, Liu Y, Stack MS.	Wnt/β-catenin, β1 integrins, LPA
																									Ellagic acid inhibits human pancreatic cancer growth in Balb c nude mice.	/pubmed/23684930	Zhao M, Tang SN, Marsh JL, Shankar S, Srivastava RK.	Snail, MMP-2 and MMP-9, Bcl-2, cyclin D1, CDK2, and CDK6				Overexpression of long non-coding RNA-CTD903 inhibits colorectal cancer invasion and migration by repressing Wnt/Ô_-catenin signaling and predicts favorable prognosis.	/pubmed/27035092	Yuan Z, Yu X, Ni B, Chen D, Yang Z, Huang J, Wang J, Chen D, Wang L.	lncRNA‑CTD903, E-cadherin, N-cadherin, β-catenin, ZEB1, ZO-1, Snail, and Twist									The key role of astrocyte elevated gene-1 in CCR6-induced EMT in cervical cancer.	/pubmed/26156805	Zhang J, Zhu D, Lv Q, Yi Y, Li F, Zhang W.	CCL20, AEG-1, Erk1/2
																									Synergistic effect of the Ô_-secretase inhibitor PF-03084014 and docetaxel in breast cancer models.	/pubmed/23408105	Zhang CC, Yan Z, Zong Q, Fang DD, Painter C, Zhang Q, Chen E, Lira ME, John-Baptiste A, Christensen JG.	NUMB, Snail, Slug, and N-cadherin				Silencing of Prrx1b suppresses cellular proliferation, migration, invasion and epithelial-mesenchymal transition in triple-negative breast cancer.	/pubmed/27027510	Lv ZD, Yang ZC, Liu XP, Jin LY, Dong Q, Qu HL, Li FN, Kong B, Sun J, Zhao JJ, Wang HB.	Prrx1b									Microenvironment-Modulated Metastatic CD133+/CXCR4+/EpCAM- Lung Cancer-Initiating Cells Sustain Tumor Dissemination and Correlate with Poor Prognosis.	/pubmed/26141860	Bertolini G, D'Amico L, Moro M, Landoni E, Perego P, Miceli R, Gatti L, Andriani F, Wong D, Caserini R, Tortoreto M, Milione M, Ferracini R, Mariani L, Pastorino U, Roato I, Sozzi G, Roz L.	CXCR4
																									Hypoxia-inducing factors as master regulators of stemness properties and altered metabolism of cancer- and metastasis-initiating cells.	/pubmed/23301832	Mimeault M, Batra SK.	HIF-1α and HIF-2α, CXCR4, Oct-3/4, Nanog and Sox-2, VEGF				Phosphatase of regenerating liver-3 inhibits invasiveness and proliferation in non-small cell lung cancer by regulating the epithelial-mesenchymal transition.	/pubmed/26967563	Lin SY, Lee YX, Yu SL, Chang GC, Chen JJ.	PRL-3, Slug									LGR5 Promotes Breast Cancer Progression and Maintains Stem-Like Cells Through Activation of Wnt/Ô_-Catenin Signaling.	/pubmed/26086949	Yang L, Tang H, Kong Y, Xie X, Chen J, Song C, Liu X, Ye F, Li N, Wang N, Xie X.	LGR5, Wnt/β-catenin
																									Sonic advance: CCN1 regulates sonic hedgehog in pancreatic cancer.	/pubmed/23255052	Leask A.	PDAC, CCN1				Pharmacoproteomic analysis reveals that metapristone (RU486 metabolite) intervenes E-cadherin and vimentin to realize cancer metastasis chemoprevention.	/pubmed/26932781	Yu S, Yan C, Yang X, He S, Liu J, Qin C, Huang C, Lu Y, Tian Z, Jia L.	E-cadherin, vimentin, TGF-β receptor I/II, smad2/3, β-catenin									Interleukin-8 Induces Expression of FOXC1 to Promote Transactivation of CXCR1 and CCL2 in Hepatocellular Carcinoma Cell Lines and Formation of Metastases in Mice.	/pubmed/26065367	Huang W, Chen Z, Zhang L, Tian D, Wang D, Fan D, Wu K, Xia L.	FOXC1, IL8, CCL2
																									Epithelial mesenchymal transition and pancreatic tumor initiating CD44+/EpCAM+ cells are inhibited by Ô_-secretase inhibitor IX.	/pubmed/23094026	Palagani V, El Khatib M, Kossatz U, Bozko P, M’_ller MR, Manns MP, Krech T, Malek NP, Plentz RR.	GSI IX, PDAC				Downregulation of tumor suppressing STF cDNA 3 promotes epithelial-mesenchymal transition and tumor metastasis of osteosarcoma by the Wnt/GSK-3Ô_/Ô_-catenin/Snail signaling pathway.	/pubmed/26845447	Lv YF, Dai H, Yan GN, Meng G, Zhang X, Guo QN.	TSSC3, Wnt3a, LRP5, GSK-3β, CD44, MMP7									P2Y2 nucleotide receptor-mediated extracellular signal-regulated kinases and protein kinase C activation induces the invasion of highly metastatic breast cancer cells.	/pubmed/26063340	Eun SY, Ko YS, Park SW, Chang KC, Kim HJ.	P2Y2R, ERK, PKC and PLC
																									Transforming growth factor Ô_ signaling regulates the invasiveness of normal mammary epithelial cells and the metastasis formation of tumor cells.	/pubmed/25436679	Vafaizadeh V, Graab U, Darvishi T, Machado R, Groner B.	Smad4, Stat3				Wnt/Ô_-catenin pathway is required for epithelial to mesenchymal transition in CXCL12 over expressed breast cancer cells.	/pubmed/26722422	Shan S, Lv Q, Zhao Y, Liu C, Sun Y, Xi K, Xiao J, Li C.	CXCL12, OCT-4, Nanog, and SOX2									CrkL meditates CCL20/CCR6-induced EMT in gastric cancer.	/pubmed/26044596	Han G, Wu D, Yang Y, Li Z, Zhang J, Li C.	CrkL, Erk1/2, Akt, CCR6 and CrkL
																									Immunohistochemical study of the epithelial-mesenchymal transition phenotype in cancer of unknown primary: incidence, correlations and prognostic utility.	/pubmed/22493359	Stoyianni A, Goussia A, Pentheroudakis G, Siozopoulou V, Ioachim E, Krikelis D, Golfinopoulos V, Cervantes A, Bobos M, Fotsis T, Bellou S, Fountzilas G, Malamou-Mitsi V, Pavlidis N.	SNAIL, E-cadherin, N-cadherin, vimentin, OCT4				Silencing of HMGA2 suppresses cellular proliferation, migration, invasion, and epithelial-mesenchymal transition in bladder cancer.	/pubmed/26684800	Shi Z, Li X, Wu D, Tang R, Chen R, Xue S, Sun X.	HMGA2, MMP-2, MMP-9									Specific chemotherapeutic agents induce metastatic behaviour through stromal- and tumour-derived cytokine and angiogenic factor signalling.	/pubmed/25988668	Liu G, Chen Y, Qi F, Jia L, Lu XA, He T, Fu Y, Li L, Luo Y.	CXCR2, CXCR4, S1P/S1PR1, PlGF and PDGF-BB
																									Novel biomarkers and therapeutic targets for optimizing the therapeutic management of melanomas.	/pubmed/22442756	Mimeault M, Batra SK.	EGFR, CXCR4, (PI3K)/Akt, NF-κB, mTOR, MIC-1				FAT4 functions as a tumour suppressor in gastric cancer by modulating Wnt/Ô_-catenin signalling.	/pubmed/26633557	Cai J, Feng D, Hu L, Chen H, Yang G, Cai Q, Gao C, Wei D.	FAT4									TGF-Ô_1-induced EMT promotes targeted migration of breast cancer cells through the lymphatic system by the activation of CCR7/CCL21-mediated chemotaxis.	/pubmed/25961925	Pang MF, Georgoudaki AM, Lambut L, Johansson J, Tabor V, Hagikura K, Jin Y, Jansson M, Alexander JS, Nelson CM, Jakobsson L, Betsholtz C, Sund M, Karlsson MC, Fuxe J.	p38 MAP, TGF-β1, CCL21
																									Notch signaling mediates TGF-Ô_1-induced epithelial-mesenchymal transition through the induction of Snai1.	/pubmed/22330899	Matsuno Y, Coelho AL, Jarai G, Westwick J, Hogaboam CM.	Snai1, TGF-β1				OVOL2, an Inhibitor of WNT Signaling, Reduces Invasive Activities of Human and Mouse Cancer Cells and Is Down-regulated in Human Colorectal Tumors.	/pubmed/26619963	Ye GD, Sun GB, Jiao P, Chen C, Liu QF, Huang XL, Zhang R, Cai WY, Li SN, Wu JF, Liu YJ, Wu RS, Xie YY, Chan EC, Liou YC, Li BA.	OVOL2									Down-regulation of Frizzled-7 expression inhibits migration, invasion, and epithelial-mesenchymal transition of cervical cancer cell lines.	/pubmed/25740178	Deng B, Zhang S, Miao Y, Zhang Y, Wen F, Guo K.	FZD7, MMP2 and MMP9, c-jun, JNK
																									Hypoxia-inducible factor 1Ô± promotes primary tumor growth and tumor-initiating cell activity in breast cancer.	/pubmed/22225988	Schwab LP, Peacock DL, Majumdar D, Ingels JF, Jensen LC, Smith KD, Cushing RC, Seagroves TN.	HIF-1α, CD133				MicroRNA-33b inhibits lung adenocarcinoma cell growth, invasion, and epithelial-mesenchymal transition by suppressing Wnt/Ô_-catenin/ZEB1 signaling.	/pubmed/26459797	Qu J, Li M, An J, Zhao B, Zhong W, Gu Q, Cao L, Yang H, Hu C.	ZEB1 mRNA, miR-33b									STK33 plays an important positive role in the development of human large cell lung cancers with variable metastatic potential.	/pubmed/25662617	Wang P, Cheng H, Wu J, Yan A, Zhang L.	STK33
																									Cancer Stem Cells, EMT, and Developmental Pathway Activation in Pancreatic Tumors.	/pubmed/24213498	Hindriksen S, Bijlsma MF.	Nodal/Activin				IWR-1 inhibits epithelial-mesenchymal transition of colorectal cancer cells through suppressing Wnt/Ô_-catenin signaling as well as survivin expression.	/pubmed/26450645	Lee SC, Kim OH, Lee SK, Kim SJ.	IWR-1									Crk-like adapter protein regulates CCL19/CCR7-mediated epithelial-to-mesenchymal transition via ERK signaling pathway in epithelial ovarian carcinomas.	/pubmed/25636509	Cheng S, Guo J, Yang Q, Yang X.	CCR7 and CrkL, CCL19
																									Activation of Notch-1 enhances epithelial-mesenchymal transition in gefitinib-acquired resistant lung cancer cells.	/pubmed/22173954	Xie M, Zhang L, He CS, Xu F, Liu JL, Hu ZH, Zhao LP, Tian Y.	EGFR-TKI, N1IC				WISP-2 in human gastric cancer and its potential metastatic suppressor role in gastric cancer cells mediated by JNK and PLC-Ô_ pathways.	/pubmed/26291058	Ji J, Jia S, Jia Y, Ji K, Hargest R, Jiang WG.	WISP-2, PLC-γ, ERK, JNK									CCR7 pathway induces epithelial-mesenchymal transition through up-regulation of Snail signaling in gastric cancer.	/pubmed/25572817	Zhang J, Zhou Y, Yang Y.	CCR7, Snail
																									MicroRNA 34c gene down-regulation via DNA methylation promotes self-renewal and epithelial-mesenchymal transition in breast tumor-initiating cells.	/pubmed/22074923	Yu F, Jiao Y, Zhu Y, Wang Y, Zhu J, Cui X, Liu Y, He Y, Park EY, Zhang H, Lv X, Ma K, Su F, Park JH, Song E.	miR-34c gene				New Wnt/Ô_-catenin target genes promote experimental metastasis and migration of colorectal cancer cells through different signals.	/pubmed/26156959	Qi J, Yu Y, Akilli ’_zt’_rk ’_, Holland JD, Besser D, Fritzmann J, Wulf-Goldenberg A, Eckert K, Fichtner I, Birchmeier W.	BAMBI, BOP1, CKS2 and NFIL3									MiR-146b-5p promotes metastasis and induces epithelial-mesenchymal transition in thyroid cancer by targeting ZNRF3.	/pubmed/25547151	Deng X, Wu B, Xiao K, Kang J, Xie J, Zhang X, Fan Y.	miR-146b-5p, Frizzled-6 and LRP6
																									Notch1-Snail1-E-cadherin pathway in metastatic hepatocellular carcinoma.	/pubmed/22052196	Wang XQ, Zhang W, Lui EL, Zhu Y, Lu P, Yu X, Sun J, Yang S, Poon RT, Fan ST.	Notch1-Snail1-E-cadherin				Silencing of LRRFIP1 reverses the epithelial-mesenchymal transition via inhibition of the Wnt/Ô_-catenin signaling pathway.	/pubmed/26047573	Douchi D, Ohtsuka H, Ariake K, Masuda K, Kawasaki S, Kawaguchi K, Fukase K, Oikawa M, Motoi F, Naitoh T, Katayose Y, Egawa S, Unno M.	LRRFIP1									Role of intracellular and extracellular annexin A1 in migration and invasion of human pancreatic carcinoma cells.	/pubmed/25510623	Belvedere R, Bizzarro V, Popolo A, Dal Piaz F, Vasaturo M, Picardi P, Parente L, Petrella A.	ANXA1, FPR-1 and -2
																									Notch activation by phenethyl isothiocyanate attenuates its inhibitory effect on prostate cancer cell migration.	/pubmed/22039516	Kim SH, Sehrawat A, Sakao K, Hahm ER, Singh SV.	Presenilin1 and Nicastrin (PC-3)				Profilin 2 promotes migration, invasion, and stemness of HT29 human colorectal cancer stem cells.	/pubmed/25964982	Kim MJ, Lee YS, Han GY, Lee HN, Ahn C, Kim CW.	SOX2, profilin 2									P2X7 mediates ATP-driven invasiveness in prostate cancer cells.	/pubmed/25486274	Qiu Y, Li WH, Zhang HQ, Liu Y, Tian XX, Fang WG.	P2X7
																									Activated K-ras and INK4a/Arf deficiency cooperate during the development of pancreatic cancer by activation of Notch and NF-Ô_B signaling pathways.	/pubmed/21673986	Wang Z, Banerjee S, Ahmad A, Li Y, Azmi AS, Gunn JR, Kong D, Bao B, Ali S, Gao J, Mohammad RM, Miele L, Korc M, Sarkar FH.	PDAC , K-ras and INK4a/Arf				FOXQ1 mediates the crosstalk between TGF-Ô_ and Wnt signaling pathways in the progression of colorectal cancer.	/pubmed/25955104	Peng X, Luo Z, Kang Q, Deng D, Wang Q, Peng H, Wang S, Wei Z.	FOXQ1									CXCR2/CXCL5 axis contributes to epithelial-mesenchymal transition of HCC cells through activating PI3K/Akt/GSK-3Ô_/Snail signaling.	/pubmed/25462858	Zhou SL, Zhou ZJ, Hu ZQ, Li X, Huang XW, Wang Z, Fan J, Dai Z, Zhou J.	CXCR2/CXCL5
																									The Notch ligand Jagged2 promotes lung adenocarcinoma metastasis through a miR-200-dependent pathway in mice.	/pubmed/21403400	Yang Y, Ahn YH, Gibbons DL, Zang Y, Lin W, Thilaganathan N, Alvarez CA, Moreira DC, Creighton CJ, Gregory PA, Goodall GJ, Kurie JM.	Jagged2, miR-200, Gata3				MiR-429 increases the metastatic capability of HCC via regulating classic Wnt pathway rather than epithelial-mesenchymal transition.	/pubmed/25931210	Tang J, Li L, Huang W, Sui C, Yang Y, Lin X, Hou G, Chen X, Fu J, Yuan S, Li S, Wen W, Tang S, Cao D, Wu M, Chen L, Wang H.	miR-429, PTEN									Alternatively activated (M2) macrophages promote tumour growth and invasiveness in hepatocellular carcinoma.	/pubmed/25450711	Yeung OW, Lo CM, Ling CC, Qi X, Geng W, Li CX, Ng KT, Forbes SJ, Guan XY, Poon RT, Fan ST, Man K.	CD163, CCL22
																									DCAMKL-1 regulates epithelial-mesenchymal transition in human pancreatic cells through a miR-200a-dependent mechanism.	/pubmed/21285251	Sureban SM, May R, Lightfoot SA, Hoskins AB, Lerner M, Brackett DJ, Postier RG, Ramanujam R, Mohammed A, Rao CV, Wyche JH, Anant S, Houchen CW.	DCAMKL-1				SULF2 overexpression positively regulates tumorigenicity of human prostate cancer cells.	/pubmed/25887999	Vicente CM, Lima MA, Nader HB, Toma L.	SULF2									A noncanonical Frizzled2 pathway regulates epithelial-mesenchymal transition and metastasis.	/pubmed/25417160	Gujral TS, Chan M, Peshkin L, Sorger PK, Kirschner MW, MacBeath G.	Fyn and Stat3, Fzd2, Wnt5a/b
																									The ZEB1/miR-200 feedback loop controls Notch signalling in cancer cells.	/pubmed/21224848	Brabletz S, Bajdak K, Meidhof S, Burk U, Niedermann G, Firat E, Wellner U, Dimmler A, Faller G, Schubert J, Brabletz T.	ZEB1, Jag1				Silencing of MICAL-L2 suppresses malignancy of ovarian cancer by inducing mesenchymal-epithelial transition.	/pubmed/25864591	Zhu LY, Zhang WM, Yang XM, Cui L, Li J, Zhang YL, Wang YH, Ao JP, Ma MZ, Lu H, Ren Y, Xu SH, Yang GD, Song WW, Wang JH, Zhang XD, Zhang R, Zhang ZG.	MICAL-L2									BRMS1L suppresses breast cancer metastasis by inducing epigenetic silence of FZD10.	/pubmed/25406648	Gong C, Qu S, Lv XB, Liu B, Tan W, Nie Y, Su F, Liu Q, Yao H, Song E.	BRMS1L, FZD10
																									Molecular signature of epithelial-mesenchymal transition (EMT) in human prostate cancer bone metastasis.	/pubmed/21139809	Sethi S, Macoska J, Chen W, Sarkar FH.	E-cadherin, Vimentin, ZEB1, Notch-1, PDGF-D and NF-κB				WNT5A promotes stemness characteristics in nasopharyngeal carcinoma cells leading to metastasis and tumorigenesis.	/pubmed/25823923	Qin L, Yin YT, Zheng FJ, Peng LX, Yang CF, Bao YN, Liang YY, Li XJ, Xiang YQ, Sun R, Li AH, Zou RH, Pei XQ, Huang BJ, Kang TB, Liao DF, Zeng YX, Williams BO, Qian CN.	WNT5A, PKC									Endothelin A receptor/Ô_-arrestin signaling to the Wnt pathway renders ovarian cancer cells resistant to chemotherapy.	/pubmed/25377471	Rosan’_ L, Cianfrocca R, Tocci P, Spinella F, Di Castro V, Caprara V, Semprucci E, Ferrandina G, Natali PG, Bagnato A.	β-arr1, ARRB1, ET-1
																									Notch3 in human breast cancer cell lines regulates osteoblast-cancer cell interactions and osteolytic bone metastasis.	/pubmed/20651241	Zhang Z, Wang H, Ikeda S, Fahey F, Bielenberg D, Smits P, Hauschka PV.	Smad3/Smad2, Notch3				Wnt5a and Wnt11 regulate mammalian anterior-posterior axis elongation.	/pubmed/25813538	Andre P, Song H, Kim W, Kispert A, Yang Y.	Wnt11, Wnt5a									CXCR7 signaling induced epithelial-mesenchymal transition by AKT and ERK pathways in epithelial ovarian carcinomas.	/pubmed/25359618	Yu H, Zhang L, Liu P.	CXCR7, CCL19
																									Hypoxia potentiates Notch signaling in breast cancer leading to decreased E-cadherin expression and increased cell migration and invasion.	/pubmed/20010940	Chen J, Imanaka N, Chen J, Griffin JD.	HIF-1alpha and HIF-2alpha , HES1 and HEY1				Hepatocyte nuclear factor 4Ô± suppresses the aggravation of colon carcinoma.	/pubmed/25808746	Yao HS, Wang J, Zhang XP, Wang LZ, Wang Y, Li XX, Jin KZ, Hu ZQ, Wang WJ.	HNF4α									Follicle-stimulating hormone induced epithelial-mesenchymal transition of epithelial ovarian cancer cells through follicle-stimulating hormone receptor PI3K/Akt-Snail signaling pathway.	/pubmed/25340291	Yang Y, Zhang J, Zhu Y, Zhang Z, Sun H, Feng Y.	FSHR, PI3K/Akt-Snail,
																									Notch1 regulates the functional contribution of RhoC to cervical carcinoma progression.	/pubmed/19953094	Srivastava S, Ramdass B, Nagarajan S, Rehman M, Mukherjee G, Krishna S.	RhoC, pAkt and Notch1				ZNF488 Enhances the Invasion and Tumorigenesis in Nasopharyngeal Carcinoma Via the Wnt Signaling Pathway Involving Epithelial Mesenchymal Transition.	/pubmed/25779368	Zong D, Yin L, Zhong Q, Guo WJ, Xu JH, Jiang N, Lin ZR, Li MZ, Han P, Xu L, He X, Zeng MS.	ZNF488									Tpl2 induces castration resistant prostate cancer progression and metastasis.	/pubmed/25274482	Lee HW, Cho HJ, Lee SJ, Song HJ, Cho HJ, Park MC, Seol HJ, Lee JI, Kim S, Lee HM, Choi HY, Nam DH, Joo KM.	Tpl2
																									Acquisition of epithelial-mesenchymal transition phenotype of gemcitabine-resistant pancreatic cancer cells is linked with activation of the notch signaling pathway.	/pubmed/19276344	Wang Z, Li Y, Kong D, Banerjee S, Ahmad A, Azmi AS, Ali S, Abbruzzese JL, Gallick GE, Sarkar FH.	vimentin, ZEB1, Slug, Snail, and nuclear factor-kappaB, Notch-2				PIK3R1 negatively regulates the epithelial-mesenchymal transition and stem-like phenotype of renal cancer cells through the AKT/GSK3Ô_/CTNNB1 signaling pathway.	/pubmed/25757764	Lin Y, Yang Z, Xu A, Dong P, Huang Y, Liu H, Li F, Wang H, Xu Q, Wang Y, Sun D, Zou Y, Zou X, Wang Y, Zhang D, Liu H, Wu X, Zhang M, Fu Y, Cai Z, Liu C, Wu S.	PIK3R1, CTNNB1									Down-regulation of 5-HT1B and 5-HT1D receptors inhibits proliferation, clonogenicity and invasion of human pancreatic cancer cells.	/pubmed/25268648	Gurbuz N, Ashour AA, Alpay SN, Ozpolat B.	5-HT1B and 5-HT1D, ZEB1 and Snail
																									Notch signaling mediates hypoxia-induced tumor cell migration and invasion.	/pubmed/18427106	Sahlgren C, Gustafsson MV, Jin S, Poellinger L, Lendahl U.	LOX, HIF-1alpha, Snail-1				Down-regulation of Frizzled-7 expression inhibits migration, invasion, and epithelial-mesenchymal transition of cervical cancer cell lines.	/pubmed/25740178	Deng B, Zhang S, Miao Y, Zhang Y, Wen F, Guo K.	FZD7, JNK, c-jun									Thrombin conducts epithelialŠ—•mesenchymal transition via proteaseŠ—•activated receptorŠ—•1 in human gastric cancer.	/pubmed/25231630	Otsuki T, Fujimoto D, Hirono Y, Goi T, Yamaguchi A.	PAR1
																									Jagged1-mediated Notch activation induces epithelial-to-mesenchymal transition through Slug-induced repression of E-cadherin.	/pubmed/17984306	Leong KG, Niessen K, Kulic I, Raouf A, Eaves C, Pollet I, Karsan A.	Jagged1 and Notch1, Slug, E-cadherin				SOX9 Overexpression Promotes Glioma Metastasis via Wnt/Ô_-Catenin Signaling.	/pubmed/25716338	Liu H, Liu Z, Jiang B, Peng R, Ma Z, Lu J.	SOX9									The essential roles of CCR7 in epithelial-to-mesenchymal transition induced by hypoxia in epithelial ovarian carcinomas.	/pubmed/25168373	Cheng S, Han L, Guo J, Yang Q, Zhou J, Yang X.	CCR7
																									Notch promotes epithelial-mesenchymal transition during cardiac development and oncogenic transformation.	/pubmed/14701881	Timmerman LA, Grego-Bessa J, Raya A, Bertr’n E, P’©rez-Pomares JM, D’_ez J, Aranda S, Palomo S, McCormick F, Izpis’_a-Belmonte JC, de la Pompa JL.	Snail, N1IC				FOXO3a modulates WNT/Ô_-catenin signaling and suppresses epithelial-to-mesenchymal transition in prostate cancer cells.	/pubmed/25578861	Liu H, Yin J, Wang H, Jiang G, Deng M, Zhang G, Bu X, Cai S, Du J, He Z.	FOXO3a									SDF-1/CXCR4 promotes epithelial-mesenchymal transition and progression of colorectal cancer by activation of the Wnt/Ô_-catenin signaling pathway.	/pubmed/25150783	Hu TH, Yao Y, Yu S, Han LL, Wang WJ, Guo H, Tian T, Ruan ZP, Kang XM, Wang J, Wang SH, Nan KJ.	SDF-1, CXCR4
																																Berberine inhibits the metastatic ability of prostate cancer cells by suppressing epithelial-to-mesenchymal transition (EMT)-associated genes with predictive and prognostic relevance.	/pubmed/25552920	Liu CH, Tang WC, Sia P, Huang CC, Yang PM, Wu MH, Lai IL, Lee KH.	BMP7, NODAL and Snail									CCL21/CCR7 axis activating chemotaxis accompanied with epithelial-mesenchymal transition in human breast carcinoma.	/pubmed/25142946	Li F, Zou Z, Suo N, Zhang Z, Wan F, Zhong G, Qu Y, Ntaka KS, Tian H.	CCL21/CCR7
																																MiR-146b-5p promotes metastasis and induces epithelial-mesenchymal transition in thyroid cancer by targeting ZNRF3.	/pubmed/25547151	Deng X, Wu B, Xiao K, Kang J, Xie J, Zhang X, Fan Y.	(miR)-146b-5p, ZNRF3									The atypical chemokine receptor CCX-CKR regulates metastasis of mammary carcinoma via an effect on EMT.	/pubmed/25027038	Harata-Lee Y, Turvey ME, Brazzatti JA, Gregor CE, Brown MP, Smyth MJ, Comerford I, McColl SR.	CCL19, CCL21
																																A noncanonical Frizzled2 pathway regulates epithelial-mesenchymal transition and metastasis.	/pubmed/25417160	Gujral TS, Chan M, Peshkin L, Sorger PK, Kirschner MW, MacBeath G.	Fzd2, Fyn and Stat3									KiSS1-induced GPR54 signaling inhibits breast cancer cell migration and epithelial-mesenchymal transition via protein kinase D1.	/pubmed/24894166	Tan K, Cho SG, Luo W, Yi T, Wu X, Siwko S, Liu M, Yuan W.	KiSS1/GPR54, PKD1
																																BRMS1L suppresses breast cancer metastasis by inducing epigenetic silence of FZD10.	/pubmed/25406648	Gong C, Qu S, Lv XB, Liu B, Tan W, Nie Y, Su F, Liu Q, Yao H, Song E.	BRMS1L									Loss of the novel tumour suppressor and polarity gene Trim62 (Dear1) synergizes with oncogenic Ras in invasive lung cancer.	/pubmed/24890125	Quint’s-Cardama A, Post SM, Solis LM, Xiong S, Yang P, Chen N, Wistuba II, Killary AM, Lozano G.	TRIM62
																																MicroRNA-200 (miR-200) cluster regulation by achaete scute-like 2 (Ascl2): impact on the epithelial-mesenchymal transition in colon cancer cells.	/pubmed/25371200	Tian Y, Pan Q, Shang Y, Zhu R, Ye J, Liu Y, Zhong X, Li S, He Y, Chen L, Zhao J, Chen W, Peng Z, Wang R.	ZEB1/2, Ascl2, miR-200b, miR-200a, miR-429, miR-200c, and miR-141, E-box2									[The experimental study of CXC subfamily receptor 4 modulating oral squamous cell carcinoma epithelial-mesenchymal transition to influence lymphatic metastasis in vitro].	/pubmed/24820786	Zhang S, Wang B, Zhou X, Yue K, Wang X.	CXCR-4
																																Mechanism and biological significance of the overexpression of IFITM3 in gastric cancer.	/pubmed/25270246	Hu J, Wang S, Zhao Y, Guo Q, Zhang D, Chen J, Li J, Fei Q, Sun Y.	IFITM3, MMP-2 and MMP-9									Novel regulatory program for norepinephrine-induced epithelial-mesenchymal transition in gastric adenocarcinoma cell lines.	/pubmed/24815301	Shan T, Cui X, Li W, Lin W, Li Y, Chen X, Wu T.	norepinephrine (NE), β2 -AR-HIF-1α-Snail
																																MiR-29c mediates epithelial-to-mesenchymal transition in human colorectal carcinoma metastasis via PTP4A and GNA13 regulation of Ô_-catenin signaling.	/pubmed/25193986	Zhang JX, Mai SJ, Huang XX, Wang FW, Liao YJ, Lin MC, Kung HF, Zeng YX, Xie D.	GNA13 and PTP4A									The Mu opioid receptor promotes opioid and growth factor-induced proliferation, migration and Epithelial Mesenchymal Transition (EMT) in human lung cancer.	/pubmed/24662916	Lennon FE, Mirzapoiazova T, Mambetsariev B, Poroyko VA, Salgia R, Moss J, Singleton PA.	MOR
																																SRF expedites metastasis and modulates the epithelial to mesenchymal transition by regulating miR-199a-5p expression in human gastric cancer.	/pubmed/25080937	Zhao X, He L, Li T, Lu Y, Miao Y, Liang S, Guo H, Bai M, Xie H, Luo G, Zhou L, Shen G, Guo C, Bai F, Sun S, Wu K, Nie Y, Fan D.	serum response factor (SRF), miR-199a-5p and miR-199a-3p									Prostaglandin EŠää receptor EP2 mediates Snail expression in hepatocellular carcinoma cells.	/pubmed/24626807	Cheng SY, Zhang H, Zhang M, Xia SK, Bai XM, Zhang L, Ma J, Rong R, Wang YP, Du MZ, Wang J, Chen M, Shi F, Yang QY, Leng J.	PGE2
																																Shisa3 is associated with prolonged survival through promoting Ô_-catenin degradation in lung cancer.	/pubmed/25036006	Chen CC, Chen HY, Su KY, Hong QS, Yan BS, Chen CH, Pan SH, Chang YL, Wang CJ, Hung PF, Yuan S, Chang GC, Chen JJ, Yang PC, Yang YC, Yu SL.	Shisa3									Galectin-1 upregulates CXCR4 to promote tumor progression and poor outcome in kidney cancer.	/pubmed/24511119	Huang CS, Tang SJ, Chung LY, Yu CP, Ho JY, Cha TL, Hsieh CC, Wang HH, Sun GH, Sun KH.	Galectin-1, CXCR4
																																Overexpression of SOX2 promotes migration, invasion, and epithelial-mesenchymal transition through the Wnt/Ô_-catenin pathway in laryngeal cancer Hep-2 cells.	/pubmed/24833089	Yang N, Hui L, Wang Y, Yang H, Jiang X.	SOX2, β-catenin									CXCR4 drives the metastatic phenotype in breast cancer through induction of CXCR2 and activation of MEK and PI3K pathways.	/pubmed/24403602	Sobolik T, Su YJ, Wells S, Ayers GD, Cook RS, Richmond A.	CXCR4, CXCR2
																																LRP5 knockdown: effect on prostate cancer invasion growth and skeletal metastasis in vitro and in vivo.	/pubmed/24403228	Rabbani SA, Arakelian A, Farookhi R.	LRP5, -6,									Microenvironmental stimuli affect Endothelin-1 signaling responsible for invasiveness and osteomimicry of bone metastasis from breast cancer.	/pubmed/24373848	Bendinelli P, Maroni P, Matteucci E, Luzzati A, Perrucchini G, Desiderio MA.	ETAR and ETBR, HGF, TGF-β
																																Upregulation of Wnt5a promotes epithelial-to-mesenchymal transition and metastasis of pancreatic cancer cells.	/pubmed/24156409	Bo H, Zhang S, Gao L, Chen Y, Zhang J, Chang X, Zhu M.	Wnt5a, Ror2									CXCL13-CXCR5 co-expression regulates epithelial to mesenchymal transition of breast cancer cells during lymph node metastasis.	/pubmed/24337540	Biswas S, Sengupta S, Roy Chowdhury S, Jana S, Mandal G, Mandal PK, Saha N, Malhotra V, Gupta A, Kuprash DV, Bhattacharyya A.	CXCR5, CXCL13, RANKL
																																LncRNA expression signatures of twist-induced epithelial-to-mesenchymal transition in MCF10A cells.	/pubmed/24113349	Hu P, Yang J, Hou Y, Zhang H, Zeng Z, Zhao L, Yu T, Tang X, Tu G, Cui X, Liu M.	mTOR, Hedgehog and P53									RhoE promotes metastasis in gastric cancer through a mechanism dependent on enhanced expression of CXCR4.	/pubmed/24312338	Feng B, Li K, Zhong H, Ren G, Wang H, Shang Y, Bai M, Liang J, Wang X, Fan D.	RhoE
																																HMGA1 promotes metastatic processes in basal-like breast cancer regulating EMT and stemness.	/pubmed/23945276	Pegoraro S, Ros G, Piazza S, Sommaggio R, Ciani Y, Rosato A, Sgarra R, Del Sal G, Manfioletti G.	HMGA1									CRF2 signaling is a novel regulator of cellular adhesion and migration in colorectal cancer cells.	/pubmed/24260200	Ducarouge B, Pelissier-Rota M, Lain’© M, Cristina N, Vachez Y, Scoazec JY, Bonaz B, Jacquier-Sarlin M.	CRF2
																																High levels of secreted frizzled-related protein 1 correlate with poor prognosis and promote tumourigenesis in gastric cancer.	/pubmed/23927957	Qu Y, Ray PS, Li J, Cai Q, Bagaria SP, Moran C, Sim MS, Zhang J, Turner RR, Zhu Z, Cui X, Liu B.	sFRP1									Aberrant expression of CXCR4 significantly contributes to metastasis and predicts poor clinical outcome in breast cancer.	/pubmed/24256053	Yang P, Liang SX, Huang WH, Zhang HW, Li XL, Xie LH, Du CW, Zhang GJ.	CXCR4
																																EphA2 promotes epithelial-mesenchymal transition through the Wnt/Ô_-catenin pathway in gastric cancer cells.	/pubmed/23752181	Huang J, Xiao D, Li G, Ma J, Chen P, Yuan W, Hou F, Ge J, Zhong M, Tang Y, Xia X, Chen Z.	EphA2, TCF4, Cyclin-D1 and c-Myc									Platelet P2Y12 is involved in murine pulmonary metastasis.	/pubmed/24236201	Wang Y, Sun Y, Li D, Zhang L, Wang K, Zuo Y, Gartner TK, Liu J.	P2Y12, TGFβ1
																																The Wnt gatekeeper SFRP4 modulates EMT, cell migration and downstream Wnt signalling in serous ovarian cancer cells.	/pubmed/23326605	Ford CE, Jary E, Ma SS, Nixdorf S, Heinzelmann-Schwarz VA, Ward RL.	SFRP4, Axin2, CyclinD1 and Myc									MicroRNAs, miR-154, miR-299-5p, miR-376a, miR-376c, miR-377, miR-381, miR-487b, miR-485-3p, miR-495 and miR-654-3p, mapped to the 14q32.31 locus, regulate proliferation, apoptosis, migration and invasion in metastatic prostate cancer cells.	/pubmed/24166498	Formosa A, Markert EK, Lena AM, Italiano D, Finazzi-Agro' E, Levine AJ, Bernardini S, Garabadgiu AV, Melino G, Candi E.	miR-154, -299-5p, -376a, -376c, -377, -381, -487b, -485-3p, -495 and -654-3p
																																OCT4 regulates epithelial-mesenchymal transition and its knockdown inhibits colorectal cancer cell migration and invasion.	/pubmed/23076549	Dai X, Ge J, Wang X, Qian X, Zhang C, Li X.	2019-10-04									The effect of CXCR4 silencing on epithelial-mesenchymal transition related genes in glioma U87 cells.	/pubmed/24150861	Zhu Y, Yang P, Wang Q, Hu J, Xue J, Li G, Zhang G, Li X, Li W, Zhou C, Zhao M, Wang D.	CXCR4, NF-κB, AP-1, Snail, and twist
																																Silencing SOX2 induced mesenchymal-epithelial transition and its expression predicts liver and lymph node metastasis of CRC patients.	/pubmed/22912670	Han X, Fang X, Lou X, Hua D, Ding W, Foltz G, Hood L, Yuan Y, Lin B.	SOX2									Resolvin D1 inhibits TGF-Ô_1-induced epithelial mesenchymal transition of A549 lung cancer cells via lipoxin A4 receptor/formyl peptide receptor 2 and GPR32.	/pubmed/24120851	Lee HJ, Park MK, Lee EJ, Lee CH.	ALX/FPR2, GPR32
																																PI3K/Akt to GSK3Ô_/Ô_-catenin signaling cascade coordinates cell colonization for bladder cancer bone metastasis through regulating ZEB1 transcription.	/pubmed/22906492	Wu K, Fan J, Zhang L, Ning Z, Zeng J, Zhou J, Li L, Chen Y, Zhang T, Wang X, Hsieh JT, He D.	ZEB1, MMP2, GSK3β									Bone-stromal cells up-regulate tumourigenic markers in a tumour-stromal 3D model of prostate cancer.	/pubmed/24073816	Windus LC, Glover TT, Avery VM.	CXCR7
																																Genome-wide screening reveals an EMT molecular network mediated by Sonic hedgehog-Gli1 signaling in pancreatic cancer cells.	/pubmed/22900095	Xu X, Zhou Y, Xie C, Wei SM, Gan H, He S, Wang F, Xu L, Lu J, Dai W, He L, Chen P, Wang X, Guo C.	TM4SF, S100A4, Gli1									Targeting the androgen receptor with siRNA promotes prostate cancer metastasis through enhanced macrophage recruitment via CCL2/CCR2-induced STAT3 activation.	/pubmed/23982944	Izumi K, Fang LY, Mizokami A, Namiki M, Li L, Lin WJ, Chang C.	CCL2, STAT3
																																Fas-associated factor 1 is a scaffold protein that promotes Ô_-transducin repeat-containing protein (Ô_-TrCP)-mediated Ô_-catenin ubiquitination and degradation.	/pubmed/22730322	Zhang L, Zhou F, Li Y, Drabsch Y, Zhang J, van Dam H, ten Dijke P.	FAF1, β-TrCP									Complementary populations of human adipose CD34+ progenitor cells promote growth, angiogenesis, and metastasis of breast cancer.	/pubmed/23918796	Orecchioni S, Gregato G, Martin-Padura I, Reggiani F, Braidotti P, Mancuso P, Calleri A, Quarna J, Marighetti P, Aldeni C, Pruneri G, Martella S, Manconi A, Petit JY, Rietjens M, Bertolini F.	CXCR4
																																Upregulated MALAT-1 contributes to bladder cancer cell migration by inducing epithelial-to-mesenchymal transition.	/pubmed/22722759	Ying L, Chen Q, Wang Y, Zhou Z, Huang Y, Qiu F.	MALAT-1, ZEB1, ZEB2 and Slug									DEAR1 is a chromosome 1p35 tumor suppressor and master regulator of TGF-Ô_-driven epithelial-mesenchymal transition.	/pubmed/23838884	Chen N, Balasenthil S, Reuther J, Frayna A, Wang Y, Chandler DS, Abruzzo LV, Rashid A, Rodriguez J, Lozano G, Cao Y, Lokken E, Chen J, Frazier ML, Sahin AA, Wistuba II, Sen S, Lott ST, Killary AM.	DEAR1, SNAIL2 ,TGF-β-SMAD3
																																Klotho inhibits the capacity of cell migration and invasion in cervical cancer.	/pubmed/22710352	Chang B, Kim J, Jeong D, Jeong Y, Jeon S, Jung SI, Yang Y, Kim KI, Lim JS, Kim C, Lee MS.	Klotho, c-Myc, cyclin D1									Overactivation of the TGF-Ô_ pathway confers a mesenchymal-like phenotype and CXCR4-dependent migratory properties to liver tumor cells.	/pubmed/23813475	Bertran E, Crosas-Molist E, Sancho P, Caja L, Lopez-Luque J, Navarro E, Egea G, Lastra R, Serrano T, Ramos E, Fabregat I.	TGF-β, TGFBR1, CXCR4
																																The iron chelators Dp44mT and DFO inhibit TGF-Ô_-induced epithelial-mesenchymal transition via up-regulation of N-Myc downstream-regulated gene 1 (NDRG1).	/pubmed/22453918	Chen Z, Zhang D, Yue F, Zheng M, Kovacevic Z, Richardson DR.	NDRG1, TGF-β/SMAD									Molecular pathways: YAP and TAZ take center stage in organ growth and tumorigenesis.	/pubmed/23797907	Piccolo S, Cordenonsi M, Dupont S.	YAP and TAZ
																																Progesterone inhibits epithelial-to-mesenchymal transition in endometrial cancer.	/pubmed/22295114	van der Horst PH, Wang Y, Vandenput I, K’_hne LC, Ewing PC, van Ijcken WF, van der Zee M, Amant F, Burger CW, Blok LJ.	CXCL14, DKK1, DKK4, PEG10 and WIF1									CX3CL1 promotes breast cancer via transactivation of the EGF pathway.	/pubmed/23720051	Tard’guila M, Mira E, Garc’_a-Cabezas MA, Feijoo AM, Quintela-Fandino M, Azcoitia I, Lira SA, Ma’±es S.	CX3CL1
																																Hepatic carcinoma-associated fibroblasts promote an adaptative response in colorectal cancer cells that inhibit proliferation and apoptosis: nonresistant cells die by nonapoptotic cell death.	/pubmed/22028619	Berdiel-Acer M, Bohem ME, L’_pez-Doriga A, Vidal A, Salazar R, Mart’_nez-Iniesta M, Santos C, Sanjuan X, Villanueva A, Mollev’_ DG.	CAFs									The hypoxia factor Hif-1Ô± controls neural crest chemotaxis and epithelial to mesenchymal transition.	/pubmed/23712262	Barriga EH, Maxwell PH, Reyes AE, Mayor R.	Hif-1α, Twist, SDF-1
																																Klotho inhibits transforming growth factor-beta1 (TGF-beta1) signaling and suppresses renal fibrosis and cancer metastasis in mice.	/pubmed/21209102	Doi S, Zou Y, Togao O, Pastor JV, John GB, Wang L, Shiizaki K, Gotschall R, Schiavi S, Yorioka N, Takahashi M, Boothman DA, Kuro-o M.	Klotho, TGF-β1									Senescent fibroblasts enhance early skin carcinogenic events via a paracrine MMP-PAR-1 axis.	/pubmed/23675494	Malaquin N, Vercamer C, Bouali F, Martien S, Deruy E, Wernert N, Chwastyniak M, Pinet F, Abbadie C, Pourtier A.	PAR-1, MMP
																																The Wnt inhibitory factor 1 restoration in prostate cancer cells was associated with reduced tumor growth, decreased capacity of cell migration and invasion and a reversal of epithelial to mesenchymal transition.	/pubmed/20573255	Yee DS, Tang Y, Li X, Liu Z, Guo Y, Ghaffar S, McQueen P, Atreya D, Xie J, Simoneau AR, Hoang BH, Zi X.	WIF1, MMP-2 and -9									Recruitment of mesenchymal stem cells into prostate tumours promotes metastasis.	/pubmed/23653207	Jung Y, Kim JK, Shiozawa Y, Wang J, Mishra A, Joseph J, Berry JE, McGee S, Lee E, Sun H, Wang J, Jin T, Zhang H, Dai J, Krebsbach PH, Keller ET, Pienta KJ, Taichman RS.	CXCL16
																																Redox mechanisms switch on hypoxia-dependent epithelial-mesenchymal transition in cancer cells.	/pubmed/18791199	Cannito S, Novo E, Compagnone A, Valfr’å di Bonzo L, Busletta C, Zamara E, Paternostro C, Povero D, Bandino A, Bozzo F, Cravanzola C, Bravoco V, Colombatto S, Parola M.	ROS, (HIF)-1alpha, GSK-3beta									KISS1R induces invasiveness of estrogen receptor-negative human mammary epithelial and breast cancer cells.	/pubmed/23525242	Cvetkovic D, Dragan M, Leith SJ, Mir ZM, Leong HS, Pampillo M, Lewis JD, Babwah AV, Bhattacharya M.	KISS1R
																																												Nonclassical activation of Hedgehog signaling enhances multidrug resistance and makes cancer cells refractory to Smoothened-targeting Hedgehog inhibition.	/pubmed/23508962	Das S, Samant RS, Shevde LA.	SMOH, GLI1
																																												Hedgehog signaling pathway regulates human pancreatic cancer cell proliferation and metastasis.	/pubmed/23292285	Hao K, Tian XD, Qin CF, Xie XH, Yang YM.	PI3K/AKT , Hh
																																												Ô_-arrestin-1 is a nuclear transcriptional regulator of endothelin-1-induced Ô_-catenin signaling.	/pubmed/23208497	Rosan’_ L, Cianfrocca R, Tocci P, Spinella F, Di Castro V, Spadaro F, Salvati E, Biroccio AM, Natali PG, Bagnato A.	β-arr1, ET-1, β-catenin
																																												Hypoxia enhances colon cancer migration and invasion through promotion of epithelial-mesenchymal transition.	/pubmed/22959209	Hongo K, Tsuno NH, Kawai K, Sasaki K, Kaneko M, Hiyoshi M, Murono K, Tada N, Nirei T, Sunami E, Takahashi K, Nagawa H, Kitayama J, Watanabe T.	α2, α5, and β1 integrin
																																												CD133(+)CXCR4(+) colon cancer cells exhibit metastatic potential and predict poor prognosis of patients.	/pubmed/22871210	Zhang SS, Han ZP, Jing YY, Tao SF, Li TJ, Wang H, Wang Y, Li R, Yang Y, Zhao X, Xu XD, Yu ED, Rui YC, Liu HJ, Zhang L, Wei LX.	CXCR4,SDF-1
																																												Angiotensin II enhances epithelial-to-mesenchymal transition through the interaction between activated hepatic stellate cells and the stromal cell-derived factor-1/CXCR4 axis in intrahepatic cholangiocarcinoma.	/pubmed/22664794	Okamoto K, Tajima H, Nakanuma S, Sakai S, Makino I, Kinoshita J, Hayashi H, Nakamura K, Oyama K, Nakagawara H, Fujita H, Takamura H, Ninomiya I, Kitagawa H, Fushida S, Fujimura T, Harada S, Wakayama T, Iseki S, Ohta T.	angiotensin II (AngII), CXCR4, AT-1
																																												Role of chemokine receptor CXCR7 in bladder cancer progression.	/pubmed/22525723	Hao M, Zheng J, Hou K, Wang J, Chen X, Lu X, Bo J, Xu C, Shen K, Wang J.	CXCR7, IL-8 or VEGF
																																												Hypoxia promotes dissemination of multiple myeloma through acquisition of epithelial to mesenchymal transition-like features.	/pubmed/22394600	Azab AK, Hu J, Quang P, Azab F, Pitsillides C, Awwad R, Thompson B, Maiso P, Sun JD, Hart CP, Roccaro AM, Sacco A, Ngo HT, Lin CP, Kung AL, Carrasco RD, Vanderkerken K, Ghobrial IM.	CXCR4, hypoxia
																																												Dickkopf-1 inhibits epithelial-mesenchymal transition of colon cancer cells and contributes to colon cancer suppression.	/pubmed/22321022	Qi L, Sun B, Liu Z, Li H, Gao J, Leng X.	Dkk1, Snail and Twist
																																												ROCK cooperated with ET-1 to induce epithelial to mesenchymal transition through SLUG in human ovarian cancer cells.	/pubmed/22232246	Peng J, Zhang G, Wang Q, Huang J, Ma H, Zhong Y, Zhou F, Xie C, Zhang A.	ROCK, ET-1, SLUG
																																												Platelet adhesion and degranulation induce pro-survival and pro-angiogenic signalling in ovarian cancer cells.	/pubmed/22022533	Egan K, Crowley D, Smyth P, O'Toole S, Spillane C, Martin C, Gallagher M, Canney A, Norris L, Conlon N, McEvoy L, Ffrench B, Stordal B, Keegan H, Finn S, McEneaney V, Laios A, Ducr’©e J, Dunne E, Smith L, Berndt M, Sheils O, et al.	P2Y12 and P2Y1
																																												Green tea catechins reduce invasive potential of human melanoma cells by targeting COX-2, PGE2 receptors and epithelial-to-mesenchymal transition.	/pubmed/22022384	Singh T, Katiyar SK.	retracted article
																																												Lysophosphatidic acid and sphingosine-1-phosphate promote morphogenesis and block invasion of prostate cancer cells in three-dimensional organotypic models.	/pubmed/21996742	H’_rm’_ V, Knuuttila M, Virtanen J, Mirtti T, Kohonen P, Kovanen P, Happonen A, Kaewphan S, Ahonen I, Kallioniemi O, Grafstr’_m R, L’_tj’_nen J, Nees M.	LPAR1, LPA
																																												Mesenchymal transition and dissemination of cancer cells is driven by myeloid-derived suppressor cells infiltrating the primary tumor.	/pubmed/21980263	Toh B, Wang X, Keeble J, Sim WJ, Khoo K, Wong WC, Kato M, Prevost-Blondel A, Thiery JP, Abastado JP.	CXCL5
																																												Effects of SDF-1-CXCR4 signaling on microRNA expression and tumorigenesis in estrogen receptor-alpha (ER-Ô±)-positive breast cancer cells.	/pubmed/21906588	Rhodes LV, Bratton MR, Zhu Y, Tilghman SL, Muir SE, Salvo VA, Tate CR, Elliott S, Nephew KP, Collins-Burow BM, Burow ME.	SDF-1/CXCR4
																																												Remodeling of purinergic receptor-mediated Ca2+ signaling as a consequence of EGF-induced epithelial-mesenchymal transition in breast cancer cells.	/pubmed/21850275	Davis FM, Kenny PA, Soo ET, van Denderen BJ, Thompson EW, Cabot PJ, Parat MO, Roberts-Thomson SJ, Monteith GR.	EGF, P2X(5)
																																												The H4 histamine receptor agonist, clobenpropit, suppresses human cholangiocarcinoma progression by disruption of epithelial mesenchymal transition and tumor metastasis.	/pubmed/21793031	Meng F, Han Y, Staloch D, Francis T, Stokes A, Francis H.	H4HR
																																												IL-8 signaling plays a critical role in the epithelial-mesenchymal transition of human carcinoma cells.	/pubmed/21653678	Fernando RI, Castillo MD, Litzinger M, Hamilton DH, Palena C.	IL-8
																																												Thrombin induces expression of twist and cell motility via the hypoxia-inducible factor-1Ô± translational pathway in colorectal cancer cells.	/pubmed/20857420	Chang LH, Chen CH, Huang DY, Pai HC, Pan SL, Teng CM.	PAR-1 and PAR-4
																																												ITF2 is a target of CXCR4 in MDA-MB-231 breast cancer cells and is associated with reduced survival in estrogen receptor-negative breast cancer.	/pubmed/20603605	Appaiah H, Bhat-Nakshatri P, Mehta R, Thorat M, Badve S, Nakshatri H.	CXCR4, ITF2, ID2
																																												CXCR4 mediated chemotaxis is regulated by 5T4 oncofetal glycoprotein in mouse embryonic cells.	/pubmed/20376365	Southgate TD, McGinn OJ, Castro FV, Rutkowski AJ, Al-Muftah M, Marinov G, Smethurst GJ, Shaw D, Ward CM, Miller CJ, Stern PL.	5T4, CXCR4, CD44
																																												Hypoxia stimulates CXCR4 signalling in ileal carcinoids.	/pubmed/20071457	Arvidsson Y, Bergstr’_m A, Arvidsson L, Kristiansson E, Ahlman H, Nilsson O.	VEGF, CXCR4, HIF-1alpha, HIF-2alpha
																																												Snail promotes CXCR2 ligand-dependent tumor progression in non-small cell lung carcinoma.	/pubmed/19887480	Yanagawa J, Walser TC, Zhu LX, Hong L, Fishbein MC, Mah V, Chia D, Goodglick L, Elashoff DA, Luo J, Magyar CE, Dohadwala M, Lee JM, St John MA, Strieter RM, Sharma S, Dubinett SM.	Snail , CXCR2
																																												Nodal lymphangiogenesis and metastasis: Role of tumor-induced lymphatic vessel activation in extramammary Paget's disease.	/pubmed/19815713	Hirakawa S, Detmar M, Kerjaschki D, Nagamatsu S, Matsuo K, Tanemura A, Kamata N, Higashikawa K, Okazaki H, Kameda K, Nishida-Fukuda H, Mori H, Hanakawa Y, Sayama K, Shirakata Y, Tohyama M, Tokumaru S, Katayama I, Hashimoto K.	SDF-1, CXCR4
																																												Analysis of Wnt/FZD-mediated signalling in a cell line model of colorectal cancer morphogenesis.	/pubmed/19099262	Vincan E, Whitehead RH, Faux MC.	Frizzled 7
																																												Calcitonin promotes in vivo metastasis of prostate cancer cells by altering cell signaling, adhesion, and inflammatory pathways.	/pubmed/18784182	Shah GV, Thomas S, Muralidharan A, Liu Y, Hermonat PL, Williams J, Chaudhary J.	CTR, CT
																																												The effect of transforming growth factor beta on human neuroendocrine tumor BON cell proliferation and differentiation is mediated through somatostatin signaling.	/pubmed/18567806	Leu FP, Nandi M, Niu C.	TGF, SST
																																												Up-regulation of stromal cell-derived factor-1alpha and its receptor CXCR4 expression accompanied with epithelial-mesenchymal transition in human oral squamous cell carcinoma.	/pubmed/18357387	Taki M, Higashikawa K, Yoneda S, Ono S, Shigeishi H, Nagayama M, Kamata N.	CXCR4, TGF-beta1, SDF-1alpha
																																												CXC chemokine receptor-4 antagonist blocks both growth of primary tumor and metastasis of head and neck cancer in xenograft mouse models.	/pubmed/17671223	Yoon Y, Liang Z, Zhang X, Choe M, Zhu A, Cho HT, Shin DM, Goodman MM, Chen ZG, Shim H.	CXCR4
																																												Epithelial-mesenchymal transition induced by the stromal cell-derived factor-1/CXCR4 system in oral squamous cell carcinoma cells.	/pubmed/17016644	Onoue T, Uchida D, Begum NM, Tomizuka Y, Yoshida H, Sato M.	SDF-1, CXCR4
																																												Frizzled-7 dictates three-dimensional organization of colorectal cancer cell carcinoids.	/pubmed/17016432	Vincan E, Darcy PK, Farrelly CA, Faux MC, Brabletz T, Ramsay RG.	FZD7
																																												Endothelin-1 is required during epithelial to mesenchymal transition in ovarian cancer progression.	/pubmed/16741062	Rosan’_ L, Spinella F, Di Castro V, Decandia S, Nicotra MR, Natali PG, Bagnato A.	ET-1
																																												Deletion of the COOH-terminal domain of CXC chemokine receptor 4 leads to the down-regulation of cell-to-cell contact, enhanced motility and proliferation in breast carcinoma cells.	/pubmed/16740704	Ueda Y, Neel NF, Schutyser E, Raman D, Richmond A.	CXCR4
																																												Integrin-linked kinase functions as a downstream mediator of endothelin-1 to promote invasive behavior in ovarian carcinoma.	/pubmed/16648553	Rosan’_ L, Spinella F, Di Castro V, Dedhar S, Nicotra MR, Natali PG, Bagnato A.	ILK, ET-1
																																												Endothelin-1 promotes epithelial-to-mesenchymal transition in human ovarian cancer cells.	/pubmed/16357176	Rosan’_ L, Spinella F, Di Castro V, Nicotra MR, Dedhar S, de Herreros AG, Natali PG, Bagnato A.	ET-1, GSK-3beta
																																												Gene expression in Wilms' tumor mimics the earliest committed stage in the metanephric mesenchymal-epithelial transition.	/pubmed/12057921	Li CM, Guo M, Borczuk A, Powell CA, Wei M, Thaker HM, Friedman R, Klein U, Tycko B.	SALL2 , SIX1, MOX1, PAX2, EYA1, HBF2, and HOXA11

































































































































[truncated: 28 more columns]

## Sheet: TGFb.MC
TGFb
Title	URL	Description	Gene(s)
MicroRNA-539 functions as a tumour suppressor in prostate cancer via the TGF-Ô_/Smad4 signalling pathway by down-regulating DLX1.	/pubmed/31298493	Sun B, Fan Y, Yang A, Liang L, Cao J.	miR-539, DLX1, E-cadherin, vimentin, Smad4, c-Myc, Snail1 and SLUG
TGFB1-induced autophagy affects the pattern of pancreatic cancer progression in distinct ways depending on SMAD4 status.	/pubmed/31177911	Liang C, Xu J, Meng Q, Zhang B, Liu J, Hua J, Zhang Y, Shi S, Yu X.	TGFB1, SMAD4, LC3B
Role of RUNX2 transcription factor in epithelial mesenchymal transition in non-small cell lung cancer lung cancer: Epigenetic control of the RUNX2 P1 promoter.	/pubmed/31109257	Herre’±o AM, Ram’_rez AC, Chaparro VP, Fernandez MJ, Ca’±as A, Morantes CF, Moreno OM, Brug’©s RE, Mej’_a JA, Bustos FJ, Montecino M, Rojas AP.	RUNX2/ p57, H3K27Ac, H3K4Me3, WDR5, MLL2, MLL4, UTX, RUNX2, VIMENTIN, TWIST1, and SNAIL1
Hyaluronic acid synthase 2 promotes malignant phenotypes of colorectal cancer cells through transforming growth factor beta signaling.	/pubmed/31102316	Kim YH, Lee SB, Shim S, Kim A, Park JH, Jang WS, Lee SJ, Myung JK, Park S, Lee SJ, Kim MJ.	Hyaluronic acid synthase 2 (HAS2), TGF-β, and SMAD2/Snail
Up-regulation of Insulin-like Growth Factor Binding Protein-3 Is Associated with Brain Metastasis in Lung Adenocarcinoma.	/pubmed/31085806	Yang L, Li J, Fu S, Ren P, Tang J, Wang N, Shi X, Wu J, Lin S.	insulin-like growth factor binding protein-3 (IGFBP3) , IGFBP3 ,
Upregulated MicroRNA-141 Suppresses Epithelial-Mesenchymal Transition and Lymph Node Metastasis via HOXC6-Dependent TGF-Ô_ Signaling Pathway in Laryngeal Cancer.	/pubmed/31017798	Sun DZ, Wang XH, Fu YG, Yang PZ, Lv HQ, Yin YW, Zhang XY.	microRNA-141 (miR-141), Homeobox C6 (HOXC6), transforming growth factor-β (TGF-β), HOXC6, vimentin, snail, MMP-2, MMP-9, E-cadherin
NDRG2 Regulates the Expression of Genes Involved in Epithelial Mesenchymal Transition of Prostate Cancer Cells.	/pubmed/30936598	Moradi Monfared M, Alizadeh Zarei M, Rafiei Dehbidi G, Behzad Behbahani A, Arabsolghar R, Takhshid MA.	N-myc downstream-regulated gene 2 (NDRG2), E-cadherin (E-CAD), α- and β-catenins, Slug and Snail, transforming growth factor (TGF)-α and -β, and vascular endothelial growth factor (VEGF).
Ginsenoside Rg3 Inhibits Migration and Invasion of Nasopharyngeal Carcinoma Cells and Suppresses Epithelial Mesenchymal Transition.	/pubmed/30915362	Wang D, Wu C, Liu D, Zhang L, Long G, Hu G, Sun W.	E-cadherin, Vimentin and N-cadherin, Transforming growth factor β- (TGF-β-), Zinc Finger E-Box Binding Homeobox 1 (ZEB1).
MiR-1246 Promotes Metastasis and Invasion of A549 cells by Targeting GSK-3Ô_Š—êMediated Wnt/Ô_-Catenin Pathway.	/pubmed/30913872	Yang F, Xiong H, Duan L, Li Q, Li X, Zhou Y.	miR-1246, E-cadherin, vimentin and transforming growth factor β (TGF-β), GSK-3β
Discovery of a natural small-molecule compound that suppresses tumor EMT, stemness and metastasis by inhibiting TGFÔ_/BMP signaling in triple-negative breast cancer.	/pubmed/30898152	Di L, Liu LJ, Yan YM, Fu R, Li Y, Xu Y, Cheng YX, Wu ZQ.	TGFβ) and BMP pathways
Overexpression of RNF38 facilitates TGF-Ô_ signaling by Ubiquitinating and degrading AHNAK in hepatocellular carcinoma.	/pubmed/30836988	Peng R, Zhang PF, Yang X, Wei CY, Huang XY, Cai JB, Lu JC, Gao C, Sun HX, Gao Q, Bai DS, Shi GM, Ke AW, Fan J.	RING finger protein 38 (RNF38), neuroblast differentiation-associated protein (AHNAK), transforming growth factor beta receptor 1 (TGFBR1)
LncRNA SNHG6 promotes proliferation, invasion and migration in colorectal cancer cells by activating TGF-Ô_/Smad signaling pathway via targeting UPF1 and inducing EMT via regulation of ZEB1.	/pubmed/30662328	Wang X, Lai Q, He J, Li Q, Ding J, Lan Z, Gu C, Yan Q, Fang Y, Zhao X, Liu S.	small nucleolar RNA host gene 6 (SNHG6), UPF1, ZEB1
TGFÔ_1-induced cell motility but not cell proliferation is mediated through Cten in colorectal cancer.	/pubmed/30648319	Asiri A, Raposo TP, Alfahed A, Ilyas M.	Cten (C-terminal tensin-like), TGF-β1, Snail, Rock, N-cadherin, Src
PRRX1 Regulates Cellular Phenotype Plasticity and Dormancy of Head and Neck Squamous Cell Carcinoma Through miR-642b-3p.	/pubmed/30622052	Jiang J, Zheng M, Zhang M, Yang X, Li L, Wang SS, Wu JS, Yu XH, Wu JB, Pang X, Tang YJ, Tang YL, Liang XH.	PRRX1, miR-642b-3p, TGF-β2 and p38
SIRT6 drives epithelial-to-mesenchymal transition and metastasis in non-small cell lung cancer via snail-dependent transrepression of KLF4.	/pubmed/30577808	Li Z, Huang J, Shen S, Ding Z, Luo Q, Chen Z, Lu S.	Sirtuin 6 (SIRT6), Snail, kruppel-like factor 4 (KLF4)
Effect of gap junction-mediated intercellular communication on TGF-Ô_Î¾induced epithelial-to-mesenchymal transition.	/pubmed/30545634	Fukuda S, Akiyama M, Harada H, Nakahama KI.	Cx43, TGF-β1, sm22α
Sphingomyelin synthase 1 regulates the epithelialŠ—•toŠ—•mesenchymal transition mediated by the TGFŠ—•Ô_/Smad pathway in MDAŠ—•MBŠ—•231 cells.	/pubmed/30535436	Liu S, Hou H, Zhang P, Wu Y, He X, Li H, Yan N.	sphingomyelin synthase 1 (SMS1), TGF‑β1, E‑cadherin, vimentin
TGF-Ô_1 promotes cell migration in hepatocellular carcinoma by suppressing reelin expression.	/pubmed/30447345	Luo Y, Huang K, Zheng J, Zhang J, Zhang L.	TGF-β1 and RELN
Lysyl oxidase-like 2 is a regulator of angiogenesis through modulation of endothelial-to-mesenchymal transition.	/pubmed/30387148	de Jong OG, van der Waals LM, Kools FRW, Verhaar MC, van Balkom BWM.	Lysyl oxidase-like 2 (LOXL2), protein kinase B (PKB)/Akt and focal adhesion kinase (FAK) signaling,
SPARC acts as a mediator of TGF-Ô_1 in promoting epithelial-to-mesenchymal transition in A549 and H1299 lung cancer cells.	/pubmed/30346081	Sun W, Feng J, Yi Q, Xu X, Chen Y, Tang L.	secreted protein acidic and rich in cysteine (SPARC), p-Akt and P-ERK
SNX6 predicts poor prognosis and contributes to the metastasis of pancreatic cancer cells via activating epithelial-mesenchymal transition.	/pubmed/30307473	Hu P, Liang Y, Hu Q, Wang H, Cai Z, He J, Cai J, Liu M, Qin Y, Yu X, Jiang C, Zhang B, Wang W.	sorting nexin 6 (SNX6),
Foxf2 plays a dual role during transforming growth factor beta-induced epithelial to mesenchymal transition by promoting apoptosis yet enabling cell junction dissolution and migration.	/pubmed/30285803	Meyer-Schaller N, Heck C, Tiede S, Yilmaz M, Christofori G.	Transcription factor forkhead box protein F2 (Foxf2), E-cadherin, Zeb1, Zeb2, Id2, miRNA 200 family members, Noxa, betacellulin and amphiregulin
Silibinin attenuates TGFŠ—•Ô_1Š—•induced migration and invasion via EMT suppression and is associated with COXŠ—•2 downregulation in bladder transitional cell carcinoma.	/pubmed/30272315	Li F, Sun Y, Jia J, Yang C, Tang X, Jin B, Wang K, Guo P, Ma Z, Chen Y, Wang X, Chang L, He D, Zeng J.	TGF‑β1, COX‑2
Circular RNA hsa_circ_0008305 (circPTK2) inhibits TGF-Ô_-induced epithelial-mesenchymal transition and metastasis by controlling TIF1Ô_ in non-small cell lung cancer.	/pubmed/30261900	Wang L, Tong X, Zhou Z, Wang S, Lei Z, Zhang T, Liu Z, Zeng Y, Li C, Zhao J, Su Z, Zhang C, Liu X, Xu G, Zhang HT.	Circular RNA hsa_circ_0008305 (circPTK2), TGF-β, transcriptional intermediary factor 1 γ (TIF1γ), miR-429/miR-200b-3p, Snail,
Ahnak promotes tumor metastasis through transforming growth factor-Ô_-mediated epithelial-mesenchymal transition.	/pubmed/30258109	Sohn M, Shin S, Yoo JY, Goh Y, Lee IH, Bae YS.	Ahnak, TGFβ, Smad3, N-cadherin
Bone morphogenetic protein and activin membrane-bound inhibitor suppress bone cancer progression in MG63 and SAOS cells via regulation of the TGF-Ô_-induced EMT signaling pathway.	/pubmed/30250579	Liu F, Wang K, Zhang L, Yang YL.	bone morphogenetic protein and activin membrane-bound inhibitor (BAMBI), P16, P21 and B-cell lymphoma 2,
miR-203 inhibits ovarian tumor metastasis by targeting BIRC5 and attenuating the TGFÔ_ pathway.	/pubmed/30241553	Wang B, Li X, Zhao G, Yan H, Dong P, Watari H, Sims M, Li W, Pfeffer LM, Guo Y, Yue J.	miR-203, BIRC5, TGFβ pathway
Inhibin B suppresses anoikis resistance and migration through the transforming growth factor-Ô_ signaling pathway in nasopharyngeal carcinoma.	/pubmed/30151927	Zou G, Ren B, Liu Y, Fu Y, Chen P, Li X, Luo S, He J, Gao G, Zeng Z, Xiong W, Li G, Huang Y, Xu K, Zhang W.	Inhibin B (INHBB), vimentin, matrix metallopeptidase-9, vascular endothelial growth factor A, E-cadherin
SOX4 can redirect TGF-Ô_-mediated SMAD3-transcriptional output in a context-dependent manner to promote tumorigenesis.	/pubmed/30137431	Vervoort SJ, Louren’_o AR, Tufegdzic Vidakovic A, Mocholi E, Sandoval JL, Rueda OM, Frederiks C, Pals C, Peeters JGC, Caldas C, Bruna A, Coffer PJ.	SMAD3, SOX4, TGF-β signaling,
Polyphyllin I inhibits growth and invasion of cisplatin-resistant gastric cancer cells by partially inhibiting CIP2A/PP2A/Akt signaling axis.	/pubmed/30119963	Zhang Y, Huang P, Liu X, Xiang Y, Zhang T, Wu Y, Xu J, Sun Z, Zhen W, Zhang L, Si Y, Liu Y.	cancerous inhibitor of protein phosphatase 2A (CIP2A), CIP2A/PP2A/Akt pathway
CTEN induces epithelial-mesenchymal transition (EMT) and metastasis in non small cell lung cancer cells.	/pubmed/29985912	Lu X, Gao J, Zhang Y, Zhao T, Cai H, Zhang T.	CTEN (COOH-terminus tensin-like molecule), TGF-β, mesenchymal markers, epithelial marker
MiRNA-34a reversed TGF-Ô_-induced epithelial-mesenchymal transition via suppression of SMAD4 in NPC cells.	/pubmed/29960168	Huang G, Du MY, Zhu H, Zhang N, Lu ZW, Qian LX, Zhang W, Tian X, He X, Yin L.	transforming growth factor-β (TGF-β), SMAD4, miRNA-34a,
PMLIV overexpression promotes TGF-Ô_-associated epithelial-mesenchymal transition and migration in MCF-7 cancer cells.	/pubmed/29943817	Liu Y, Wang JX, Huang D, Wang B, Li LL, Li XX, Ni P, Dong XL, Xia W, Yu CX, Xu WL, Chu WF, Zhao D.	Promyelocytic leukemia (PML) gene PMLIV, transforming growth factor-β (TGF-β) signaling, phospho-Smad2/3
Long non-coding RNAs AC026904.1 and UCA1: a "one-two punch" for TGF-Ô_-induced SNAI2 activation and epithelial-mesenchymal transition in breast cancer.	/pubmed/29774079	Li GY, Wang W, Sun JY, Xin B, Zhang X, Wang T, Zhang QF, Yao LB, Han H, Fan DM, Yang AG, Jia LT, Wang L.	Long non-coding RNAs AC026904.1, UCA1, TGF-β pathways,
MEGF6 Promotes the Epithelial-to-Mesenchymal Transition via the TGFÔ_/SMAD Signaling Pathway in Colorectal Cancer Metastasis.	/pubmed/29719292	Hu H, Wang M, Wang H, Liu Z, Guan X, Yang R, Huang R, Tang Q, Zou C, Wang G, Gao X, Wang X.	multiple epidermal growth factor-like domains protein 6 (MEGF6), slug in TGFβ)/SMAD signaling pathway.
DNA methyltransferase 3A isoform b contributes to repressing E-cadherin through cooperation of DNA methylation and H3K27/H3K9 methylation in EMT-related metastasis of gastric cancer.	/pubmed/29717263	Cui H, Hu Y, Guo D, Zhang A, Gu Y, Zhang S, Zhao C, Gong P, Shen X, Li Y, Wu H, Wang L, Zhao Z, Fan H.	DNMT3A isoform b (DNMT3Ab), E-cadherin, H3K9me2, H3K27me3, snail
Frizzled-8 integrates Wnt-11 and transforming growth factor-Ô_ signaling in prostate cancer.	/pubmed/29717114	Murillo-Garz’_n V, Gorro’±o-Etxebarria I, ’Äkerfelt M, Puustinen MC, Sistonen L, Nees M, Carton J, Waxman J, Kypta RM.	FZD8 , Wnt-11, TGF-β, TGFBR1, ATF2, TGF-β/Smad-dependent signaling.
A kinome-wide high-content siRNA screen identifies MEK5-ERK5 signaling as critical for breast cancer cell EMT and metastasis.	/pubmed/29713055	Pavan S, Meyer-Schaller N, Diepenbruck M, Kalathur RKR, Saxena M, Christofori G.	MEK5-ERK5 axis, TGFβ, EMEF2B
LncRNA ATB promotes proliferation and metastasis in A549 cells by down-regulation of microRNA-494.	/pubmed/29693289	Cao Y, Luo X, Ding X, Cui S, Guo C.	transforming growth factor-β (ATB) , miR-494 , AKT, JAK1, and STAT3,
Epithelial to mesenchymal transition induces stem cell like phenotype in renal cell carcinoma cells.	/pubmed/29681769	Singla M, Kumar A, Bal A, Sarkar S, Bhattacharyya S.	no genes
LTBP2 promotes the migration and invasion of gastric cancer cells and predicts poor outcome of patients with gastric cancer.	/pubmed/29620158	Wang J, Liang WJ, Min GT, Wang HP, Chen W, Yao N.	Latent transforming growth factor-β-binding protein (LTBP)2,
Downregulation of miR-3127-5p promotes epithelial-mesenchymal transition via FZD4 regulation of Wnt/Ô_-catenin signaling in non-small-cell lung cancer.	/pubmed/29566281	Yang Y, Sun Y, Wu Y, Tang D, Ding X, Xu W, Su B, Gao W.	miR-3127-5p, FZD4, Transforming growth factor-β1 (TGF-β1), Wnt/β-catenin signaling
Bioluminescence Imaging for Monitoring miR-200c Expression in Breast Cancer Cells and its Effects on Epithelial-Mesenchymal Transition Progress in Living Animals.	/pubmed/29532351	Liu J, Shen JX, He, Zhang GJ.	miR-200c,
TGFÔ_-induced epithelial-to-mesenchymal transition in prostate cancer cells is mediated via TRPM7 expression.	/pubmed/29500887	Sun Y, Schaar A, Sukumaran P, Dhasarathy A, Singh BB.	TRPM7, TGFβ,
Identification and validation a TGF-Ô_-associated long non-coding RNA of head and neck squamous cell carcinoma by bioinformatics method.	/pubmed/29490660	Huang T, Huang W, Lu H, Zhang BY, Ma J, Zhao D, Wang YJ, Yu DH, He X.	TGF-β, lncRNA - EPB41L4A-AS2,
Astragaloside IV inhibits TGF-Ô_1-induced epithelial-mesenchymal transition through inhibition of the PI3K/Akt/NF-Ô_B pathway in gastric cancer cells.	/pubmed/29480652	Zhu J, Wen K.	E-cadherin, N-cadherin, Vimentin, transforming growth factor β1 (TGF-β1), PI3K/Akt/NF-κB pathway
Paeoniflorin Inhibits Migration and Invasion of Human Glioblastoma Cells via Suppression Transforming Growth Factor Ô_-Induced Epithelial-Mesenchymal Transition.	/pubmed/29423667	Wang Z, Liu Z, Yu G, Nie X, Jia W, Liu RE, Xu R.	TGFβ pathway
PCDHGA9 acts as a tumor suppressor to induce tumor cell apoptosis and autophagy and inhibit the EMT process in human gastric cancer.	/pubmed/29348665	Weng J, Xiao J, Mi Y, Fang X, Sun Y, Li S, Qin Z, Li X, Liu T, Zhao S, Zhou L, Wen Y.	Protocadherin gamma subfamily A, 9 (PCDHGA9), Wnt/β-catenin pathway, TGF-β, Smad2/3.
Long non-coding RNA XIST promotes TGF-Ô_-induced epithelial-mesenchymal transition by regulating miR-367/141-ZEB2 axis in non-small-cell lung cancer.	/pubmed/29339211	Li C, Wan L, Liu Z, Xu G, Wang S, Su Z, Zhang Y, Zhang C, Liu X, Lei Z, Zhang HT.	lncRNA XIST, ZEB2, TGF-β, miR-367 and miR-141
Inhibition of Epithelial-Mesenchymal Transition and Tissue Regeneration by Waterborne Titanium Dioxide Nanoparticles.	/pubmed/29318884	Li X, Song L, Hu X, Liu C, Shi J, Wang H, Zhan L, Song H.	TGFβ signaling
FAD104, a regulator of adipogenesis, is a novel suppressor of TGF-Ô_-mediated EMT in cervical cancer cells.	/pubmed/29180690	Goto M, Osada S, Imagawa M, Nishizuka M.	fad104, TGF-β, Smad2, Smad3, Smad1/5/8
Targeting of NT5E by miR-30b and miR-340 attenuates proliferation, invasion and migration of gallbladder carcinoma.	/pubmed/29155108	Wang N, Xiang X, Chen K, Liu P, Zhu A.	miR-30b, miR-340, ecto-5'-nucleotidase (NT5E), NT5E
HMGA2 facilitates epithelial-mesenchymal transition in renal cell carcinoma by regulating the TGF-Ô_/Smad2 signaling pathway.	/pubmed/29138866	Kou B, Liu W, Tang X, Kou Q.	High-mobility group AT-hook 2 (HMGA2), E‑cadherin, N‑cadherin, Twist1, Twist2, TGF-β and Smad2
Sox5 contributes to prostate cancer metastasis and is a master regulator of TGF-Ô_-induced epithelial mesenchymal transition through controlling Twist1 expression.	/pubmed/29123266	Hu J, Tian J, Zhu S, Sun L, Yu J, Tian H, Dong Q, Luo Q, Jiang N, Niu Y, Shang Z.	TGF-β, Sox5, Smad3
Transforming growth factor Ô_1 promotes migration and invasion in HepG2 cells: EpithelialŠ—•toŠ—•mesenchymal transition via JAK/STAT3 signaling.	/pubmed/29115395	Lin XL, Liu M, Liu Y, Hu H, Pan Y, Zou W, Fan X, Hu X.	TGFβ1 , Twist, JAK/STAT3 signaling pathway
E26 Transformation-Specific Transcription Factor ETS2 as an Oncogene Promotes the Progression of Hypopharyngeal Cancer.	/pubmed/29111780	Liu X, Zhang C, Zhang Z, Zhang Z, Ji W, Cao S, Cai X, Lei D, Pan X.	ETS factor - ETS2, TGF-β, E-cadherin, zona occludens protein-1, vimentin, α-sooth muscle actin, MAPK/p38/ERK/JNK signaling
Role of AP-2Ô± and MAPK7 in the regulation of autocrine TGF-Ô_/miR-200b signals to maintain epithelial-mesenchymal transition in cholangiocarcinoma.	/pubmed/29084594	Zhang D, Li H, Jiang X, Cao L, Wen Z, Yang X, Xue P.	miR-200b, TFAP2A (encode AP-2α), MAPK7, AP-2α, TGFB1, cyclin D1, and Cdk2
miR-1199-5p and Zeb1 function in a double-negative feedback loop potentially coordinating EMT and tumour metastasis.	/pubmed/29079737	Diepenbruck M, Tiede S, Saxena M, Ivanek R, Kalathur RKR, L’_’_nd F, Meyer-Schaller N, Christofori G.	miR-1199-5p, Zeb1
SHCBP1 promotes synovial sarcoma cell metastasis via targeting TGF-Ô_1/Smad signaling pathway and is associated with poor prognosis.	/pubmed/29020987	Peng C, Zhao H, Song Y, Chen W, Wang X, Liu X, Zhang C, Zhao J, Li J, Cheng G, Wu D, Gao C, Wang X.	SHC SH2-domain binding protein 1 (SHCBP1), TGF-β1
Establishment of twist-1 and TGFBR2 as direct targets of microRNA-20a in mesenchymal to epithelial transition of breast cancer cell-line MDA-MB-231.	/pubmed/28987542	De S, Das S, Mukherjee S, Das S, Sengupta Bandyopadhyay S.	microRNA-20a, twist-1, TGFBR2, E-cadherin, claudin, N-cadherin, fibronectin
FUT8 promotes breast cancer cell invasiveness by remodeling TGF-Ô_ receptor core fucosylation.	/pubmed/28982386	Tu CF, Wu MY, Lin YC, Kannagi R, Yang RB.	fucosyltransferase 8 (FUT8), TGF-β and receptor complex
Activin B Regulates Adhesion, Invasiveness, and Migratory Activities in Oral Cancer: a Potential Biomarker for Metastasis.	/pubmed/28819404	Kita A, Kasamatsu A, Nakashima D, Endo-Sakamoto Y, Ishida S, Shimizu T, Kimura Y, Miyamoto I, Yoshimura S, Shiiba M, Tanzawa H, Uzawa K.	Activin B, inhibin beta b (INHBB), EMT-related genes
Loss of SPDEF and gain of TGFBI activity after androgen deprivation therapy promote EMT and bone metastasis of prostate cancer.	/pubmed/28811384	Chen WY, Tsai YC, Yeh HL, Suau F, Jiang KC, Shao AN, Huang J, Liu YN.	AR (androgen receptor), SPDEF, TGFBI (type 1, 2, and 4 collagen-binding protein transforming growth factor-β (TGFβ)-induced protein),
Role of IQGAP3 in metastasis and epithelial-mesenchymal transition in human hepatocellular carcinoma.	/pubmed/28810875	Shi Y, Qin N, Zhou Q, Chen Y, Huang S, Chen B, Shen G, Jia H.	IQGAP3
TGF-Ô_1 Causes EMT by Regulating N-Acetyl Glucosaminyl Transferases via Downregulation of Non Muscle Myosin II-A through JNK/P38/PI3K Pathway in Lung Cancer.	/pubmed/28782471	Khan GJ, Gao Y, Gu M, Wang L, Khan S, Naeem F, Semukunzi H, Roy D, Yuan S, Sun L.	TGF-β1, NMII-A, C2GnT-M (Core 2 N-acetyl Glucosaminyl Transferase mucin type), N-acetylglucosaminyltransferase (GnT) -V and -III
NHERF1 Suppresses Lung Cancer Cell Migration by Regulation of Epithelial-Mesenchymal Transition.	/pubmed/28739734	Yang F, Gu Y, Zhao Z, Huang J, Jiang WG, Cheng S.	TGF-β1, NHERF1, E-cadherin, N-cadherin, snail family transcriptional repressor 1 (SNAI1) and snail family transcriptional repressor 2 (SLUG)
Piperlongumine inhibits TGF-Ô_-induced epithelial-to-mesenchymal transition by modulating the expression of E-cadherin, Snail1, and Twist1.	/pubmed/28734931	Park MJ, Lee DE, Shim MK, Jang EH, Lee JK, Jeong SY, Kim JH.	TGF-β, E-cadherin, Snail1, and Twist1.
cPLA2Ô± activates PI3K/AKT and inhibits Smad2/3 during epithelial-mesenchymal transition of hepatocellular carcinoma cells.	/pubmed/28649002	Fu H, He Y, Qi L, Chen L, Luo Y, Chen L, Li Y, Zhang N, Guo H.	cPLA2α (Cytosolic phospholipase A2α), Smad2/3, PI3K/AKT/ERK, EGF- and TGF-β- pathways
MicroRNAs-143 and -145 induce epithelial to mesenchymal transition and modulate the expression of junction proteins.	/pubmed/28644441	Avalle L, Incarnato D, Savino A, Gai M, Marino F, Pensa S, Barbieri I, Stadler MB, Provero P, Oliviero S, Poli V.	miRs-143 and -145, several tight junction proteins, TGIF (SMAD co-repressor), TGF-β, SMAD
MicroRNA-26a and -26b inhibit lens fibrosis and cataract by negatively regulating Jagged-1/Notch signaling pathway.	/pubmed/28622289	Chen X, Xiao W, Chen W, Liu X, Wu M, Bo Q, Luo Y, Ye S, Cao Y, Liu Y.	microRNA (miR)-26a and miR-26b, Jagged-1, Jagged-1/Notch signaling, TGFβ2
Ring finger protein 125, as a potential highly aggressive and unfavorable prognostic biomarker, promotes the invasion and metastasis of human gallbladder cancers via activating the TGF- Ô_1-SMAD3-ID1 signaling pathway.	/pubmed/28611292	Liu ZY, Cao J, Zhang JT, Xu GL, Li XP, Wang FT, Ansari KH, Mohamed H, Fan YZ.	RNF125 (ring finger protein 125), E-cadherin, β-catenin, vimentin and N-cadherin, TGF-β1-SMAD3-ID1 signaling
MicroRNA-199b-5p attenuates TGF-Ô_1-induced epithelial-mesenchymal transition in hepatocellular carcinoma.	/pubmed/28588321	Zhou SJ, Liu FY, Zhang AH, Liang HF, Wang Y, Ma R, Jiang YH, Sun NF.	miR-199b-5p, N-cadherin, TGF-β1, Akt phosphorylation, PI3K/Akt pathway
SENP2 suppresses epithelial-mesenchymal transition of bladder cancer cells through deSUMOylation of TGF-Ô_RI.	/pubmed/28574613	Tan M, Zhang D, Zhang E, Xu D, Liu Z, Qiu J, Fan Y, Shen B.	SENP2 (SUMO-specific protease 2), E-cadherin, N-cadherin, fibronectin, TGF-β, TGF-βRI (TGFβ receptor I)
HGF induces EMT in non-small-cell lung cancer through the hBVR pathway.	/pubmed/28554854	Liu F, Song S, Yi Z, Zhang M, Li J, Yang F, Yin H, Yu X, Guan C, Liu Y, Liu Z, Wang J, Zhu D.	Hepatocyte growth factor (HGF), human biliverdin reductase (hBVR)
The inhibitor of differentiation-1 (Id1) enables lung cancer liver colonization through activation of an EMT program in tumor cells and establishment of the pre-metastatic niche.	/pubmed/28549790	Casta’±’_n E, Soltermann A, L’_pez I, Rom’n M, Ecay M, Collantes M, Redrado M, Baraibar I, L’_pez-Picazo JM, Rolfo C, Vidal-Vanaclocha F, Raez L, Weder W, Calvo A, Gil-Bazo I.	differentiation-1 (Id1), vimentin, integrinβ1, TGFβ1 and snail,
Hypoxia and TGF-Ô_1 induced PLOD2 expression improve the migration and invasion of cervical cancer cells by promoting epithelial-to-mesenchymal transition (EMT) and focal adhesion formation.	/pubmed/28507454	Xu F, Zhang J, Hu G, Liu L, Liang W.	TGF-β1, PLOD2,
miR-551b regulates epithelial-mesenchymal transition and metastasis of gastric cancer by inhibiting ERBB4 expression.	/pubmed/28501849	Song G, Zhang H, Chen C, Gong L, Chen B, Zhao S, Shi J, Xu J, Ye Z.	miR-551b, ERBB4, TGF-β1, E-Cadherin, N-Cadherin, Vimentin,
RCCD1 depletion attenuates TGF-Ô_-induced EMT and cell migration byÎ¾stabilizing cytoskeletal microtubules in NSCLC cells.	/pubmed/28455245	Wu J, He Z, Yang XM, Li KL, Wang DL, Sun FL.	RCC1 domain-containing protein 1 (RCCD1), JMJD5, TGF-β, Occludin, Vimentin and Snail
USP22 drives colorectal cancer invasion and metastasis via epithelial-mesenchymal transition by activating AP4.	/pubmed/28427243	Li Y, Yang Y, Li J, Liu H, Chen F, Li B, Cui B, Liu Y.	Ubiquitin specific peptidase 22 (USP22), AP4
SUMO-Specific Cysteine Protease 1 Promotes Epithelial Mesenchymal Transition of Prostate Cancer Cells via Regulating SMAD4 deSUMOylation.	/pubmed/28417919	Zhang X, Wang H, Wang H, Xiao F, Seth P, Xu W, Jia Q, Wu C, Yang Y, Wang L.	small ubiquitin-like modifier (SUMO)-specific cysteine protease 1 (SENP1), SMAD4, E-cadherin, Vimentin,
NUSAP1 promotes invasion and metastasis of prostate cancer.	/pubmed/28404898	Gordon CA, Gong X, Ganesh D, Brooks JD.	nucleolar and spindle associated protein 1 (NUSAP1), 101 member B (FAM101B), TGFβ1
Gambogic acid suppresses cancer invasion and migration by inhibiting TGFÔ_1-induced epithelial-to-mesenchymal transition.	/pubmed/28404892	Zhao K, Zhang S, Song X, Yao Y, Zhou Y, You Q, Guo Q, Lu N.	TGFβ1, E-cadherin, N-cadherin, vimentin, TWIST1, NF-κB p65, NF-κB (IκBα) and IκBα kinase (IKKα)
MicroRNA-10b mediates TGF-Ô_1-regulated glioblastoma proliferation, migration and epithelial-mesenchymal transition.	/pubmed/28393237	Ma C, Wei F, Xia H, Liu H, Dong X, Zhang Y, Luo Q, Liu Y, Li Y.	miR-10b, TGF-β1, E-cadherin, apoptotic protease activating factor 1 (Apaf-1) and phosphatase and tensin homolog (PTEN)
The mechanism of epithelial-mesenchymal transition induced by TGF-Ô_1 in neuroblastoma cells.	/pubmed/28393230	Shao JB, Gao ZM, Huang WY, Lu ZB.	E-cadherin, α-SMA, TGF-β1, glioblastoma transcription factor (Gli) Gli1/2
cPLA2Ô± mediates TGF-Ô_-induced epithelial-mesenchymal transition in breast cancer through PI3k/Akt signaling.	/pubmed/28383549	Chen L, Fu H, Luo Y, Chen L, Cheng R, Zhang N, Guo H.	Cytosolic phospholipase A2α (cPLA2α), TGF-β, PI3K/Akt signaling pathway.
HR+HER2- breast cancers with growth factor receptor-mediated EMT have a poor prognosis and lapatinib downregulates EMT in MCF-7 cells.	/pubmed/28349782	Desai K, Aiyappa R, Prabhu JS, Nair MG, Lawrence PV, Korlimarla A, Ce A, Alexander A, Kaluve RS, Manjunath S, Correa M, Srinath BS, Patil S, Kalamdani A, Prasad M, Sridhar TS.	transforming growth factor beta 1, SNAI1 and SNAI2, vimentin, integrin β6, E-cadherin, matrix metalloproteinase 9 (MMP9)
Nobiletin inhibits invasion via inhibiting AKT/GSK3Ô_/Ô_-catenin signaling pathway in Slug-expressing glioma cells.	/pubmed/28339056	Zhang X, Zheng K, Li C, Zhao Y, Li H, Liu X, Long Y, Yao J.	E-cadherin and occludin, N-cadherin, fibronectin, Slug, TGF-β, AKT/GSK3β/β-catenin signaling
Silencing Trim59 inhibits invasion/migration and epithelial-to-mesenchymal transition via TGF-Ô_/Smad2/3 signaling pathway in bladder cancer cells.	/pubmed/28331343	Chen W, Zhao K, Miao C, Xu A, Zhang J, Zhu J, Su S, Wang Z.	Trim59, TGF-β/Smad2/3 signaling pathway
Bapx1 mediates transforming growth factor-Ô_- induced epithelial-mesenchymal transition and promotes a malignancy phenotype of gastric cancer cells.	/pubmed/28315334	Ouyang S, Zhu G, Ouyang L, Luo Y, Zhou R, Pan C, Bin J, Liao Y, Liao W.	Bapx1, transforming growth factor-β
High FMNL3 expression promotes nasopharyngeal carcinoma cell metastasis: role in TGF-Ô_1-induced epithelia-to-mesenchymal transition.	/pubmed/28198387	Wu Y, Shen Z, Wang K, Ha Y, Lei H, Jia Y, Ding R, Wu D, Gan S, Li R, Luo B, Jiang H, Jie W.	Formin-like 3 (FMNL3), Vimentin, E-cadherin, TGF-β1
MicroRNA-381 inhibits the metastasis of gastric cancer by targeting TMEM16A expression.	/pubmed/28193228	Cao Q, Liu F, Ji K, Liu N, He Y, Zhang W, Wang L.	MicroRNA-381, TMEM16A
NR2F2 inhibits Smad7 expression and promotes TGF-Ô_-dependent epithelial-mesenchymal transition of CRC via transactivation of miR-21.	/pubmed/28192117	Wang H, Nie L, Wu L, Liu Q, Guo X.	NR2F2, Smad7, TGF-β, miR-21.
Chimaphilin inhibits human osteosarcoma cell invasion and metastasis through suppressing the TGF-Ô_1-induced epithelial-to-mesenchymal transition markers via PI-3K/Akt, ERK1/2, and Smad signaling pathways.	/pubmed/28177668	Dong F, Liu T, Jin H, Wang W.	TGF-β1, PI-3K/Akt, ERK1/2, Smad2/3, E-cadherin, vimentin, Snail1 and Slug
Antimetastatic effects of norcantharidin on hepatocellular carcinoma cells by up-regulating FAM46C expression.	/pubmed/28123642	Wan XY, Zhai XF, Jiang YP, Han T, Zhang QY, Xin HL.	FAM46C, transforming growth factor-β (TGF-β), Smad
Long noncoding RNA LINC01186, regulated by TGF-Ô_/SMAD3, inhibits migration and invasion through Epithelial-Mesenchymal-Transition in lung cancer.	/pubmed/28119085	Hao Y, Yang X, Zhang D, Luo J, Chen R.	LINC01186, TGF-β, SMAD3
The neuropilin 2 isoform NRP2b uniquely supports TGFÔ_-mediated progression in lung cancer.	/pubmed/28096505	Gemmill RM, Nasarre P, Nair-Menon J, Cappuzzo F, Landi L, D'Incecco A, Uramoto H, Yoshida T, Haura EB, Armeson K, Drabkin HA.	Neuropilin 2 (NRP2), TGFβ, Akt, PD-L1, EGFR
The microRNA-449 family inhibits TGF-b_-mediated liver cancer cell migration by targeting SOX4.	/pubmed/28088579	Sandbothe M, Buurman R, Reich N, Greiwe L, Vajen B, G’_rlevik E, Sch’_ffer V, Eilers M, K’_hnel F, Vaquero A, Longerich T, Roessler S, Schirmacher P, Manns MP, Illig T, Schlegelberger B, Skawran B.	microRNA-449, TGF-β, SOX4
TGFb_1-Induced LncRNA UCA1 Upregulation Promotes Gastric Cancer Invasion and Migration.	/pubmed/28075173	Zuo ZK, Gong Y, Chen XH, Ye F, Yin ZM, Gong QN, Huang JS.	long noncoding RNA urothelial carcinoma associated 1 (UCA1), TGFβ1, vimentin, snail, E-cadherin, zonula occludens-1
Fuling Granule, a Traditional Chinese Medicine Compound, Suppresses Cell Proliferation and TGFb_-Induced EMT in Ovarian Cancer.	/pubmed/28036353	Tao F, Ruan S, Liu W, Wang L, Xiong Y, Shen M.	AKT/GSK-3β, TGFβ
Transforming growth factor-b_1 suppresses bone morphogenetic protein-2-induced mesenchymal-epithelial transition in HSC-4 human oral squamous cell carcinoma cells via Smad1/5/9 pathway suppression.	/pubmed/28035402	Chiba T, Ishisaki A, Kyakumoto S, Shibata T, Yamada H, Kamo M.	Transforming growth factor-β1, bone morphogenetic protein-2, Smad1/5/9
PEG10 is imperative for TGF-b_1-induced epithelialŠ—•mesenchymal transition in hepatocellular carcinoma.	/pubmed/28004118	Zhang M, Sui C, Dai B, Shen W, Lu J, Yang J.	PEG10, TGF-β1
Gankyrin promotes epithelial-mesenchymal transition and metastasis in NSCLC through forming a closed circle with IL-6/ STAT3 and TGF-Ô_/SMAD3 signaling pathway.	/pubmed/27992365	Wang WP, Sun Y, Lu Q, Zhao JB, Wang XJ, Chen Z, Ni YF, Wang JZ, Han Y, Zhang ZP, Yan XL, Li XF.	Gankyrin, IL-6, STAT3, TGF-β, SMAD3, E-cadherin, Vimentin, Twist1
WIP promotes in-vitro invasion ability, anchorage independent growth and EMT progression of A549 lung adenocarcinoma cells by regulating RhoA levels.	/pubmed/27939884	Salvi A, Thanabalu T.	WASP interacting protein (WIP), TGF-β1, RhoA
Gamma secretase inhibitor impairs epithelial-to-mesenchymal transition induced by TGF-Ô_ in ovarian tumor cell lines.	/pubmed/27908834	Pazos MC, Abramovich D, Bechis A, Accialini P, Parborell F, Tesone M, Irusta G.	TGF-β, γ-secretase, cadherin, Snail, Slug, Twist, Zeb1, phospho-β-catenin, Hes1 and Hey1
Direct regulation of FOXK1 by C-jun promotes proliferation, invasion and metastasis in gastric cancer cells.	/pubmed/27882939	Peng Y, Zhang P, Huang X, Yan Q, Wu M, Xie R, Wu Y, Zhang M, Nan Q, Zhao J, Li A, Xiong J, Ren Y, Bai Y, Chen Y, Liu S, Wang J.	Forkhead box (FOX) K1, c-jun, transforming growth factor-β1 (TGF-β1), vimentin, E-cadherin
Long noncoding RNA BX357664 regulates cell proliferation and epithelial-to-mesenchymal transition via inhibition of TGF-Ô_1/p38/HSP27 signaling in renal cell carcinoma.	/pubmed/27806310	Liu Y, Qian J, Li X, Chen W, Xu A, Zhao K, Hua Y, Huang Z, Zhang J, Liang C, Su S, Li P, Shao P, Li J, Qin C, Wang Z.	Long noncoding RNA BX357664, TGF-β1, p38, HSP27
Ginkgolic Acid Inhibits Invasion and Migration and TGF-Ô_-Induced EMT of Lung Cancer Cells Through PI3K/Akt/mTOR Inactivation.	/pubmed/27177359	Baek SH, Ko JH, Lee JH, Kim C, Lee H, Nam D, Lee J, Lee SG, Yang WM, Um JY, Sethi G, Ahn KS.	TGF-β, PI3K, Akt, mTOR, Fibronectin, Vimentin, N-cadherin, MMP-9, MMP-2, Twist, Snail, Fibronectin, Vimentin, N-cadherin
Disrupting MALAT1/miR-200c sponge decreases invasion and migration in endometrioid endometrial carcinoma.	/pubmed/27693631	Li Q, Zhang C, Chen R, Xiong H, Qiu F, Liu S, Zhang M, Wang F, Wang Y, Zhou X, Xiao G, Wang X, Jiang Q.	MALAT1/miR-200c,
Overexpression of LncRNA-ROR predicts a poor outcome in gallbladder cancer patients and promotes the tumor cells proliferation, migration, and invasion.	/pubmed/27449039	Wang SH, Zhang MD, Wu XC, Weng MZ, Zhou D, Quan ZW.	LncRNA-ROR,
Angiogenin elevates the invasive potential of squamous cell lung carcinoma cells through epithelialŠ—•mesenchymal transition.	/pubmed/27667357	Xu L, Yan Y, Xue X, Li CG, Xu ZY, Chen HZ.	angiogenin (ANG) , E-cadherin, vimentin, N-cadherin, β-catenin and TGF-β1
Effect of PPM1H on malignant phenotype of human pancreatic cancer cells.	/pubmed/27599670	Zhu H, Qin H, Li DM, Liu J, Zhao Q.	phosphatase 1H (PPM1H), TGF-β1, BMP2, E-cadherin, vimentin,
Metformin inhibits the radiation-induced invasive phenotype of esophageal squamous cell carcinoma.	/pubmed/27599468	Nakayama A, Ninomiya I, Harada S, Tsukada T, Okamoto K, Nakanuma S, Sakai S, Makino I, Kinoshita J, Hayashi H, Oyama K, Miyashita T, Tajima H, Takamura H, Fushida S, Ohta T.	vimentin, N-cadherin, Slug, Snail, and Twist, matrix metalloproteinases, hypoxia-related factor-1α, TGF-β, Smad2, Smad3, AMP-activated protein kinase
DcR3 induces epithelial-mesenchymal transition through activation of the TGF-Ô_3/SMAD signaling pathway in CRC.	/pubmed/27764793	Liu YP, Zhu HF, Liu DL, Hu ZY, Li SN, Kan HP, Wang XY, Li ZG.	Decoy receptor 3 (DcR3), TGF-β3, SMAD,
MicroRNA-132/212 Upregulation Inhibits TGF-Ô_-Mediated Epithelial-Mesenchymal Transition of Prostate Cancer Cells by Targeting SOX4.	/pubmed/27527117	Fu W, Tao T, Qi M, Wang L, Hu J, Li X, Xing N, Du R, Han B.	MicroRNA-132/212, TGF-β, SOX4
Role of BCL9L in transforming growth factor-Ô_ (TGF-Ô_)-induced epithelial-to-mesenchymal-transition (EMT) and metastasis of pancreatic cancer.	/pubmed/27713160	Sannino G, Armbruster N, Bodenh’_fer M, Haerle U, Behrens D, Buchholz M, Rothbauer U, Sipos B, Schmees C.	BCL9L, TGF-β, E-cadherin, β-catenin
MALAT1 Long Non-coding RNA Expression in Thyroid Tissues: Analysis by In Situ Hybridization and Real-Time PCR.	/pubmed/27696303	Zhang R, Hardin H, Huang W, Chen J, Asioli S, Righi A, Maletta F, Sapino A, Lloyd RV.	MALAT1 Long Non-coding RNA
MiR-429 is linked to metastasis and poor prognosis in renal cell carcinoma by affecting epithelial-mesenchymal transition.	/pubmed/27619681	Machackova T, Mlcochova H, Stanik M, Dolezel J, Fedorko M, Pacik D, Poprach A, Svoboda M, Slaby O.	miR-429, TGF-β, E-cadherin
An Enzyme- and Serum-free Neural Stem Cell Culture Model for EMT Investigation Suited for Drug Discovery.	/pubmed/27583933	Sailer MH, Sarvepalli D, Br’©g’åre C, Fisch U, Guentchev M, Weller M, Guzman R, Bettler B, Ghosh A, Hutter G.	Olig2, Sox10, Zeb1, Zeb2, Twist2, TGFβ, FGF, BMP
Estrogen-related receptor Ô± participates transforming growth factor-Ô_ (TGF-Ô_) induced epithelial-mesenchymal transition of osteosarcoma cells.	/pubmed/27532429	Chen Y, Zhang K, Li Y, He Q.	E-cadherin, Vimentin, TGF-β, Snail, estrogen-related receptors α (ERRα),
Mesenchymal stem cells enhance the metastasis of 3D-cultured hepatocellular carcinoma cells.	/pubmed/27475525	Liu C, Liu Y, Xu XX, Guo X, Sun GW, Ma XJ.	MMP-2, TGF-β receptor
Smad2/3/4 Pathway Contributes to TGF-Ô_-Induced MiRNA-181b Expression to Promote Gastric Cancer Metastasis by Targeting Timp3.	/pubmed/27383203	Zhou Q, Zheng X, Chen L, Xu B, Yang X, Jiang J, Wu C.	Smad2/3/4, TGF-β, MiRNA-181b , Timp3.
Atorvastatin partially inhibits the epithelial-mesenchymal transition in A549 cells induced by TGF-Ô_1 by attenuating the upregulation of SphK1.	/pubmed/27349500	Fan Z, Jiang H, Wang Z, Qu J.	TGF-β1, SphK1, ZEB1, TGF-β1
Synergistic effects of CD44 and TGF-Ô_1 through AKT/GSK-3Ô_/Ô_-catenin signaling during epithelial-mesenchymal transition in liver cancer cells.	/pubmed/27320862	Park NR, Cha JH, Jang JW, Bae SH, Jang B, Kim JH, Hur W, Choi JY, Yoon SK.	CD44, TGF-β1 , AKT/GSK-3β/β-catenin
Onco-miR-130 promotes cell proliferation and migration by targeting TGFÔ_R2 in gastric cancer.	/pubmed/27304191	Duan J, Zhang H, Qu Y, Deng T, Huang D, Liu R, Zhang L, Bai M, Zhou L, Ying G, Ba Y.	Onco-miR-130, TGFβR2
A Positive TGF-Ô_/c-KIT Feedback Loop Drives Tumor Progression in Advanced Primary Liver Cancer.	/pubmed/27292026	Rojas A, Zhang P, Wang Y, Foo WC, Mu’±oz NM, Xiao L, Wang J, Gores GJ, Hung MC, Blechacz B.	TGF-β, c-KIT, SMAD2, JAK1/STAT3
Repression of Smad4 by miRŠ—•205 moderates TGF-Ô_-induced epithelial-mesenchymal transition in A549 cell lines.	/pubmed/27279345	Zeng Y, Zhu J, Shen D, Qin H, Lei Z, Li W, Huang JA, Liu Z.	Smad4, miR‑205, TGF-β
The Nuclear Receptor, RORÔ_, Regulates Pathways Necessary for Breast Cancer Metastasis.	/pubmed/27211549	Oh TG, Wang SM, Acharya BR, Goode JM, Graham JD, Clarke CL, Yap AS, Muscat GEO.	RORγ, TGF-β, non-coding RNA, LINC00511
Downregulation of the TGFÔ_ Pseudoreceptor BAMBI in Non-Small Cell Lung Cancer Enhances TGFÔ_ Signaling and Invasion.	/pubmed/27197161	Marwitz S, Depner S, Dvornikov D, Merkle R, Szczygieä M, M’_ller-Decker K, Lucarelli P, W’_sch M, Mairb’_url H, Rabe KF, Kugler C, Vollmer E, Reck M, Scheufele S, Kr’_ger M, Ammerpohl O, Siebert R, Goldmann T, Klingm’_ller U.	TGFβ Pseudoreceptor BAMBI, TGFβ,
Chidamide alleviates TGF-Ô_-induced epithelial-mesenchymal transition in lung cancer cell lines.	/pubmed/27188428	Lin SH, Wang BY, Lin CH, Chien PJ, Wu YF, Ko JL, Chen JJ.	TGF-β, SMAD2, E-cadherin
Overexpression of SASH1 Inhibits TGF-Ô_1-Induced EMT in Gastric Cancer Cells.	/pubmed/27178818	Zong W, Yu C, Wang P, Dong L.	SAM- and SH3-domain containing 1 (SASH1), TGF-β1, PI3K, Akt
FCN2 inhibits epithelial-mesenchymal transition-induced metastasis of hepatocellular carcinoma via TGF-Ô_/Smad signaling.	/pubmed/27177473	Yang G, Liang Y, Zheng T, Song R, Wang J, Shi H, Sun B, Xie C, Li Y, Han J, Pan S, Lan Y, Liu X, Zhu M, Wang Y, Liu L.	Ficolin-2 (FCN2), TGF-β
MiR-487a Promotes TGF-Ô_1-induced EMT, the Migration and Invasion of Breast Cancer Cells by Directly Targeting MAGI2.	/pubmed/27019625	Ma M, He M, Jiang Q, Yan Y, Guan S, Zhang J, Yu Z, Chen Q, Sun M, Yao W, Zhao H, Jin F, Wei M.	MiR-487a, TGF-β1, MAGI2, vimentin, E-cadherin, PTEN, p-AKT , NF-kappaB (p65)
MiR-206 suppresses epithelial mesenchymal transition by targeting TGF-Ô_ signaling in estrogen receptor positive breast cancer cells.	/pubmed/27014911	Yin K, Yin W, Wang Y, Zhou L, Liu Y, Yang G, Wang J, Lu J.	miR-206, TGF-β, neuropilin-1 (NRP1), SMAD2,
Nobiletin inhibits epithelial-mesenchymal transition of human non-small cell lung cancer cells by antagonizing the TGF-Ô_1/Smad3 signaling pathway.	/pubmed/26986176	Da C, Liu Y, Zhan Y, Liu K, Wang R.	TGF-β1, MMP-2, MMP-9, p-Src, p-FAK, p-paxillin, Snail, Slug, Twist, ZEB1, Smad3
Bufalin suppresses hepatocellular carcinoma invasion and metastasis by targeting HIF-1Ô± via the PI3K/AKT/mTOR pathway.	/pubmed/26958938	Wang H, Zhang C, Xu L, Zang K, Ning Z, Jiang F, Chi H, Zhu X, Meng Z.	HIF-1α, PI3K/AKT/mTOR, E-cadherin, N-cadherin, vimentin, Snail.
Metformin attenuates transforming growth factor beta (TGF-Ô_) mediated oncogenesis in mesenchymal stem-like/claudin-low triple negative breast cancer.	/pubmed/26919310	Wahdan-Alaswad R, Harrell JC, Fan Z, Edgerton SM, Liu B, Thor AD.	TGF-β, Smad2, Smad3, ID1, ID3
Decreased expression of the type III TGF-Ô_ receptor enhances metastasis and invasion in hepatocellullar carcinoma progression.	/pubmed/26882862	Zhang S, Sun WY, Wu JJ, Gu YJ, Wei W.	type III TGF-β receptor,
High expression of long non-coding RNA lncRNA-ATB is correlated with metastases and promotes cell migration and invasion in renal cell carcinoma.	/pubmed/26848077	Xiong J, Liu Y, Jiang L, Zeng Y, Tang W.	lncRNA-ATB, transforming growth factor β
The feedback loop between miR-124 and TGF-Ô_ pathway plays a significant role in non-small cell lung cancer metastasis.	/pubmed/26818357	Zu L, Xue Y, Wang J, Fu Y, Wang X, Xiao G, Hao M, Sun X, Wang Y, Fu G, Wang J.	miR-124, TGF-β, Smad4, Smad2/3, Snail, Slug, ZEB2, DNMT3a,
Smad2/3-Regulated Expression of DLX2 Is Associated with Radiation-Induced Epithelial-Mesenchymal Transition and Radioresistance of A549 and MDA-MB-231 Human Cancer Cell Lines.	/pubmed/26799321	Choi YJ, Baek GY, Park HR, Jo SK, Jung U.	Smad2/3, DLX2, TGF-β1
TGF-Ô_ Signaling in Cancer.	/pubmed/26774024	Syed V.	TGF-β
miR-204 regulates the EMT by targeting snai1 to suppress the invasion and migration of gastric cancer.	/pubmed/26729198	Liu Z, Long J, Du R, Ge C, Guo K, Xu Y.	miR-204, Snai1, TGF-β1
MicroRNA-663 inhibits the proliferation, migration and invasion of glioblastoma cells via targeting TGF-Ô_1.	/pubmed/26717894	Li Q, Cheng Q, Chen Z, Peng R, Chen R, Ma Z, Wan X, Liu J, Meng M, Peng Z, Jiang B.	miR-663, MMP2, E-cadherin, TGF-β1
[Sunitinib suppresses migration of ovarian cancer cells through negative modulation of TGF-Ô_-mediated epithelial-mesenchymal transition].	/pubmed/26713520	Chen ZB, Chang LL, Zhou TY, Wang DD, Chen Y, Zhao PG, Zhu H.	TGF-β ,E-cadherin, Snail, Smads
Silencing of HMGA2 suppresses cellular proliferation, migration, invasion, and epithelial-mesenchymal transition in bladder cancer.	/pubmed/26684800	Shi Z, Li X, Wu D, Tang R, Chen R, Xue S, Sun X.	HMGA2, matrix metalloproteinase-2 (MMP-2), matrix metalloproteinase-9 (MMP-9), transforming growth factor-β (TGF-β)/Smad, Wnt/β-catenin
Dasatinib blocks transcriptional and promigratory responses to transforming growth factor-beta in pancreatic adenocarcinoma cells through inhibition of Smad signalling: implications for in vivo mode of action.	/pubmed/26588899	Bartscht T, Rosien B, Rades D, Kaufmann R, Biersack H, Lehnert H, Gieseler F, Ungefroren H.	TGF-β1, Smad2/3, ALK5
Neuropilin-2 induced by transforming growth factor-Ô_ augments migration of hepatocellular carcinoma cells.	/pubmed/26573807	Wittmann P, Grubinger M, Gr’_ger C, Huber H, Sieghart W, Peck-Radosavljevic M, Mikulits W.	Neuropilin-2, TGF-β/Smad
Galectin-1 Controls the Proliferation and Migration of Liver Sinusoidal Endothelial Cells and Their Interaction With Hepatocarcinoma Cells.	/pubmed/26551914	Manzi M, Bacigalupo ML, Carabias P, Elola MT, Wolfenstein-Todel C, Rabinovich GA, Espelt MV, Troncoso MF.	Gal1, TGF-β1
The natural compound codonolactone attenuates TGF-Ô_1-mediated epithelial-to-mesenchymal transition and motility of breast cancer cells.	/pubmed/26549400	Fu J, Ke X, Tan S, Liu T, Wang S, Ma J, Lu H.	TGF-β1, Runx2
TGF-Ô_-Induced Transcription Sustains Amoeboid Melanoma Migration and Dissemination.	/pubmed/26526369	Cantelli G, Orgaz JL, Rodriguez-Hernandez I, Karagiannis P, Maiques O, Matias-Guiu X, Nestle FO, Marti RM, Karagiannis SN, Sanz-Moreno V.	TGF-β, SMAD2, CITED1
Sanguiin H6 suppresses TGF-Ô_ induction of the epithelial-mesenchymal transition and inhibits migration and invasion in A549 lung cancer.	/pubmed/26508552	Ko H, Jeon H, Lee D, Choi HK, Kang KS, Choi KC.	TGF-β1, Smad2/3, E-cadherin, Snail, N-cadherin
COX-2 promotes metastasis in nasopharyngeal carcinoma by mediating interactions between cancer cells and myeloid-derived suppressor cells.	/pubmed/26451317	Li ZL, Ye SB, OuYang LY, Zhang H, Chen YS, He J, Chen QY, Qian CN, Zhang XS, Cui J, Zeng YX, Li J.	COX-2, β-catenin, TCF4, TGFβ, iNOS
Bone Morphogenetic Protein-7 Inhibits EMT-Associated Genes in Breast Cancer.	/pubmed/26431436	Ying X, Sun Y, He P.	Bone morphogenetic protein-7 (BMP7), TGFβ1
AMPK Inhibits the Stimulatory Effects of TGF-Ô_ on Smad2/3 Activity, Cell Migration, and Epithelial-to-Mesenchymal Transition.	/pubmed/26424816	Lin H, Li N, He H, Ying Y, Sunkara S, Luo L, Lv N, Huang D, Luo Z.	AMPK, TGF-β, Smad2/3, liver kinase 1 (LKB1), plasminogen activator inhibitor-1, fibronectin, and connective tissue growth factor, inteleukin-6
Thioredoxin 1 mediates TGF-Ô_-induced epithelial-mesenchymal transition in salivary adenoid cystic carcinoma.	/pubmed/26325518	Jiang Y, Feng X, Zheng L, Li SL, Ge XY, Zhang JG.	thioredoxin 1 (TXN), TGF-β, thioredoxin reductase 1 (TXNRD1), N-cadherin, E-cadherin, Snail, Slug, Akt, GSK-3β
DAL-1/4.1B contributes to epithelial-mesenchymal transition via regulation of transforming growth factor-Ô_ in lung cancer cell lines.	/pubmed/26300315	Yu F, Yang H, Zhang Z, Wang Z, Xiong J.	DAL-1/4.1B, transforming growth factor-β, E‑cadherin, β‑catenin
Identification of a PEAK1/ZEB1 signaling axis during TGFÔ_/fibronectin-induced EMT in breast cancer.	/pubmed/26297948	Agajanian M, Runa F, Kelber JA.	PEAK1, ZEB1, TGFβ, fibronectin, CRK, IL11, COL4A1, ITGB3
Kaempferol Suppresses Transforming Growth Factor-Ô_1-Induced Epithelial-to-Mesenchymal Transition and Migration of A549 Lung Cancer Cells by Inhibiting Akt1-Mediated Phosphorylation of Smad3 at Threonine-179.	/pubmed/26297431	Jo E, Park SJ, Choi YS, Jeon WK, Kim BC.	Transforming Growth Factor-β1, Akt1, E-cadherin, matrix metalloproteinase-2, Snail, Smad3, Smad4, Akt1
PEAK1 Acts as a Molecular Switch to Regulate Context-Dependent TGFÔ_ Responses in Breast Cancer.	/pubmed/26267863	Agajanian M, Campeau A, Hoover M, Hou A, Brambilla D, Kim SL, Klemke RL, Kelber JA.	PEAK1, TGFβ, fibronectin, Smad2/3, Src, MAPK
1-Methyl-D-tryptophan potentiates TGF-Ô_-induced epithelial-mesenchymal transition in T24 human bladder cancer cells.	/pubmed/26267811	Brito RB, Malta CS, Souza DM, Matheus LH, Matos YS, Silva CS, Ferreira JM, Nunes VS, Fran’_a CM, Dell’é H.	IDO, TGF-β1, e-cadherin, n-cadherin,
TRIM66 overexpresssion contributes to osteosarcoma carcinogenesis and indicates poor survival outcome.	/pubmed/26247633	Chen Y, Guo Y, Yang H, Shi G, Xu G, Shi J, Yin N, Chen D.	TGF-β, TRIM66
RNF111/Arkadia is regulated by DNA methylation and affects TGF-Ô_/Smad signaling associated invasion in NSCLC cells.	/pubmed/26238425	Chen H, Yang T, Lei Z, Wang L, Yang H, Tong X, Yang WT, Zhao J, Gu Y, Chen Y, Zhang HT.	RNF111, Arkadia, TGF-β, Smad3, Sp1, Snail, E-cadherin
Ionizing radiation induces a motile phenotype in human carcinoma cells in vitro through hyperactivation of the TGF-beta signaling pathway.	/pubmed/26238393	Carl C, Flindt A, Hartmann J, Dahlke M, Rades D, Dunst J, Lehnert H, Gieseler F, Ungefroren H.	TGF-β1, activin A,
Urocortin attenuates TGFÔ_1-induced Snail1 and slug expressions: inhibitory role of Smad7 in Smad2/3 signaling in breast cancer cells.	/pubmed/26138318	Jin L, Zhu C, Wang X, Li C, Cao C, Yuan J, Li S.	Urocortin, TGFβ1, Snail1, slug, Smad7, Smad2/3
Translational regulation of inhibin Ô_A by TGFÔ_ via the RNA-binding protein hnRNP E1 enhances the invasiveness of epithelial-to-mesenchymal transitioned cells.	/pubmed/26096938	Howley BV, Hussey GS, Link LA, Howe PH.	inhibin βA, TGFβ, hnRNP E1, activin A.
Downregulating HMGA2 attenuates epithelial-mesenchymal transition-induced invasion and migration in nasopharyngeal cancer cells.	/pubmed/26025649	Xia YY, Yin L, Jiang N, Guo WJ, Tian H, Jiang XS, Wu J, Chen M, Wu JZ, He X.	HMGA2, Vimentin, Snail, E-cadherin, TGFβRII, Smad3
Periostin Mediates TGF-Ô_-Induced Epithelial Mesenchymal Transition in Prostate Cancer Cells.	/pubmed/26021267	Hu Q, Tong S, Zhao X, Ding W, Gou Y, Xu K, Sun C, Xia G.	periostin, Akt, GSK-3β, PI3K, TGF-β, STAT3, Twist1
All-trans-retinoic Acid Modulates the Plasticity and Inhibits the Motility of Breast Cancer Cells: ROLE OF NOTCH1 AND TRANSFORMING GROWTH FACTOR (TGFÔ_).	/pubmed/26018078	Zanetti A, Affatato R, Centritto F, Fratelli M, Kurosaki M, Barzago MM, Bolis M, Terao M, Garattini E, Paroni G.	NOTCH1, EGF, heregulin-β1, γ-secretase, TGFβ
Loss of RAB1B promotes triple-negative breast cancer metastasis by activating TGF-Ô_/SMAD signaling.	/pubmed/25970785	Jiang HL, Sun HF, Gao SP, Li LD, Hu X, Wu J, Jin W.	RAB1B, GF-β, SMAD3
TGF-Ô_1-induced EMT promotes targeted migration of breast cancer cells through the lymphatic system by the activation of CCR7/CCL21-mediated chemotaxis.	/pubmed/25961925	Pang MF, Georgoudaki AM, Lambut L, Johansson J, Tabor V, Hagikura K, Jin Y, Jansson M, Alexander JS, Nelson CM, Jakobsson L, Betsholtz C, Sund M, Karlsson MC, Fuxe J.	TGF-β1, CCR7, CCL21, p38 MAP kinase, JunB
FOXQ1 mediates the crosstalk between TGF-Ô_ and Wnt signaling pathways in the progression of colorectal cancer.	/pubmed/25955104	Peng X, Luo Z, Kang Q, Deng D, Wang Q, Peng H, Wang S, Wei Z.	FOXQ1, TGF-β, Wnt, β-catenin
MicroRNA-125b attenuates epithelial-mesenchymal transitions and targets stem-like liver cancer cells through small mothers against decapentaplegic 2 and 4.	/pubmed/25953743	Zhou JN, Zeng Q, Wang HY, Zhang B, Li ST, Nan X, Cao N, Fu CJ, Yan XL, Jia YL, Wang JX, Zhao AH, Li ZW, Li YH, Xie XY, Zhang XM, Dong Y, Xu YC, He LJ, Yue W, Pei XT.	MicroRNA-125b, SMAD2/4
Pregnancy associated plasma protein-A links pregnancy and melanoma progression by promoting cellular migration and invasion.	/pubmed/25940796	Prithviraj P, Anaka M, McKeown SJ, Permezel M, Walkiewicz M, Cebon J, Behren A, Jayachandran A.	Pregnancy-Associated Plasma Protein-A (PAPPA), IGF1, IGFBP4
Resveratrol suppresses epithelial-to-mesenchymal transition in colorectal cancer through TGF-Ô_1/Smads signaling pathway mediated Snail/E-cadherin expression.	/pubmed/25884904	Ji Q, Liu X, Han Z, Zhou L, Sui H, Yan L, Jiang H, Ren J, Cai J, Li Q.	TGF-β1, E-cadherin, Vimentin, Smads
Genetic depletion and pharmacological targeting of Ô±v integrin in breast cancer cells impairs metastasis in zebrafish and mouse xenograft models.	/pubmed/25849225	Li Y, Drabsch Y, Pujuguet P, Ren J, van Laar T, Zhang L, van Dam H, Cl’©ment-Lacroix P, Ten Dijke P.	αv integrin, TGF-β, Smad
Fibulin-3 is a novel TGF-Ô_ pathway inhibitor in the breast cancer microenvironment.	/pubmed/25823021	Tian H, Liu J, Chen J, Gatza ML, Blobe GC.	fibulin-3, type I TGF-β receptor (TβRI), type II TGF-β receptor (TβRII), TGF-β
Endothelial-mesenchymal transition of brain endothelial cells: possible role during metastatic extravasation.	/pubmed/25822751	Krizbai IA, Gasparics ’, Nagy•szi P, Fazakas C, Moln’r J, Wilhelm I, Bencs R, Rosivall L, Sebe A.	TGF-β1, fibronectin, β1-integrin, calponin, α-smooth muscle actin (SMA). claudin-5, Smad2 and Smad3
Dynamic Sialylation in Transforming Growth Factor-Ô_ (TGF-Ô_)-induced Epithelial to Mesenchymal Transition.	/pubmed/25809486	Du J, Hong S, Dong L, Cheng B, Lin L, Zhao B, Chen YG, Chen X.	Integrin β4
Loss of MicroRNA-101 Promotes Epithelial to Mesenchymal Transition in Hepatocytes.	/pubmed/25808945	Zhao S, Zhang Y, Zheng X, Tu X, Li H, Chen J, Zang Y, Zhang J.	ZEB1, E-cadherin, miR-101
G9a is essential for EMT-mediated metastasis and maintenance of cancer stem cell-like characters in head and neck squamous cell carcinoma.	/pubmed/25749385	Liu S, Ye D, Guo W, Yu W, He Y, Hu J, Wang Y, Zhang L, Liao Y, Song H, Zhong S, Xu D, Yin H, Sun B, Wang X, Liu J, Wu Y, Zhou BP, Zhang Z, Deng J.	G9a, Snail, E-cadherin, histone H3 lysine-9 (H3K9), TGF-β
Endothelial-mesenchymal transition of brain endothelial cells: possible role during metastatic extravasation.	/pubmed/25742314	Krizbai IA, Gasparics ’, Nagy•szi P, Fazakas C, Moln’r J, Wilhelm I, Bencs R, Rosivall L, Sebe A.	TGF-β1, fibronectin, β1-integrin, calponin and α-smooth muscle actin (SMA). Claudin-5, Smad2 and Smad3
Helicobacter pylori Might Induce TGF-Ô_1-Mediated EMT by Means of cagE.	/pubmed/25735663	Chang H, Kim N, Park JH, Nam RH, Choi YJ, Park SM, Choi YJ, Yoon H, Shin CM, Lee DH.	TGF-β1, cagE.
p53 and Ô”Np63Ô± Coregulate the Transcriptional and Cellular Response to TGFÔ_ and BMP Signals.	/pubmed/25700283	Balboni AL, Cherukuri P, Ung M, DeCastro AJ, Cheng C, DiRenzo J.	p53, ΔNp63α, TGFβ and BMPs, SMAD1/5/8, ID2
Pien Tze Huang inhibits liver metastasis by targeting TGF-Ô_ signaling in an orthotopic model of colorectal cancer.	/pubmed/25653118	Lin W, Zhuang Q, Zheng L, Cao Z, Shen A, Li Q, Fu C, Feng J, Peng J.	TGF-β, Smad2/3, Smad4
Genetic and pharmacologic inhibition of eIF4E reduces breast cancer cell migration, invasion, and metastasis.	/pubmed/25608710	Pettersson F, Del Rincon SV, Emond A, Huor B, Ngan E, Ng J, Dobocan MC, Siegel PM, Miller WH Jr.	eIF4E, MMP-3 and MMP-9
Long non-coding RNAs (LncRNA) regulated by transforming growth factor (TGF) Ô_: LncRNA-hit-mediated TGFÔ_-induced epithelial to mesenchymal transition in mammary epithelia.	/pubmed/25605728	Richards EJ, Zhang G, Li ZP, Permuth-Wey J, Challa S, Li Y, Kong W, Dan S, Bui MM, Coppola D, Mao WM, Sellers TA, Cheng JQ.	lncRNA-HIT (HOXA transcript induced by TGFβ), TGFβ
SND1 Acts Downstream of TGFÔ_1 and Upstream of Smurf1 to Promote Breast Cancer Metastasis.	/pubmed/25596283	Yu L, Liu X, Cui K, Di Y, Xin L, Sun X, Zhang W, Yang X, Wei M, Yao Z, Yang J.	SND1, TGFβ1, Smurf1, RhoA
Transcription factor glioma-associated oncogene homolog 1 is required for transforming growth factor-Ô_1-induced epithelial-mesenchymal transition of non-small cell lung cancer cells.	/pubmed/25586417	Li H, Da LJ, Fan WD, Long XH, Zhang XQ.	human glioma‑associated oncogene homolog 1 (Gli1), GANT 61, TGF‑β1
HOXB7 promotes malignant progression by activating the TGFÔ_ signaling pathway.	/pubmed/25542862	Liu S, Jin K, Hui Y, Fu J, Jie C, Feng S, Reisman D, Wang Q, Fan D, Sukumar S, Chen H.	TGFβ2, SMAD3, HOXB7
Ginsenoside Rg1 attenuates invasion and migration by inhibiting transforming growth factor-Ô_1-induced epithelial to mesenchymal transition in HepG2 cells.	/pubmed/25515352	Yu M, Yu X, Guo D, Yu B, Li L, Liao Q, Xing R.	TGF‑β1, E‑cadherin, vimentin
Pien Tze Huang inhibits metastasis of human colorectal carcinoma cells via modulation of TGF-Ô_1/ZEB/miR-200 signaling network.	/pubmed/25422078	Shen A, Lin W, Chen Y, Liu L, Chen H, Zhuang Q, Lin J, Sferra TJ, Peng J.	TGF-β1, miR-200, Smad2/3, Smad4. ZEB1, ZEB2, N-cadherin, E-cadherin
Research on the efficacy of Celastrus Orbiculatus in suppressing TGF-Ô_1-induced epithelial-mesenchymal transition by inhibiting HSP27 and TNF-Ô±-induced NF-Ô_ B/Snail signaling pathway in human gastric adenocarcinoma.	/pubmed/25370696	Zhu Y, Liu Y, Qian Y, Dai X, Yang L, Chen J, Guo S, Hisamitsu T.	TGF-β1, HSP27, TNF-α, NF-κ B/Snail, E-cadherin, Vimentin, N-cadherin
Loss of BRMS1 promotes a mesenchymal phenotype through NF-Ô_B-dependent regulation of Twist1.	/pubmed/25368381	Liu Y, Mayo MW, Xiao A, Hall EH, Amin EB, Kadota K, Adusumilli PS, Jones DR.	BRMS1, NF-κB, Twist1, RelA, p65, K310
TAZ promotes epithelial to mesenchymal transition via the upregulation of connective tissue growth factor expression in neuroblastoma cells.	/pubmed/25354978	Wang Q, Xu Z, An Q, Jiang D, Wang L, Liang B, Li Z.	TAZ, connective tissue growth factor (CTGF), TGF‑β, Smad3
Oct-4 and Nanog promote the epithelial-mesenchymal transition of breast cancer stem cells and are associated with poor prognosis in breast cancer patients.	/pubmed/25301732	Wang D, Lu P, Zhang H, Luo M, Zhang X, Wei X, Gao J, Zhao Z, Liu C.	TGF-β, Oct-4, Nanog, N-cadherin, vimentin, Slug, Snail, E-cadherin, cytokeratin 18
Fra-1/AP-1 induces EMT in mammary epithelial cells by modulating Zeb1/2 and TGFÔ_ expression.	/pubmed/25301070	Bakiri L, Macho-Maschler S, Custic I, Niemiec J, Gu’_o-Carri’_n A, Hasenfuss SC, Eger A, M’_ller M, Beug H, Wagner EF.	Fra-1, AP-1, Zeb1/2, TGFβ, TGFβ1 , Slug
Forkhead factor FOXQ1 promotes TGF-Ô_1 expression and induces epithelial-mesenchymal transition.	/pubmed/25287361	Fan DM, Feng XS, Qi PW, Chen YW.	FOXQ1, TGF-β1, E-cadherin, N-cadherin
Metabolic reprogramming during TGFÔ_1-induced epithelial-to-mesenchymal transition.	/pubmed/25284588	Jiang L, Xiao L, Sugiura H, Huang X, Ali A, Kuro-o M, Deberardinis RJ, Boothman DA.	TGFβ1, carbohydrate-responsive-element-binding protein (ChREBP), fatty acid synthase (FASN),
Wild-type p53 inhibits pro-invasive properties of TGF-Ô_3 in breast cancer, in part through regulation of EPHB2, a new TGF-Ô_ target gene.	/pubmed/25257729	Lam S, Wiercinska E, Teunisse AF, Lodder K, ten Dijke P, Jochemsen AG.	p53, TGF-β3, EPHB2, matrix metallo proteinase (MMP)2, MMP9, integrin β 3
Axl activates autocrine transforming growth factor-Ô_ signaling in hepatocellular carcinoma.	/pubmed/25251599	Reichl P, Dengler M, van Zijl F, Huber H, F’_hrlinger G, Reichel C, Sieghart W, Peck-Radosavljevic M, Grubinger M, Mikulits W.	Axl, 14-3-3ζ, TGF-β, Smad3, PAI1, MMP9, Snail
HMGA2 induces transcription factor Slug expression to promote epithelial-to-mesenchymal transition and contributes to colon cancer progression.	/pubmed/25218351	Li Y, Zhao Z, Xu C, Zhou Z, Zhu Z, You T.	high-mobility group AT-hook 2 (HMGA2), extracellular signal-regulated kinase (ERK)1/2, TGF-β, Slug
PDGF receptor-Ô± promotes TGF-Ô_ signaling in hepatic stellate cells via transcriptional and posttranscriptional regulation of TGF-Ô_ receptors.	/pubmed/25169976	Liu C, Li J, Xiang X, Guo L, Tu K, Liu Q, Shah VH, Kang N.	PDGF, TGF-β, PDGF receptor-α (PDGFR-α), SMAD2,
Doxycycline inducible Kr’_ppel-like factor 4 lentiviral vector mediates mesenchymal to epithelial transition in ovarian cancer cells.	/pubmed/25137052	Chen Z, Wang Y, Liu W, Zhao G, Lee S, Balogh A, Zou Y, Guo Y, Zhang Z, Gu W, Li C, Tigyi G, Yue J.	Krüppel-like factor 4 (KLF4), E-cadherin, vimentin, twist1 snail2 (slug)
High NR2F2 transcript level is associated with increased survival and its expression inhibits TGF-Ô_-dependent epithelial-mesenchymal transition in breast cancer.	/pubmed/25129343	Zhang C, Han Y, Huang H, Qu L, Shou C.	NR2F2, TGF-β, E-cadherin, Slug.
HOXB9 promotes epithelial-to-mesenchymal transition via transforming growth factor-Ô_1 pathway in hepatocellular carcinoma cells.	/pubmed/25081022	Sha L, Dong L, Lv L, Bai L, Ji X.	TGF-β1, HOXB9
The role of RhoC in epithelial-to-mesenchymal transition of ovarian carcinoma cells.	/pubmed/24986540	Gou WF, Zhao Y, Lu H, Yang XF, Xiu YL, Zhao S, Liu JM, Zhu ZT, Sun HZ, Liu YP, Xu F, Takano Y, Zheng HC.	TGF-β1R, VEGFR, N-cadherin, α-SMA, snail, Notch1, E-cadherin, RhoC
Trim28 contributes to EMT via regulation of E-cadherin and N-cadherin in lung cancer cell lines.	/pubmed/24983967	Chen L, Mu’±oz-Antonia T, Cress WD.	Trim28, TGF-β, E-cadherin, N-cadherin
Akt-mediated transforming growth factor-Ô_1-induced epithelial-mesenchymal transition in cultured human esophageal squamous cancer cells.	/pubmed/24874843	Xuan X, Zeng Q, Li Y, Gao Y, Wang F, Zhang H, Wang Z, He H, Li S.	Akt, p-Akt, cadherin (E-cadherin), TGF-β1, E-cadherin, Vimentin
Wild-type and mutant p53 differentially regulate NADPH oxidase 4 in TGF-Ô_-mediated migration of human lung and breast epithelial cells.	/pubmed/24714748	Boudreau HE, Casterline BW, Burke DJ, Leto TL.	p53, TGF-β, Nox4, ROS, FAK
Loss of SMAD4 alters BMP signaling to promote colorectal cancer cell metastasis via activation of Rho and ROCK.	/pubmed/24704720	Voorneveld PW, Kodach LL, Jacobs RJ, Liv N, Zonnevylle AC, Hoogenboom JP, Biemond I, Verspaget HW, Hommes DW, de Rooij K, van Noesel CJ, Morreau H, van Wezel T, Offerhaus GJ, van den Brink GR, Peppelenbosch MP, Ten Dijke P, Hardwick JC.	SMAD4, BMP, Rho, ROCK
Widespread FRA1-dependent control of mesenchymal transdifferentiation programs in colorectal cancer cells.	/pubmed/24658684	Diesch J, Sanij E, Gilan O, Love C, Tran H, Fleming NI, Ellul J, Amalia M, Haviv I, Pearson RB, Tulchinsky E, Mariadason JM, Sieber OM, Hannan RD, Dhillon AS.
Inhibition of mTOR pathway attenuates migration and invasion of gallbladder cancer via EMT inhibition.	/pubmed/24623408	Zong H, Yin B, Zhou H, Cai D, Ma B, Xiang Y.	Vimentin, Ecadherin, mTOR, mTOR, TGF-β, mTORC2
Nuclear receptor NR4A1 promotes breast cancer invasion and metastasis by activating TGF-Ô_ signalling.	/pubmed/24584437	Zhou F, Drabsch Y, Dekker TJ, de Vinuesa AG, Li Y, Hawinkels LJ, Sheppard KA, Goumans MJ, Luwor RB, de Vries CJ, Mesker WE, Tollenaar RA, Devilee P, Lu CX, Zhu H, Zhang L, Dijke PT.	NR4A1, TGF-β, SMAD2, AXIN2-RNF12, ARKADIA, SMAD7
JAK/STAT3 signaling is required for TGF-Ô_-induced epithelial-mesenchymal transition in lung cancer cells.	/pubmed/24573038	Liu RY, Zeng Y, Lei Z, Wang L, Yang H, Liu Z, Zhao J, Zhang HT.	TGF-β1, Smad3 (p-Smad3), Snail, E-cadherin, vimentin , IL6, MMP2, PAI-1, Stat3
Prostate apoptosis response-4 mediates TGF-Ô_-induced epithelial-to-mesenchymal transition.	/pubmed/24503536	Chaudhry P, Fabi F, Singh M, Parent S, Leblanc V, Asselin E.	TGF-β, Par-4, Smad2, IκB-α, ALK5, phosphoinositide 3-kinase, NF-κB, Snail, vimentin, zinc-finger E-box binding homeobox 1, N-Cadherin, Claudin-1, E-Cadherin.
Tumor suppressor NDRG2 tips the balance of oncogenic TGF-Ô_ via EMT inhibition in colorectal cancer.	/pubmed/24492480	Shen L, Qu X, Ma Y, Zheng J, Chu D, Liu B, Li X, Wang M, Xu C, Liu N, Yao L, Zhang J.	NDRG2 (N-Myc downstream-regulated gene 2), TGF-β, Sp1, c-Myc/Miz-1
CUB-domain containing protein 1 represses the epithelial phenotype of pancreatic cancer cells.	/pubmed/24384474	Miura S, Hamada S, Masamune A, Satoh K, Shimosegawa T.	CUB-domain containing protein-1 (CDCP1), E-cadherin, N-cadherin, Bone morphogenetic protein 4 (BMP4)
Rac1b negatively regulates TGF-Ô_1-induced cell motility in pancreatic ductal epithelial cells by suppressing Smad signalling.	/pubmed/24378395	Ungefroren H, Sebens S, Giehl K, Helm O, Groth S, F’_ndrich F, R’_cken C, Sipos B, Lehnert H, Gieseler F.	Rac1b, TGF-β1, Smad
Cancer-associated fibroblasts induce epithelial-mesenchymal transition of breast cancer cells through paracrine TGF-Ô_ signalling.	/pubmed/24335925	Yu Y, Xiao CH, Tan LD, Wang QS, Li XQ, Feng YM.	TGF-β1, Smad
Snail mediates invasion through uPA/uPAR and the MAPK signaling pathway in prostate cancer cells.	/pubmed/26889270	Randle DD, Clarke S, Henderson V, Odero-Marah VA.	Snail, uPA/uPAR, MAPK,
MiR-134/487b/655 cluster regulates TGF-Ô_-induced epithelial-mesenchymal transition and drug resistance to gefitinib by targeting MAGI2 in lung adenocarcinoma cells.	/pubmed/24258346	Kitamura K, Seike M, Okano T, Matsuda K, Miyanaga A, Mizutani H, Noro R, Minegishi Y, Kubota K, Gemma A.	MiR-134/487b/655, TGF-β, MAGI2
Epstein-Barr virus nuclear antigen 1 (EBNA1) protein induction of epithelial-mesenchymal transition in nasopharyngeal carcinoma cells.	/pubmed/24190575	Wang L, Tian WD, Xu X, Nie B, Lu J, Liu X, Zhang B, Dong Q, Sunwoo JB, Li G, Li XP.	EBNA1, microRNA 200a (miR-200a), miR-200b, zinc finger E-box binding homeobox 1 ( ZEB1) and ZEB2
Context-dependent adaption of EpCAM expression in early systemic esophageal cancer.	/pubmed/24141784	Driemel C, Kremling H, Schumacher S, Will D, Wolters J, Lindenlauf N, Mack B, Baldus SA, Hoya V, Pietsch JM, Panagiotidou P, Raba K, Vay C, Vallb’_hmer D, Harr’©us U, Knoefel WT, Stoecklein NH, Gires O.	TGFβ, EpCAM
CDK5 is essential for TGF-Ô_1-induced epithelial-mesenchymal transition and breast cancer progression.	/pubmed/24121667	Liang Q, Li L, Zhang J, Lei Y, Wang L, Liu DX, Feng J, Hou P, Yao R, Zhang Y, Huang B, Lu J.	CDK5, TGF-β1, p35, FAK
Neuropilin-2 Is upregulated in lung cancer cells during TGF-Ô_1-induced epithelial-mesenchymal transition.	/pubmed/24121493	Nasarre P, Gemmill RM, Potiron VA, Roche J, Lu X, Bar’_n AE, Korch C, Garrett-Mayer E, Lagana A, Howe PH, Drabkin HA.	neuropilin (NRP)-2, TGF-β1, TβRI, SMAD, Extracellular signal-regulated kinase (ERK) and AKT
Resolvin D1 inhibits TGF-Ô_1-induced epithelial mesenchymal transition of A549 lung cancer cells via lipoxin A4 receptor/formyl peptide receptor 2 and GPR32.	/pubmed/24120851	Lee HJ, Park MK, Lee EJ, Lee CH.	TGF-β1, E-cadherin, N-cadherin, lipoxin A4 receptor/formyl peptide receptor 2 (ALX/FPR2), GPR32, ZEB1
microRNA-10b enhances pancreatic cancer cell invasion by suppressing TIP30 expression and promoting EGF and TGF-Ô_ actions.	/pubmed/24096486	Ouyang H, Gore J, Deitz S, Korc M.	microRNA-10b ,TIP30, EGF, TGF-β, EGF receptor (EGFR), PI3K (phosphatidylinositol 3'-kinase), MEK, RAP2A, EPHB2, KLF4 and NF1.
JMJD2B promotes epithelial-mesenchymal transition by cooperating with Ô_-catenin and enhances gastric cancer metastasis.	/pubmed/24077348	Zhao L, Li W, Zang W, Liu Z, Xu X, Yu H, Yang Q, Jia J.	histone demethylase Jumonji domain-containing protein 2B (JMJD2B), β-catenin, vimentin
ILEI drives epithelial to mesenchymal transition and metastatic progression in the lung cancer cell line A549.	/pubmed/24072492	Song Q, Sheng W, Zhang X, Jiao S, Li F.	interleukin-like EMT inducer (ILEI), poly r(C)-binding protein 1 (PCBP1), TGF-β, protein kinase Bβ/Akt2, hnRNP E1, maintain, CD24(low)CD44(high) cells
Hepatocyte nuclear factor 6 suppresses the migration and invasive growth of lung cancer cells through p53 and the inhibition of epithelial-mesenchymal transition.	/pubmed/24022481	Yuan XW, Wang DM, Hu Y, Tang YN, Shi WW, Guo XJ, Song JG.	Hepatocyte nuclear factor 6 (HNF6), TGF-β1, p53, E-cadherin
Protumorigenic actions of S100A2 involve regulation of PI3/Akt signaling and functional interaction with Smad3.	/pubmed/23996929	Naz S, Bashir M, Ranganathan P, Bodapati P, Santosh V, Kondaiah P.	S100A2, PI3/Akt, Smad3, TGF-β, Akt, E-cadherin, Smad3
Resveratrol inhibits the epithelial-mesenchymal transition of pancreatic cancer cells via suppression of the PI-3K/Akt/NF-Ô_B pathway.	/pubmed/23992306	Li W, Ma J, Ma Q, Li B, Han L, Liu J, Xu Q, Duan W, Yu S, Wang F, Wu E.	NR4A1, TGF-β, AXIN2-RNF12/ARKADIA, SMAD7, SMAD2, NR4A1
Loss of a negative feedback loop involving pea3 and cyclin d2 is required for pea3-induced migration in transformed mammary epithelial cells.	/pubmed/23989931	Ladam F, Damour I, Dumont P, Kherrouche Z, de Launoit Y, Tulasne D, Chotteau-Lelievre A.	Ets family transcription factor Pea3 (ETV4), TGF-β1, Cyclin D2 (CCND2)
TRAF4 promotes TGF-Ô_ receptor signaling and drives breast cancer metastasis.	/pubmed/23973329	Zhang L, Zhou F, Garc’_a de Vinuesa A, de Kruijf EM, Mesker WE, Hui L, Drabsch Y, Li Y, Bauer A, Rousseau A, Sheppard KA, Mickanin C, Kuppen PJ, Lu CX, Ten Dijke P.	tumor necrosis factor receptor-associated factor 4 (TRAF4), TGF-β, SMAD, E3 ligase SMURF2, deubiquitinase USP15, TGF-β type I receptor (TβRI), TGF-β-activated kinase (TAK)1.
Transforming growth factor-Ô_ and epithelial-mesenchymal transition are associated with pulmonary metastasis in adenoid cystic carcinoma.	/pubmed/23962790	Dong L, Ge XY, Wang YX, Yang LQ, Li SL, Yu GY, Gao Y, Fu J.	TGF-β1, phospho-Smad2, β-catenin, TβRIIDN
High levels of secreted frizzled-related protein 1 correlate with poor prognosis and promote tumourigenesis in gastric cancer.	/pubmed/23927957	Qu Y, Ray PS, Li J, Cai Q, Bagaria SP, Moran C, Sim MS, Zhang J, Turner RR, Zhu Z, Cui X, Liu B.	Secreted frizzled-related protein 1 (sFRP1), TGFβ (transforming growth factor-beta)
SOX4 is associated with poor prognosis in prostate cancer and promotes epithelial-mesenchymal transition in vitro.	/pubmed/23917306	Wang L, Zhang J, Yang X, Chang YW, Qi M, Zhou Z, Zhang J, Han B.	SOX4, TGF-β (transforming growth factor-β)
Downregulation of CFTR promotes epithelial-to-mesenchymal transition and is associated with poor prognosis of breast cancer.	/pubmed/23916755	Zhang JT, Jiang XH, Xie C, Cheng H, Da Dong J, Wang Y, Fok KL, Zhang XH, Sun TT, Tsang LL, Chen H, Sun XJ, Chung YW, Cai ZM, Jiang WG, Chan HC.	cystic fibrosis transmembrane conductance regulator (CFTR), TGF-β1, NFκB, urokinase-type plasminogen activator (uPA)
Par6 is phosphorylated by aPKC to facilitate EMT.	/pubmed/23880940	Gunaratne A, Di Guglielmo GM.	TGFβ, Par6
Celastrol inhibits TGF-Ô_1-induced epithelial-mesenchymal transition by inhibiting Snail and regulating E-cadherin expression.	/pubmed/23850675	Kang H, Lee M, Jang SW.	Transforming growth factor-beta 1 (TGF-β1), Snail, E-cadherin
DEAR1 is a chromosome 1p35 tumor suppressor and master regulator of TGF-Ô_-driven epithelial-mesenchymal transition.	/pubmed/23838884	Chen N, Balasenthil S, Reuther J, Frayna A, Wang Y, Chandler DS, Abruzzo LV, Rashid A, Rodriguez J, Lozano G, Cao Y, Lokken E, Chen J, Frazier ML, Sahin AA, Wistuba II, Sen S, Lott ST, Killary AM.	DEAR1, TGF-β, SMAD3, SNAIL1 and SNAIL2
Complex temporal changes in TGFÔ_ oncogenic signaling drive thyroid carcinogenesis in a mouse model.	/pubmed/23698635	Kim DW, Walker RL, Meltzer PS, Cheng SY.	transforming growth factor β (TGF β), pSMAD2/3, E-cadherin, fibronectin, vimentin, collagens and laminins.
Enrichment map profiling of the cancer invasion front suggests regulation of colorectal cancer progression by the bone morphogenetic protein antagonist, gremlin-1.	/pubmed/23659962	Karagiannis GS, Berk A, Dimitromanolakis A, Diamandis EP.	bone morphogenetic protein (BMP
Stem cell marker nestin is critical for TGF-Ô_1-mediated tumor progression in pancreatic cancer.	/pubmed/23552743	Su HT, Weng CC, Hsiao PJ, Chen LH, Kuo TL, Chen YW, Kuo KK, Cheng KH.	nestin, Smad4, TGF-β1
Characterization of spontaneous and TGF-Ô_-induced cell motility of primary human normal and neoplastic mammary cells in vitro using novel real-time technology.	/pubmed/23457587	Mandel K, Seidl D, Rades D, Lehnert H, Gieseler F, Hass R, Ungefroren H.	TGF-β1, MMP-2, uPA
Naringenin decreases invasiveness and metastasis by inhibiting TGF-Ô_-induced epithelial to mesenchymal transition in pancreatic cancer cells.	/pubmed/23300530	Lou C, Zhang F, Yang M, Zhao J, Zeng W, Fang X, Zhang Y, Zhang C, Liang W.	Transforming growth factor-β (TGF-β), Smad3, vimentin, N-cadherin, MMP2 and MMP9
High-throughput RNAi screening for novel modulators of vimentin expression identifies MTHFD2 as a regulator of breast cancer cell migration and invasion.	/pubmed/23295955	Lehtinen L, Ketola K, M’_kel’_ R, Mpindi JP, Viitala M, Kallioniemi O, Iljin K.	EPHB4, WIPF2 and MTHFD2, CD44
Inhibition of breast cancer metastases by a novel inhibitor of TGFÔ_ receptor 1.	/pubmed/23178439	Fang Y, Chen Y, Yu L, Zheng C, Qi Y, Li Z, Yang Z, Zhang Y, Shi T, Luo J, Liu M.	TGFβR1
Epithelial to mesenchymal transition and cancer stem cell phenotypes leading to liver metastasis are abrogated by the novel TGFÔ_1-targeting peptides P17 and P144.	/pubmed/23153552	Zubeldia IG, Bleau AM, Redrado M, Serrano D, Agliano A, Gil-Puig C, Vidal-Vanaclocha F, Lecanda J, Calvo A.	TGFβ(1), Smad2, Smad3, Smad1/5/8, CD44
Resveratrol inhibits TGF-Ô_1-induced epithelial-to-mesenchymal transition and suppresses lung cancer invasion and metastasis.	/pubmed/23146760	Wang H, Zhang H, Tang L, Chen H, Wu C, Zhao M, Yang Y, Chen X, Liu G.	Fibronectin, Vimentin, TGF-β1, Snail1, Slug, Twist1
Tumor-derived secretory clusterin induces epithelial-mesenchymal transition and facilitates hepatocellular carcinoma metastasis.	/pubmed/23010347	Wang C, Jiang K, Kang X, Gao D, Sun C, Li Y, Sun L, Zhang S, Liu X, Wu W, Yang P, Guo K, Liu Y.	Secretory clusterin (sCLU), TGF-β1, smad3
SOX4 induces epithelial-mesenchymal transition and contributes to breast cancer progression.	/pubmed/22787120	Zhang J, Liang Q, Lei Y, Yao M, Li L, Gao X, Feng J, Zhang Y, Gao H, Liu DX, Lu J, Huang B.	SOX4, CD44(high)/CD24(low) cells, TGF-β, Ras
Lack of transforming growth factor-Ô_ signaling promotes collective cancer cell invasion through tumor-stromal crosstalk.	/pubmed/22748014	Matise LA, Palmer TD, Ashby WJ, Nashabi A, Chytil A, Aakre M, Pickup MW, Gorska AE, Zijlstra A, Moses HL.	TGF-β, Igfbp4, Tspan13, Col1α2, Bmp7, Gng11, Vcan, Tmeff1, and Dsc2
Nox4 involvement in TGF-beta and SMAD3-driven induction of the epithelial-to-mesenchymal transition and migration of breast epithelial cells.	/pubmed/22728268	Boudreau HE, Casterline BW, Rada B, Korzeniowska A, Leto TL.	TGF-beta, Nox4, ROS, SMAD3, NADPH oxidase
USP4 is regulated by AKT phosphorylation and directly deubiquitylates TGF-Ô_ type I receptor.	/pubmed/22706160	Zhang L, Zhou F, Drabsch Y, Gao R, Snaar-Jagalska BE, Mickanin C, Huang H, Sheppard KA, Porter JA, Lu CX, ten Dijke P.	USP4, AKT, TGF-β type I receptor,
The Src family kinase inhibitors PP2 and PP1 effectively block TGF-beta1-induced cell migration and invasion in both established and primary carcinoma cells.	/pubmed/22699812	Bartscht T, Lehnert H, Gieseler F, Ungefroren H.	TGF-β1, MMP2, MMP9, ALK5, Src
Biological significance of tumor budding at the invasive front of human colorectal carcinoma cells.	/pubmed/22569829	Yusra, Semba S, Yokozaki H.	TGF-β1, CD133, SNAI1, matrix metalloproteinase 2 (MMP2),
Human peroxiredoxin 1 modulates TGF-Ô_1-induced epithelial-mesenchymal transition through its peroxidase activity.	/pubmed/22475482	Ha B, Kim EK, Kim JH, Lee HN, Lee KO, Lee SY, Jang HH.	transforming growth factor-β1 (TGF-β1), human peroxiredoxin 1 (hPrx1), E-cadherin
Response gene to complement-32 enhances metastatic phenotype by mediating transforming growth factor beta-induced epithelial-mesenchymal transition in human pancreatic cancer cell line BxPC-3.	/pubmed/22458379	Zhu L, Qin H, Li PY, Xu SN, Pang HF, Zhao HZ, Li DM, Zhao Q.	RGC-32, E-cadherin, TGF-β
The iron chelators Dp44mT and DFO inhibit TGF-Ô_-induced epithelial-mesenchymal transition via up-regulation of N-Myc downstream-regulated gene 1 (NDRG1).	/pubmed/22453918	Chen Z, Zhang D, Yue F, Zheng M, Kovacevic Z, Richardson DR.	Transforming growth factor-β (TGF-β), N-myc downstream-regulated gene-1 (NDRG1), E-cadherin and β-catenin
TGF-Ô_-induced activation of mTOR complex 2 drives epithelial-mesenchymal transition and cell invasion.	/pubmed/22399812	Lamouille S, Connolly E, Smyth JW, Akhurst RJ, Derynck R.	mTOR complex 2 (mTORC2), TGF-β
A dual role for hypoxia inducible factor-1Ô± in the hepatitis C virus lifecycle and hepatoma migration.	/pubmed/22178269	Wilson GK, Brimacombe CL, Rowe IA, Reynolds GM, Fletcher NF, Stamataki Z, Bhogal RH, Sim’µes ML, Ashcroft M, Afford SC, Mitry RR, Dhawan A, Mee CJ, H’_bscher SG, Balfe P, McKeating JA.	Snail, Twist, hypoxia inducible factor-1α (HIF-1α), vascular endothelial growth factor (VEGF) and transforming growth factor-beta (TGF-β).
MicroRNA-200c represses migration and invasion of breast cancer cells by targeting actin-regulatory proteins FHOD1 and PPM1F.	/pubmed/22144583	Jurmeister S, Baumann M, Balwierz A, Keklikoglou I, Ward A, Uhlmann S, Zhang JD, Wiemann S, Sahin ’_.	MicroRNA-200c (miR-200c), ZEB1/ZEB2, E-cadherin, transforming growth factor β (TGF-β), FHOD1 and PPM1F,
Cyclooxygenase-2 and Akt mediate multiple growth-factor-induced epithelial-mesenchymal transition in human hepatocellular carcinoma.	/pubmed/22097969	Ogunwobi OO, Wang T, Zhang L, Liu C.	Transforming-growth-factor-β-1-, epidermal-growth-factor-, hepatocyte-growth-factor- and basic-fibroblast-growth-factor, E-cadherin, albumin, α-1 anti-trypsin, vimentin, collagen I and fibronectin, COX-2, prostaglandin E2 (PGE2), Akt and phosphorylated Akt.
15-Hydroxyprostaglandin dehydrogenase associates with poor prognosis in breast cancer, induces epithelial-mesenchymal transition, and promotes cell migration in cultured breast cancer cells.	/pubmed/22072156	Lehtinen L, Vainio P, Wikman H, Reemts J, Hilvo M, Issa R, Pollari S, Brandt B, Oresic M, Pantel K, Kallioniemi O, Iljin K.	15-hydroxyprostaglandin dehydrogenase (HPGD), transforming growth factor-β
The transcription factors Snail and Slug activate the transforming growth factor-beta signaling pathway in breast cancer.	/pubmed/22028892	Dhasarathy A, Phadke D, Mav D, Shah RR, Wade PA.	TGF-beta, Snail, Slug, transforming growth factor beta-receptor II (TGFBR2)
Identifying inhibitors of epithelial-mesenchymal transition by connectivity map-based systems approach.	/pubmed/21964532	Reka AK, Kuick R, Kurapati H, Standiford TJ, Omenn GS, Keshamouni VG.	TGF-β , E-cadherin, Smad
BRAF and RAS oncogenes regulate Rho GTPase pathways to mediate migration and invasion properties in human colon cancer cells: a comparative study.	/pubmed/21943101	Makrodouli E, Oikonomou E, Koc M, Andera L, Sasazuki T, Shirasawa S, Pintzas A.	RhoA, MEK-ERK, PI3K, Cdc42 , Rac1, BRAF, KRAS, TGFβ-1
Snail involves in the transforming growth factor Ô_1-mediated epithelial-mesenchymal transition of retinal pigment epithelial cells.	/pubmed/21853110	Li H, Wang H, Wang F, Gu Q, Xu X.	Transforming growth factor beta(TGF-β)-1, E-cadherin and Zona occludin-1(ZO-1), fibronectin and α-smooth muscle actin (α-SMA), Snail
Role of the focal adhesion protein kindlin-1 in breast cancer growth and lung metastasis.	/pubmed/21832234	Sin S, Bonin F, Petit V, Meseure D, Lallemand F, Bi’åche I, Bellahc’åne A, Castronovo V, de Wever O, Gespach C, Lidereau R, Driouch K.	Fermitin family member 1 (FERMT1, Kindlin-1), ransforming growth factor beta (TGFβ)
Engagement of I-branching {beta}-1, 6-N-acetylglucosaminyltransferase 2 in breast cancer metastasis and TGF-{beta} signaling.	/pubmed/21750175	Zhang H, Meng F, Wu S, Kreike B, Sethi S, Chen W, Miller FR, Wu G.	I-branching {beta}-1, 6-N-acetylglucosaminyltransferase 2 (GCNT2), TGF-β
Ribosomal protein S6 kinase (RSK)-2 as a central effector molecule in RON receptor tyrosine kinase mediated epithelial to mesenchymal transition induced by macrophage-stimulating protein.	/pubmed/21619683	Ma Q, Guin S, Padhye SS, Zhou YQ, Zhang RW, Wang MH.	Ribosomal protein S6 kinase (RSK)-2, RON receptor tyrosine kinase, Erk1/2 , TGF)-β1,
Differential roles of Src in transforming growth factor-’™ regulation of growth arrest, epithelial-to-mesenchymal transition and cell migration in pancreatic ductal adenocarcinoma cells.	/pubmed/21225226	Ungefroren H, Sebens S, Groth S, Gieseler F, F’_ndrich F.	Src, TGF-ß1, E-cadherin, ALK5, Smad2, Smad3, p38 MAPK
Klotho inhibits transforming growth factor-beta1 (TGF-beta1) signaling and suppresses renal fibrosis and cancer metastasis in mice.	/pubmed/21209102	Doi S, Zou Y, Togao O, Pastor JV, John GB, Wang L, Shiizaki K, Gotschall R, Schiavi S, Yorioka N, Takahashi M, Boothman DA, Kuro-o M.	Klotho, type-II TGF-β receptor, TGF-β1, Wnt and IGF-1
Peroxisome proliferator-activated receptor-gamma activation inhibits tumor metastasis by antagonizing Smad3-mediated epithelial-mesenchymal transition.	/pubmed/21159608	Reka AK, Kurapati H, Narala VR, Bommer G, Chen J, Standiford TJ, Keshamouni VG.	peroxisome proliferator-activated receptor γ (PPAR-γ), transforming growth factor β (TGF-β), Smad3, E-cadherin, vimentin, N-cadherin, fibronectin, matrix metalloproteases.
Differing contributions of LIMK and ROCK to TGFÔ_-induced transcription, motility and invasion.	/pubmed/21074289	Morin P, Wickman G, Munro J, Inman GJ, Olson MF.	LIMK, ROCK, TGFβ, SMAD, Rho
The catalytic class I(A) PI3K isoforms play divergent roles in breast cancer cell migration.	/pubmed/21056654	De Laurentiis A, Pardo OE, Palamidessi A, Jackson SP, Schoenwaelder SM, Reichmann E, Scita G, Arcaro A.	Ras (EpRas), TGFβ1, PI3K isoform p110α and p110β, Akt, Rac, Cdc42, ribosomal protein S6 kinase (S6K)
miR-21 and miR-31 converge on TIAM1 to regulate migration and invasion of colon carcinoma cells.	/pubmed/20826792	Cottonham CL, Kaneko S, Xu L.	miR-21, miR-31, TGF-β/TNF-α, TIAM1 (a guanidine exchange factor of the Rac GTPase)
TGF-beta1 causes epithelial-mesenchymal transition in HaCaT derivatives, but induces expression of COX-2 and migration only in benign, not in malignant keratinocytes.	/pubmed/20399617	R’_s’_nen K, Vaheri A.	ZO-1, E-cadherin, TGF-beta1, COX-2
Inhibitory effect of a TGFbeta receptor type-I inhibitor, Ki26894, on invasiveness of scirrhous gastric cancer cells.	/pubmed/20145621	Shinto O, Yashiro M, Kawajiri H, Shimizu K, Shimizu T, Miwa A, Hirakawa K.	TbetaR-I, TbetaR-II, phospho-Smad2, RhoA, myosin ZO-2, E-cadherin
14-3-3zeta Cooperates with ErbB2 to promote ductal carcinoma in situ progression to invasive breast cancer by inducing epithelial-mesenchymal transition.	/pubmed/19732720	Lu J, Guo H, Treekitkarnmongkol W, Li P, Zhang J, Shi B, Ling C, Zhou X, Chen T, Chiao PJ, Feng X, Seewaldt VL, Muller WJ, Sahin A, Hung MC, Yu D.	ErbB2, 14-3-3zeta, TGF-beta, Smads, ZFHX1B/SIP-1, E-cadherin
Inhibition of TGF-beta receptor I by siRNA suppresses the motility and invasiveness of T24 bladder cancer cells via modulation of integrins and matrix metalloproteinase.	/pubmed/19669587	Li Y, Yang K, Mao Q, Zheng X, Kong D, Xie L.	TGF-beta1, alpha3, beta1 and alpha2 integrin subunits, matrix metalloproteinase 9
A developmentally regulated inducer of EMT, LBX1, contributes to breast cancer progression.	/pubmed/19651985	Yu M, Smolen GA, Zhang J, Wittner B, Schott BJ, Brachtel E, Ramaswamy S, Maheswaran S, Haber DA.	Ladybird homeobox 1 (LBX1), ZEB1, ZEB2, Snail1, transforming growth factor beta2 (TGFB2). CD44(high)/CD24(low) cells, estrogen receptor (ER)/progesterone (PR)/HER2
Zyxin mediates actin fiber reorganization in epithelial-mesenchymal transition and contributes to endocardial morphogenesis.	/pubmed/19439447	Mori M, Nakagami H, Koibuchi N, Miura K, Takami Y, Koriyama H, Hayashi H, Sabe H, Mochizuki N, Morishita R, Kaneda Y.	adhesion-associated LIM protein, TGF-beta1, zyxin, Twist1.
Thyroid hormone receptor beta1 acts as a potent suppressor of tumor invasiveness and metastasis.	/pubmed/19147563	Mart’_nez-Iglesias O, Garcia-Silva S, Tenbaum SP, Regadera J, Larcher F, Paramio JM, Vennstr’_m B, Aranda A.	TRbeta1, epidermal growth factor, insulin-like growth factor-I, and transforming growth factor beta, extracellular signal-regulated kinase and phosphatidylinositol 3-kinase
ILEI requires oncogenic Ras for the epithelial to mesenchymal transition of hepatocytes and liver carcinoma progression.	/pubmed/19015638	Lahsnig C, Mikula M, Petz M, Zulehner G, Schneller D, van Zijl F, Huber H, Csiszar A, Beug H, Mikulits W.	Ras, transforming growth factor (TGF)-beta, interleukin-related protein interleukin-like EMT inducer (ILEI), E-cadherin, ZO-1, alpha-smooth muscle actin, platelet-derived growth factor (PDGF)/PDGF-R, beta-catenin, pY-Stat3, PI3K
MicroRNA-155 is regulated by the transforming growth factor beta/Smad pathway and contributes to epithelial cell plasticity by targeting RhoA.	/pubmed/18794355	Kong W, Yang H, He L, Zhao JJ, Coppola D, Dalton WS, Cheng JQ.	MicroRNA-155, transforming growth factor beta, Smad, RhoA
Keratin down-regulation in vimentin-positive cancer cells is reversible by vimentin RNA interference, which inhibits growth and motility.	/pubmed/18790770	Paccione RJ, Miyazaki H, Patel V, Waseem A, Gutkind JS, Zehner ZE, Yeudall WA.	none
The miR-200 family inhibits epithelial-mesenchymal transition and cancer cell migration by direct targeting of E-cadherin transcriptional repressors ZEB1 and ZEB2.	/pubmed/18411277	Korpal M, Lee ES, Hu G, Kang Y.	miR-200, E-cadherin, ZEB1 and ZEB2
The Spemann organizer gene, Goosecoid, promotes tumor metastasis.	/pubmed/17142318	Hartwell KA, Muir B, Reinhardt F, Carpenter AE, Sgroi DC, Weinberg RA.	Goosecoid, TGF-beta
A crucial function of PDGF in TGF-beta-mediated cancer progression of hepatocytes.	/pubmed/16607286	Gotzmann J, Fischer AN, Zojer M, Mikula M, Proell V, Huber H, Jechlinger M, Waerner T, Weith A, Beug H, Mikulits W.	TGF-beta, Smads, E-cadherin , Snail, platelet-derived growth factor (PDGF)-A ligand, both PDGF receptor subunits
Microarray analysis of gene expression during epithelial-mesenchymal transformation.	/pubmed/16010672	LaGamba D, Nawshad A, Hay ED.	TGF-beta/Smad, LEF-1.

## Sheet: TGFa.MC
TGFa
Title	URL	Description	Gene(s)
Targeting slug-mediated non-canonical activation of c-Met to overcome chemo-resistance in metastatic ovarian cancer cells.	/pubmed/31193822	Chang L, Hu Y, Fu Y, Zhou T, You J, Du J, Zheng L, Cao J, Ying M, Dai X, Su D, He Q, Zhu H, Yang B.	slug, c-Met, fibronectin, integrin α V, p-Met
Role of RUNX2 transcription factor in epithelial mesenchymal transition in non-small cell lung cancer lung cancer: Epigenetic control of the RUNX2 P1 promoter.	/pubmed/31109257	Herre’±o AM, Ram’_rez AC, Chaparro VP, Fernandez MJ, Ca’±as A, Morantes CF, Moreno OM, Brug’©s RE, Mej’_a JA, Bustos FJ, Montecino M, Rojas AP.	UNX2, RUNX2/ p57, H3K27Ac, WDR5, MLL2, MLL4, transforming growth factor-β, VIMENTIN, TWIST1, and SNAIL1
NDRG2 Regulates the Expression of Genes Involved in Epithelial Mesenchymal Transition of Prostate Cancer Cells.	/pubmed/30936598	Moradi Monfared M, Alizadeh Zarei M, Rafiei Dehbidi G, Behzad Behbahani A, Arabsolghar R, Takhshid MA.	NDRG2, TGF-β, VEGF, Slug, Snail, E-CAD
Resveratrol Inhibits the Migration and Metastasis of MDA-MB-231 Human Breast Cancer by Reversing TGF-Ô_1-Induced Epithelial-Mesenchymal Transition.	/pubmed/30901941	Sun Y, Zhou QM, Lu YY, Zhang H, Chen QL, Zhao M, Su SB.	transforming growth factor (TGF)-β1, matrix metalloproteinase (MMP)-2 and MMP-9, E-cadherin and vimentin, Fibronectin, α-SMA, P-PI3K, P-AKT, Smad2, Smad3, P-Smad2, P-Smad3, vimentin, Snail1, and Slug
Epithelial to Mesenchymal Transition in Human Mesothelial Cells Exposed to Asbestos Fibers: Role of TGF-Ô_ as Mediator of Malignant Mesothelioma Development or Metastasis via EMT Event.	/pubmed/30609805	Turini S, Bergandi L, Gazzano E, Prato M, Aldieri E.	Transforming Growth Factor β (TGF-β), E-cadherin, β-catenin, and occludin, fibronectin, α-SMA, and vimentin, Small Mother Against Decapentaplegic (SMAD), Zinc finger protein SNAI1 (SNAIL-1), Twist-related protein (Twist), and Zinc Finger E-Box Binding Homeobox 1 (ZEB-1)
Epithelial-mesenchymal transition via transforming growth factor beta in pancreatic cancer is potentiated by the inflammatory glycoprotein leucine-rich alpha-2 glycoprotein.	/pubmed/30575211	Otsuru T, Kobayashi S, Wada H, Takahashi T, Gotoh K, Iwagami Y, Yamada D, Noda T, Asaoka T, Serada S, Fujimoto M, Eguchi H, Mori M, Doki Y, Naka T.	TGF-β, Smad, E-cadherin
Effect of gap junction-mediated intercellular communication on TGF-Ô_Î¾induced epithelial-to-mesenchymal transition.	/pubmed/30545634	Fukuda S, Akiyama M, Harada H, Nakahama KI.	leucine-rich alpha-2 glycoprotein (LRG), transforming growth factor (TGF)-β1, Smad
The Tumor Suppressor SASH1 Interacts With the Signal Adaptor CRKL to Inhibit Epithelial-Mesenchymal Transition and Metastasis in Colorectal Cancer.	/pubmed/30480076	Franke FC, M’_ller J, Abal M, Medina ED, Nitsche U, Weidmann H, Chardonnet S, Ninio E, Janssen KP.	SASH1, CRKL, SRC kinase
TGF-Ô_1-SOX9 axis-inducible COL10A1 promotes invasion and metastasis in gastric cancer via epithelial-to-mesenchymal transition.	/pubmed/30154451	Li T, Huang H, Shi G, Zhao L, Li T, Zhang Z, Liu R, Hu Y, Liu H, Yu J, Li G.	ollagen type X alpha 1 (COL10A1), SOX9, transforming growth factor-β1 (TGF-β1)
Inhibin B suppresses anoikis resistance and migration through the transforming growth factor-Ô_ signaling pathway in nasopharyngeal carcinoma.	/pubmed/30151927	Zou G, Ren B, Liu Y, Fu Y, Chen P, Li X, Luo S, He J, Gao G, Zeng Z, Xiong W, Li G, Huang Y, Xu K, Zhang W.	Inhibin B (INHBB), transforming growth factor-β (TGF-β), vimentin, matrix metallopeptidase-9, and vascular endothelial growth factor A, E-cadherin, Smad2/3
Oncolytic Adenovirus rAd.DCN Inhibits Breast Tumor Growth and Lung Metastasis in an Immune-Competent Orthotopic Xenograft Model.	/pubmed/30032645	Zhao H, Wang H, Kong F, Xu W, Wang T, Xiao F, Wang L, Huang D, Seth P, Yang Y, Wang H.	transforming growth factor β, interleukin (IL)-2, IL-12, tumor necrosis factor α, and decreased Th2 cytokines, transforming growth factor β and IL-6.
Simultaneous stimulation with tumor necrosis factor-Ô± and transforming growth factor-Ô_1 induces epithelial-mesenchymal transition in colon cancer cells via the NF-Ô_B pathway.	/pubmed/29725419	Li Y, Zhu G, Zhai H, Jia J, Yang W, Li X, Liu L.	TNF-α, TGF-β1, E-cadherin, N-cadherin, vimentin, NF-κB kinase subunit β
Novel microtubule inhibitor MPT0B098 inhibits hypoxia-induced epithelial-to-mesenchymal transition in head and neck squamous cell carcinoma.	/pubmed/29592811	Tsai IT, Kuo CC, Liou JP, Chang JY.	HIF-1α, vimentin, N-cadherin, Twist, SNAI2, Slug, F-actin, transforming growth factor(TGF)-β, Smad2/3
PHD3 Controls Lung Cancer Metastasis and Resistance to EGFR Inhibitors through TGFÔ±.	/pubmed/29339541	Dopeso H, Jiao HK, Cuesta AM, Henze AT, Jurida L, Kracht M, Acker-Palmer A, Garvalov BK, Acker T.	oxygen sensor PHD3, TGFβ, HIF, EGFR, TGFα. SMAD
A novel mechanism of neovascularization in peritoneal dissemination via cancer-associated mesothelial cells affected by TGF-Ô_ derived from ovarian cancer.	/pubmed/29192324	Fujikake K, Kajiyama H, Yoshihara M, Nishino K, Yoshikawa N, Utsumi F, Suzuki S, Niimi K, Sakata J, Mitsui H, Shibata K, Senga T, Kikkawa F.	vascular endothelial growth factor (VEGF), TGF-β, α-SMA
Transforming growth factor Ô_1 promotes migration and invasion in HepG2 cells: EpithelialŠ—•toŠ—•mesenchymal transition via JAK/STAT3 signaling.	/pubmed/29115395	Lin XL, Liu M, Liu Y, Hu H, Pan Y, Zou W, Fan X, Hu X.	TGFβ1, JAK, STAT3
E26 Transformation-Specific Transcription Factor ETS2 as an Oncogene Promotes the Progression of Hypopharyngeal Cancer.	/pubmed/29111780	Liu X, Zhang C, Zhang Z, Zhang Z, Ji W, Cao S, Cai X, Lei D, Pan X.	ETS2, caspase-3, transforming growth factor-β, E-cadherin, zona occludens protein-1, vimentin and α-sooth muscle actin
FUT8 promotes breast cancer cell invasiveness by remodeling TGF-Ô_ receptor core fucosylation.	/pubmed/28982386	Tu CF, Wu MY, Lin YC, Kannagi R, Yang RB.	FUT8, TGF-β
TGF-Ô_ Stimulation of EMT Programs Elicits Non-genomic ER-Ô± Activity and Anti-estrogen Resistance in Breast Cancer Cells.	/pubmed/28955730	Tian M, Schiemann WP.	TGF-β, ER-α, EGFR, IGF1R, Src, EGF, IGF-1, estrogen, MAPKs; the receptors for TGF-β, EGF, and IGF-1,
A20 promotes metastasis of aggressive basal-like breast cancers through multi-monoubiquitylation ofÎ¾Snail1.	/pubmed/28892081	Lee JH, Jung SM, Yang KM, Bae E, Ahn SG, Park JS, Seo D, Kim M, Ha J, Lee J, Kim JH, Kim JH, Ooshima A, Park J, Shin D, Lee YS, Lee S, van Loo G, Jeong J, Kim SJ, Park SH.	ubiquitin-editing enzyme A20, Snail1, TGF-β1 1, glycogen synthase kinase 3β (GSK3β),
ITGA1 is a pre-malignant biomarker that promotes therapy resistance and metastatic potential in pancreatic cancer.	/pubmed/28855593	Gharibi A, La Kim S, Molnar J, Brambilla D, Adamian Y, Hoover M, Hong J, Lin J, Wolfenden L, Kelber JA.	integrin alpha 1 (ITGA1), TGFβ, collagen
The interleukin-like epithelial-mesenchymal transition inducer ILEI exhibits a non-interleukin-like fold and is active as a domain-swapped dimer.	/pubmed/28751379	Jansson AM, Csiszar A, Maier J, Nystr’_m AC, Ax E, Johansson P, Schiavone LH.	FAM3C interleukin-like epithelial-to-mesenchymal-transition (EMT) inducer (ILEI), γ-secretase presenilin 1 subunit (PS1), TGF-β, TGF-β receptor 1
Single factors alone can induce mesenchymal-like morphology, but not promote full EMT in breast cancer cell lines with different hormone statuses.	/pubmed/28734865	Tveitar’Çs MK, Reigstad I, Leiss L, Reed RK, Stuhr L.	TGF-β1, Jagged-1, E-cadherin
Runx2-I is an Early Regulator of Epithelial-Mesenchymal Cell Transition in the Chick Embryo.	/pubmed/28631378	Tavares ALP, Brown JA, Ulrich EC, Dvorak K, Runyan RB.	RUNX2-I, Transforming growth factor beta 2 (TGFβ2), Snai2
MALAT1 Modulates TGF-Ô_1-Induced Endothelial-to-Mesenchymal Transition through Downregulation of miR-145.	/pubmed/28535533	Xiang Y, Zhang Y, Tang Y, Li Q.	TGF-β1, MALAT1, miR-145, TGFBR2 and SMAD3
RCCD1 depletion attenuates TGF-Ô_-induced EMT and cell migration byÎ¾stabilizing cytoskeletal microtubules in NSCLC cells.	/pubmed/28455245	Wu J, He Z, Yang XM, Li KL, Wang DL, Sun FL.	TGF-β, RCC1 domain-containing protein 1 (RCCD1), JMJD5. Occludin, Vimentin and Snail),
Gambogic acid suppresses cancer invasion and migration by inhibiting TGFÔ_1-induced epithelial-to-mesenchymal transition.	/pubmed/28404892	Zhao K, Zhang S, Song X, Yao Y, Zhou Y, You Q, Guo Q, Lu N.	transforming growth factor β1 (TGFβ1), E-cadherin, N-cadherin, vimentin, TWIST1. NF-κB, tumor necrosis factor α
The mechanism of epithelial-mesenchymal transition induced by TGF-Ô_1 in neuroblastoma cells.	/pubmed/28393230	Shao JB, Gao ZM, Huang WY, Lu ZB.	transforming growth factor (TGF)-β1, E-cadherin, α-SMA, Smad2/3, glioblastoma transcription factor (Gli) 1/2, GANT61,
Effect of a hypoxic microenvironment after radiofrequency ablation on residual hepatocellular cell migration and invasion.	/pubmed/28182306	Tong Y, Yang H, Xu X, Ruan J, Liang M, Wu J, Luo B.	hypoxia inducible factor (HIF)-1α
Selumetinib Inhibits Melanoma Metastasis to Mouse Liver via Suppression of EMT-targeted Genes.	/pubmed/28179307	Ryu SH, Heo SH, Park EY, Choi KC, Ryu JW, Lee SH, Lee SW.	c-Myc, integrin alpha-5 (ITGA5), jagged 1 (JAG1), zinc finger E-box-binding homeobox 1 (ZEB1), NOTCH,
Fam3c modulates osteogenic differentiation by down-regulating Runx2.	/pubmed/27914282	Bendre A, B’_ki KG, M’_’_tt’_ JA.	Fam3c, alkaline phosphatase, Runx2, TGF-β1
A regulatory loop involving miR-29c and Sp1 elevates the TGF-Ô_1 mediated epithelial-to-mesenchymal transition in lung cancer.	/pubmed/27829234	Zhang HW, Wang EW, Li LX, Yi SH, Li LC, Xu FL, Wang DL, Wu YZ, Nian WQ.	Specificity protein1 (Sp1), TGF-β, microRNA-29c (miR-29c), thyroid transcription factor 1 (TTF-1), E-cadherin, vimentin, α-smooth muscle actin (α-SMA),
Epithelial-mesenchymal transition induction is associated with augmented glucose uptake and lactate production in pancreatic ductal adenocarcinoma.	/pubmed/27777765	Liu M, Quek LE, Sultani G, Turner N.	tumor necrosis factor-α and transforming growth factor-β
Estrogen-related receptor Ô± participates transforming growth factor-Ô_ (TGF-Ô_) induced epithelial-mesenchymal transition of osteosarcoma cells.	/pubmed/27532429	Chen Y, Zhang K, Li Y, He Q.	transforming growth factor-β (TGF-β), E-cadherin (E-Cad), Vimentin, Snail, estrogen-related receptors α (ERRα),
Bidirectional cross talk between patient-derived melanoma and cancer-associated fibroblasts promotes invasion and proliferation.	/pubmed/27482935	Izar B, Joyce CE, Goff S, Cho NL, Shah PM, Sharma G, Li J, Ibrahim N, Gold J, Hodi FS, Garraway LA, Novina CD, Bertagnolli MM, Yoon CH.	none
Mesenchymal stem cells promote pancreatic adenocarcinoma cells invasion by transforming growth factor-Ô_1 induced epithelial-mesenchymal transition.	/pubmed/27191496	Zhou HS, Su XF, Fu XL, Wu GZ, Luo KL, Fang Z, Yu F, Liu H, Hu HJ, Chen LS, Cai B, Tian ZQ.	TNF-α, IFN-γ, transforming growth factor-β1 (TGF-β1).
Rhapontigenin inhibits TGF-Ô_-mediated epithelialŠ—•mesenchymal transition via the PI3K/AKT/mTOR pathway and is not associated with HIF-1Ô± degradation.	/pubmed/26986649	Yeh YH, Wang SW, Yeh YC, Hsiao HF, Li TK.	transforming growth factor β (TGF-β), rhapontigenin (Rha), PI3K/AKT/mTOR/GSK3β/β‑catenin, Snail and hypoxia-inducible factor 1α (HIF-1α)
Bufalin suppresses hepatocellular carcinoma invasion and metastasis by targeting HIF-1Ô± via the PI3K/AKT/mTOR pathway.	/pubmed/26958938	Wang H, Zhang C, Xu L, Zang K, Ning Z, Jiang F, Chi H, Zhu X, Meng Z.	HIF-1α, E-cadherin, N-cadherin, vimentin, Snail, Transforming growth factor-β1 (TGF-β1), PI3K/AKT/mTOR
AZGP1 suppresses epithelial-to-mesenchymal transition and hepatic carcinogenesis by blocking TGFÔ_1-ERK2 pathways.	/pubmed/26902423	Xu MY, Chen R, Yu JX, Liu T, Qu Y, Lu LG.	Zinc-α2-glycoprotein 1 (AZGP1), TGF-β1, ERK2
First trimester human placenta prevents breast cancer cell attachment to the matrix: The role of extracellular matrix.	/pubmed/26859229	Epstein Shochet G, Drucker L, Pomeranz M, Fishman A, Pasmanik-Chor M, Tartakover-Matalon S, Lishner M.	integrin, estrogen, EGFR, TGFβ, ERα, Smad3, JNK, integrin-α5, RGD
CX3CL1 increases invasiveness and metastasis by promoting epithelial-to-mesenchymal transition through the TACE/TGF-Ô±/EGFR pathway in hypoxic androgen-independent prostate cancer cells.	/pubmed/26718770	Tang J, Xiao L, Cui R, Li D, Zheng X, Zhu L, Sun H, Pan Y, Du Y, Yu X.	C-X3-C motif) ligand 1 (CX3CL1), epidermal growth factor receptor (EGFR), Slug, TGF-α, TACE, TGF-α,
Enhanced expression of polysialic acid correlates with malignant phenotype in breast cancer cell lines and clinical tissue samples.	/pubmed/26530860	Wang X, Li X, Zeng YN, He F, Yang XM, Guan F.	PSA, transforming growth factor-β1 (TGF-β1). polysialyltransferase ST8SiaIV (PST) and polysialyltransferase ST8SiaII (STX),
Breast cancer metastasis suppressor 1 (BRMS1) attenuates TGF-Ô_1-induced breast cancer cell aggressiveness through downregulating HIF-1Ô± expression.	/pubmed/26520789	Cho KH, Yu SL, Cho DY, Park CG, Lee HY.	BRMS1, TGF-β1, TWIST1, Snail, HIF-1α, nuclear factor kappaB (NF-κB).
Regulation of Gene Expression by Sodium Valproate in Epithelial-to-Mesenchymal Transition.	/pubmed/26286207	Noguchi S, Eitoku M, Moriya S, Kondo S, Kiyosawa H, Watanabe T, Suganuma N.	TGF-β1, histone H3K27, TGF-β1
Identification of Tyrosine-Phosphorylated Proteins Upregulated during Epithelial-Mesenchymal Transition Induced with TGF-Ô_.	/pubmed/26216473	Okayama A, Miyagi Y, Oshita F, Ito H, Nakayama H, Nishi M, Kurata Y, Kimura Y, Ryo A, Hirano H.	transforming growth factor-β (TGF-β), TNS1, hepatocyte growth factor receptor (c-Met), NT-3 growth factor receptor (TrkC) p
Co-culture of 3D tumor spheroids with fibroblasts as a model for epithelial-mesenchymal transition in vitro.	/pubmed/26022665	Kim SA, Lee EK, Kuh HJ.	fibronectin, laminin, type I collagen, α-SMA, EGFR, CTGF; β-catenin and E-cadherin
All-trans-retinoic Acid Modulates the Plasticity and Inhibits the Motility of Breast Cancer Cells: ROLE OF NOTCH1 AND TRANSFORMING GROWTH FACTOR (TGFÔ_).	/pubmed/26018078	Zanetti A, Affatato R, Centritto F, Fratelli M, Kurosaki M, Barzago MM, Bolis M, Terao M, Garattini E, Paroni G.	ERBB2, RARA, EGF, heregulin-β1, NOTCH1,
Endothelial-mesenchymal transition of brain endothelial cells: possible role during metastatic extravasation.	/pubmed/25822751	Krizbai IA, Gasparics ’, Nagy•szi P, Fazakas C, Moln’r J, Wilhelm I, Bencs R, Rosivall L, Sebe A.	TGF-β1, fibronectin, β1-integrin, calponin and α-smooth muscle actin (SMA), claudin-5
Deptor enhances triple-negative breast cancer metastasis and chemoresistance through coupling to survivin expression.	/pubmed/25810016	Parvani JG, Davuluri G, Wendt MK, Espinosa C, Tian M, Danielpour D, Sossey-Alaoui K, Schiemann WP.	Dep domain-containing mTOR-interacting protein (Deptor), TGF-β t
Endothelial-mesenchymal transition of brain endothelial cells: possible role during metastatic extravasation.	/pubmed/25742314	Krizbai IA, Gasparics ’, Nagy•szi P, Fazakas C, Moln’r J, Wilhelm I, Bencs R, Rosivall L, Sebe A.	TGF-β1, fibronectin, β1-integrin, calponin and α-smooth muscle actin (SMA), Claudin-5, Smad2 and Smad3.
[Role of transforming growth factor-Ô_1 in epithelial-mesenchymal transition of mesothelial cells and its effect on peritoneal metastasis of gastric cancer].	/pubmed/25656033	Lyu Z, Kong B, Liu X, Li F, Wang H, Xu H.	TGF-β1, α-SMA, vimentin, cytokeratin and E-cadherin, Smad2
Gd-metallofullerenol nanomaterial as non-toxic breast cancer stem cell-specific inhibitor.	/pubmed/25612916	Liu Y, Chen C, Qian P, Lu X, Sun B, Zhang X, Wang L, Gao X, Li H, Chen Z, Tang J, Zhang W, Dong J, Bai R, Lobie PE, Wu Q, Liu S, Zhang H, Zhao F, Wicha MS, Zhu T, Zhao Y.	TGF-β, HIF-1α
The ubiquitin ligase Siah is a novel regulator of Zeb1 in breast cancer.	/pubmed/25528765	Chen A, Wong CS, Liu MC, House CM, Sceneay J, Bowtell DD, Thompson EW, M’_ller A.	Siah ubiquitin ligases, Zeb1, Siah,
TGF-Ô_ induces global changes in DNA methylation during the epithelial-to-mesenchymal transition in ovarian cancer cells.	/pubmed/25470663	Cardenas H, Vieth E, Lee J, Segar M, Liu Y, Nephew KP, Matei D.	TGF-β, CDH1 (E-cadherin) and COL1A1 (collagen 1A1), DNA methyltransferases (DNMT) -1, -3A, and -3B,
Alteration of N-glycans and expression of their related glycogenes in the epithelial-mesenchymal transition of HCV29 bladder epithelial cells.	/pubmed/25470275	Guo J, Li X, Tan Z, Lu W, Yang G, Guan F.	N-glycan, glycogene, transforming growth factor-beta (TGFβ), glycogene man2a1, hybrid-type N-glycans, fuca1, fucosylated N-glycans .
Protein-bound polysaccharide K suppresses tumor fibrosis in gastric cancer by inhibiting the TGF-Ô_ signaling pathway.	/pubmed/25435013	Shinbo T, Fushida S, Tsukada T, Harada S, Kinoshita J, Oyama K, Okamoto K, Ninomiya I, Takamura H, Kitagawa H, Fujimura T, Yashiro M, Hirakawa K, Ohta T.	transforming growth factor β (TGF-β), polysaccharide K (PSK), Smad, α-SMA
Research on the efficacy of Celastrus Orbiculatus in suppressing TGF-Ô_1-induced epithelial-mesenchymal transition by inhibiting HSP27 and TNF-Ô±-induced NF-Ô_ B/Snail signaling pathway in human gastric adenocarcinoma.	/pubmed/25370696	Zhu Y, Liu Y, Qian Y, Dai X, Yang L, Chen J, Guo S, Hisamitsu T.	TGF-β1, E-cadherin, Vimentin, N-cadherin, HSP27, nuclear factor κB (NF-κB), Snail
PDGF receptor-Ô± promotes TGF-Ô_ signaling in hepatic stellate cells via transcriptional and posttranscriptional regulation of TGF-Ô_ receptors.	/pubmed/25169976	Liu C, Li J, Xiang X, Guo L, Tu K, Liu Q, Shah VH, Kang N.	Platelet-derived growth factor (PDGF), transforming growth factor-β (TGF-β), SMAD2, TGF-β receptor I (TβRI), TβRII
GD3 synthase regulates epithelial-mesenchymal transition and metastasis in breast cancer.	/pubmed/25109336	Sarkar TR, Battula VL, Werden SJ, Vijay GV, Ramirez-Pe’±a EQ, Taube JH, Chang JT, Miura N, Porter W, Sphyris N, Andreeff M, Mani SA.	ganglioside GD2, GD3 synthase (GD3S), Snail, Twist, transforming growth factor-β1, FOXC2
Inflammatory cytokines promote the retrodifferentiation of tumor-derived hepatocyte-like cells to progenitor cells.	/pubmed/25098666	Dubois-Pot-Schneider H, Fekir K, Coulouarn C, Glaise D, Aninat C, Jarnouen K, Le Gu’©vel R, Kubo T, Ishida S, Morel F, Corlu A.	transforming growth factor beta 1 (TGFβ1), tumor necrosis factor alpha [TNFα], interleukin 6 [IL6]).
The role of RhoC in epithelial-to-mesenchymal transition of ovarian carcinoma cells.	/pubmed/24986540	Gou WF, Zhao Y, Lu H, Yang XF, Xiu YL, Zhao S, Liu JM, Zhu ZT, Sun HZ, Liu YP, Xu F, Takano Y, Zheng HC.	TGF-β1R, VEGFR, N-cadherin, α-SMA, snail, Notch1, E-cadherin, RhoC, VEGF, TGF-β1.
MicroRNA-124 regulates TGF-Ô±-induced epithelial-mesenchymal transition in human prostate cancer cells.	/pubmed/24969691	Qin W, Pan Y, Zheng X, Li D, Bu J, Xu C, Tang J, Cui R, Lin P, Yu X.	TGF-α, E-cadherin, Vimentin, miR-124, Slug
Tumor necrosis factor-Ô± modulates epithelial mesenchymal transition mediators ZEB2 and S100A4 to promote cholangiocarcinoma progression.	/pubmed/24867797	Techasen A, Namwat N, Loilome W, Duangkumpha K, Puapairoj A, Saya H, Yongvanit P.	ZEB2, S100A4, TNF-α, transforming growth factor-β (TGF-β)
VDR status arbitrates the prometastatic effects of tumor-associated macrophages.	/pubmed/24821711	Zhang Y, Guo Q, Zhang Z, Bai N, Liu Z, Xiong M, Wei Y, Xiang R, Tan X.	vitamin D receptor (VDR), E-cadherin (CDH1), α-smooth muscle actin (α-SMA), TNFα, TGFβ, TNFα, β-catenin
The complex interplay between ERK1/2, TGFÔ_/Smad, and Jagged/Notch signaling pathways in the regulation of epithelial-mesenchymal transition in retinal pigment epithelium cells.	/pubmed/24788939	Chen X, Xiao W, Wang W, Luo L, Ye S, Liu Y.	ERK1/2, TGFβ/Smad, Jagged/Notch,
ERK1/2 pathway mediates epithelial-mesenchymal transition by cross-interacting with TGFÔ_/Smad and Jagged/Notch signaling pathways in lens epithelial cells.	/pubmed/24714800	Chen X, Ye S, Xiao W, Wang W, Luo L, Liu Y.	ERK1/2, transforming growth factor β2 (TGFβ2), Notch, TGFβ2, Smad2/3, MEK/ERK1/2, P-cadherin, α-SMA, collagen type IV, N-cadherin, fibronectin, ERK1/2, Jagged/Notch
Fibroblast growth factor receptor splice variants are stable markers of oncogenic transforming growth factor Ô_1 signaling in metastatic breast cancers.	/pubmed/24618085	Wendt MK, Taylor MA, Schiemann BJ, Sossey-Alaoui K, Schiemann WP.	E-cad, TGF-β1, FGFR1-β, FGFR1, FGFR1-α
JAK/STAT3 signaling is required for TGF-Ô_-induced epithelial-mesenchymal transition in lung cancer cells.	/pubmed/24573038	Liu RY, Zeng Y, Lei Z, Wang L, Yang H, Liu Z, Zhao J, Zhang HT.	IL-6, JAK, STAT3, TGF-β1, Smad3, E-cadherin, vimentin, Snail , Stat3, MMP2, PAI-1
Inflammatory cytokines induce a reduction in E-cadherin expression and morphological changes in MDCK cells.	/pubmed/24565002	Saito T, Yoshida K, Matsumoto K, Saeki K, Tanaka Y, Ong SM, Sasaki N, Nishimura R, Nakagawa T.	tumor necrosis factor alpha (TNF-α), interleukin 6 (IL-6), transforming growth factor beta (TGF-β), E-cadherin
Prostate apoptosis response-4 mediates TGF-Ô_-induced epithelial-to-mesenchymal transition.	/pubmed/24503536	Chaudhry P, Fabi F, Singh M, Parent S, Leblanc V, Asselin E.	TGF-β, Par-4 (prostate apoptosis response-4), Smad2, IκB-α, ALK5, phosphoinositide 3-kinase, NF-κB, Smad4, TGF-β3, Snail, vimentin, zinc-finger E-box binding homeobox 1, N-Cadherin, Claudin-1, E-Cadherin.
Treatment with the vascular disruptive agent OXi4503 induces an immediate and widespread epithelial to mesenchymal transition in the surviving tumor.	/pubmed/24403226	Fifis T, Nguyen L, Malcontenti-Wilson C, Chan LS, Nunes Costa PL, Daruwalla J, Nikfarjam M, Muralidharan V, Waltham M, Thompson EW, Christophi C.	E-cadherin, β-catenin, ZEB1, vimentin, hypoxia-inducible factor 1-alpha, hepatocyte growth factor, vascular endothelial growth factor and transforming growth factor-beta
Cancer-associated fibroblasts induce epithelial-mesenchymal transition of breast cancer cells through paracrine TGF-Ô_ signalling.	/pubmed/24335925	Yu Y, Xiao CH, Tan LD, Wang QS, Li XQ, Feng YM.	α-smooth muscle actin, SDF1/CXCL12, TGF-β1, Smad
Withaferin A inhibits experimental epithelial-mesenchymal transition in MCF-10A cells and suppresses vimentin protein level in vivo in breast tumors.	/pubmed/24293234	Lee J, Hahm ER, Marcus AI, Singh SV.	tumor necrosis factor-α (TNF-α), transforming growth factor-β1 (TGF-β), E-cadherin, vimentin
Fucosylated TGF-Ô_ receptors transduces a signal for epithelial-mesenchymal transition in colorectal cancer cells.	/pubmed/24253505	Hirakawa M, Takimoto R, Tamura F, Yoshida M, Ono M, Murase K, Sato Y, Osuga T, Sato T, Iyama S, Miyanishi K, Takada K, Hayashi T, Kobune M, Kato J.	TGF-β, fucosyltransferase (FUT) 3 and FUT6, type I TβR
Estrogen receptor alpha is expressed in mesenteric mesothelial cells and is internalized in caveolae upon Freund's adjuvant treatment.	/pubmed/24244516	Balogh P, Szab’_ A, Katz S, Lik’_ I, Pat’_cs A, Kiss AL.	interleukins IL-1alpha, -1beta, IL-6, transforming growth factor beta (TGF-β), estrogen receptor alpha (ER-α) , aveolin-1
Tumor-stromal interactions with direct cell contacts enhance motility of non-small cell lung cancer cells through the hedgehog signaling pathway.	/pubmed/24023301	Choe C, Shin YS, Kim SH, Jeon MJ, Choi SJ, Lee J, Kim J.	vimentin, smooth muscle actin (α-SMA), fibroblast activation protein (FAP), transforming growth factor-β (TGFβ), SMAD3, and hedgehog signaling effector GLI family zinc finger-1 (GLI1), Snail family zinc finger-1 (SNAI1) and SNAI2
NF-Ô_B regulates mesenchymal transition for the induction of non-small cell lung cancer initiating cells.	/pubmed/23935876	Kumar M, Allison DF, Baranova NN, Wamsley JJ, Katz AJ, Bekiranov S, Jones DR, Mayo MW.	tumor necrosis factor alpha (TNF), transforming growth factor beta (TGFβ), TWIST1, SNAI1/Snail1, SNAI2/Slug, ZEB2/Sip1, KLF4, SOX2, POU5F1/Oct4, MYCN, KIT, NF-κB,
Activation-induced cytidine deaminase (AID) is necessary for the epithelial-mesenchymal transition in mammary epithelial cells.	/pubmed/23882083	Mu’±oz DP, Lee EL, Takayama S, Copp’© JP, Heo SJ, Boffelli D, Di Noia JM, Martin DI.	none
Origin and function of myofibroblasts in kidney fibrosis.	/pubmed/23817022	LeBleu VS, Taduri G, O'Connell J, Teng Y, Cooke VG, Woda C, Sugimoto H, Kalluri R.	Tgfbr2, α-smooth muscle actin (αSMA)
Knockdown of N-acetylglucosaminyl transferase V ameliorates hepatotoxin-induced liver fibrosis in mice.	/pubmed/23798564	Liu J, Zhang Z, Tu X, Liu J, Zhang H, Zhang J, Zang Y, Zhu J, Chen J, Dong L, Zhang J.	N-acetyl glucosaminyltransferase V (GnT-V), transforming growth factor beta (TGF-β), Smad, platelet-derived growth factor (PDGF), Erk
Identification of integrin Ô±3 as a molecular marker of cells undergoing epithelial-mesenchymal transition and of cancer cells with aggressive phenotypes.	/pubmed/23786209	Shirakihara T, Kawasaki T, Fukagawa A, Semba K, Sakai R, Miyazono K, Miyazawa K, Saitoh M.	Transforming growth factor (TGF)-β, smooth muscle α actin, calponin, fibroblast growth factor-2, integrin α3 (ITGA3), Ret, δEF-1, MEK 1/2
Lipocalin-2 negatively modulates the epithelial-to-mesenchymal transition in hepatocellular carcinoma through the epidermal growth factor (TGF-beta1)/Lcn2/Twist1 pathway.	/pubmed/23696034	Wang YP, Yu GR, Lee MJ, Lee SY, Chu IS, Leem SH, Kim DG.	Lipocalin-2 (Lcn2), N-cadherin, vimentin, alpha-smooth muscle actin, fibronectin, CK8, CK18, desmoplakin I/II, Epidermal growth factor (EGF), transforming growth factor beta1 (TGF-β1), Twist1, Twist1, EGF,
Recruitment of normal stem cells to an oncogenic phenotype by noncontiguous carcinogen-transformed epithelia depends on the transforming carcinogen.	/pubmed/23687063	Xu Y, Tokar EJ, Person RJ, Orihuela RG, Ngalame NN, Waalkes MP.	metalloproteinase-9 (MMP-9), MMP-2, PTEN, VIM, SNAIL1, TWIST1, E-CAD, ABCG2, OCT-4, WNT-3
[Ô±-Enolase (ENO1) inhibits epithelial-mesenchymal transition in the A549 cell lineŠ—©by suppressing ERK1/2 phosphorylation].	/pubmed/23676977	Zhou X, Zhang Y, Han N, Guo S, Xiao T, Cheng S, Gao Y, Zhang K.	ENO1, TGFβ-1, EGF, ERK1/2, N-cadherin, vimentin, E-cadherin.
Endothelium-dependent epithelial-mesenchymal transition of tumor cells: exclusive roles of transforming growth factor Ô_1 and Ô_2.	/pubmed/23668958	Kimura C, Hayashi M, Mizuno Y, Oike M.	TGFβ1 and TGFβ2.
Enrichment map profiling of the cancer invasion front suggests regulation of colorectal cancer progression by the bone morphogenetic protein antagonist, gremlin-1.	/pubmed/23659962	Karagiannis GS, Berk A, Dimitromanolakis A, Diamandis EP.	BMP antagonist gremlin-1 (GREM1)
STAT3 mediates TGF-Ô_1-induced TWIST1 expression and prostate cancer invasion.	/pubmed/23623921	Cho KH, Jeong KJ, Shin SC, Kang J, Park CG, Lee HY.	TGF-β1, STAT3, HIF-1α, TWIST1
Angiotensin-converting enzyme 2 attenuates the metastasis of non-small cell lung cancer through inhibition of epithelial-mesenchymal transition.	/pubmed/23545945	Qian YR, Guo Y, Wan HY, Fan L, Feng Y, Ni L, Xiang Y, Li QY.	ACE2, E-cadherin, vimentin, TGF-β1, α-smooth muscle actin (αSMA)
Aberrant expression of microRNAs involved in epithelial-mesenchymal transition of HT-29 cell line.	/pubmed/23483606	Cai ZG, Zhang SM, Zhang H, Zhou YY, Wu HB, Xu XP.	TGF β, miR-21, miR-27, miR-22, miR-26, miR-30, miR-181, miR-200b, miR-200c and miR-214, N-cadherin, Vimentin, α-Sma, Twist1, E-cadherin.
Low-dose paclitaxel modulates tumour fibrosis in gastric cancer.	/pubmed/23443842	Tsukada T, Fushida S, Harada S, Terai S, Yagi Y, Kinoshita J, Oyama K, Tajima H, Ninomiya I, Fujimura T, Ohta T.	TGF-β, Smad, α-SMA, collagen I, Smad2
Connective tissue growth factor is overexpressed in human hepatocellular carcinoma and promotes cell invasion and growth.	/pubmed/23323010	Xiu M, Liu YH, Brigstock DR, He FH, Zhang RJ, Gao RP.	TGF-β1, CCN2
Hypoxia-inducing factors as master regulators of stemness properties and altered metabolism of cancer- and metastasis-initiating cells.	/pubmed/23301832	Mimeault M, Batra SK.	HIF-1α, HIF-2α, epidermal growth factor receptor (EGFR), insulin-like growth factor-1 receptor (IGF-1R), stem cell factor (SCF) receptor KIT, transforming growth factor-β receptors (TGF-βRs). Notch, phosphatidylinositol 3'-kinase (PI3K), Akt, Molecular target of rapamycin (mTOR), Oct-3/4, Nanog and Sox-2), CXC chemokine receptor 4 (CXCR4), snail, twist, vascular endothelial growth factor (VEGF).
Meta-analysis of gene expression signatures defining the epithelial to mesenchymal transition during cancer progression.	/pubmed/23251436	Gr’_ger CJ, Grubinger M, Waldh’_r T, Vierlinger K, Mikulits W.	transforming growth factor-β, tumor necrosis factor-α
Characterization and role of SCAI during renal fibrosis and epithelial-to-mesenchymal transition.	/pubmed/23178076	Fintha A, Gasparics ’, Fang L, Erdei Z, Hamar P, M’_zes MM, K’_k’©ny G, Rosivall L, Sebe A.	α-smooth muscle actin (SMA), transforming growth factor (TGF)-β1, myocardin-related transcription factor (MRTF), suppressor of cancer cell invasion (SCAI), RhoA, Rac1, Cdc42, connective tissue growth factor, calponin, E-cadherin
Hypoxia-induced secretion of TGF-Ô_1 in mesenchymal stem cell promotes breast cancer cell progression.	/pubmed/23067574	Hung SP, Yang MH, Tseng KF, Lee OK.	transforming growth factor-β1 (TGF-β1), HIF-1
TGF-Ô_ suppresses the expression of genes related to mitochondrial function in lung A549 cells.	/pubmed/23046869	Sohn EJ, Kim J, Hwang Y, Im S, Moon Y, Kang DM.	TGF-β, Peroxisome proliferator-activated receptor gamma co-activator 1-alpha (PGC-1 α), NRF-2, ERR-α, and PPAR-γ, super oxide dismutase 2, cytochrome C, MCAD
The T-box transcription factor Brachyury regulates epithelial-mesenchymal transition in association with cancer stem-like cells in adenoid cystic carcinoma cells.	/pubmed/22931165	Shimoda M, Sugiura T, Imajyo I, Ishii K, Chigita S, Seki K, Kobayashi Y, Shirasuna K.	Snail, Twist1, Twist2, Slug, Zeb1, Zeb2, Gsk3β, TGF-β2, Nodal, Lefty, Oct-4, Pax6, Rex1, Nanog, Sox2, Brachyury, and alpha fetoprotein [Afp]
Lack of transforming growth factor-Ô_ signaling promotes collective cancer cell invasion through tumor-stromal crosstalk.	/pubmed/22748014	Matise LA, Palmer TD, Ashby WJ, Nashabi A, Chytil A, Aakre M, Pickup MW, Gorska AE, Zijlstra A, Moses HL.	TGF-β, TβRIIfl/fl, α-smooth muscle actin, vimentin, E-cadherin+/p120+/β-catenin+, Igfbp4, Tspan13, Col1α2, Bmp7, Gng11, Vcan, Tmeff1, and Dsc2
Upregulation of N-acetylglucosaminyltransferase-V by heparin-binding EGF-like growth factor induces keratinocyte proliferation and epidermal hyperplasia.	/pubmed/22716246	Kimura A, Terao M, Kato A, Hanafusa T, Murota H, Katayama I, Miyoshi E.	N-acetylglucosaminyltransferase-V (GnT-V), Mgat5, EGF, transforming growth factor-β, N-glycans, phorbol ester 12-O-tetradecanoyl phorbol-13-acetate (TPA), heparin-binding EGF-like growth factor (HB-EGF)
Activation of Smad-mediated TGF-Ô_ signaling triggers epithelial-mesenchymal transitions in murine cloned corneal progenitor cells.	/pubmed/22674610	Kawakita T, Espana EM, Higa K, Kato N, Li W, Tseng SC.	E-cadherin, β-catenin, LEF-1, K14 keratin, p63, PCNA, α-SMA, S100A4; Smad4, TGF-β1, TGF-β2, GM-CSF, IL-1α, TGF-β1
The role of human peritoneal mesothelial cells in the fibrosis and progression of gastric cancer.	/pubmed/22614335	Tsukada T, Fushida S, Harada S, Yagi Y, Kinoshita J, Oyama K, Tajima H, Fujita H, Ninomiya I, Fujimura T, Ohta T.	TGF-β, E-cadherin, α-SMA.
A dual role for hypoxia inducible factor-1Ô± in the hepatitis C virus lifecycle and hepatoma migration.	/pubmed/22178269	Wilson GK, Brimacombe CL, Rowe IA, Reynolds GM, Fletcher NF, Stamataki Z, Bhogal RH, Sim’µes ML, Ashcroft M, Afford SC, Mitry RR, Dhawan A, Mee CJ, H’_bscher SG, Balfe P, McKeating JA.	Snail, Twist, HIF-1α, VEGF, TGF-β
TGF-Ô_-induced epithelial-mesenchymal transition of A549 lung adenocarcinoma cells is enhanced by pro-inflammatory cytokines derived from RAW 264.7 macrophage cells.	/pubmed/22161143	Kawata M, Koinuma D, Ogami T, Umezawa K, Iwata C, Watabe T, Miyazono K.	TGF-β, TNF-α, IL-1β. NFκB, N-cadherin
Regulation of breast cancer metastasis by Runx2 and estrogen signaling: the role of SNAI2.	/pubmed/22151997	Chimge NO, Baniwal SK, Little GH, Chen YB, Kahn M, Tripathy D, Borok Z, Frenkel B.	Runx2, E-cadherin, vimentin, SNAI2, WNT, TGFβ, ERα.
TGFÔ_-induced c-Myb affects the expression of EMT-associated genes and promotes invasion of ER+ breast cancer cells.	/pubmed/22101269	Cesi V, Casciati A, Sesti F, Tanno B, Calabretta B, Raschell’¾ G.	TGFβ, c-Myb, miR200b, miR200c, miR429, Slug (SNAI2), Bcl-2, E-cadherin
Cyclooxygenase-2 and Akt mediate multiple growth-factor-induced epithelial-mesenchymal transition in human hepatocellular carcinoma.	/pubmed/22097969	Ogunwobi OO, Wang T, Zhang L, Liu C.	TGFβ-1, EGF, HGF, bFGF, E-cadherin, albumin, α-1 anti-trypsin, vimentin, collagen I, fibronectin, COX-2, prostaglandin E2 (PGE2), Akt, pAkt.
Heterogeneity in MYC-induced mammary tumors contributes to escape from oncogene dependence.	/pubmed/21996730	Leung JY, Andrechek ER, Cardiff RD, Nevins JR.	Myc
Snail involves in the transforming growth factor Ô_1-mediated epithelial-mesenchymal transition of retinal pigment epithelial cells.	/pubmed/21853110	Li H, Wang H, Wang F, Gu Q, Xu X.	TGF-β-1, E-cadherin, ZO-1, fibronectin, α-SMA, Snail
Cross-regulation between protein L-isoaspartyl O-methyltransferase and ERK in epithelial mesenchymal transition of MDA-MB-231 cells.	/pubmed/21841813	Ryu J, Song J, Heo J, Jung Y, Lee SJ, Hong S, Cho JY.	PIMT, integrin αv, Snail, Slug, MMP-2, ERK1/2, TGF-β, TNF-α
Downregulation of transcription factor Oct4 induces an epithelial-to-mesenchymal transition via enhancement of Ca2+ influx in breast cancer cells.	/pubmed/21798248	Hu J, Qin K, Zhang Y, Gong J, Li N, Lv D, Xiang R, Tan X.	E-cadherin, α-SMA, Oct4, TGF-β1, STIM1, Orai1
Transforming Growth Factor-Ô_1 (TGF-Ô_1) Driven Epithelial to Mesenchymal Transition (EMT) is Accentuated by Tumour Necrosis Factor Ô± (TNFÔ±) via Crosstalk Between the SMAD and NF-Ô_B Pathways.	/pubmed/21792635	Borthwick LA, Gardner A, De Soyza A, Mann DA, Fisher AJ.	TGF-β1, TNFα, SMAD, MAPK, NF-κB, SMAD 2/3, IKKβ
Human peritoneal mesothelial cell transformation into myofibroblasts in response to TGF-’™1 in vitro.	/pubmed/21152863	Lv ZD, Na D, Ma XY, Zhao C, Zhao WJ, Xu HM.	TGF-ß1, Smad2, α-SMA, vimentin, Cytokeratin, E-cadherin
FMNL2 enhances invasion of colorectal carcinoma by inducing epithelial-mesenchymal transition.	/pubmed/21071512	Li Y, Zhu X, Zeng Y, Wang J, Zhang X, Ding YQ, Liang L.	FMNL2, vimentin, E-cadherin, α-catenin, γ-catenin, snail, slug, Smad3, TGF-β, p-MAPK, p-MEK
Evaluation of molecular markers of mesenchymal phenotype in melanoma.	/pubmed/20856146	Mikesh LM, Kumar M, Erdag G, Hogan KT, Molhoek KR, Mayo MW, Slingluff CL Jr.	TGF-β, TNF-α, E-cadherin, N-cadherin, vimentin, fibronectin, Snail
miR-21 and miR-31 converge on TIAM1 to regulate migration and invasion of colon carcinoma cells.	/pubmed/20826792	Cottonham CL, Kaneko S, Xu L.	TGF-β, TNF-α, miR-21, miR-31, TIAM1, Rac
Na,K-ATPase subunits as markers for epithelial-mesenchymal transition in cancer and fibrosis.	/pubmed/20501797	Rajasekaran SA, Huynh TP, Wolle DG, Espineda CE, Inge LJ, Skay A, Lassman C, Nicholas SB, Harper JF, Reeves AE, Ahmed MM, Leatherman JM, Mullin JM, Rajasekaran AK.	TGF-beta, Na,K-ATPase
Combined proteasome and histone deacetylase inhibition attenuates epithelial-mesenchymal transition through E-cadherin in esophageal cancer cells.	/pubmed/20412959	Taylor MD, Liu Y, Nagji AS, Theodosakis N, Jones DR.	E-cadherin
NF-kappaB activation, dependent on acetylation/deacetylation, contributes to HIF-1 activity and migration of bone metastatic breast carcinoma cells.	/pubmed/19671685	Bendinelli P, Matteucci E, Maroni P, Desiderio MA.	E-cadherins, N-cadherins, vimentin, NF-kappaB, HIF-1, c-Jun, p50/p65, TGr-beta1, Twist, c-Src
Integrative genomic analyses of ZEB2: Transcriptional regulation of ZEB2 based on SMADs, ETS1, HIF1alpha, POU/OCT, and NF-kappaB.	/pubmed/19424592	Katoh M, Katoh M.	SNAI1, Snail, ZEB1, deltaEF1, ZFHX1A, ZEB2, SIP1, ZFHX1B, TWIST1/TWIST, and TWIST2/DERMO1, CDH1, CLDN4, CCND1, TERT, SFRP1, ALPL, miR-200b-200a-429, TGFbeta, TNFalpha, IL1, AKT, POU3F2 (BRN2), POU3F3 (BRN1), Smad
Activation of a prometastatic gene expression program in hypoxic neuroblastoma cells.	/pubmed/19423615	Poomthavorn P, Wong SH, Higgins S, Werther GA, Russo VC.	HIF1alpha, VEGF, ID1, ID2, HIF1alpha, E-cadherin, catenin, EphB2, fibronectin-1, HTATIP2, tissue inhibitor of metalloprotease-4, integrin a7b1, HGFRh, TGF-beta1, VEGF, kisspeptin, interleukin-1beta
Expression of Snail is associated with myofibroblast phenotype development in oral squamous cell carcinoma.	/pubmed/19198871	Franz M, Spiegel K, Umbreit C, Richter P, Codina-Canet C, Berndt A, Altendorf-Hofmann A, Koscielny S, Hyckel P, Kosmehl H, Virtanen I, Berndt A.	E-cadherin, alpha SMA, TGF beta 1, EGF, Snail, vimentin,
ILEI requires oncogenic Ras for the epithelial to mesenchymal transition of hepatocytes and liver carcinoma progression.	/pubmed/19015638	Lahsnig C, Mikula M, Petz M, Zulehner G, Schneller D, van Zijl F, Huber H, Csiszar A, Beug H, Mikulits W.	TGF-beta, ILEI, Ras, E-cadherin, ZO-1, alpha-SMA, PDGF, PDGF-R, beta-catenin, pY-Stat3, PI3K
Rb depletion results in deregulation of E-cadherin and induction of cellular phenotypic changes that are characteristic of the epithelial-to-mesenchymal transition.	/pubmed/18593909	Arima Y, Inoue Y, Shibata T, Hayashi H, Nagano O, Saya H, Taya Y.	Rb, E-cadherin, Slug, Zeb-1, transcription factor activator protein-2alpha.
The transcription factor snail mediates epithelial to mesenchymal transitions by repression of estrogen receptor-alpha.	/pubmed/17761946	Dhasarathy A, Kajita M, Wade PA.	Snail, ER-alpha, TGF-beta
Src phosphorylates Tyr284 in TGF-beta type II receptor and regulates TGF-beta stimulation of p38 MAPK during breast cancer cell proliferation and invasion.	/pubmed/17440088	Galliher AJ, Schiemann WP.	Src, TbetaR-II, TGF-beta, Smad2/3, p38 MAPK, Grb2, Shc, alpha(v)beta(3) integrin
Snail is required for transforming growth factor-beta-induced epithelial-mesenchymal transition by activating PI3 kinase/Akt signal pathway.	/pubmed/17187756	Cho HJ, Baek KE, Saika S, Jeong MJ, Yoo J.	TGF-beta, Smad3, PI3K, Akt, alpha-SMA, Snai
In vivo and in vitro evidence for transforming growth factor-beta1-mediated epithelial to mesenchymal transition in esophageal adenocarcinoma.	/pubmed/17018615	Rees JR, Onwuegbusi BA, Save VE, Alderson D, Fitzgerald RC.	E-cadherin, cytokeratin 18, vimentin, alpha-SMA, TGF-beta1, BMP7, SMAD4
Autocrine PDGFR signaling promotes mammary cancer metastasis.	/pubmed/16741576	Jechlinger M, Sommer A, Moriggl R, Seither P, Kraut N, Capodiecci P, Donovan M, Cordon-Cardo C, Beug H, Gr’_nert S.	TGF-beta, PDGFR, Ras, PI3K, STAT1
A crucial function of PDGF in TGF-beta-mediated cancer progression of hepatocytes.	/pubmed/16607286	Gotzmann J, Fischer AN, Zojer M, Mikula M, Proell V, Huber H, Jechlinger M, Waerner T, Weith A, Beug H, Mikulits W.	TGF-beta, Smads, E-cadherin, Snail, PDGF-A, PDGFR
Altered localization of p120 catenin during epithelial to mesenchymal transition of colon carcinoma is prognostic for aggressive disease.	/pubmed/16322241	Bellovin DI, Bates RC, Muzikansky A, Rimm DL, Mercurio AM.	RhoA, E-cadherin, p120ctn, RhoA
Regulation of cytokine receptors by Golgi N-glycan processing and endocytosis.	/pubmed/15459394	Partridge EA, Le Roy C, Di Guglielmo GM, Pawling J, Cheung P, Granovsky M, Nabi IR, Wrana JL, Dennis JW.	Mgat5, N-glycan, Gal-3, EGFR, TGFR,
Collaborative activities of macrophage-stimulating protein and transforming growth factor-beta1 in induction of epithelial to mesenchymal transition: roles of the RON receptor tyrosine kinase.	/pubmed/15001985	Wang D, Shen Q, Chen YQ, Wang MH.	TGF-beta1, Ras, Raf, RON, E-cadherin, beta-catenin, vimentin, alpha-SMA, Smad2

## Sheet: PDGF.MC
PDGF (56)
Title	URL	Description	Gene(s)
Mechanism for oral tumor cell lysyl oxidase like-2 in cancer development: synergy with PDGF-AB.	/pubmed/31086173+BX5:BX63	Mahjour F, Dambal V, Shrestha N, Singh V, Noonan V, Kantarci A, Trackman PC.	PDGFRβ, LOXL2, PDGF-AB, ERK
Effects of multi and selective targeted tyrosine kinase inhibitors on function and signaling of different bladder cancer cells.	/pubmed/29966976	H’_nze J, Kessel F, Di Fazio P, Hofmann R, Hegele A.	FGFR, CDKN1A (p21, MAPK
Protein expression patterns in cancer-associated fibroblasts and cells undergoing the epithelial-mesenchymal transition in ovarian cancers.	/pubmed/29938002	Fukagawa D, Sugai T, Osakabe M, Suga Y, Nagasawa T, Itamochi H, Sugiyama T.	CD10, α-SMA, Slug and ZEB1, podoplanin, PDGFRα, PDGFRβ
Platelet-derived growth factor receptor-Ô± and -Ô_ promote cancer stem cell phenotypes in sarcomas.	/pubmed/29915281	Chang KK, Yoon C, Yi BC, Tap WD, Simon MC, Yoon SS.	PDGFR-α/β, CD133, Nanog, Oct4, and Slug, Snail, Zeb1
The histone deacetylases HDAC1 and HDAC2 are required for the growth and survival of renal carcinoma cells.	/pubmed/29845424	Kiweler N, Brill B, Wirth M, Breuksch I, Laguna T, Dietrich C, Strand S, Schneider G, Groner B, Butter F, Heinzel T, Brenner W, Kr’_mer OH.	HDAC, E-cadherin, PDGFRβ
Analysis of cancer-associated fibroblasts and the epithelial-mesenchymal transition in cutaneous basal cell carcinoma, squamous cell carcinoma, and malignant melanoma.	/pubmed/29555579	Sasaki K, Sugai T, Ishida K, Osakabe M, Amano H, Kimura H, Sakuraba M, Kashiwa K, Kobayashi S.	AEBP1, PDGFRα, PDGFRβ, FAP, Slug, PDGFRβ, S100A4, Twist, podoplanin, CD10, α-SMA, Zeb1,
Dihydroartemisinin selectively inhibits PDGFRÔ±-positive ovarian cancer growth and metastasis through inducing degradation of PDGFRÔ± protein.	/pubmed/29387451	Li X, Ba Q, Liu Y, Yue Q, Chen P, Li J, Zhang H, Ying H, Ding Q, Song H, Liu H, Zhang R, Wang H.	PDGFRα, PI3K, MAPK
Molecular and functional analysis of anchorage independent, treatment-evasive neuroblastoma tumorspheres with enhanced malignant properties: A possible explanation for radio-therapy resistance.	/pubmed/29298329	Abou-Antoun TJ, Nazarian J, Ghanem A, Vukmanovic S, Sandler AD.	survivin, CDC2, Poly [ADP-ribose] polymerase 1, PDGFRβ, EGFR, VEGFR, MYCN, SOX2,
Agrin para-secreted by PDGF-activated human hepatic stellate cells promotes hepatocarcinogenesis in vitro and in vivo.	/pubmed/29285255	Lv X, Fang C, Yin R, Qiao B, Shang R, Wang J, Song W, He Y, Chen Y.	PDGF, LX-2, MET.
Involvement of PI3K/Akt pathway in the inhibition of hepatocarcinoma cell invasion and metastasis induced by SASH1 through downregulating Shh-Gli1 signaling.	/pubmed/28600143	Sun C, Zhang Z, He P, Zhou Y, Xie X.	Shh, Gli1, SASH1, PI3K, pAkt, PDGF
SU6668 modulates prostate cancer progression by downregulating MTDH/AKT signaling pathway.	/pubmed/28339027	Qian B, Yao Y, Liu C, Zhang J, Chen H, Li H.	MTDH, AKT, PI3K
The tyrosine kinase inhibitors effects on metastatic tumor graft in the chick chorioallantoic membrane assay.	/pubmed/29556614	Ciolofan A, Cre£u OM, MogoantóÛ S_, CiucóÛ EM.	CD34, podoplanin, PDGFA, EGFR, VEGFA, podoplanin and EGFR, mTOR, PTEN
Platelet derived growth factor receptor alpha mediates nodal metastases in papillary thyroid cancer by driving the epithelial-mesenchymal transition.	/pubmed/27845909	Ekpe-Adewuyi E, Lopez-Campistrous A, Tang X, Brindley DN, McMullen TP.	MAPK, PDGFRα, MAPK/Erk, PI3K/Akt, STAT3, Snail, Slug
Epithelial-to-mesenchymal transition confers pericyte properties on cancer cells.	/pubmed/27721239	Shenoy AK, Jin Y, Luo H, Tang M, Pampo C, Shao R, Siemann DW, Wu L, Heldermon CD, Law BK, Chang LJ, Lu J.	PDGFR-β, N-cadherin
PDGF-D/PDGFRÔ_ promotes tongue squamous carcinoma cell (TSCC) progression via activating p38/AKT/ERK/EMT signal pathway.	/pubmed/27507215	Zhang H, Sun JD, Yan LJ, Zhao XP.	PDGF-D, PDGFRβ, p38, AKT, ERK, E-cadherin, N-cadherin, Vimentin, snail
Elevated sL1-CAM levels in BALF and serum of IPF patients.	/pubmed/26610737	Zhang Y, Bi L, Qiu Y, Wang Y, Ding J, Zhuang Y, Tian Y, Cai H.	L1-CAM
Reversing cancer stemness.	/pubmed/26583906	Block J, Meng F, Wu G.	none
MiR-34a inhibits colon cancer proliferation and metastasis by inhibiting platelet-derived growth factor receptor Ô±.	/pubmed/26324236	Li C, Wang Y, Lu S, Zhang Z, Meng H, Liang L, Zhang Y, Song B.	miR‑34a, PDGFRA
Nef-M1, a peptide antagonist of CXCR4, inhibits tumor angiogenesis and epithelialŠ—•toŠ—•mesenchymal transition in colon and breast cancers.	/pubmed/26318034	Katkoori VR, Basson MD, Bond VC, Manne U, Bumpers HL.	CXCR4, VEGF-A, E-cadherin
Identification of Novel Biomarkers for Metastatic Colorectal Cancer Using Angiogenesis-Antibody Array and Intracellular Signaling Array.	/pubmed/26258407	Chung S, Dwabe S, Elshimali Y, Sukhija H, Aroh C, Vadgama JV.	Akt, STAT3, AMPKα, Bad, IL-6, EGFR, HER2 receptor, Insulin R, IGF-1R
Specific chemotherapeutic agents induce metastatic behaviour through stromal- and tumour-derived cytokine and angiogenic factor signalling.	/pubmed/25988668	Liu G, Chen Y, Qi F, Jia L, Lu XA, He T, Fu Y, Li L, Luo Y.	CXCR2, CXCR4, S1P/S1PR1, PlGF, PDGF-BB, CXCL1, SDF-1α
Laparoscopic surgery for colorectal cancer is not associated with an increase in the circulating levels of several inflammation-related factors.	/pubmed/25875151	Crucitti A, Corbi M, Tomaiuolo PM, Fanali C, Mazzari A, Lucchetti D, Migaldi M, Sgambato A.	IL-1β, IL-7, IL-8, G-CSF, IFN-γ, TNF-α
Targeting vascular pericytes in hypoxic tumors increases lung metastasis via angiopoietin-2.	/pubmed/25704811	Keskin D, Kim J, Cooke VG, Wu CC, Sugimoto H, Gu C, De Palma M, Kalluri R, LeBleu VS.	ANG2, Angpt2
PDGFRÔ± and Ô_ play critical roles in mediating Foxq1-driven breast cancer stemness and chemoresistance.	/pubmed/25502837	Meng F, Speyer CL, Zhang B, Zhao Y, Chen W, Gorski DH, Miller FR, Wu G.	Twist1, Zeb2, PDGFRα and β, Foxq1
PDGF receptor-Ô± promotes TGF-Ô_ signaling in hepatic stellate cells via transcriptional and posttranscriptional regulation of TGF-Ô_ receptors.	/pubmed/25169976	Liu C, Li J, Xiang X, Guo L, Tu K, Liu Q, Shah VH, Kang N.	PDGFR-α, TGF-β, PDGF-α and -β receptors, SMAD2, TβRI/TβRII
LIM-homeobox gene 2 promotes tumor growth and metastasis by inducing autocrine and paracrine PDGF-B signaling.	/pubmed/24423492	Kuzmanov A, Hopfer U, Marti P, Meyer-Schaller N, Yilmaz M, Christofori G.	Lhx2, PDGF-B, PDGFRβ
Platelet P2Y12 is involved in murine pulmonary metastasis.	/pubmed/24236201	Wang Y, Sun Y, Li D, Zhang L, Wang K, Zuo Y, Gartner TK, Liu J.	platelet ADP receptor P2Y12, TGFβ1
Changes in the peripheral blood and bone marrow from untreated advanced breast cancer patients that are associated with the establishment of bone metastases.	/pubmed/24173696	Martinez LM, Vallone VB, Labovsky V, Choi H, Hofer EL, Feldman L, Bordenave RH, Batagelj E, Dimase F, Villafa’±e AR, Chasseing NA.	PDGF-AB, ICAM-1, VCAM-1
Phosphatase of regenerating liver 3 (PRL3) provokes a tyrosine phosphoproteome to drive prometastatic signal transduction.	/pubmed/24030100	Walls CD, Iliuk A, Bai Y, Wang M, Tao WA, Zhang ZY.	PRL3, GTPase, PI3K-Akt, STAT, ERK, Src
MicroRNA-221 mediates the effects of PDGF-BB on migration, proliferation, and the epithelial-mesenchymal transition in pancreatic cancer cells.	/pubmed/23967190	Su A, He S, Tian B, Hu W, Zhang Z.	miR-221, PDGF, p27Kip1.
Origin and function of myofibroblasts in kidney fibrosis.	/pubmed/23817022	LeBleu VS, Taduri G, O'Connell J, Teng Y, Cooke VG, Woda C, Sugimoto H, Kalluri R.	Tgfbr2, αSMA
Knockdown of N-acetylglucosaminyl transferase V ameliorates hepatotoxin-induced liver fibrosis in mice.	/pubmed/23798564	Liu J, Zhang Z, Tu X, Liu J, Zhang H, Zhang J, Zang Y, Zhu J, Chen J, Dong L, Zhang J.	GnT-V, TGF-β1, Smad, PDGF, Erk
HRG regulates tumor progression, epithelial to mesenchymal transition and metastasis via platelet-induced signaling in the pre-tumorigenic microenvironment.	/pubmed/23793459	Cedervall J, Zhang Y, Ringvall M, Thulin A, Moustakas A, Jahnen-Dechent W, Siegbahn A, Olsson AK.	histidine-rich glycoprotein (HRG), TBK1, Akt2, PDGFRβ
Clinicopathological significance of platelet-derived growth factor B, platelet-derived growth factor receptor-Ô_, and E-cadherin expression in gastric carcinoma.	/pubmed/23788982	Guo Y, Yin J, Zha L, Wang Z.	PDGF-B, PDGFR-β, E-cadherin
Enrichment map profiling of the cancer invasion front suggests regulation of colorectal cancer progression by the bone morphogenetic protein antagonist, gremlin-1.	/pubmed/23659962	Karagiannis GS, Berk A, Dimitromanolakis A, Diamandis EP.	BMP
Pharmacological inhibition of platelet-tumor cell cross-talk prevents platelet-induced overexpression of cyclooxygenase-2 in HT29 human colon carcinoma cells.	/pubmed/23580446	Dovizio M, Maier TJ, Alberti S, Di Francesco L, Marcantoni E, M’_nch G, John CM, Suess B, Sgambato A, Steinhilber D, Patrignani P.	galectin-3, COX-2
NPV-LDE-225 (Erismodegib) inhibits epithelial mesenchymal transition and self-renewal of glioblastoma initiating cells by regulating miR-21, miR-128, and miR-200.	/pubmed/23482671	Fu J, Rodova M, Nanta R, Meeker D, Van Veldhuizen PJ, Srivastava RK, Shankar S.	Gli1, caspase-3, poly(ADP-ribose) polymerase, TRAIL-R1/DR4, TRAIL-R2, Fas, PDGF-α, Bcl2, DR4/5, programmed cell death 4, miR-21, Nanog, Oct4, Sox2, cMyc, Bmi1, miR-128. E-cadherin, N-cadherin, Snail, Slug, Zeb1, SHH
PDGFRB promotes liver metastasis formation of mesenchymal-like colorectal tumor cells.	/pubmed/23441134	Steller EJ, Raats DA, Koster J, Rutten B, Govaert KM, Emmink BL, Snoeren N, van Hooff SR, Holstege FC, Maas C, Borel Rinkes IH, Kranenburg O.	PDGFRB, TGFB, PDGF
Tanshinone IIA inhibits metastasis after palliative resection of hepatocellular carcinoma and prolongs survival in part via vascular normalization.	/pubmed/23137165	Wang WQ, Liu L, Sun HC, Fu YL, Xu HX, Chai ZT, Zhang QB, Kong LQ, Zhu XD, Lu L, Ren ZG, Tang ZY.	VEGFR1, PDGFR
Sulforaphane regulates self-renewal of pancreatic cancer stem cells through the modulation of Sonic hedgehog-GLI pathway.	/pubmed/23129257	Li SH, Fu J, Watkins DN, Srivastava RK, Shankar S.	Sonic hedgehog, Smo, Gli 1, Gli 2, Nanog, Oct-4, VEGF, PDGFRα, Zeb-1, E-Cadherin, Bcl-2, XIAP
An in vivo model of epithelial to mesenchymal transition reveals a mitogenic switch.	/pubmed/22906417	Jahn SC, Law ME, Corsino PE, Parker NN, Pham K, Davis BJ, Lu J, Law BK.	HGF, PDGF, LPA receptor, Raf, Erk
PDGF enhances IRES-mediated translation of Laminin B1 by cytoplasmic accumulation of La during epithelial to mesenchymal transition.	/pubmed/22904067	Petz M, Them NC, Huber H, Mikulits W.	PDGF, IRES, LamB1
Direct signaling between platelets and cancer cells induces an epithelial-mesenchymal-like transition and promotes metastasis.	/pubmed/22094253	Labelle M, Begum S, Hynes RO.	TGFβ1, Smad, NF-κB
Molecular markers of epithelial-to-mesenchymal transition are associated with tumor aggressiveness in breast carcinoma.	/pubmed/21804917	Sethi S, Sarkar FH, Ahmed Q, Bandyopadhyay S, Nahleh ZA, Semaan A, Sakr W, Munkarah A, Ali-Fehmi R.	Vimentin, EGFR, NF-κ B
Targeting invadopodia to block breast cancer metastasis.	/pubmed/21725138	Eckert MA, Yang J.	Twist1, PDGFR, Src
Twist1-induced invadopodia formation promotes tumor metastasis.	/pubmed/21397860	Eckert MA, Lwin TM, Chang AT, Kim J, Danis E, Ohno-Machado L, Yang J.	Twist1, PDGFRα, Src
Molecular signature of epithelial-mesenchymal transition (EMT) in human prostate cancer bone metastasis.	/pubmed/21139809	Sethi S, Macoska J, Chen W, Sarkar FH.	E-cadherin, Vimentin, PDGF-D, NF-κB, Notch-1 and ZEB1
Epithelial to mesenchymal transition is mechanistically linked with stem cell signatures in prostate cancer cells.	/pubmed/20805998	Kong D, Banerjee S, Ahmad A, Li Y, Wang Z, Sethi S, Sarkar FH.	Sox2, Nanog, Oct4, Lin28B, Notch1, miR-200, let-7
Modulation of markers associated with aggressive phenotype in MDA-MB-231 breast carcinoma cells by sulforaphane.	/pubmed/19728765	Hunakova L, Sedlakova O, Cholujova D, Gronesova P, Duraj J, Sedlak J.	PBR, vimentin MMP7, MMP14, Twist1, POU5F1, IL-1beta, IL-6, TNF-alpha, IFN-gamma, IL-4 , PDGF, VEGF
ILEI requires oncogenic Ras for the epithelial to mesenchymal transition of hepatocytes and liver carcinoma progression.	/pubmed/19015638	Lahsnig C, Mikula M, Petz M, Zulehner G, Schneller D, van Zijl F, Huber H, Csiszar A, Beug H, Mikulits W.	ILEI, Ras, E-cadherin, ZO-1, alpha-smooth muscle actin, PDGF, PDGF-R, beta-catenin, nuclear pY-Stat3
Kinase switching in mesenchymal-like non-small cell lung cancer lines contributes to EGFR inhibitor resistance through pathway redundancy.		Thomson S, Petti F, Sujka-Kwok I, Epstein D, Haley JD.	EGFR, ErbB2, and ErbB3, PDGFR, FGFR, MEK, ERK, PI3K, TGFbeta,
Platelet-derived growth factor-D overexpression contributes to epithelial-mesenchymal transition of PC3 prostate cancer cells.	/pubmed/18403754	Kong D, Wang Z, Sarkar SH, Li Y, Banerjee S, Saliganan A, Kim HR, Cher ML, Sarkar FH.	PDGF, PDGF-D
Awd, the homolog of metastasis suppressor gene Nm23, regulates Drosophila epithelial cell invasion.	/pubmed/18212059	Nallamothu G, Woolworth JA, Dammai V, Hsu T.	Nm23/awd, Pvr, JAK, STAT, dynamin.
PDGF essentially links TGF-beta signaling to nuclear beta-catenin accumulation in hepatocellular carcinoma progression.	/pubmed/17130832	Fischer AN, Fuchs E, Mikula M, Huber H, Beug H, Mikulits W.	PDGF-A, PDGF receptors, PI3K, beta-catenin, p16(INK4A), cyclin D1, c-myc, TGF-beta
Autocrine PDGFR signaling promotes mammary cancer metastasis.	/pubmed/16741576	Jechlinger M, Sommer A, Moriggl R, Seither P, Kraut N, Capodiecci P, Donovan M, Cordon-Cardo C, Beug H, Gr’_nert S.	PDGF, PDGFR, TGF-beta, Ras, PI3K, STAT1
A crucial function of PDGF in TGF-beta-mediated cancer progression of hepatocytes.	/pubmed/16607286	Gotzmann J, Fischer AN, Zojer M, Mikula M, Proell V, Huber H, Jechlinger M, Waerner T, Weith A, Beug H, Mikulits W.	TGF-beta, E-cadherin, Snail, PDGF-A ligand, PDGF receptors

## Sheet: FGF.MC
FGF (115)
Title	URL	Description	Gene(s)
The Inhibitory Effect of Propylene Glycol Alginate Sodium Sulfate on Fibroblast Growth Factor 2-Mediated Angiogenesis and Invasion in Murine Melanoma B16-F10 Cells In Vitro.	/pubmed/31035725	Ma H, Qiu P, Xu H, Xu X, Xin M, Chu Y, Guan H, Li C, Yang J.	FGF2, MMP-2, MMP-9, Vimentin
Bone vascular niche E-selectin induces mesenchymal-epithelial transition and Wnt activation in cancer cells to promote bone metastasis.	/pubmed/30988423	Esposito M, Mondal N, Greco TM, Wei Y, Spadazzi C, Lin SC, Zheng H, Cheung C, Magnani JL, Lin SH, Cristea IM, Sackstein R, Kang Y.	E-selectin, Wnt, Fut3, Fut6, Glg1
Novel role of Snail 1 in promoting tumor neoangiogenesis.	/pubmed/30975732	Zhang YK, Wang H, Guo YW, Yue Y.	Snai1, FGF1, VEGF, CD31, CD34, VWF, TIMP2, ENG, HIF1A, ID1, VEGFA, PLG, LECT1, HPSE
Downregulation of miRNA-214 in cancer-associated fibroblasts contributes to migration and invasion of gastric cancer cells through targeting FGF9 and inducing EMT.	/pubmed/30646925	Wang R, Sun Y, Yu W, Yan Y, Qiao M, Jiang R, Guan W, Wang L.	MiRNA-214, E-cadherin, Vimentin, N-cadherin, Snail, FGF9
miRNA-133b targets FGFR1 and presents multiple tumor suppressor activities in osteosarcoma.	/pubmed/30574019	Gao G, Tian Z, Zhu HY, Ouyang XY.	miR-133b, FGFR1, Ras, MAPK, PI3K, Akt
The close relationship between heparanase and epithelial mesenchymal transition in gastric signet-ring cell adenocarcinoma.	/pubmed/30333909	Shah S, Fourgeaud C, Derieux S, Mirshahi S, Contant G, Pimpie C, Lo Dico R, Soria J, Pocard M, Mirshahi M.	HPSE, collagen-I, TGF-β1, VEGF-A, Snail, Slug, Vimentin, α-SMA, Fibronectin, MDR-1, LRP
FGF18 Enhances Migration and the Epithelial-Mesenchymal Transition in Breast Cancer by Regulating Akt/GSK3Ô_/Ôê-Catenin Signaling.	/pubmed/30196303	Song N, Zhong J, Hu Q, Gu T, Yang B, Zhang J, Yu J, Ma X, Chen Q, Qi J, Liu Y, Su W, Feng Z, Wang X, Wang H.	FGF18, Akt, GSK3β, β-catenin, CDK2, CCND2, Ki67, TGF-β, MMP-2, MMP-9, Snail-1, Snail-2, N-cadherin, vimentin, TIMP1
TGF-Ô_ induced epithelial-mesenchymal transition in an advanced cervical tumor model by 3D printing.	/pubmed/30129928	Pang Y, Mao SS, Yao R, He JY, Zhou ZZ, Feng L, Zhang KT, Cheng SJ, Sun W.	TGF-β, E-cadherin, snail, vimentin, N-cadherin
Effects of multi and selective targeted tyrosine kinase inhibitors on function and signaling of different bladder cancer cells.	/pubmed/29966976	H’_nze J, Kessel F, Di Fazio P, Hofmann R, Hegele A.	FGFR, CDKN1A, p21, MAPK
Protein expression patterns in cancer-associated fibroblasts and cells undergoing the epithelial-mesenchymal transition in ovarian cancers.	/pubmed/29938002	Fukagawa D, Sugai T, Osakabe M, Suga Y, Nagasawa T, Itamochi H, Sugiyama T.	CD10, podoplanin, FAP, PDGFRα, PDGFRβ, S100A4, α-SMA, CD10, podoplanin, α-SMA, Slug, ZEB1,
Fibroblast growth factorÎ¾18 promotes the growth, migration and invasion of MDAŠ—•MBŠ—•231 cells.	/pubmed/29901199	Yu Z, Lou L, Zhao Y.	FGF18, p‑ERK, c‑Myc, N‑cadherin, vimentin, Snail 1
FGFR1-ERK1/2-SOX2 axis promotes cell proliferation, epithelial-mesenchymal transition, and metastasis in FGFR1-amplified lung cancer.	/pubmed/29858603	Wang K, Ji W, Yu Y, Li Z, Niu X, Xia W, Lu S.	FGFR1, FGF2, SOX2, ERK1/2, MEK, ERK
miR-24-3p/FGFR3 Signaling as a Novel Axis Is Involved in Epithelial-Mesenchymal Transition and Regulates Lung Adenocarcinoma Progression.	/pubmed/29850625	Jing P, Zhao N, Xie N, Ye M, Zhang Y, Zhang Z, Li M, Lai X, Zhang J, Gu Z.	FGFR1, FGF2, SOX2, ERK1/2, MEK
Epithelial Splicing Regulatory Protein 1 Inhibits the Invasion and Metastasis of Lung Adenocarcinoma.	/pubmed/29803834	Li L, Qi L, Qu T, Liu C, Cao L, Huang Q, Song W, Yang L, Qi H, Wang Y, Gao B, Guo Y, Sun B, Meng B, Zhang B, Cao W.	ZEB1, ESRP1, CD44, FGFR, MMP2
The IGF2/IR/IGF1R Pathway in Tumor Cells and Myofibroblasts Mediates Resistance to EGFR Inhibition in Cholangiocarcinoma.	/pubmed/29716918	Vaquero J, Lobe C, Tahraoui S, Clap’©ron A, Mergey M, Merabtene F, Wendum D, Coulouarn C, Housset C, Desbois-Mouthon C, Praz F, Fouassier L.	IR, IGF1R, IGF2, EGFR
Downregulation of miR-491-5p promotes gastric cancer metastasis by regulating SNAIL and FGFR4.	/pubmed/29569792	Yu T, Wang LN, Li W, Zuo QF, Li MM, Zou QM, Xiao B.	miR-491-5p, SNAIL, FGFR4
Cancer-associated fibroblasts induce epithelial-mesenchymal transition through secreted cytokines in endometrial cancer cells.	/pubmed/29563996	Wang X, Zhang W, Sun X, Lin Y, Chen W.	E-cadherin, N-cadherin, vimentin, EGFR, TGFR-β, HGF, FGFR
Analysis of cancer-associated fibroblasts and the epithelial-mesenchymal transition in cutaneous basal cell carcinoma, squamous cell carcinoma, and malignant melanoma.	/pubmed/29555579	Sasaki K, Sugai T, Ishida K, Osakabe M, Amano H, Kimura H, Sakuraba M, Kashiwa K, Kobayashi S.	AEBP1, podoplanin, PDGFRα, PDGFRβ, FAP, CD10, S100A4, α-SMA, Zeb1, Slug,Twist
Nicotine upregulates FGFR3 and RB1 expression and promotes non-small cell lung cancer cell proliferation and epithelial-to-mesenchymal transition via downregulation of miR-99b and miR-192.	/pubmed/29518612	Du X, Qi F, Lu S, Li Y, Han W.	miR-99b, miR-192, FGFR3, RB1,
Separation of cell survival, growth, migration, and mesenchymal transdifferentiation effects of fibroblast secretome on tumor cells of head and neck squamous cell carcinoma.	/pubmed/29157176	Metzler VM, Pritz C, Riml A, Romani A, Tuertscher R, Steinbichler T, Dejaco D, Riechelmann H, Dud’s J.	TGF beta-1, TGF beta-1, E-cadherin
CXCR4/CXCR7/CXCL12 axis promotes an invasive phenotype in medullary thyroid carcinoma.	/pubmed/29112684	Werner TA, Forster CM, Dizdar L, Verde PE, Raba K, Schott M, Knoefel WT, Krieg A.	CXCR4
Fibroblast-specific inhibition of TGF-Ô_1 signaling attenuates lung and tumor fibrosis.	/pubmed/28872461	Wei Y, Kim TJ, Peng DH, Duan D, Gibbons DL, Yamauchi M, Jackson JR, Le Saux CJ, Calhoun C, Peters J, Derynck R, Backes BJ, Chapman HA.	TGF-β1, LOXL2, K731
Cancer-associated fibroblasts secrete FGF-1 to promote ovarian proliferation, migration, and invasion through the activation of FGF-1/FGFR4 signaling.	/pubmed/28718374	Sun Y, Fan X, Zhang Q, Shi X, Xu G, Zou C.	FGF-1, 4, MAPK, extracellular signal-regulated protein kinase, Snail1, MMP3, E-cadherin,
Pirfenidone may revert the epithelial-to-mesenchymal transition in human lung adenocarcinoma.	/pubmed/28693256	Kurimoto R, Ebata T, Iwasawa S, Ishiwata T, Tada Y, Tatsumi K, Takiguchi Y.	PD-L1, TGF-β, FGF-2, E-cadherin, vimentin, fibronectin, slug,
FOXC1 Regulates FGFR1 Isoform Switching to Promote Invasion Following TGFÔ_-Induced EMT.	/pubmed/28684636	Hopkins A, Coatham ML, Berry FB.	FOXC1, FGFR1, TGFβ1
HGF induces EMT in non-small-cell lung cancer through the hBVR pathway.	/pubmed/28554854	Liu F, Song S, Yi Z, Zhang M, Li J, Yang F, Yin H, Yu X, Guan C, Liu Y, Liu Z, Wang J, Zhu D.	HGF, hBVR, TGF-β, FGF, EGF, Met
A Versatile Tumor Gene Deletion System Reveals a Crucial Role for FGFR1 in Breast Cancer Metastasis.	/pubmed/28433771	Wang W, Meng Y, Dong B, Dong J, Ittmann MM, Creighton CJ, Lu Y, Zhang H, Shen T, Wang J, Rowley DR, Li Y, Chen F, Moore DD, Yang F.	FGFR1
SU6668 modulates prostate cancer progression by downregulating MTDH/AKT signaling pathway.	/pubmed/28339027	Qian B, Yao Y, Liu C, Zhang J, Chen H, Li H.	VEGFR2, PDGFRβ, FGFR1, MTDH, AKT, PI3K
Loss of hSef promotes metastasis through upregulation of EMT in prostate cancer.	/pubmed/28073170	Hori S, Wadhwa K, Pisupati V, Zecchini V, Ramos-Montoya A, Warren AY, Neal DE, Gnanapragasam VJ.	FGF, hSef, E-Cadherin, ERK, MAPK, JNK, p38
Keratin 19 as a key molecule in progression of human hepatocellular carcinomas through invasion and angiogenesis.	/pubmed/27863477	Takano M, Shimada K, Fujii T, Morita K, Takeda M, Nakajima Y, Nonomura A, Konishi N, Obayashi C.	p16, p27, E-cadherin, VASH1, FGFR1, VASH2
FGFR4 Arg388 Is Correlated with Poor Survival in Resected Colon Cancer Promoting Epithelial to Mesenchymal Transition.	/pubmed/27857023	Cho SH, Hong CS, Kim HN, Shin MH, Kim KR, Shim HJ, Hwang JE, Bae WK, Chung IJ.	FGFR4
Snail1-Dependent Activation of Cancer-Associated Fibroblast Controls Epithelial Tumor Cell Invasion and Metastasis.	/pubmed/27503928	Alba-Castell’_n L, Olivera-Salguero R, Mestre-Farrera A, Pe’±a R, Herrera M, Bonilla F, Casal JI, Baulida J, Pe’±a C, Garc’_a de Herreros A.	Snail1, TGFβ
FGF4 induces epithelial-mesenchymal transition by inducing store-operated calcium entry in lung adenocarcinoma.	/pubmed/27677589	Qi L, Song W, Li L, Cao L, Yu Y, Song C, Wang Y, Zhang F, Li Y, Zhang B, Cao W.	FGF4
An Enzyme- and Serum-free Neural Stem Cell Culture Model for EMT Investigation Suited for Drug Discovery.	/pubmed/27583933	Sailer MH, Sarvepalli D, Br’©g’åre C, Fisch U, Guentchev M, Weller M, Guzman R, Bettler B, Ghosh A, Hutter G.	TGFβ, BMP, FGF
Covalent Targeting of Fibroblast Growth Factor Receptor Inhibits Metastatic Breast Cancer.	/pubmed/27371729	Brown WS, Tan L, Smith A, Gray NS, Wendt MK.	β3 integrin, FGFR1, FGF2, E-cadherin, FAK
Notch4+ cancer stem-like cells promote the metastatic and invasive ability of melanoma.	/pubmed/27234159	Lin X, Sun B, Zhu D, Zhao X, Sun R, Zhang Y, Zhang D, Dong X, Gu Q, Li Y, Liu F.	Notch4, JAG2, Twist1, vimentin, VE-cadherin, E-cadherin, γ-secretase
GM-CSF Mediates Mesenchymal-Epithelial Cross-talk in Pancreatic Cancer.	/pubmed/27184426	Waghray M, Yalamanchili M, Dziubinski M, Zeinali M, Erkkinen M, Yang H, Schradle KA, Urs S, Pasca Di Magliano M, Welling TH, Palmbos PL, Abel EV, Sahai V, Nagrath S, Wang L, Simeone DM.	none
Inhibition of pro-HGF activation by SRI31215, a novel approach to block oncogenic HGF/MET signaling.	/pubmed/27121052	Owusu BY, Bansal N, Venukadasula PK, Ross LJ, Messick TE, Goel S, Galemmo RA, Klampfer L.	HGF, MET, EGFR
A supercritical-CO2 extract of Ganoderma lucidum spores inhibits cholangiocarcinoma cell migration by reversing the epithelial-mesenchymal transition.	/pubmed/27064008	Li L, Guo HJ, Zhu LY, Zheng L, Liu X.	TGF-β1, E-cadherin, N-cadherin, Fibronectin
Potential Co-Relation Between Chronic Periodontitis And Cancer - An Emerging Concept.	/pubmed/27050175	Shrihari TG, Vasudevan V, Manjunath V, Devaraju D.	FGF, EGF, TGF-Beta, ROS, NOS, TNFAlfa, IL-1 Beta, IL-6, MMP-9, Arginase1, NF-KB, STAT3
Drug resistance originating from a TGF-Ô_/FGF-2-driven epithelial-to-mesenchymal transition and its reversion in human lung adenocarcinoma cell lines harboring an EGFR mutation.	/pubmed/26984042	Kurimoto R, Iwasawa S, Ebata T, Ishiwata T, Sekine I, Tada Y, Tatsumi K, Koide S, Iwama A, Takiguchi Y.	EGFR, TGF-β, FGF-2, PD-L1, Smad3, MEK/Erk, mTOR
Sef Regulates Epithelial-Mesenchymal Transition in Breast Cancer Cells.	/pubmed/26950413	He Q, Gong Y, Gower L, Yang X, Friesel RE.	TGF-β, TNF-α, Sef, β-catenin.
Mesenchymal Cancer Cell-Stroma Crosstalk Promotes Niche Activation, Epithelial Reversion, and Metastatic Colonization.	/pubmed/26670048	Del Pozo Martin Y, Park D, Ramachandran A, Ombrato L, Calvo F, Chakravarty P, Spencer-Dene B, Derzsi S, Hill CS, Sahai E, Malanchi I.	THBS2, TGF-β, SMAD2-3, BMP, SMAD1-5
miR-195 Inhibits EMT by Targeting FGF2 in Prostate Cancer Cells.	/pubmed/26650737	Liu C, Guan H, Wang Y, Chen M, Xu B, Zhang L, Lu K, Tao T, Zhang X, Huang Y.	FGF2, miR-195
Isolation and Characterization of Circulating Tumor Cells in Squamous Cell Carcinoma of the Lung Using a Non-EpCAM-Based Capture Method.	/pubmed/26571236	Bozzetti C, Quaini F, Squadrilli A, Tiseo M, Frati C, Lagrasta C, Azzoni C, Bottarelli L, Galetti M, Alama A, Belletti S, Gatti R, Passaro A, Gradilone A, Cavazzoni A, Alfieri R, Petronini PG, Bonelli M, Falco A, Carubbi C, Pedrazzi G, Nizzoli R, et al.	FGFR1, EpCAM
High Expression of FGFR4 Enhances Tumor Growth and Metastasis in Nasopharyngeal Carcinoma.	/pubmed/26535066	Shi S, Li X, You B, Shan Y, Cao X, You Y.	FGFR4, Ki67
FGF19 promotes epithelial-mesenchymal transition in hepatocellular carcinoma cells by modulating the GSK3Ô_/Ô_- catenin signaling cascade via FGFR4 activation.	/pubmed/26498355	Zhao H, Lv F, Liang G, Huang X, Wu G, Zhang W, Yu L, Shi L, Teng Y.	E-cadherin, FGF19, GSK3β, FGFR4, β-catenin
Tumor-associated fibroblast-conditioned medium induces CDDP resistance in HNSCC cells.	/pubmed/26497215	Steinbichler TB, Metzler V, Pritz C, Riechelmann H, Dudas J.	TGF-β1
Identification of drugs as single agents or in combination to prevent carcinoma dissemination in a microfluidic 3D environment.	/pubmed/26474384	Bai J, Tu TY, Kim C, Thiery JP, Kamm RD.	Src, HGF, FGF-2,
MiR-573 inhibits prostate cancer metastasis by regulating epithelial-mesenchymal transition.	/pubmed/26451614	Wang L, Song G, Tan W, Qi M, Zhang L, Chan J, Yu J, Han J, Han B.	miR-573, TGF-β1, FGFR1, FGF2, GATA3
FGF1-FGFR1 axis promotes tongue squamous cell carcinoma (TSCC) metastasis through epithelial-mesenchymal transition (EMT).	/pubmed/26362179	Jiao J, Zhao X, Liang Y, Tang D, Pan C.	FGF1, FGFR1
Enhanced Expression of Integrin Ô±vÔ_3 Induced by TGF-Ô_ Is Required for the Enhancing Effect of Fibroblast Growth Factor 1 (FGF1) in TGF-Ô_-Induced Epithelial-Mesenchymal Transition (EMT) in Mammary Epithelial Cells.	/pubmed/26334633	Mori S, Kodaira M, Ito A, Okazaki M, Kawaguchi N, Hamada Y, Takada Y, Matsuura N.	integrin αvβ3, FGF1, TGF-β1, FGFR1
Asporin Is a Fibroblast-Derived TGF-Ô_1 Inhibitor and a Tumor Suppressor Associated with Good Prognosis in Breast Cancer.	/pubmed/26327350	Maris P, Blomme A, Palacios AP, Costanza B, Bellahc’åne A, Bianchi E, Gofflot S, Drion P, Trombino GE, Di Valentin E, Cusumano PG, Maweja S, Jerusalem G, Delvenne P, Lifrange E, Castronovo V, Turtoi A.	TGF-β1, SMAD2
TGFÔ_1 secreted by cancer-associated fibroblasts induces epithelial-mesenchymal transition of bladder cancer cells through lncRNA-ZEB2NAT.	/pubmed/26152796	Zhuang J, Lu Q, Shen B, Huang X, Shen L, Zheng X, Huang R, Yan J, Guo H.	TGFβ1, Smad2, ZEB2
A phenotype from tumor stroma based on the expression of metalloproteases and their inhibitors, associated with prognosis in breast cancer.	/pubmed/26140253	Eir’_ N, Fernandez-Garcia B, V’zquez J, Del Casar JM, Gonz’lez LO, Vizoso FJ.	MMP-11, TIMP-2
Co-culture of 3D tumor spheroids with fibroblasts as a model for epithelial-mesenchymal transition in vitro.	/pubmed/26022665	Kim SA, Lee EK, Kuh HJ.	fibronectin, laminin, type I collagen, TGFβ1, α-SMA, EGFR, CTGF; β-catenin and E-cadherin,
Tumor-Promoting Desmoplasia Is Disrupted by Depleting FAP-Expressing Stromal Cells.	/pubmed/25979873	Lo A, Wang LS, Scholler J, Monslow J, Avery D, Newick K, O'Brien S, Evans RA, Bajor DJ, Clendenin C, Durham AC, Buza EL, Vonderheide RH, June CH, Albelda SM, Pur’© E.	FAP
Laparoscopic surgery for colorectal cancer is not associated with an increase in the circulating levels of several inflammation-related factors.	/pubmed/25875151	Crucitti A, Corbi M, Tomaiuolo PM, Fanali C, Mazzari A, Lucchetti D, Migaldi M, Sgambato A.	IL-1β, IL-7, IL-8, G-CSF, IFN-γ and TNF-α
Quantitative changes in tumor-associated M2 macrophages characterize cholangiocarcinoma and their association with metastasis.	/pubmed/25854403	Thanee M, Loilome W, Techasen A, Namwat N, Boonmars T, Pairojkul C, Yongvanit P.	CD68, CD163, α-SMA, FSP-1, N-cadherin
Sox12, a direct target of FoxQ1, promotes hepatocellular carcinoma metastasis through up-regulating Twist1 and FGFBP1.	/pubmed/25704764	Huang W, Chen Z, Shang X, Tian D, Wang D, Wu K, Fan D, Xia L.	FGFBP1, Sox12, FoxQ1
[Role of transforming growth factor-Ô_1 in epithelial-mesenchymal transition of mesothelial cells and its effect on peritoneal metastasis of gastric cancer].	/pubmed/25656033	Lyu Z, Kong B, Liu X, Li F, Wang H, Xu H.	TGF-β1, α-SMA, vimentin, cytokeratin, E-cadherin, Smad2
FGF8 promotes colorectal cancer growth and metastasis by activating YAP1.	/pubmed/25473897	Liu R, Huang S, Lei Y, Zhang T, Wang K, Liu B, Nice EC, Xiang R, Xie K, Li J, Huang C.	YAP1, FGF8
Simultaneous expression of cancer stem cell-like properties and cancer-associated fibroblast-like properties in a primary culture of breast cancer cells.	/pubmed/25089665	Ishikawa M, Inoue T, Shirai T, Takamatsu K, Kunihiro S, Ishii H, Nishikata T.	HIF1A, NF-κB2, BNIP3, GAPDH, LDH, PGAM1, and PKM2
AKT/GSK-3Ô_ regulates stability and transcription of snail which is crucial for bFGF-induced epithelial-mesenchymal transition of prostate cancer cells.	/pubmed/25088797	Liu ZC, Wang HS, Zhang G, Liu H, Chen XH, Zhang F, Chen DY, Cai SH, Du J.	bFGF, Snail, GSK-3β, PI3K, AKT
FGF10: Type III Epithelial Mesenchymal Transition and Invasion in Breast Cancer Cell Lines.	/pubmed/25057305	Abolhassani A, Riazi GH, Azizi E, Amanpour S, Muhammadnejad S, Haddadi M, Zekri A, Shirkoohi R.	FGF-10, vimentin, N cadherin, snail, slug, TGF-β, E-cadherin, GSK3β
RhoGDI2 promotes epithelial-mesenchymal transition via induction of Snail in gastric cancer cells.	/pubmed/24721928	Cho HJ, Park SM, Kim IK, Nam IK, Baek KE, Im MJ, Yoo JM, Park SH, Ryu KJ, Han HT, Kim HJ, Hong SC, Kim KD, Pak Y, Kim JW, Lee CW, Yoo J.	Snail, RhoGDI2, E-cadherin, β-catenin, vimentin, fibronectin, Slug, Twist.
Fibroblast growth factor receptor splice variants are stable markers of oncogenic transforming growth factor Ô_1 signaling in metastatic breast cancers.	/pubmed/24618085	Wendt MK, Taylor MA, Schiemann BJ, Sossey-Alaoui K, Schiemann WP.	TGF-β1, E-cad
JAK/STAT3 signaling is required for TGF-Ô_-induced epithelial-mesenchymal transition in lung cancer cells.	/pubmed/24573038	Liu RY, Zeng Y, Lei Z, Wang L, Yang H, Liu Z, Zhao J, Zhang HT.	Smad3, TGF-β1, Smad3, Snail, JAK2, STAT3
[Expression and significance of FGFR2IIIc in chemoresistant bladder cancer cells].	/pubmed/24405590	Chen Y, Zhang L, Wu K, Zeng J, Gao Y, Wang X, Li H, Chang LS, He D.	P-glycoprotein, FGFR2, E-cadherin, vimentin
Deferoxamine enhances cell migration and invasion through promotion of HIF-1Ô± expression and epithelial-mesenchymal transition in colorectal cancer.	/pubmed/24173124	Zhang W, Wu Y, Yan Q, Ma F, Shi X, Zhao Y, Peng Y, Wang J, Jiang B.	HIF-1α, E-cadherin, plakoglobin, vimentin, N-cadherin
Long pentraxin-3 inhibits epithelial-mesenchymal transition in melanoma cells.	/pubmed/24130051	Ronca R, Di Salle E, Giacomini A, Leali D, Alessi P, Coltrini D, Ravelli C, Matarazzo S, Ribatti D, Vermi W, Presta M.	FGF2, FGFR, PTX3
Epithelial splicing regulatory protein 1 is a favorable prognostic factor in pancreatic cancer that attenuates pancreatic metastases.	/pubmed/24077287	Ueda J, Matsuda Y, Yamahatsu K, Uchida E, Naito Z, Korc M, Ishiwata T.	ESRP1, FGFR-2, ISE/ISS-3,
The FGFR1 inhibitor PD173074 induces mesenchymal-epithelial transition through the transcription factor AP-1.	/pubmed/24045665	Nguyen PT, Tsunematsu T, Yanagisawa S, Kudo Y, Miyauchi M, Kamata N, Takata T.	FGFR1, ERK1/2, p38 ,MMPs, AP-1, Snail1 and Snail2
Tumor-stromal interactions with direct cell contacts enhance motility of non-small cell lung cancer cells through the hedgehog signaling pathway.	/pubmed/24023301	Choe C, Shin YS, Kim SH, Jeon MJ, Choi SJ, Lee J, Kim J.	α-SMA, FAP, TGFβ, SMAD3, GLI1, SNAI1, SNAI2
N-cadherin/FGFR promotes metastasis through epithelial-to-mesenchymal transition and stem/progenitor cell-like properties.	/pubmed/23975425	Qian X, Anzovino A, Kim S, Suyama K, Yao J, Hulit J, Agiostratidou G, Chandiramani N, McDaid HM, Nagi C, Cohen HW, Phillips GR, Norton L, Hazan RB.	N-cadherin, HER2/neu, FGFR, Snail, Slug, ERK, AKT
FGFR4 promotes stroma-induced epithelial-to-mesenchymal transition in colorectal cancer.	/pubmed/23943801	Liu R, Li J, Xie K, Zhang T, Lei Y, Chen Y, Zhang L, Huang K, Wang K, Wu H, Wu M, Nice EC, Huang C, Wei Y.	FGFR4, β-catenin, CCL2, Ets-1
Identification of integrin Ô±3 as a molecular marker of cells undergoing epithelial-mesenchymal transition and of cancer cells with aggressive phenotypes.	/pubmed/23786209	Shirakihara T, Kawasaki T, Fukagawa A, Semba K, Sakai R, Miyazono K, Miyazawa K, Saitoh M.	TGF-β, SMA α, calponin. FGF-2, ITGA3, Ret, δEF-1, MEK 1/2, ERK
Utility of a bacterial infection model to study epithelial-mesenchymal transition, mesenchymal-epithelial transition or tumorigenesis.	/pubmed/23752178	Chandrakesan P, Roy B, Jakkula LU, Ahmed I, Ramamoorthy P, Tawfik O, Papineni R, Houchen C, Anant S, Umar S.	DCLK1, Lgr5, Msi-1, TGFβ, Wnt, Notch, vimentin, fibronectin
Senescent fibroblasts enhance early skin carcinogenic events via a paracrine MMP-PAR-1 axis.	/pubmed/23675494	Malaquin N, Vercamer C, Bouali F, Martien S, Deruy E, Wernert N, Chwastyniak M, Pinet F, Abbadie C, Pourtier A.	MMP-1, MMP-2, PAR-1
Enrichment map profiling of the cancer invasion front suggests regulation of colorectal cancer progression by the bone morphogenetic protein antagonist, gremlin-1.	/pubmed/23659962	Karagiannis GS, Berk A, Dimitromanolakis A, Diamandis EP.	BMP
EMT and EndMT: regulated in similar ways?	/pubmed/23613024	Saito A.	TGF-β
Ulinastatin exerts synergistic effects with taxotere and inhibits invasion and metastasis of breast cancer by blocking angiogenesis and the epithelial-mesenchymal transition.	/pubmed/23477357	Gao F, Sun Z, Sun X, Zhang Y, Wang H, Zhong B, Luo J, Zhao X.	none
Twist1 induces CCL2 and recruits macrophages to promote angiogenesis.	/pubmed/23329645	Low-Marchelli JM, Ardi VC, Vizcarra EA, van Rooijen N, Quigley JP, Yang J.	CCL2, Twist1
Connective tissue growth factor is overexpressed in human hepatocellular carcinoma and promotes cell invasion and growth.	/pubmed/23323010	Xiu M, Liu YH, Brigstock DR, He FH, Zhang RJ, Gao RP.	TGF-β1, CCN2
[Molecular mechanism of FGF8b regulation of epithelial-mesenchymal transition in prostate cancer cells].	/pubmed/22886216	Fan B, Wang G, Qi F, Li Z, Liu H.	ERK1/2, E-cadherin
Expression of the E-cadherin repressors Snail, Slug and Zeb1 in urothelial carcinoma of the urinary bladder: relation to stromal fibroblast activation and invasive behaviour of carcinoma cells.	/pubmed/22820858	Schulte J, Weidig M, Balzer P, Richter P, Franz M, Junker K, Gajda M, Friedrich K, Wunderlich H, ’_stman A, Petersen I, Berndt A.	E-cadherin, Snail, Slug, Zeb1, ASMA, S100A4, PDGFRβ, E-Cad, FGF, TGFβ1
MUC4 potentiates invasion and metastasis of pancreatic cancer cells through stabilization of fibroblast growth factor receptor 1.	/pubmed/22791819	Rachagani S, Macha MA, Ponnusamy MP, Haridas D, Kaur S, Jain M, Batra SK.	N-cadherin, FGFR1, FAK, MKK7, JNK, c-Jun, PI-3K, Akt, NF-κB, IkBα, uPA, MMP-9, vimentin, Twist, Slug, Zeb1, E-cadherin, Occludin, Cytokeratin-18, Caspase-9
c-Myc expression and MEK1-induced Erk2 nuclear localization are required for TGF-beta induced epithelial-mesenchymal transition and invasion in prostate cancer.	/pubmed/22791812	Amatangelo MD, Goodyear S, Varma D, Stearns ME.	Ras, TGF-β, Ras, Raf, MEK1, Erk2, c-myc, Erk2, E-cadherin, Vimentin, Fibronectin, S100A4, MMP1, MMP-2/9, Slug, Twist2. I
Lack of transforming growth factor-Ô_ signaling promotes collective cancer cell invasion through tumor-stromal crosstalk.	/pubmed/22748014	Matise LA, Palmer TD, Ashby WJ, Nashabi A, Chytil A, Aakre M, Pickup MW, Gorska AE, Zijlstra A, Moses HL.	TβRII, E-cadherin, p120, β-catenin, Igfbp4, Tspan13, Col1α2, Bmp7, Gng11, Vcan, Tmeff1, Dsc2
FGFR1-induced epithelial to mesenchymal transition through MAPK/PLCÔ_/COX-2-mediated mechanisms.	/pubmed/22701738	Tomlinson DC, Baxter EW, Loadman PM, Hull MA, Knowles MA.	FGFR1, MAPK, PLCγ, COX-2, prostaglandin E(2)
Transcription factors c-Myc and CDX2 mediate E-selectin ligand expression in colon cancer cells undergoing EGF/bFGF-induced epithelial-mesenchymal transition.	/pubmed/22547830	Sakuma K, Aoki M, Kannagi R.	EGF, bFGF, sLe(x/a), E-selectin, ST3GAL1/3/4, FUT3, FUT2, c-Myc, CDX2, VEGF, E-selectin
Acquisition of EMT phenotype in the gefitinib-resistant cells of a head and neck squamous cell carcinoma cell line through Akt/GSK-3Ô_/snail signalling pathway.	/pubmed/22315058	Maseki S, Ijichi K, Tanaka H, Fujii M, Hasegawa Y, Ogawa T, Murakami S, Kondo E, Nakanishi H.	E-cadherin, vimentin, snail, EGFR, Akt, GSK-3β
Separation and Characterization of Epithelial and Mesenchymal-like Murine Mammary Tumor Cells Reveals Epithelial Cell Differentiation Plasticity and Enhanced Tumorigenicity of Epithelial-enriched Tumor Cells.	/pubmed/22237886	Palen KA, Jing W, Weber JJ, Tilkens SB, Chan AM, Johnson BD, Gershan JA.	FGF-1, TGF-β
Alternative Splicing of Fibroblast Growth Factor Receptor IgIII Loops in Cancer.	/pubmed/22203889	Holzmann K, Grunt T, Heinzle C, Sampl S, Steinhoff H, Reichmann N, Kleiter M, Hauck M, Marian B.	FGFR 1-3 IIIb and IIIc
A dynamic in vivo model of epithelial-to-mesenchymal transitions in circulating tumor cells and metastases of breast cancer.	/pubmed/22120722	Bonnomet A, Syne L, Brysse A, Feyereisen E, Thompson EW, No’âl A, Foidart JM, Birembaut P, Polette M, Gilles C.	vimentin, Snail, Slug, fibroblast-specific protein-1, E-cadherin, ZO-3, JAM-A
A novel human Smad4 mutation is involved in papillary thyroid carcinoma progression.	/pubmed/22109972	D'Inzeo S, Nicolussi A, Donini CF, Zani M, Mancini P, Nardi F, Coppa A.	Smad4, TGFβ, E-cadherin,
Cyclooxygenase-2 and Akt mediate multiple growth-factor-induced epithelial-mesenchymal transition in human hepatocellular carcinoma.	/pubmed/22097969	Ogunwobi OO, Wang T, Zhang L, Liu C.	TGF-β-1, EGF, HGF, bFGF, E-cadherin, albumin, α-1 anti-trypsin, vimentin, collagen I, fibronectin. COX-2, PGE2, Akt
Transcriptional networks in epithelial-mesenchymal transition.	/pubmed/21980432	Venkov C, Plieth D, Ni T, Karmaker A, Bian A, George AL Jr, Neilson EG.	SRY, FTS-1, Evi-1, GC-Box, Atf2, Klf10, Sox11, SP1
Epithelial to mesenchymal transition by TGFÔ_-1 induction increases stemness characteristics in primary non small cell lung cancer cell line.	/pubmed/21738704	Pirozzi G, Tirino V, Camerlingo R, Franco R, La Rocca A, Liguori E, Martucci N, Paino F, Normanno N, Rocco G.	TGFβ-1, vimentin, CD90, cytocheratin, e-cadherin, CD326, Slug, Twist, β-catenin, Oct4, Nanog, Sox2, CD133
Transforming growth factor-Ô_1 induces epithelial-to-mesenchymal transition in human lung cancer cells via PI3K/Akt and MEK/Erk1/2 signaling pathways.	/pubmed/21713404	Chen XF, Zhang HJ, Wang HB, Zhu J, Zhou WY, Zhang H, Zhao MC, Su JM, Gao W, Zhang L, Fei K, Zhang HT, Wang HY.	TGF-β1, PI3K/Akt, MAPK/Erk1/2, E-cadherin, Vimentin, Fibronectin. Erk1/2
TGF-Ô_1 mediates epithelial to mesenchymal transition via the TGF-Ô_/Smad pathway in squamous cell carcinoma of the head and neck.	/pubmed/21479366	Yu C, Liu Y, Huang D, Dai Y, Cai G, Sun J, Xu T, Tian Y, Zhang X.	TGF-β1, E-cadherin, vimentin, Smad
A systems view of epithelial-mesenchymal transition signaling states.	/pubmed/21194007	Thomson S, Petti F, Sujka-Kwok I, Mercado P, Bean J, Monaghan M, Seymour SL, Argast GM, Epstein DM, Haley JD.	EGFR, IGF1R, MET, RON, IL11, IL6, JAK2, STAT, fibronectin, integrin α5β1, Axl, Tyro3, PDGFR, FGFR, TGFβR, CD49f, EpCAM, CD44, CD24,
TWIST1 promotes invasion through mesenchymal change in human glioblastoma.	/pubmed/20646316	Mikheeva SA, Mikheev AM, Petit A, Beyer R, Oxford RG, Khorasani L, Maxwell JP, Glackin CA, Wakimoto H, Gonz’lez-Herrero I, S’nchez-Garc’_a I, Silber JR, Horner PJ, Rostomily RC.	TWIST1, SNAI2, MMP2, HGF, FAP, FN1., E-cadherin, N-cadherin, SNAI2
Bcl-2 overexpression induces a partial epithelial to mesenchymal transition and promotes squamous carcinoma cell invasion and metastasis.	/pubmed/20145039	Zuo J, Ishikawa T, Boutros S, Xiao Z, Humtsoe JO, Kramer RH.	Bcl-2, N-cadherin, vimentin, MMP-9, FGFR-1, extracellular signal-regulated kinase
Expression of Snail is associated with myofibroblast phenotype development in oral squamous cell carcinoma.	/pubmed/19198871	Franz M, Spiegel K, Umbreit C, Richter P, Codina-Canet C, Berndt A, Altendorf-Hofmann A, Koscielny S, Hyckel P, Kosmehl H, Virtanen I, Berndt A.	E-cadherin, alpha SMA, TGF beta 1, EGF, Snail, vimentin
Kinase switching in mesenchymal-like non-small cell lung cancer lines contributes to EGFR inhibitor resistance through pathway redundancy.	/pubmed/18696232	Thomson S, Petti F, Sujka-Kwok I, Epstein D, Haley JD.	EGFR, PDGFR, FGFR, MEK, ERK, PI3K, ErbB3, Mek, Erk, TGFbeta receptors
Inducible FGFR-1 activation leads to irreversible prostate adenocarcinoma and an epithelial-to-mesenchymal transition.	/pubmed/18068632	Acevedo VD, Gangula RD, Freeman KW, Li R, Zhang Y, Wang F, Ayala GE, Peterson LE, Ittmann M, Spencer DM.	FGFR1, Sox9, Wnt, Fzd4
Lupeol suppresses cisplatin-induced nuclear factor-kappaB activation in head and neck squamous cell carcinoma and inhibits local invasion and nodal metastasis in an orthotopic nude mouse model.	/pubmed/17875721	Lee TK, Poon RT, Wo JY, Ma S, Guan XY, Myers JN, Altevogt P, Yuen AP.	NF-kappaB
Mesenchymal-to-epithelial transition facilitates bladder cancer metastasis: role of fibroblast growth factor receptor-2.	/pubmed/17145872	Chaffer CL, Brennan JP, Slavin JL, Blick T, Thompson EW, Williams ED.	FGFR, FGFR2IIIc, MET
HOXB7, a homeodomain protein, is overexpressed in breast cancer and confers epithelial-mesenchymal transition.	/pubmed/17018609	Wu X, Chen H, Parker B, Rubin E, Zhu T, Lee JS, Argani P, Sukumar S.	HOXB7, claudin 1, claudin 7, claudin 4, E-cadheri, vimentin, alpha-SMA, bFGF, Ras, RhoA, p44, p42, MAPK; extracellular signal-regulated kinases 1 and 2, FGFR,
Endothelin-1 is required during epithelial to mesenchymal transition in ovarian cancer progression.	/pubmed/16741062	Rosan’_ L, Spinella F, Di Castro V, Decandia S, Nicotra MR, Natali PG, Bagnato A.	ET-1, E-cadherin, beta-catenin, zonula occludens-1, N-cadherin, vimentin, ET(A)R
Transduction of a mesenchyme-specific gene periostin into 293T cells induces cell invasive activity through epithelial-mesenchymal transformation.	/pubmed/16702213	Yan W, Shao R.	EGFR, MMP-9.
The tumor suppressor Smad4 is required for transforming growth factor beta-induced epithelial to mesenchymal transition and bone metastasis of breast cancer cells.	/pubmed/16489022	Deckers M, van Dinther M, Buijs J, Que I, L’_wik C, van der Pluijm G, ten Dijke P.	TGF-beta, Smad, interleukin 11
N-cadherin expression and epithelial-mesenchymal transition in pancreatic carcinoma.	/pubmed/15217949	Nakajima S, Doi R, Toyoda E, Tsuji S, Wada M, Koizumi M, Tulachan SS, Ito D, Kami K, Mori T, Kawaguchi Y, Fujimoto K, Hosotani R, Imamura M.	N-cadherin, FGF, TGF, E-cadherin
Ras and TGF[beta] cooperatively regulate epithelial cell plasticity and metastasis: dissection of Ras signaling pathways.	/pubmed/11790801	Janda E, Lehmann K, Killisch I, Jechlinger M, Herzig M, Downward J, Beug H, Gr’_nert S.	TGFbeta, TGFbeta, Ras, FGF, HGF, MAPK, PI3K, Raf

## Sheet: EGF.MC
EGF (338)
Title	URL	Description	Gene(s)
The canonical TGF-Ô_/Smad signalling pathway is involved in PD-L1-induced primary resistance to EGFR-TKIs in EGFR-mutant non-small-cell lung cancer.	/pubmed/31331328	Zhang Y, Zeng Y, Liu T, Du W, Zhu J, Liu Z, Huang JA.	PD-L1, Smad3, TGF-β1
HEG1 indicates poor prognosis and promotes hepatocellular carcinoma invasion, metastasis, and EMT by activating Wnt/Ô_-catenin signaling.	/pubmed/31278131	Zhao YR, Wang JL, Xu C, Li YM, Sun B, Yang LY.	HEG1, β-catenin, Wnt
FRK plays an oncogenic role in nonsmall cell lung cancer by enhancing the stemness phenotype via induction of metabolic reprogramming.	/pubmed/31251822	Zhang L, Yang Y, Chai L, Bu H, Yang Y, Huang H, Ran J, Zhu Y, Li L, Chen F, Li W.	FRK, CD44, CD133
CAPE-pNO(2) Inhibited the Growth and Metastasis of Triple-Negative Breast Cancer via the EGFR/STAT3/Akt/E-Cadherin Signaling Pathway.	/pubmed/31214503	Huang Q, Li S, Zhang L, Qiao X, Zhang Y, Zhao X, Xiao G, Li Z.	VEGFA, Ki-67, EGFR, STAT3, Akt, MMP-2, MMP-9, Survivin, Vimentin, N-cadherin, E-cadherin
Multiplex quantitative analysis of stroma-mediated cancer cell invasion, matrix remodeling, and drug response in a 3D co-culture model of pancreatic tumor spheroids and stellate cells.	/pubmed/31200779	Hwang HJ, Oh MS, Lee DW, Kuh HJ.	IL-6, IL-8, IGF-1, EGF, TIMP-1, uPA, PAI-1, and TSP-1
Targeting slug-mediated non-canonical activation of c-Met to overcome chemo-resistance in metastatic ovarian cancer cells.	/pubmed/31193822	Chang L, Hu Y, Fu Y, Zhou T, You J, Du J, Zheng L, Cao J, Ying M, Dai X, Su D, He Q, Zhu H, Yang B.	slug, c-Met, fibronectin, integrin α V, p-Met
CUL1 Knockdown Attenuates the Adhesion, Invasion, and Migration of Triple-Negative Breast Cancer Cells via Inhibition of Epithelial-Mesenchymal Transition.	/pubmed/31175550	Ren ZQ, Yan WJ, Zhang XZ, Zhang PB, Zhang C, Chen SK.	Snail1/2, ZEB1/2, Twist1/2, Vimentin, CK18, Akt, GSK3β, EGFR, β-catenin
Sonic hedgehog pathway activation is associated with cetuximab resistance and EPHB3 receptor induction in colorectal cancer.	/pubmed/31149041	Park SH, Jo MJ, Kim BR, Jeong YA, Na YJ, Kim JL, Jeong S, Yun HK, Kim DY, Kim BG, Kang SH, Oh SC, Lee DH.	EFNB3, STAT3, EGFR, GLI-1, SOX2, Vimentin
Anti-EMT properties of CoQ0 attributed to PI3K/AKT/NFKB/MMP-9 signaling pathway through ROS-mediated apoptosis.	/pubmed/31068208	Yang HL, Thiyagarajan V, Shen PC, Mathew DC, Lin KY, Liao JW, Hseu YC.	MMP-2/- 9, uPA, uPAR, VEGF, TIMP-1/2, TGF-β, TNF-α, β-catenin
M2-like tumor-associated macrophages-secreted EGF promotes epithelial ovarian cancer metastasis via activating EGFR-ERK signaling and suppressing lncRNA LIMT expression.	/pubmed/31062668	Zeng XY, Xie H, Yuan J, Jiang XY, Yong JH, Zeng D, Dou YY, Xiao SS.	EGF, N-cadherin, Vimentin, EGFR, ERK, E-cadherin, LIMT
The association between EGF A61G polymorphism and risk of colorectal cancer in a Chinese population: a case-control study.	/pubmed/31053624	Zhu X, Shen Y, Xie Q.	EGF
KIAA1199 promotes sorafenib tolerance and the metastasis of hepatocellular carcinoma by activating the EGF/EGFR-dependent epithelial-mesenchymal transition program.	/pubmed/30980868	Xu Y, Xu H, Li M, Wu H, Guo Y, Chen J, Shan J, Chen X, Shen J, Ma Q, Liu J, Wang M, Zhao W, Hong J, Qi Y, Yao C, Zhang Q, Yang Z, Qian C, Li J.	KIAA1199, EGF
Nimotuzumab inhibits epithelial-mesenchymal transition in prostate cancer by targeting the Akt/YB-1/AR axis.	/pubmed/30907986	Hu S, Duan YX, Zhou Q, Wang Y, Lu Q.	Akt, YB-1, AR
Reduction in milk fat globule-EGF factor 8 inhibits triple-negative breast cancer cell viability and migration.	/pubmed/30867784	Yang Y, Li J, Song Q, Zhu K, Yu X, Tian Y, Zhang J.	MFG-E8
GSK3Ô_ regulates epithelial-mesenchymal transition and cancer stem cell properties in triple-negative breast cancer.	/pubmed/30845991	Vijay GV, Zhao N, Den Hollander P, Toneff MJ, Joseph R, Pietila M, Taube JH, Sarkar TR, Ramirez-Pena E, Werden SJ, Shariati M, Gao R, Sobieski M, Stephan CC, Sphyris N, Miura N, Davies P, Chang JT, Soundararajan R, Rosen JM, Mani SA.	GSK3β
Assessing metastatic potential of breast cancer cells based on EGFR dynamics.	/pubmed/30833579	Liu YL, Chou CK, Kim M, Vasisht R, Kuo YA, Ang P, Liu C, Perillo EP, Chen YA, Blocher K, Horng H, Chen YI, Nguyen DT, Yankeelov TE, Hung MC, Dunn AK, Yeh HC.	EGFR
Long non-coding RNA ZEB2-AS1 promotes the proliferation, metastasis and epithelial mesenchymal transition in triple-negative breast cancer by epigenetically activating ZEB2.	/pubmed/30825262	Zhang G, Li H, Sun R, Li P, Yang Z, Liu Y, Wang Z, Yang Y, Yin C.	LncRNA, ZEB2, AS1, PI3K, Akt, GSK3β, EGF, F-actin
TRPM7 promotes the epithelial-mesenchymal transition in ovarian cancer through the calcium-related PI3K / AKT oncogenic signaling.	/pubmed/30819230	Liu L, Wu N, Wang Y, Zhang X, Xia B, Tang J, Cai J, Zhao Z, Liao Q, Wang J.	TRPM7, E-cadherin, N-cadherin, Vimentin, Twist, EGF, IGF, PI3K, AKT
ATXN2L upregulated by epidermal growth factor promotes gastric cancer cell invasiveness and oxaliplatin resistance.	/pubmed/30787271	Lin L, Li X, Pan C, Lin W, Shao R, Liu Y, Zhang J, Luo Y, Qian K, Shi M, Bin J, Liao Y, Liao W.	ATXN2L, EGF, PI3K, Akt, EGFR
EYA2 Correlates With Clinico-Pathological Features of Breast Cancer, Promotes Tumor Proliferation, and Predicts Poor Survival.	/pubmed/30761270	Xu H, Jiao Y, Yi M, Zhao W, Wu K.	EYA2, ER, PR, HER2
Axl kinase drives immune checkpoint and chemokine signalling pathways in lung adenocarcinomas.	/pubmed/30744655	Tsukita Y, Fujino N, Miyauchi E, Saito R, Fujishima F, Itakura K, Kyogoku Y, Okutomo K, Yamada M, Okazaki T, Sugiura H, Inoue A, Okada Y, Ichinose M.	MAPK, Axl kinase, PD-L1, CXCR6, EGFR
Clonal MET Amplification as a Determinant of Tyrosine Kinase Inhibitor Resistance in Epidermal Growth Factor Receptor-Mutant Non-Small-Cell Lung Cancer.	/pubmed/30676858	Lai GGY, Lim TH, Lim J, Liew PJR, Kwang XL, Nahar R, Aung ZW, Takano A, Lee YY, Lau DPX, Tan GS, Tan SH, Tan WL, Ang MK, Toh CK, Tan BS, Devanand A, Too CW, Gogna A, Ong BH, Koh TPT, Kanesvaran R, et al.	MET, EGFR
p73 induction by Abrus agglutinin facilitates Snail ubiquitination to inhibit epithelial to mesenchymal transition in oral cancer.	/pubmed/30668428	Sinha N, Meher BR, Naik PP, Panda PK, Mukhapadhyay S, Maiti TK, Bhutia SK.	p73, Snail, EGF, ERK1/2, SOX2, vimentin, E-cadherin
A complex between phosphatidylinositol 4-kinase IIÔ± and integrin Ô±3Ô_1 is required for N-glycan sialylation in cancer cells.	/pubmed/30659093	Isaji T, Im S, Kameyama A, Wang Y, Fukuda T, Gu J.	PI4KIIα, Akt, integrin α3, integrin α3β1, EGFR
Activation of LncRNA TINCR by H3K27 acetylation promotes Trastuzumab resistance and epithelial-mesenchymal transition by targeting MicroRNA-125b in breast Cancer.	/pubmed/30621694	Dong H, Hu J, Zou K, Ye M, Chen Y, Wu C, Chen X, Han M.	TINCR, miR-125b, HER-2, Snail-1, CBP
The prognostic and therapeutic implications of circulating tumor cell phenotype detection based on epithelial-mesenchymal transition markers in the first-line chemotherapy of HER2-negative metastatic breast cancer.	/pubmed/30606259	Guan X, Ma F, Li C, Wu S, Hu S, Huang J, Sun X, Wang J, Luo Y, Cai R, Fan Y, Li Q, Chen S, Zhang P, Li Q, Xu B.	none
[truncated: 312 more rows]

## Sheet: BMP.MC
BMP
Title	URL	Description	Gene(s)
[truncated: 71 more rows]

## Sheet: ECM.MC
ECM
Title	URL	Description	Gene(s)
[truncated: 345 more rows]

## Sheet: GPCR.MC
GPCR
Title	URL	Description	Gene(s)
[truncated: 216 more rows]

## Sheet: IGF.MC
IGF
Title	URL	Description	Gene(s)
[truncated: 88 more rows]

[truncated: 5 more sheets: Wnt.MC, Notch.MC, Hh.MC, Hippo.MC, FAS.MC]
